# Supplementary material for: Quantitative profiling of protease specificity
Source: PLoS Comput Biol. 2021 Feb 22;17(2):e1008101. doi: 10.1371/journal.pcbi.1008101 (PMC7932537; doi:10.1371/journal.pcbi.1008101)
Supplement: S16 Table — The data have been divided into two groups–those annotated as physiologic substrates (A)–MMP2, (C)–MMP9, and all substrates (B)–MMP2, (D)–MMP9. Each table contains information about octamer sequences covering P4-P4՛ positions of substrates as reported in MEROPS, the corresponding tetramers, their ranks and relative probabilities, as well as MEROPS annotation relating the cleavage site to its position in a protein or analyzed polypeptide. Tab (E) General Statistics–contains information about the number of all and physiologic substrates found in MEROPS that have their RP values above the corresponding selectome thresholds for MMP-2 and 9 enzymes. Tab F contain information about the common set of MMP-2 and 9 physiologic substrates found in MEROPS. The P3-P1՛ tetramer rankings and corresponding RP values are provided for both MMP-2 and 9 together with corresponding correlation plot between RP values. The tabs G and H contain the same type of information, as in the Tab F, for unique physiologic substrates for MMP-2 and 9, respectively. (XLSX) [file pcbi.1008101.s018.xlsx]

## Sheet: A.MMP2 physiologic subst MEROPS
S17 Table. (A) Tetramer annotation of MMP-2 cleavage sites in physiologic substrates collected in MEROPS database
MEROPS octamers	tetramer sequence	Relative probability (RP) rank	relative probability (RP)	MMP2 substrates. Merops annotation:	Substrate	Uniprot	Residue range	Cleavage Site	Cleavage type	Evidence	P4	P3	P2	P1	P1'	P2'	P3'	P4'	Reference	CutDB
LLAHAFAP	LAHA	4607	10.83		72 kDa type IV collagenase	P08253	110-660	peptide-His193+Ala-peptide	P	MS	Leu	Leu	Ala	His	Ala	Phe	Ala	Pro	auf dem Keller et al., 2010
AFAPGTGV	FAPG	57652	0.08		72 kDa type IV collagenase	P08253	110-660	peptide-Pro197+Gly-peptide	P	MS	Ala	Phe	Ala	Pro	Gly	Thr	Gly	Val	auf dem Keller et al., 2010
YRIIGYTP	RIIG	57851	0.08		72 kDa type IV collagenase	P08253	110-660	peptide-Ile129+Gly-peptide	P	MS	Tyr	Arg	Ile	Ile	Gly	Tyr	Thr	Pro	auf dem Keller et al., 2010
RFSRIHDG	FSRI	28778	0.35		72 kDa type IV collagenase	P08253	110-660	peptide-Arg161+Ile-peptide	P	MS	Arg	Phe	Ser	Arg	Ile	His	Asp	Gly	auf dem Keller et al., 2010
PEICKQDI	EICK	150991	0		72 kDa type IV collagenase	P08253	110-660	peptide-Cys469+Lys-peptide	P	MS	Pro	Glu	Ile	Cys	Lys	Gln	Asp	Ile	auf dem Keller et al., 2010
FLGNKYES	LGNK	90601	0		72 kDa type IV collagenase	P08253	110-660	peptide-Asn358+Lys-peptide	P	MS	Phe	Leu	Gly	Asn	Lys	Tyr	Glu	Ser	auf dem Keller et al., 2010
QTGDLDQN	TGDL	13533	1.45		72 kDa type IV collagenase	P08253	110-660	peptide-Asp88+Leu-peptide	P	MS	Gln	Thr	Gly	Asp	Leu	Asp	Gln	Asn	auf dem Keller et al., 2010
VGGDSHFD	GGDS	115716	0		72 kDa type IV collagenase	P08253	110-660	peptide-Asp204+Ser-peptide	P	MS	Val	Gly	Gly	Asp	Ser	His	Phe	Asp	auf dem Keller et al., 2010
KNKKTYIF	NKKT	125006	0		72 kDa type IV collagenase	P08253	110-660	peptide-Lys579+Thr-peptide	P	MS	Lys	Asn	Lys	Lys	Thr	Tyr	Ile	Phe	auf dem Keller et al., 2010
LGNKYESC	GNKY	124966	0		72 kDa type IV collagenase	P08253	110-660	peptide-Lys359+Tyr-peptide	P	MS	Leu	Gly	Asn	Lys	Tyr	Glu	Ser	Cys	auf dem Keller et al., 2010
RAFQVWSD	AFQV	105758	0		72 kDa type IV collagenase	P08253	110-660	peptide-Gln149+Val-peptide	P	MS	Arg	Ala	Phe	Gln	Val	Trp	Ser	Asp	auf dem Keller et al., 2010
TSEDLVVQ	SEDL	78079	0.04		aggrecan core protein	P16112	17-2415	peptide-Asp460+Leu-peptide	P		Thr	Ser	Glu	Asp	Leu	Val	Val	Gln	Fosang et al., 1998	18235
IPENFFGV	PENF	2770	16		aggrecan core protein	P16112	17-2415	peptide-Asn360+Phe-peptide	P		Ile	Pro	Glu	Asn	Phe	Phe	Gly	Val	Fosang et al., 1992	18231
GHARLVHV	HARL	2341	17.65		alpha-2-macroglobulin	P01023	24-1474	peptide-Arg719+Leu-peptide	P		Gly	His	Ala	Arg	Leu	Val	His	Val	Arbelaez et al., 1997	3224
GPEGLRVG	PEGL	393	29.5		alpha-2-macroglobulin	P01023	24-1474	peptide-Gly702+Leu-peptide	P		Gly	Pro	Glu	Gly	Leu	Arg	Val	Gly	Arbelaez et al., 1997	3223
RPAVMTSP	PAVM	2339	17.65		basic fibroblast growth factor receptor 1	P11362	22-822	peptide-Val368+Met-peptide	P		Arg	Pro	Ala	Val	Met	Thr	Ser	Pro	Levi et al., 1996	3225
IIGLMVGG	IGLM	1895	19.51		beta-amyloid protein 40	P05067	672-711	peptide-Leu705+Met-peptide	P		Ile	Ile	Gly	Leu	Met	Val	Gly	Gly	Roher et al., 1995	21330
IGLMVGGV	GLMV	24432	0.47		beta-amyloid protein 40	P05067	672-711	peptide-Met706+Val-peptide	P		Ile	Gly	Leu	Met	Val	Gly	Gly	Val	Roher et al., 1995	21331
HHQKLVFF	HQKL	10822	2.29		beta-amyloid protein 40	P05067	672-711	peptide-Lys687+Leu-peptide	P		His	His	Gln	Lys	Leu	Val	Phe	Phe	Roher et al., 1995	21332
VPYGLGSP	PYGL	101	33		big endothelin 1	P05305	53-90	peptide-Gly84+Leu-peptide	P		Val	Pro	Tyr	Gly	Leu	Gly	Ser	Pro	Fernandez-Patron et al., 1999	18588
HPSAFSEA	PSAF	103	32.96		brevican core protein precursor	P55068	23-833	peptide-Ala360+Phe-peptide	P		His	Pro	Ser	Ala	Phe	Ser	Glu	Ala	Nakamura et al., 2001	18214
SRGAIYSI	RGAI	16299	1.01		brevican core protein precursor	P55068	23-833	peptide-Ala399+Ile-peptide	P		Ser	Arg	Gly	Ala	Ile	Tyr	Ser	Ile	Nakamura et al., 2001	18221
TPSEEKSG	PSEE	136226	0		brevican core protein precursor	P55068	23-833	peptide-Glu588+Glu-peptide	P		Thr	Pro	Ser	Glu	Glu	Lys	Ser	Gly	Nakamura et al., 2001	18222
LTGTSVQA	TGTS	59932	0.08		brevican core protein precursor	P55068	23-833	peptide-Thr599+Ser-peptide	P		Leu	Thr	Gly	Thr	Ser	Val	Gln	Ala	Nakamura et al., 2001	18223
QPVGINTS	PVGI	65	33.53		C-C motif chemokine 7	P80098	24-99	peptide-Gly27+Ile-peptide	P		Gln	Pro	Val	Gly	Ile	Asn	Thr	Ser	McQuibban et al., 2002	18381
SSRCPWEA	SRCP	110557	0		C-C motif chemokine 7	Q03366	24-97	peptide-Cys57+Pro-peptide	P	NT	Ser	Ser	Arg	Cys	Pro	Trp	Glu	Ala	Greenlee et al., 2006
APSSVIAA	PSSV	1685	20.49		C-X-C motif chemokine 5	P50228	41-132	Ala-Pro-Ser-Ser44+Val-peptide	P	NT	Ala	Pro	Ser	Ser	Val	Ile	Ala	Ala	Tester et al., 2007
RLAGLLSR	LAGL	174	32.24		CALCB	P10092	82-118	peptide-Gly95+Leu-peptide	P		Arg	Leu	Ala	Gly	Leu	Leu	Ser	Arg	Fernandez-Patron et al., 2000	18591
CSRDAIVF	SRDA	91596	0		Chemokine (C-C motif) ligand 17	Q9WUZ6	21-93	peptide-Asp60+Ala-peptide	P	NT	Cys	Ser	Arg	Asp	Ala	Ile	Val	Phe	Greenlee et al., 2006
LGSSYQLM	GSSY	19284	0.73		Chitinase-3-like protein 3	O35744	1-398	peptide-Ser21+Tyr-peptide	P	NT	Leu	Gly	Ser	Ser	Tyr	Gln	Leu	Met	Greenlee et al., 2006
GPQGIAGQ	PQGI	461	28.82		collagen alpha 1(I) chain	P02453	162-1215	peptide-Gly775+Ile-peptide	P		Gly	Pro	Gln	Gly	Ile	Ala	Gly	Gln	Aimes & Quigley, 1995
GPQGLLGA	PQGL	67	33.52		collagen alpha 2(I) chain	P02465	80-1100	peptide-Gly775+Leu-peptide	P		Gly	Pro	Gln	Gly	Leu	Leu	Gly	Ala	Aimes & Quigley, 1995
GPQGLAGQ	PQGL	67	33.52		collagen alpha-1(II) chain	P02458	182-1241	peptide-Gly906-Leu-peptide	P	MS	Gly	Pro	Gln	Gly	Leu	Ala	Gly	Gln	Zhen et al., 2008	22825
QKGDAGAP	KGDA	114725	0		collagen alpha-1(II) chain	P02458	182-1241	peptide-Asp859+Ala-peptide	P	MS	Gln	Lys	Gly	Asp	Ala	Gly	Ala	Pro	Zhen et al., 2008	22633
GPTGVTGP	PTGV	3664	13.32		collagen alpha-1(II) chain	P02458	182-1241	peptide-Gly879+Val-peptide	P	MS	Gly	Pro	Thr	Gly	Val	Thr	Gly	Pro	Zhen et al., 2008	22634
GPKGARGD	PKGA	97285	0		collagen alpha-1(II) chain	P02458	182-1241	peptide-Gly930+Ala-peptide	P	MS	Gly	Pro	Lys	Gly	Ala	Arg	Gly	Asp	Zhen et al., 2008	22810
GPSGDQGA	PSGD	42623	0.16		collagen alpha-1(II) chain	P02458	182-1241	peptide-Gly1149+Asp-peptide	P	MS	Gly	Pro	Ser	Gly	Asp	Gln	Gly	Ala	Zhen et al., 2008	22830
GPSGKDGA	PSGK	11338	2.08		collagen alpha-1(II) chain	P02458	182-1241	peptide-Gly1173+Lys-peptide	P	MS	Gly	Pro	Ser	Gly	Lys	Asp	Gly	Ala	Zhen et al., 2008	22832
GPPGATGF	PPGA	99386	0		collagen alpha-1(II) chain	P02458	182-1241	peptide-Gly894+Ala-peptide	P	MS	Gly	Pro	Pro	Gly	Ala	Thr	Gly	Phe	Zhen et al., 2008	22893
GPPGSNGN	PPGS	52284	0.1		collagen alpha-1(II) chain	P02458	182-1241	peptide-Gly909+Ser-peptide	P	MS	Gly	Pro	Pro	Gly	Ser	Asn	Gly	Asn	Zhen et al., 2008	22901
QLGVMQGP	LGVM	7712	4.76		collagen alpha-1(II) chain	P02458	182-1241	peptide-Val198+Met-peptide	P	MS	Gln	Leu	Gly	Val	Met	Gln	Gly	Pro	Zhen et al., 2008	22907
EPGKQGAP	PGKQ	38075	0.2		collagen alpha-1(II) chain	P02458	182-1241	peptide-Lys1006+Gln-peptide	P	MS	Glu	Pro	Gly	Lys	Gln	Gly	Ala	Pro	Zhen et al., 2008	22913
GPPGLTGP	PPGL	1031	24.36		collagen alpha-1(II) chain	P02458	182-1241	peptide-Gly1026+Leu-peptide	P	MS	Gly	Pro	Pro	Gly	Leu	Thr	Gly	Pro	Zhen et al., 2008	22915
GPQGFQGN	PQGF	651	27.05		collagen alpha-1(II) chain	P02458	182-1241	peptide-Gly222+Phe-peptide	P	MS	Gly	Pro	Gln	Gly	Phe	Gln	Gly	Asn	Zhen et al., 2008	22916
GAAGVKGD	AAGV	18949	0.76		collagen alpha-1(II) chain	P02458	182-1241	peptide-Gly1053+Val-peptide	P	MS	Gly	Ala	Ala	Gly	Val	Lys	Gly	Asp	Zhen et al., 2008	22922
GPTGKQGD	PTGK	75132	0.04		collagen alpha-1(II) chain	P02458	182-1241	peptide-Gly1083+Lys-peptide	P	MS	Gly	Pro	Thr	Gly	Lys	Gln	Gly	Asp	Zhen et al., 2008	22926
GAKGSAGA	AKGS	76793	0.04		collagen alpha-1(II) chain	P02458	182-1241	peptide-Gly420+Ser-peptide	P	MS	Gly	Ala	Lys	Gly	Ser	Ala	Gly	Ala	Zhen et al., 2008	22930
LGPKGQTG	GPKG	13336	1.49		collagen alpha-1(II) chain	P02458	182-1241	peptide-Lys452+Gly-peptide	P	MS	Leu	Gly	Pro	Lys	Gly	Gln	Thr	Gly	Zhen et al., 2008	22932
GPRGRSGE	PRGR	36410	0.22		collagen alpha-1(II) chain	P02458	182-1241	peptide-Gly1191+Arg-peptide	P	MS	Gly	Pro	Arg	Gly	Arg	Ser	Gly	Glu	Zhen et al., 2008	22934
DMSAFAGL	MSAF	1585	20.95		collagen alpha-1(II) chain	P02458	182-1241	peptide-Ala1222+Phe-peptide	P	MS	Asp	Met	Ser	Ala	Phe	Ala	Gly	Leu	Zhen et al., 2008	22945
GPPGRAGE	PPGR	44199	0.15		collagen alpha-1(II) chain	P02458	182-1241	peptide-Gly939+Arg-peptide	P	MS	Gly	Pro	Pro	Gly	Arg	Ala	Gly	Glu	Zhen et al., 2008	22947
GPPGEKGE	PPGE	92350	0		collagen alpha-1(II) chain	P02458	182-1241	peptide-Gly954+Glu-peptide	P	MS	Gly	Pro	Pro	Gly	Glu	Lys	Gly	Glu	Zhen et al., 2008	22948
GAPGNRGF	APGN	8774	3.62		collagen alpha-1(II) chain	P02458	182-1241	peptide-Gly513+Asn-peptide	P	MS	Gly	Ala	Pro	Gly	Asn	Arg	Gly	Phe	Zhen et al., 2008	22950
GPSGLAGP	PSGL	7	35.5		collagen alpha-1(II) chain	P02458	182-1241	peptide-Gly537+Leu-peptide	P	MS	Gly	Pro	Ser	Gly	Leu	Ala	Gly	Pro	Zhen et al., 2008	22957
GAPGLRGL	APGL	5899	7.85		collagen alpha-1(II) chain	P02458	182-1241	peptide-Gly627+Leu-peptide	P	MS	Gly	Ala	Pro	Gly	Leu	Arg	Gly	Leu	Zhen et al., 2008	22997
GFTGLQGL	FTGL	53054	0.1		collagen alpha-1(II) chain	P02458	182-1241	peptide-Gly1137+Leu-peptide	P	MS	Gly	Phe	Thr	Gly	Leu	Gln	Gly	Leu	Zhen et al., 2008	23019
GLRGLPGK	LRGL	1712	20.33		collagen alpha-1(II) chain	P02458	182-1241	peptide-Gly630+Leu-peptide	P	MS	Gly	Leu	Arg	Gly	Leu	Pro	Gly	Lys	Zhen et al., 2008	23029
GPAGERGE	PAGE	70200	0.05		collagen alpha-1(II) chain	P02458	182-1241	peptide-Gly651+Glu-peptide	P	MS	Gly	Pro	Ala	Gly	Glu	Arg	Gly	Glu	Zhen et al., 2008	23033
GAPGFPGP	APGF	20874	0.64		collagen alpha-1(II) chain	P02458	182-1241	peptide-Gly432+Phe-peptide	P	MS	Gly	Ala	Pro	Gly	Phe	Pro	Gly	Pro	Zhen et al., 2008	23065
GPPGERGA	PPGE	92350	0		collagen alpha-1(II) chain	P02458	182-1241	peptide-Gly507+Glu-peptide	P	MS	Gly	Pro	Pro	Gly	Glu	Arg	Gly	Ala	Zhen et al., 2008	23078
GPQGLAGQ	PQGL	67	33.52		collagen alpha-1(II) chain	P02458	182-1241	peptide-Gly906-Leu-peptide	P	MS	Gly	Pro	Gln	Gly	Leu	Ala	Gly	Gln	Zhen et al., 2008	22825
GQRGIVGL	QRGI	6090	7.48		Collagen alpha-1(II) chain isoform 2	P02458	182-1241	peptide-Gly981+Ile-peptide	P	MS	Gly	Gln	Arg	Gly	Ile	Val	Gly	Leu	Zhen et al., 2008	23040
QQGAIGSP	QGAI	11730	1.94		collagen alpha-1(III) chain	P02461	154-1221	peptide-Ala1129+Ile-peptide	P	MS	Gln	Gln	Gly	Ala	Ile	Gly	Ser	Pro	Zhen et al., 2008	22891
GPPGKDGT	PPGK	45917	0.14		collagen alpha-1(III) chain	P02461	154-1221	peptide-Gly1149+Lys-peptide	P	MS	Gly	Pro	Pro	Gly	Lys	Asp	Gly	Thr	Zhen et al., 2008	22892
PALAAYRL	ALAA	9446	3.1		Connective tissue growth factor	P29279	27-349	peptide-Ala180+Ala-peptide	P	NT	Pro	Ala	Leu	Ala	Ala	Tyr	Arg	Leu	Dean et al., 2007	20073
KPPRLVGG	PPRL	4532	11.01		cystatin C	P01034	27-146	peptide-Arg34+Leu-peptide	P	NT	Lys	Pro	Pro	Arg	Leu	Val	Gly	Gly	Dean et al., 2007	20220
DAASLKGL	AASL	436	29.09		decorin	P07585	31-359	peptide-Ser240+Leu-peptide	P		Asp	Ala	Ala	Ser	Leu	Lys	Gly	Leu	Imai et al., 1997	18359
FMLEDEAS	MLED	127983	0		Decorin precursor	P07585	17-359	peptide-Glu30+Asp-peptide	P	NT	Phe	Met	Leu	Glu	Asp	Glu	Ala	Ser	Imai et al., 1997
DRGELADS	RGEL	3096	15		Dentin matrix acidic phosphoprotein 1	P98193	17-489	peptide-Glu260+Leu-peptide	P	AB	Asp	Arg	Gly	Glu	Leu	Ala	Asp	Ser	Chaussain et al., 2009
SNESLSLS	NESL	59474	0.08		Dentin matrix acidic phosphoprotein 1	P98193	17-489	peptide-Ser380+Leu-peptide	P	AB	Ser	Asn	Glu	Ser	Leu	Ser	Leu	Ser	Chaussain et al., 2009
ESLSLSEE	SLSL	56026	0.09		Dentin matrix acidic phosphoprotein 1	P98193	17-489	peptide-Ser382+Leu-peptide	P	AB	Glu	Ser	Leu	Ser	Leu	Ser	Glu	Glu	Chaussain et al., 2009
IPGESRSQ	PGES	77128	0.04		DSPP600	Q6YBV4	1-600	peptide-Glu344+Ser-peptide	P		Ile	Pro	Gly	Glu	Ser	Arg	Ser	Gln	Yamakoshi et al., 2006	20088
EPLAIGKS	PLAI	58	33.76		DSPP600	Q6YBV4	1-600	peptide-Ala376+Ile-peptide	P		Glu	Pro	Leu	Ala	Ile	Gly	Lys	Ser	Yamakoshi et al., 2006	20089
FTSQVLAH	TSQV	78326	0.04		Eotaxin	P48298	24-97	peptide-Gln20+Val-peptide	P	NT	Phe	Thr	Ser	Gln	Val	Leu	Ala	His	Greenlee et al., 2006
YKSELREQ	KSEL	4754	10.41		EPHB1	P54762	18-540	peptide-Glu534+Leu-peptide	P		Tyr	Lys	Ser	Glu	Leu	Arg	Glu	Gln	Chen et al., 2002	18286
ITGLTILN	TGLT	34691	0.24		fibrillin-2	P35556	29-2911	peptide-Leu488+Thr-peptide	P		Ile	Thr	Gly	Leu	Thr	Ile	Leu	Asn	Hindson et al., 1999	18423
IITGLTIL	ITGL	7648	4.83		fibrillin-2	P35556	29-2911	peptide-Gly487+Leu-peptide	P		Ile	Ile	Thr	Gly	Leu	Thr	Ile	Leu	Hindson et al., 1999	18425
PFSPLVAT	FSPL	3161	14.78		fibronectin	P02751	32-2386	peptide-Pro720+Leu-peptide	P	NT	Pro	Phe	Ser	Pro	Leu	Val	Ala	Thr	Doucet & Overall, 2010
DVRAAVYQ	VRAA	11612	1.98		fibronectin	P02751	32-2386	peptide-Ala291+Ala-peptide	P	NT	Asp	Val	Arg	Ala	Ala	Val	Tyr	Gln	Doucet & Overall, 2010
TVSHYAVG	VSHY	1506	21.33		fibronectin	P02751	32-2386	peptide-His2214+Tyr-peptide	P	NT	Thr	Val	Ser	His	Tyr	Ala	Val	Gly	Doucet & Overall, 2010
HPIQWNAP	PIQW	5694	8.26		fibronectin	P02751	32-2386	peptide-Gln629+Trp-peptide	P	NT	His	Pro	Ile	Gln	Trp	Asn	Ala	Pro	Doucet & Overall, 2010
AVSQSKPG	VSQS	59158	0.08		fibronectin	P02751	32-2386	peptide-Gln47+Ser-peptide	P	MS	Ala	Val	Ser	Gln	Ser	Lys	Pro	Gly	Doucet & Overall, 2010
YQGWMMVD	QGWM	9597	3		fibronectin	P02751	32-2386	peptide-Trp208+Met-peptide	P	MS	Tyr	Gln	Gly	Trp	Met	Met	Val	Asp	Doucet & Overall, 2010
PPTNLHLE	PTNL	261	31.03		fibronectin	P02751	32-2386	peptide-Asn1179+Leu-peptide	P	MS	Pro	Pro	Thr	Asn	Leu	His	Leu	Glu	Doucet & Overall, 2010
NVSVYTVK	VSVY	21327	0.61		fibronectin	P02751	32-2386	peptide-Val1247+Tyr-peptide	P	MS	Asn	Val	Ser	Val	Tyr	Thr	Val	Lys	Doucet & Overall, 2010
KPSQMQVT	PSQM	630	27.24		fibronectin	P02751	32-2386	peptide-Gln1547+Met-peptide	P	MS	Lys	Pro	Ser	Gln	Met	Gln	Val	Thr	Doucet & Overall, 2010
VNEGLNQP	NEGL	43650	0.16		fibronectin	P02751	32-2386	peptide-Gly2197+Leu-peptide	P	MS	Val	Asn	Glu	Gly	Leu	Asn	Gln	Pro	Doucet & Overall, 2010
QPLVQTAV	PLVQ	16045	1.04		fibronectin	P02751	32-2386	peptide-Val1625+Gln-peptide	P	MS	Gln	Pro	Leu	Val	Gln	Thr	Ala	Val	Doucet & Overall, 2010
QHLGMTKC	HLGM	10485	2.43		fractalkine	O35188	25-395	peptide-Gly28+Met-peptide	P		Gln	His	Leu	Gly	Met	Thr	Lys	Cys	Dean & Overall, 2007	20297
QAAALTKN	AAAL	238	31.4		fractalkine	O35188	25-395	peptide-Ala95+Leu-peptide	P		Gln	Ala	Ala	Ala	Leu	Thr	Lys	Asn	Dean & Overall, 2007	20298
KPGECLRV	PGEC	42940	0.16		galectin-1	P09382	2-135	peptide-Glu16+Cys-peptide	P		Lys	Pro	Gly	Glu	Cys	Leu	Arg	Val	Dean & Overall, 2007	20293
IKCVAFDG	KCVA	107348	0		galectin-1	P09382	2-135	peptide-Val132+Ala-peptide	P		Ile	Lys	Cys	Val	Ala	Phe	Asp	Gly	Dean & Overall, 2007	20294
PPGAYHGA	PGAY	614	27.42		galectin-3	P17931	2-250	peptide-Ala62+Tyr-peptide	P		Pro	Pro	Gly	Ala	Tyr	His	Gly	Ala	Ochieng et al., 1994	18106
GPHLLVEA	PHLL	2646	16.48		hyaluronan and proteoglycan link protein 1	P10915	16-354	peptide-Leu40+Leu-peptide	P		Gly	Pro	His	Leu	Leu	Val	Glu	Ala	Nguyen et al., 1993	3230
RAIHIQAE	AIHI	7766	4.71		hyaluronan and proteoglycan link protein 1	P10915	16-354	peptide-His31+Ile-peptide	P		Arg	Ala	Ile	His	Ile	Gln	Ala	Glu	Nguyen et al., 1993	18126
LRAYLLPA	RAYL	16287	1.01		insulin-like growth factor binding protein 3	P17936	28-291	peptide-Tyr126+Leu-peptide	P		Leu	Arg	Ala	Tyr	Leu	Leu	Pro	Ala	Fowlkes et al., 1994	3228
SRLRAYLL	RLRA	19308	0.73		insulin-like growth factor binding protein 3	P17936	28-291	peptide-Arg124+Ala-peptide	P		Ser	Arg	Leu	Arg	Ala	Tyr	Leu	Leu	Gibson & Cohen, 1999
HPLHSKII	PLHS	3633	13.4		insulin-like growth factor binding protein 3	P17936	28-291	peptide-His169+Ser-peptide	P		His	Pro	Leu	His	Ser	Lys	Ile	Ile	Gibson & Cohen, 1999
VSRLRAYL	SRLR	55202	0.09		insulin-like growth factor binding protein 3	P17936	28-291	peptide-Leu123+Arg-peptide	P		Val	Ser	Arg	Leu	Arg	Ala	Tyr	Leu	Fowlkes et al., 1994
FHPLHSKI	HPLH	32962	0.27		insulin-like growth factor binding protein 3	P17936	28-291	peptide-Leu168+His-peptide	P		Phe	His	Pro	Leu	His	Ser	Lys	Ile	Fowlkes et al., 1994
GPYELKAL	PYEL	1788	19.91		Interleukin-1 beta	P01584	117-269	peptide-Glu141+Leu-peptide	P	NT	Gly	Pro	Tyr	Glu	Leu	Lys	Ala	Leu	Ito et al., 1996	3226
NMGSLSVK	MGSL	452	28.9		laminin subunit alpha-1	P19137	25-3084	peptide-Ser2222+Leu-peptide	P	MS	Asn	Met	Gly	Ser	Leu	Ser	Val	Lys	Doucet & Overall, 2010
APTGSYSD	PTGS	78410	0.04		laminin subunit alpha-1	P19137	25-3084	peptide-Gly2583+Ser-peptide	P	MS	Ala	Pro	Thr	Gly	Ser	Tyr	Ser	Asp	Doucet & Overall, 2010
MMAGMASQ	MAGM	1484	21.45		laminin subunit gamma-1	P02468	34-1607	peptide-Gly1488+Met-peptide	P	MS	Met	Met	Ala	Gly	Met	Ala	Ser	Gln	Doucet & Overall, 2010
TAAALTSC	AAAL	238	31.4		laminin subunit gamma-2	Q61092	22-1191	peptide-Ala606+Leu-peptide	P		Thr	Ala	Ala	Ala	Leu	Thr	Ser	Cys	Giannelli et al., 1997	17949
APSSVIAA	PSSV	1685	20.49		C-X-C motif chemokine 5	P50228	41-132	Ala-Pro-Ser-Ser44+Val-peptide	P	NT	Ala	Pro	Ser	Ser	Val	Ile	Ala	Ala	Tester et al., 2007
GPPGSVGA	PPGS	52284	0.1		mannose-binding protein A	P19999	18-238	peptide-Gly68+Ser-peptide	P		Gly	Pro	Pro	Gly	Ser	Val	Gly	Ala	Butler et al., 2002	18567
KLANMEAE	LANM	236	31.41		mannose-binding protein A	P19999	18-238	peptide-Asn97+Met-peptide	P		Lys	Leu	Ala	Asn	Met	Glu	Ala	Glu	Butler et al., 2002	18568
GPPGKLGP	PPGK	45917	0.14		mannose-binding protein A	P19999	18-238	peptide-Gly62+Lys-peptide	P		Gly	Pro	Pro	Gly	Lys	Leu	Gly	Pro	Butler et al., 2002	18565
GPKGQKGD	PKGQ	1487	21.45		mannose-binding protein A	P19999	18-238	peptide-Gly80+Gln-peptide	P		Gly	Pro	Lys	Gly	Gln	Lys	Gly	Asp	Butler et al., 2002	18564
DVGEYNVF	VGEY	3547	13.68		matrix metallopeptidase-13	P45452	20-471	peptide-Glu103+Tyr-peptide	P		Asp	Val	Gly	Glu	Tyr	Asn	Val	Phe	Knauper et al., 1996	17962
DVANYNFF	VANY	578	27.75		matrix metallopeptidase-2	P08253	30-660	peptide-Asn80+Tyr-peptide	P		Asp	Val	Ala	Asn	Tyr	Asn	Phe	Phe	Crabbe et al., 1993	16542
DLGRFQTF	LGRF	3427	13.99		matrix metallopeptidase-9	P14780	20-707	peptide-Arg106+Phe-peptide	P		Asp	Leu	Gly	Arg	Phe	Gln	Thr	Phe	Fridman et al., 1995	21333
RVAEMRGE	VAEM	1857	19.66		matrix metallopeptidase-9	P14780	20-707	peptide-Glu59+Met-peptide	P		Arg	Val	Ala	Glu	Met	Arg	Gly	Glu	Fridman et al., 1995	21334
PPGDLRTH	PGDL	1826	19.78		membrane-type matrix metallopeptidase-1 precursor	P50281	21-582	peptide-Asp49+Leu-peptide	P		Pro	Pro	Gly	Asp	Leu	Arg	Thr	His	Golubkov et al., 2007
SPQSLSAA	PQSL	69	33.51		membrane-type matrix metallopeptidase-1 precursor	P50281	21-582	peptide-Ser60+Leu-peptide	P		Ser	Pro	Gln	Ser	Leu	Ser	Ala	Ala	Golubkov et al., 2007
NSFGLRFG	SFGL	39283	0.19		metastasis-suppressor KiSS-1	Q15726	20-145	peptide-Gly118+Leu-peptide	P		Asn	Ser	Phe	Gly	Leu	Arg	Phe	Gly	Takino et al., 2003	16541
GSKYLATA	SKYL	7943	4.49		myelin basic protein isoform 1	P02686	135-304	peptide-Tyr15+Leu-peptide	P	MS	Gly	Ser	Lys	Tyr	Leu	Ala	Thr	Ala	Shiryaev et al., 2009	25381
VHFFKNIV	HFFK	45793	0.14		myelin basic protein isoform 1	P02686	135-304	peptide-Phe91+Lys-peptide	P	MS	Val	His	Phe	Phe	Lys	Asn	Ile	Val	Shiryaev et al., 2009	25384
FFKNIVTP	FKNI	45989	0.14		myelin basic protein isoform 1	P02686	135-304	peptide-Asn93+Ile-peptide	P	MS	Phe	Phe	Lys	Asn	Ile	Val	Thr	Pro	Shiryaev et al., 2009	25383
IVTPRTPP	VTPR	40652	0.18		myelin basic protein isoform 1	P02686	135-304	peptide-Pro97+Arg-peptide	P	MS	Ile	Val	Thr	Pro	Arg	Thr	Pro	Pro	Shiryaev et al., 2009	25385
KGRGLSLS	GRGL	7536	4.98		myelin basic protein isoform 1	P02686	135-304	peptide-Gly109+Leu-peptide	P	MS	Lys	Gly	Arg	Gly	Leu	Ser	Leu	Ser	Shiryaev et al., 2009	25388
RGLSLSRF	GLSL	39908	0.18		myelin basic protein isoform 1	P02686	135-304	peptide-Ser111+Leu-peptide	P	MS	Arg	Gly	Leu	Ser	Leu	Ser	Arg	Phe	Shiryaev et al., 2009	25389
RASDYKSA	ASDY	18627	0.78		myelin basic protein isoform 1	P02686	135-304	peptide-Asp134+Tyr-peptide	P	MS	Arg	Ala	Ser	Asp	Tyr	Lys	Ser	Ala	Shiryaev et al., 2009	25390
TLSKIFKL	LSKI	7909	4.52		myelin basic protein isoform 1	P02686	135-304	peptide-Lys153+Ile-peptide	P	MS	Thr	Leu	Ser	Lys	Ile	Phe	Lys	Leu	Shiryaev et al., 2009	25391
DPGNRPHL	PGNR	49305	0.12		myelin basic protein isoform 1	P04370	1-246	peptide-Asn87+Arg-peptide	P	MS	Asp	Pro	Gly	Asn	Arg	Pro	His	Leu	Shiryaev et al., 2009	25543
ESDELQTI	SDEL	132868	0		myelin basic protein isoform 1	P04370	1-246	peptide-Glu116+Leu-peptide	P	MS	Glu	Ser	Asp	Glu	Leu	Gln	Thr	Ile	Shiryaev et al., 2009	25544
DPTAASGG	PTAA	24708	0.46		myelin basic protein isoform 1	P04370	1-246	peptide-Ala126+Ala-peptide	P	MS	Asp	Pro	Thr	Ala	Ala	Ser	Gly	Gly	Shiryaev et al., 2009	25545
GSLPQKSQ	SLPQ	23393	0.51		myelin basic protein isoform 1	P04370	1-246	peptide-Pro203+Gln-peptide	P	MS	Gly	Ser	Leu	Pro	Gln	Lys	Ser	Gln	Shiryaev et al., 2009	25546
SIGRFFGG	IGRF	3460	13.9		myelin basic protein isoform 1	P02686	135-304	peptide-Arg44+Phe-peptide	P	MS	Ser	Ile	Gly	Arg	Phe	Phe	Gly	Gly	Shiryaev et al., 2009	25547
LPRHRDTG	PRHR	73230	0.04		myelin basic protein isoform 1	P02686	135-304	peptide-His166+Arg-peptide	P	MS	Leu	Pro	Arg	His	Arg	Asp	Thr	Gly	Shiryaev et al., 2009
SVGKLSQT	VGKL	1553	21.06		myelin basic protein isoform 2	P04370-2	1-190	peptide-Lys34+Leu-peptide	P	MS	Ser	Val	Gly	Lys	Leu	Ser	Gln	Thr	Shiryaev et al., 2009	25422
QGAHPADP	GAHP	86450	0		myelin basic protein isoform 2	P04370-2	1-190	peptide-His81+Pro-peptide	P	MS	Gln	Gly	Ala	His	Pro	Ala	Asp	Pro	Shiryaev et al., 2009	25423
VMASQKRP	MASQ	2583	16.7		myelin basic protein isoform 2	P04370-2	1-190	peptide-Ser136+Gln-peptide	P	MS	Val	Met	Ala	Ser	Gln	Lys	Arg	Pro	Shiryaev et al., 2009	25424
RSKYLATA	SKYL	7943	4.49		myelin basic protein isoform 2	P04370-2	1-190	peptide-Tyr146+Leu-peptide	P	MS	Arg	Ser	Lys	Tyr	Leu	Ala	Thr	Ala	Shiryaev et al., 2009	25425
CINYEAFV	INYE	107292	0		myosin light chain 1, skeletal muscle isoform	P02602	2-192	peptide-Tyr181+Glu-peptide	P		Cys	Ile	Asn	Tyr	Glu	Ala	Phe	Val	Sawicki et al., 2005	20300
ELTPVVQD	LTPV	31249	0.3		plasminogen	P00747	20-810	peptide-Pro372+Val-peptide	P	NT	Glu	Leu	Thr	Pro	Val	Val	Gln	Asp	Cornelius et al., 1998
LFEKKVYL	FEKK	137356	0		plasminogen	P00747	20-810	peptide-Lys96+Lys-peptide	P	NT	Leu	Phe	Glu	Lys	Lys	Val	Tyr	Leu	Cornelius et al., 1998
KPKPQAES	PKPQ	2971	15.31		Pleiotrophin	P63089	33-168	peptide-Pro149+Gln-peptide	P	NT	Lys	Pro	Lys	Pro	Gln	Ala	Glu	Ser	Dean et al., 2007
IPCNWKKQ	PCNW	107994	0		Pleiotrophin	P63089	33-168	peptide-Asn90+Trp-peptide	P	NT	Ile	Pro	Cys	Asn	Trp	Lys	Lys	Gln	Dean et al., 2007
QLGTYNVI	LGTY	6426	6.75		pregnancy zone protein	P20742	26-1482	peptide-Thr718+Tyr-peptide	P		Gln	Leu	Gly	Thr	Tyr	Asn	Val	Ile	Arbelez et al., 1997	3222
LPSLQMAD	PSLQ	6015	7.65		prolactin	P01236	29-227	peptide-Leu184+Gln-peptide	P		Leu	Pro	Ser	Leu	Gln	Met	Ala	Asp	Macotela et al., 2006	21574
APEAILSK	PEAI	1302	22.52		prolactin	P01236	29-227	peptide-Ala139+Ile-peptide	P		Ala	Pro	Glu	Ala	Ile	Leu	Ser	Lys	Macotela et al., 2006
NYSNIQGN	YSNI	3195	14.68		Protein S100-A8	P27005	1989-02-01	peptide-Asn21+Ile-peptide	P	NT	Asn	Tyr	Ser	Asn	Ile	Gln	Gly	Asn	Greenlee et al., 2006
GPVPVRAI	PVPV	1229	23.04		protein-glutamine gamma-glutamyltransferase 2 isoform a	P21980	2-687	peptide-Pro375+Val-peptide	P		Gly	Pro	Val	Pro	Val	Arg	Ala	Ile	Belkin et al., 2004	18839
AFTRANHL	FTRA	33255	0.26		protein-glutamine gamma-glutamyltransferase 2 isoform a	P21980	2-687	peptide-Arg458+Ala-peptide	P		Ala	Phe	Thr	Arg	Ala	Asn	His	Leu	Belkin et al., 2004	18840
RANHLNKL	ANHL	4812	10.28		protein-glutamine gamma-glutamyltransferase 2 isoform a	P21980	2-687	peptide-His461+Leu-peptide	P		Arg	Ala	Asn	His	Leu	Asn	Lys	Leu	Belkin et al., 2004	18841
GPGGAWAA	PGGA	80293	0		serum amyloid A-2 protein	P0DJI9	19-122	peptide-Gly69+Ala-peptide	P	MS	Gly	Pro	Gly	Gly	Ala	Trp	Ala	Ala	Stix et al., 2001	3232
GANPVQVE	ANPV	75853	0.04		SPARC	P09486	18-303	peptide-Pro47+Val-peptide	P		Gly	Ala	Asn	Pro	Val	Gln	Val	Glu	Sasaki et al., 1997	18252
TVAEVTEV	VAEV	27123	0.39		SPARC	P09486	18-303	peptide-Glu37+Val-peptide	P		Thr	Val	Ala	Glu	Val	Thr	Glu	Val	Sasaki et al., 1997	18251
HPVELLAR	PVEL	838	25.47		SPARC	P09486	18-303	peptide-Glu214+Leu-peptide	P		His	Pro	Val	Glu	Leu	Leu	Ala	Arg	Sasaki et al., 1997	18253
ELAPLRAP	LAPL	227	31.56		SPARC	P09486	18-303	peptide-Pro254+Leu-peptide	P		Glu	Leu	Ala	Pro	Leu	Arg	Ala	Pro	Sasaki et al., 1997	18262
KPVSLSYR	PVSL	147	32.5		stromal cell-derived factor 1	P48061	22-93	peptide-Ser25+Leu-peptide	P		Lys	Pro	Val	Ser	Leu	Ser	Tyr	Arg	McQuibban et al., 2001	19711
EPTGLEAT	PTGL	94	33.11		syndecan-1	P18827	23-310	peptide-Gly82+Leu-peptide	P	NT	Glu	Pro	Thr	Gly	Leu	Glu	Ala	Thr	Manon-Jensen et al., 2013
EPKKLEEN	PKKL	5768	8.1		syndecan-4	P31431	19-198	peptide-Lys105+Leu-peptide	P	NT	Glu	Pro	Lys	Lys	Leu	Glu	Glu	Asn	Manon-Jensen et al., 2013
LEGRYFSG	EGRY	19264	0.73		syndecan-4	P31431	19-198	peptide-Arg36+Tyr-peptide	P	NT	Leu	Glu	Gly	Arg	Tyr	Phe	Ser	Gly	Manon-Jensen et al., 2013
EGRYFSGA	GRYF	81879	0		syndecan-4	P31431	19-198	peptide-Tyr37+Phe-peptide	P	NT	Glu	Gly	Arg	Tyr	Phe	Ser	Gly	Ala	Manon-Jensen et al., 2013
PLAVEVVT	LAVE	86514	0		tenascin	P24821	23-2201	peptide-Val1340+Glu-peptide	P		Pro	Leu	Ala	Val	Glu	Val	Val	Thr	Siri et al., 1995	18416
ATDVTTTP	TDVT	120005	0		versican core protein	P13611	21-3396	peptide-Val1402+Thr-peptide	P		Ala	Thr	Asp	Val	Thr	Thr	Thr	Pro		20225

## Sheet: B.MMP2 all substr from MEROPS
S17 Table. (B) Tetramer annotation of MMP-2 cleavage sites in all substrates collected in MEROPS database
MEROPS octamers	tetramer sequence	Relative probability (RP) rank	relative probability (RP)		Merops annotation:	Substrate	Uniprot	Residue range	Cleavage Site	Cleavage type	Evidence	P4	P3	P2	P1	P1'	P2'	P3'	P4'	Reference	CutDB
--AAAAAA	-AAA					lamin-B1	P20700	139-160	peptide-Ala141+Leu-peptide	N	MS	-	-	Ala	Ala	Leu	Asn	Ser	Lys	Schilling & Overall, 2008
AAAALINF	AAAL	238	31.4			cDNA FLJ14373 fis, clone HEMBA1001595, highly similar to SEPTIN 2 HOMOLOG	Q96KC0	231-250	AAAQ+LLQSQAQQSGAQQTK	N	MS	Ala	Ala	Ala	Gln	Leu	Leu	Gln	Ser	Schilling & Overall, 2008
AAAELSAK	AAEL	2913	15.51			talin-1	Q9Y490	1241-1261	LNEAAAG+LNQAATELVQASR	N	MS	Ala	Ala	Ala	Gly	Leu	Asn	Gln	Ala	Schilling & Overall, 2008
AAAGLNQA	AAGL	404	29.36			Protein disulfide-isomerase	P09103	20-509	peptide-Lys71+Leu-peptide	N	MS	Ala	Ala	Ala	Lys	Leu	Lys	Ala	Glu	auf dem Keller et al., 2010
AAAKLKAE	AAKL	3259	14.55			CSDA protein variant	Q59EB5	2020-01-20	AAAAS+LATAAGSEDAEKKVL	N	MS	Ala	Ala	Ala	Ser	Leu	Ala	Thr	Ala	Schilling & Overall, 2008
-AAALATV	AAAL	238	31.4			STIP1 protein	Q3ZCU9	481-493	AAA+LEAMKDYTK	N	MS	-	Ala	Ala	Ala	Leu	Glu	Ala	Met	Schilling & Overall, 2008
-AAALEAM	AAAL	238	31.4			stress-induced-phosphoprotein 1	Q5TZU9	434-446	AAA+LEAMKDYTK	N	MS	-	Ala	Ala	Ala	Leu	Glu	Ala	Met	Schilling & Overall, 2008
-AAALEFL	AAAL	238	31.4			vimentin	P08670	354-368	AAN+YQDTIGRLQDE	N	MS	-	Ala	Ala	Asn	Tyr	Gln	Asp	Thr	Schilling & Overall, 2008
AAAQLLQS	AAQL	2103	18.59			parathymosin	Q9D0J8	2-101	peptide-Glu11+Leu-peptide	N	MS	Ala	Ala	Ala	Glu	Leu	Ser	Ala	Lys	Kleifeld et al., 2010
AAASLATA	AASL	436	29.09			cDNA FLJ14373 fis, clone HEMBA1001595, highly similar to SEPTIN 2 HOMOLOG	Q96KC0	231-250	AAAQL+LQSQAQQSGAQQTK	N	MS	Ala	Ala	Gln	Leu	Leu	Gln	Ser	Gln	Schilling & Overall, 2008
-AAELIAN	AAEL	2913	15.51			glyceraldehyde-3-phosphate dehydrogenase	P04406	212-228	AAK+AVGKVIPELNGKL	N	MS	-	Ala	Ala	Lys	Ala	Val	Gly	Lys	Schilling & Overall, 2008
AAINLTDP	AINL	2640	16.51			Platelet-activating factor acetylhydrolase IB subunit beta	Q61206	1-229	peptide-Pro12+His-peptide	N	MS	Ala	Ala	Ile	Pro	His	Ala	Ala	Glu	auf dem Keller et al., 2010
AAIPHAAE	AIPH	43879	0.15			Dihydrolipoyl dehydrogenase, mitochondrial	O08749	36-509	peptide-Ala470+Leu-peptide	N	MS	Ala	Ala	Leu	Ala	Leu	Glu	Tyr	Gly	auf dem Keller et al., 2010
-AAKAVGK	AAKA	26204	0.41			FACT complex subunit SPT16	Q9Y5B9	185-196	AAS+ITSEVFNK	N	MS	-	Ala	Ala	Ser	Ile	Thr	Ser	Glu	Schilling & Overall, 2008
AAKNLQEA	AKNL	2584	16.7			14-3-3 protein gamma	P61982	2-247	peptide-Lys28+Asn-peptide	N	MS	Ala	Ala	Met	Lys	Asn	Val	Thr	Glu	auf dem Keller et al., 2010
AAKNQVAM	AKNQ	84852	0			Vimentin	P20152	2-466	peptide-Asn283+Leu-peptide	N	MS	Ala	Ala	Lys	Asn	Leu	Gln	Glu	Ala	Prudova et al., 2010
AALALEYG	ALAL	1368	22.12			heat shock cognate 71 kDa protein	P63017	2-646	peptide-Asn57+Gln-peptide	N	MS	Ala	Ala	Lys	Asn	Gln	Val	Ala	Met	Kleifeld et al., 2010
--AALIQQ	-AAL					60S ribosomal protein L9	P32969	157-168	AA+LIQQATTVK	N	MS	-	-	Ala	Ala	Leu	Ile	Gln	Gln	Schilling & Overall, 2008
--AALNSK	-AAL					putative uncharacterized protein	Q2NKY6	157-168	AA+LIQQATTVK	N	MS	-	-	Ala	Ala	Leu	Ile	Gln	Gln	Schilling & Overall, 2008
--AALTRD	-AAL					Myosin-9 isoform 3	P35579-2	1176-1192	AN+LQIDQINTDLNLER	N	MS	-	-	Ala	Asn	Leu	Gln	Ile	Asp	Schilling & Overall, 2008
AAMKNVTE	AMKN	31837	0.29			Transitional endoplasmic reticulum ATPase	Q01853	2-806	peptide-Cys572+Val-peptide	N	MS	Ala	Ala	Pro	Cys	Val	Leu	Phe	Phe	auf dem Keller et al., 2010
-AANVTGP	AANV	9397	3.13			nuclease sensitive element binding protein-1	Q7KZ24	120-136	AAN+VTGPGGVPVQGSK	N	MS	-	Ala	Ala	Asn	Val	Thr	Gly	Pro	Schilling & Overall, 2008
-AANYQDT	AANY	2247	18			RcNSEP1	Q2VIK8	117-133	AAN+VTGPGGVPVQGSK	N	MS	-	Ala	Ala	Asn	Val	Thr	Gly	Pro	Schilling & Overall, 2008
AAPCVLFF	APCV	107828	0			proteasome subunit beta type-2	P49721	14-36	peptide-Asn24+Ile-peptide	N	MS	Ala	Ala	Ser	Asn	Ile	Val	Gln	Met	Schilling & Overall, 2008
AAQLLQSQ	AQLL	15437	1.13			ATP-dependent RNA helicase DDX19A	Q9NUU7	54-77	peptide-Ser59+Leu-peptide	N	MS	Ala	Ala	Gln	Ser	Leu	Leu	Asn	Lys	Schilling & Overall, 2008
AAQSLLNK	AQSL	2160	18.36			dynactin subunit 2	Q13561	161-182	peptide-Asn165+Leu-peptide	N	MS	Ala	Ala	Ile	Asn	Leu	Thr	Asp	Pro	Schilling & Overall, 2008
AASDIAMT	ASDI	42163	0.17			Eukaryotic translation initiation factor 4B	Q8BGD9	1-611	peptide-Ile360+Phe-peptide	N	MS	Ala	Ala	Ser	Ile	Phe	Gly	Gly	Ala	Prudova et al., 2010
AASIFGGA	ASIF	16353	1.01			probable phosphoglycerate mutase 4	Q8N0Y7	2020-01-13	AAYK+LVLIRHGE	N	MS	Ala	Ala	Tyr	Lys	Leu	Val	Leu	Ile	Schilling & Overall, 2008
-AASITSE	AASI	2649	16.47			cDNA FLJ45706 fis, clone FEBRA2028457, highly similar to Nucleolin	Q6ZS99	284-301	ART+LLAKNLPYKVTQDE	N	MS	-	Ala	Arg	Thr	Leu	Leu	Ala	Lys	Schilling & Overall, 2008
AASNIVQM	ASNI	2102	18.59			mitochondrial import inner membrane translocase subunit Tim16	Q9Y3D7	44-67	peptide-Asn50+Leu-peptide	N	MS	Ala	Ala	Ser	Asn	Leu	Ser	Gly	Leu	Schilling & Overall, 2008
AASNLSGL	ASNL	469	28.74			14-3-3 protein epsilon	P62259	1-255	peptide-Asp157+Ile-peptide	N	MS	Ala	Ala	Ser	Asp	Ile	Ala	Met	Thr	auf dem Keller et al., 2010
AAVALINA	AVAL	610	27.44			L-xylulose reductase	Q7Z4W1	69-97	peptide-Ala87+Leu-peptide	N	MS	Ala	Ala	Val	Ala	Leu	Leu	Gln	Pro	Schilling & Overall, 2008
AAVALLQP	AVAL	610	27.44			Vinculin	Q64727	2-1066	peptide-His492+Leu-peptide	N	MS	Ala	Ala	Val	His	Leu	Glu	Gly	Lys	auf dem Keller et al., 2010
AAVHLEGK	AVHL	2364	17.51			filamin-A	P21333	1007-1032	peptide-Pro1017+Cys-peptide	N	MS	Ala	Ala	Val	Pro	Cys	Lys	Val	Glu	Schilling & Overall, 2008
AAVPCKVE	AVPC	80071	0			Filamin A	A6NDY9	2315-01-01	peptide-Pro990+Cys-peptide	N	MS	Ala	Ala	Val	Pro	Cys	Lys	Val	Glu	Schilling & Overall, 2008
AAYKLVLI	AYKL	23895	0.49			phosphoglycerate mutase 1	P18669	2020-01-13	AAYK+LVLIRHGE	N	MS	Ala	Ala	Tyr	Lys	Leu	Val	Leu	Ile	Schilling & Overall, 2008
ACALLLLF	CALL	23511	0.51			14-3-3 protein zeta/delta	P63101	1-245	peptide-Lys27+Ser-peptide	N	MS	Ala	Cys	Met	Lys	Ser	Val	Thr	Glu	auf dem Keller et al., 2010
-ACGLVAS	ACGL	6921	5.88			cell division cycle 5-like protein	Q99459	365-389	peptide-Asn368+Leu-peptide	N	MS	-	Ala	Gln	Asn	Leu	Met	Ala	Leu	Schilling & Overall, 2008
--ACLISL	-ACL					14-3-3 protein zeta/delta	P63104	129-149	AE+VAAGDDKKGIVDQSQQAY	N	MS	-	-	Ala	Glu	Val	Ala	Ala	Gly	Schilling & Overall, 2008
ACMKSVTE	CMKS	82214	0			ras-related protein Rab-5C	P51148	92-111	GAQAA+IVVYDITNTDTFAR	N	MS	Ala	Gln	Ala	Ala	Ile	Val	Val	Tyr	Schilling & Overall, 2008
--ADCAVL	-ADC					Putative elongation factor 1-alpha-like 3	Q5VTE0	108-129	peptide-Asp110+Cys-peptide	N	MS	-	-	Ala	Asp	Cys	Ala	Val	Leu	Schilling & Overall, 2008
--ADFCII	-ADF					myosin-9	P35579	565-576	AD+FCIIHYAGK	N	MS	-	-	Ala	Asp	Phe	Cys	Ile	Ile	Schilling & Overall, 2008
--ADLINN	-ADL					heat shock protein HSP 90-beta 2, putative	Q58FF8	95-107	AD+LINNLGTIAK	N	MS	-	-	Ala	Asp	Leu	Ile	Asn	Asn	Schilling & Overall, 2008
--ADLKKA	-ADL					peptidyl-prolyl cis-trans isomerase	Q6FGM6	327-348	peptide-Asp329+Leu-peptide	N	MS	-	-	Ala	Asp	Leu	Lys	Lys	Ala	Schilling & Overall, 2008
AEAWLLGQ	EAWL	9762	2.87			H2A histone family, member Y isoform 2 variant	Q59FH0	71-91	NGPLEVAGAA+VSAGHGLPAK	N	MS	Ala	Gly	Ala	Ala	Val	Ser	Ala	Gly	Schilling & Overall, 2008
--AEVAAG	-AEV					14-3-3 protein eta	Q04917	134-154	AE+VASGEKKNSVVEASEAAY	N	MS	-	-	Ala	Glu	Val	Ala	Ser	Gly	Schilling & Overall, 2008
--AEVASG	-AEV					Tropomyosin alpha-4 chain	Q6IRU2	2-248	Ala-Gly3+Leu-peptide	N	MS	-	-	Ala	Gly	Leu	Asn	Ser	Leu	auf dem Keller et al., 2010
AFAFIQVP	FAFI	12042	1.83			72 kDa type IV collagenase	P08253	110-660	peptide-Pro197+Gly-peptide	P	MS	Ala	Phe	Ala	Pro	Gly	Thr	Gly	Val	auf dem Keller et al., 2010
AFAPGTGV	FAPG	57652	0.08			S-formylglutathione hydrolase	P10768	167-185	SVSAFAP+ICNPVLCPWGK	N	MS	Ala	Phe	Ala	Pro	Ile	Cys	Asn	Pro	Schilling & Overall, 2008
AFAPICNP	FAPI	6926	5.88			Transaldolase	Q93092	1-337	peptide-Trp296+Leu-peptide	N	MS	Ala	Phe	Arg	Trp	Leu	His	Asn	Glu	auf dem Keller et al., 2010
AFDSLLAG	FDSL	20432	0.66			protein-glutamine gamma-glutamyltransferase 2 isoform a	P21980	2-687	peptide-Arg458+Ala-peptide	P		Ala	Phe	Thr	Arg	Ala	Asn	His	Leu	Belkin et al., 2004	18840
AFNVINGG	FNVI	93706	0			gamma-enolase	P09104	143-167	peptide-Val152+Ile-peptide	N	MS	Ala	Phe	Asn	Val	Ile	Asn	Gly	Gly	Schilling & Overall, 2008
AFRWLHNE	FRWL	3745	13.07			beta-enolase	P13929	143-167	peptide-Val152+Ile-peptide	N	MS	Ala	Phe	Asn	Val	Ile	Asn	Gly	Gly	Schilling & Overall, 2008
AFTRANHL	FTRA	33255	0.26			60S acidic ribosomal protein P2	P05387	61-98	peptide-Ala84+Gly-peptide	N	MS	Ala	Pro	Ala	Ala	Gly	Ser	Ala	Pro	Schilling & Overall, 2008
AGAAVSAG	GAAV	58370	0.08			H2A histone family, member Y isoform 2 variant	Q59FH0	75-92	E+VAGAAVSAGHGLPAKF	N	MS	-	-	-	Glu	Val	Ala	Gly	Ala	Schilling & Overall, 2008
AGAHLQGG	GAHL	5609	8.46			UV excision repair protein RAD23 homolog B	P54727	37-61	peptide-Lys45+Leu-peptide	N	MS	Ala	Gly	Gln	Lys	Leu	Ile	Tyr	Ala	Schilling & Overall, 2008
AGANISTW	GANI	8471	3.88			glyceraldehyde-3-phosphate dehydrogenase	P04406	106-138	peptide-His111+Leu-peptide	N	MS	Ala	Gly	Ala	His	Leu	Gln	Gly	Gly	Schilling & Overall, 2008
AGGEIRGD	GGEI	72539	0.05			period circadian protein homolog 1	O15534	996-1016	GAAVAGGP+GSSAGPPPPSAE	N	MS	Ala	Gly	Gly	Pro	Gly	Ser	Ser	Ala	Schilling & Overall, 2008
AGGPGSSA	GGPG	43725	0.15			glyceraldehyde-3-phosphate dehydrogenase	P04406	271-309	peptide-Ala302+Leu-peptide	N	MS	Ala	Gly	Ile	Ala	Leu	Asn	Asp	His	Schilling & Overall, 2008
AGIALNDH	GIAL	19809	0.7			histidyl-tRNA synthetase, cytoplasmic	P12081	447-472	peptide-Pro461+Leu-peptide	N	MS	Ala	Gly	Ile	Pro	Leu	Val	Ala	Ile	Schilling & Overall, 2008
AGIPLVAI	GIPL	16117	1.03			elongation factor 2	P13639	773-792	SQVAGTP+MFVVKAYLPVNE	N	MS	Ala	Gly	Thr	Pro	Met	Phe	Val	Val	Schilling & Overall, 2008
--AGLNSL	-AGL					heat repeat-containing protein 1	Q9H583	66-78	AP+LFSQLAKTLE	N	MS	-	-	Ala	Pro	Leu	Phe	Ser	Gln	Schilling & Overall, 2008
AGQKLIYA	GQKL	106632	0			dCTP pyrophosphatase 1	Q9H773	2020-01-23	peptide-Glu7+Ile-peptide	N	MS	Ala	Gly	Gly	Glu	Ile	Arg	Gly	Asp	Schilling & Overall, 2008
AGTPMFVV	GTPM	36966	0.21			creatine kinase B-type	P12277	22-37	LSAHNN+HMAKVLTPE	N	MS	Ala	His	Asn	Asn	His	Met	Ala	Lys	Schilling & Overall, 2008
AHGNFQYD	HGNF	4306	11.65			cell proliferation-inducing protein 52	B1H0U5	226-264	peptide-Asn254+Ile-peptide	N	MS	Ala	His	Ser	Asn	Ile	Leu	Lys	Ala	Schilling & Overall, 2008
AHNNHMAK	HNNH	148517	0			Reticulocalbin-3	Q8BH97	21-328	peptide-Asn51+Phe-peptide	N	MS	Ala	His	Gly	Asn	Phe	Gln	Tyr	Asp	auf dem Keller et al., 2010
AHSNILKA	HSNI	2383	17.43			cDNA, FLJ92546, highly similar to Homo sapiens inner membrane protein, mitochondrial	B2R5N6	226-264	peptide-Asn254+Ile-peptide	N	MS	Ala	His	Ser	Asn	Ile	Leu	Lys	Ala	Schilling & Overall, 2008
AHSSMVGV	HSSM	2892	15.58			U2 small nuclear ribonucleoprotein A'	P57784	2-255	peptide-Asn210+Ala-peptide	N	MS	Ala	Ile	Ala	Asn	Ala	Ser	Thr	Leu	auf dem Keller et al., 2010
AIAELGIY	IAEL	853	25.36			splicing factor U2AF 65 kDa subunit	P26368	300-329	peptide-Gly319+Leu-peptide	N	MS	Ala	Ile	Ala	Gly	Leu	Asn	Gly	Met	Schilling & Overall, 2008
AIAGLNGM	IAGL	120	32.83			vitellogenic carboxypeptidase-like protein	Q9H3G5	203-225	peptide-His215+Leu-peptide	N	MS	Ala	Ile	Ala	His	Leu	Ile	His	Ser	Schilling & Overall, 2008
AIAHLIHS	IAHL	106	32.93			Ran-specific GTPase-activating protein	P34022	2-203	peptide-Phe142+Leu-peptide	N	MS	Ala	Ile	Arg	Phe	Leu	Asn	Ala	Glu	auf dem Keller et al., 2010
AIANASTL	IANA	3550	13.67			ATP synthase subunit beta, mitochondrial precursor	P06576	387-406	AIAE+LGIYPAVDPLDSTSR	N	MS	Ala	Ile	Ala	Glu	Leu	Gly	Ile	Tyr	Schilling & Overall, 2008
AIGLLVAI	IGLL	864	25.3			DNA replication licensing factor MCM5	P33992	682-696	FAIGS+QVSEHSIIK	N	MS	Ala	Ile	Gly	Ser	Gln	Val	Ser	Glu	Schilling & Overall, 2008
AIGSQVSE	IGSQ	4515	11.05			Jab1/MPN domain metalloenzyme	Q92905	313-325	AIHG+LMSQVIKD	N	MS	Ala	Ile	His	Gly	Leu	Met	Ser	Gln	Schilling & Overall, 2008
AIHGLMSQ	IHGL	11660	1.96			phosphoglycerate mutase 1	P18669	195-222	peptide-Glu207+Leu-peptide	N	MS	Ala	Ile	Met	Glu	Leu	Asn	Leu	Pro	Schilling & Overall, 2008
AIMELNLP	IMEL	11493	2.03			probable phosphoglycerate mutase 4	Q8N0Y7	195-222	peptide-Glu207+Leu-peptide	N	MS	Ala	Ile	Met	Glu	Leu	Asn	Leu	Pro	Schilling & Overall, 2008
AINGIVFL	INGI	36921	0.21			galectin-1	P16045	2-135	peptide-Tyr120+Met-peptide	N	MS	Ala	Ile	Asn	Tyr	Met	Ala	Ala	Asp	Kleifeld et al., 2010
AINYMAAD	INYM	7748	4.72			ubiquitinyl hydrolase-L1	P09936	135-153	NEAIQA+AHDAVAQEGQCR	N	MS	Ala	Ile	Gln	Ala	Ala	His	Asp	Ala	Schilling & Overall, 2008
AIPGLAGA	IPGL	16339	1.01			ATP-citrate synthase	Q91V92	1-1091	peptide-Glu8+Gln-peptide	N	MS	Ala	Ile	Ser	Glu	Gln	Thr	Gly	Lys	Kleifeld et al., 2010
AIQAAHDA	IQAA	16660	0.97			eukaryotic translation initiation factor 1	P41567	2020-02-18	AIQN+LHSFDPFADASK	N	MS	Ala	Ile	Gln	Asn	Leu	His	Ser	Phe	Schilling & Overall, 2008
AIQNLHSF	IQNL	590	27.59			protein S100-A6	P06703	2020-01-18	ACPLDQAIGL+LVAIFHK	N	MS	Ala	Ile	Gly	Leu	Leu	Val	Ala	Ile	Schilling & Overall, 2008
AIRFLNAE	IRFL	4130	12.1			GTP-binding protein SAR1a	Q9NR31	87-107	NYLPAING+IVFLVDCADHSR	N	MS	Ala	Ile	Asn	Gly	Ile	Val	Phe	Leu	Schilling & Overall, 2008
AISELFAK	ISEL	1054	24.18			calpastatin isoform 4	P20810-4	493-517	peptide-Glu500+Val-peptide	N	MS	Ala	Ile	Ser	Glu	Val	Val	Ser	Gln	Schilling & Overall, 2008
AISEQTGK	ISEQ	13240	1.52			Nucleolin	P09405	2-707	peptide-Glu331+Leu-peptide	N	MS	Ala	Ile	Ser	Glu	Leu	Phe	Ala	Lys	Prudova et al., 2010
AISEVVSQ	ISEV	37269	0.21			cDNA FLJ77693, highly similar to Homo sapiens calpastatin	A8K8C4	257-281	peptide-Glu264+Val-peptide	N	MS	Ala	Ile	Ser	Glu	Val	Val	Ser	Gln	Schilling & Overall, 2008
AKAAQASD	KAAQ	90673	0			78 kDa glucose-regulated protein	P20029	20-655	peptide-Gln84+Leu-peptide	N	MS	Ala	Lys	Asn	Gln	Leu	Thr	Ser	Asn	auf dem Keller et al., 2010
-AKAIRDG	AKAI	3580	13.56			proteasome subunit p58	O95325	19-38	AKA+IRDGVIEASINHEKGY	N	MS	-	Ala	Lys	Ala	Ile	Arg	Asp	Gly	Schilling & Overall, 2008
AKDRDNHC	KDRD	132201	0			Nucleolin	P09405	2-707	peptide-Ala540+Leu-peptide	N	MS	Ala	Lys	Glu	Ala	Leu	Asn	Ser	Cys	auf dem Keller et al., 2010
AKEALNSC	KEAL	74000	0.04			Coiled-coil domain-containing protein 124	Q9D8X2	1-217	peptide-His118+Leu-peptide	N	MS	Ala	Lys	Ser	His	Leu	Glu	Leu	Pro	auf dem Keller et al., 2010
-AKHAVSE	AKHA	85101	0			histone H2B type F-S	P57053	107-122	AKH+AVSEGTKAVTKY	N	MS	-	Ala	Lys	His	Ala	Val	Ser	Glu	Schilling & Overall, 2008
AKNQLTSN	KNQL	74834	0.04			cathepsin L1	P06797	114-334	peptide-Arg318+Asp-peptide	N	MS	Ala	Lys	Asp	Arg	Asp	Asn	His	Cys	Kleifeld et al., 2010
-AKPAQGA	AKPA	20420	0.66			cDNA FLJ26567 fis, clone LNF05260, highly similar to Annexin VI	Q6ZP35	2020-01-27	peptide-Pro4+Ala-peptide	N	MS	-	Ala	Lys	Pro	Ala	Gln	Gly	Ala	Schilling & Overall, 2008
-AKRLIGR	AKRL	158735	0			heat shock 70kDa protein 8 isoform 2 variant	Q53HF2	69-86	AKR+LIGRRFDDAVVQSD	N	MS	-	Ala	Lys	Arg	Leu	Ile	Gly	Arg	Schilling & Overall, 2008
AKSHLELP	KSHL	5372	8.94			gelsolin	P13020	26-780	peptide-Ala433+Gln-peptide	N	MS	Ala	Met	Ala	Ala	Gln	His	Gly	Met	Kleifeld et al., 2010
ALAALLRD	LAAL	173	32.24			proteasome subunit alpha type-2	P25787	18-39	peptide-Ala28+Val-peptide	N	MS	Ala	Leu	Ala	Ala	Val	Ala	Gly	Gly	Schilling & Overall, 2008
ALAAVAGG	LAAV	1828	19.77			PDZ and LIM domain protein 1	O00151	38-69	peptide-Asn43+Leu-peptide	N	MS	Ala	Leu	Ala	Asn	Leu	Cys	Ile	Gly	Schilling & Overall, 2008
ALADIYTE	LADI	4253	11.77			WD repeat-containing protein 1 isoform 1 variant	Q53H17	43-65	peptide-Asp52+Ile-peptide	N	MS	Ala	Leu	Ala	Asp	Ile	Tyr	Thr	Glu	Schilling & Overall, 2008
ALADLKKA	LADL	810	25.7			Splicing factor, proline- and glutamine-rich	Q8VIJ6	1-699	peptide-Glu338+Ile-peptide	N	MS	Ala	Leu	Ala	Glu	Ile	Ala	Lys	Ala	auf dem Keller et al., 2010
ALAEIAKA	LAEI	2523	16.91			B-cell receptor-associated protein 31	Q61335	2-245	peptide-Met211+Gln-peptide	N	MS	Ala	Leu	Ala	Met	Gln	Lys	Gln	Ser	Kleifeld et al., 2010
ALAMQKQS	LAMQ	3373	14.17			ataxin-10	Q9UBB4	299-312	ALAT+IRLLDVLCE	N	MS	Ala	Leu	Ala	Thr	Ile	Arg	Leu	Leu	Schilling & Overall, 2008
ALANLCIG	LANL	30	34.48			fructose-bisphosphate aldolase	Q9CPQ9	1-364	peptide-Asn335+Ser-peptide	N	MS	Ala	Leu	Ala	Asn	Ser	Leu	Ala	Cys	Kleifeld et al., 2010
ALANSLAC	LANS	3030	15.17			cDNA FLJ76314, highly similar to Homo sapiens WD repeat domain 1	A8K6E9	43-65	peptide-Asp52+Ile-peptide	N	MS	Ala	Leu	Ala	Asp	Ile	Tyr	Thr	Glu	Schilling & Overall, 2008
ALATIRLL	LATI	2912	15.51			cytochrome b-c1 complex subunit Rieske-like protein 1	P0C7P4	29-55	peptide-Pro37+Leu-peptide	N	MS	Ala	Leu	Arg	Pro	Leu	Val	Gln	Ala	Schilling & Overall, 2008
ALEGLKMV	LEGL	5090	9.56			putative uncharacterized protein	Q3U7N9	1-1061	peptide-Ala118+Leu-peptide	N	MS	Ala	Leu	Gly	Ala	Leu	Val	Asp	Ser	Kleifeld et al., 2010
ALERLTTL	LERL	8825	3.57			40S ribosomal protein S19	Q9CZX8	2-145	peptide-Gly109+Leu-peptide	N	MS	Ala	Leu	Glu	Gly	Leu	Lys	Met	Val	auf dem Keller et al., 2010
ALGALVDS	LGAL	57	33.86			filamin-B	Q80X90	2602-01-01	peptide-Ala173+Leu-peptide	N	MS	Ala	Leu	Gly	Ala	Leu	Val	Asp	Ser	Kleifeld et al., 2010
ALGNVTTC	LGNV	5101	9.55			Putative uncharacterized protein Ddx23	D3Z0M9	1-819	peptide-Asn708+Leu-peptide	N	MS	Ala	Leu	Ser	Asn	Leu	Lys	Ala	Gly	Prudova et al., 2010
-ALPLLVR	ALPL	1362	22.18			26S proteasome non-ATPase regulatory subunit 3	O43242	438-457	AKA+IRDGVIEASINHEKGY	N	MS	-	Ala	Lys	Ala	Ile	Arg	Asp	Gly	Schilling & Overall, 2008
ALQAIRKK	LQAI	2097	18.61			Tropomyosin alpha-4 chain	Q6IRU2	2-248	peptide-Asn76+Leu-peptide	N	MS	Ala	Leu	Gln	Asn	Leu	Glu	Glu	Ala	auf dem Keller et al., 2010
ALQNLEEA	LQNL	600	27.52			acidic leucine-rich nuclear phosphoprotein 32 family member E	Q9BTT0	107-124	ALQN+LKNLKSLDLFNCE	N	MS	Ala	Leu	Gln	Asn	Leu	Lys	Asn	Leu	Schilling & Overall, 2008
ALQNLKNL	LQNL	600	27.52			Fibronectin	P11276	33-2477	peptide-Ser278+Ala-peptide	N	MS	Ala	Leu	Gln	Ser	Ala	Ser	Ala	Gly	Prudova et al., 2010
ALQSASAG	LQSA	6706	6.24			importin subunit beta-1	Q14974	316-332	GALQY+LVPILTQTLTK	N	MS	Ala	Leu	Gln	Tyr	Leu	Val	Pro	Ile	Schilling & Overall, 2008
ALQYLVPI	LQYL	2234	18.03			Spectrin beta chain, brain 1	Q62261	2363-01-01	peptide-Arg2078+Leu-peptide	N	MS	Ala	Leu	Glu	Arg	Leu	Thr	Thr	Leu	auf dem Keller et al., 2010
-ALRLVQA	ALRL	17825	0.85			importin subunit beta-3	O00410	946-964	ALP+LLVRVIQSADSKTKE	N	MS	-	Ala	Leu	Pro	Leu	Leu	Val	Arg	Schilling & Overall, 2008
ALRPLVQA	LRPL	748	26.23			cytochrome b-c1 complex subunit Rieske, mitochondrial precursor	P47985	20-46	peptide-Pro28+Leu-peptide	N	MS	Ala	Leu	Arg	Pro	Leu	Val	Gln	Ala	Schilling & Overall, 2008
ALSDLALH	LSDL	1627	20.76			creatine kinase B-type	P12277	160-181	peptide-Ser164+Leu-peptide	N	MS	Ala	Leu	Ser	Ser	Leu	Asp	Gly	Asp	Schilling & Overall, 2008
ALSNLKAG	LSNL	148	32.5			T-complex protein 1 subunit delta	P50991	306-319	DALSD+LALHFLNK	N	MS	Ala	Leu	Ser	Asp	Leu	Ala	Leu	His	Schilling & Overall, 2008
ALSSLDGD	LSSL	1041	24.28			transaldolase	P37837	274-294	SAKAA+QASDLEKIHLDEKSF	N	MS	Ala	Lys	Ala	Ala	Gln	Ala	Ser	Asp	Schilling & Overall, 2008
AMAAQHGM	MAAQ	2181	18.26			Zinc finger protein 622	Q91VY9	1-476	peptide-Pro41+Val-peptide	N	MS	Ala	Met	Ala	Pro	Val	Thr	Ala	Glu	auf dem Keller et al., 2010
AMAPVTAE	MAPV	8990	3.45			T-complex protein 1 subunit gamma isoform 2	P49368-2	355-377	peptide-Val359+Cys-peptide	N	MS	Ala	Met	Gln	Val	Cys	Arg	Asn	Val	Schilling & Overall, 2008
AMGTLLNT	MGTL	1709	20.33			cDNA, FLJ93375, highly similar to Homo sapiens ZW10, kinetochore associated, homolog	B2R7C2	651-667	AMGT+LLNTAISEVIGK	N	MS	Ala	Met	Gly	Thr	Leu	Leu	Asn	Thr	Schilling & Overall, 2008
AMQVCRNV	MQVC	129660	0			T-complex protein 1 subunit gamma	P49368	393-415	peptide-Val397+Cys-peptide	N	MS	Ala	Met	Gln	Val	Cys	Arg	Asn	Val	Schilling & Overall, 2008
AMSGLIAD	MSGL	1034	24.3			heat shock 70 kDa protein 4L	O95757	743-770	peptide-Trp747+Leu-peptide	N	MS	Ala	Met	Ser	Trp	Leu	Asn	Ser	Lys	Schilling & Overall, 2008
AMSWLNSK	MSWL	388	29.53			Ubiquitin-like modifier-activating enzyme 1	Q02053	1-1058	peptide-Ser222+Met-peptide	N	MS	Ala	Met	Val	Ser	Met	Val	Thr	Lys	auf dem Keller et al., 2010
AMVSMVTK	MVSM	18804	0.77			Staphylococcal nuclease domain-containing protein 1	Q78PY7	2-910	peptide-Phe800+Ile-peptide	N	MS	Ala	Phe	Ala	Phe	Ile	Gln	Val	Pro	auf dem Keller et al., 2010
ANAAQKFP	NAAQ	43974	0.15			60S ribosomal protein L8	P62917	156-180	peptide-Ala164+Val-peptide	N	MS	Ala	Asn	Arg	Ala	Val	Val	Gly	Val	Schilling & Overall, 2008
-ANGILNV	ANGI	42917	0.16			heat shock 70kDa protein 8 isoform 1 variant	Q53GZ6	481-498	ANG+ILNVSAVDKSTGKE	N	MS	-	Ala	Asn	Gly	Ile	Leu	Asn	Val	Schilling & Overall, 2008
ANGNITWA	NGNI	42424	0.16			L-lactate dehydrogenase B chain	P07195	83-103	YSVTANSK+IVVVTAGVRQQE	N	MS	Ala	Asn	Ser	Lys	Ile	Val	Val	Val	Schilling & Overall, 2008
--ANLQID	-ANL					myosin-9	P35579	1754-1770	AN+LQIDQINTDLNLER	N	MS	-	-	Ala	Asn	Leu	Gln	Ile	Asp	Schilling & Overall, 2008
ANRAVVGV	NRAV	84447	0			Glycyl-tRNA synthetase	Q9CZD3	1-729	peptide-Asn703+Ile-peptide	N	MS	Ala	Asn	Gly	Asn	Ile	Thr	Trp	Ala	auf dem Keller et al., 2010
ANSKIVVV	NSKI	45460	0.14			Proteasome subunit alpha type-6	Q9QUM9	1-246	peptide-Lys102+Tyr-peptide	N	MS	Ala	Asn	Trp	Lys	Tyr	Lys	Tyr	Gly	auf dem Keller et al., 2010
--ANVIRY	-ANV					ADP/ATP translocase 3	P12236	75-89	AN+VIRYFPTQALNF	N	MS	-	-	Ala	Asn	Val	Ile	Arg	Tyr	Schilling & Overall, 2008
ANWKYKYG	NWKY	65799	0.06			ubiquitinyl hydrolase-L1	P09936	37-60	peptide-Leu49+Leu-peptide	N	MS	Ala	Cys	Ala	Leu	Leu	Leu	Leu	Phe	Schilling & Overall, 2008
APAAGSAP	PAAG	19859	0.7			Cytoplasmic dynein 1 heavy chain 1	Q9JHU4	4644-01-01	peptide-Ala49+Leu-peptide	N	MS	Ala	Pro	Ala	Ala	Leu	Glu	Ala	Ala	Prudova et al., 2010
APAALEAA	PAAL	5	35.8			poly [ADP-ribose] polymerase 1	P09874	355-394	peptide-Ala379+Val-peptide	N	MS	Ala	Pro	Ala	Ala	Val	Asn	Ser	Ser	Schilling & Overall, 2008
APAAVNSS	PAAV	288	30.72			ras GTPase-activating protein-binding protein 1	Q13283	229-247	SSSPAPAD+IAQTVQEDLR	N	MS	Ala	Pro	Ala	Asp	Ile	Ala	Gln	Thr	Schilling & Overall, 2008
APACALLL	PACA	88506	0			zinc finger protein ZPR1	O75312	261-280	CNAPAQ+TNMKLVQIPHFKE	N	MS	Ala	Pro	Ala	Gln	Thr	Asn	Met	Lys	Schilling & Overall, 2008
APADIAQT	PADI	1194	23.25			ubiquitinyl hydrolase-L1	P09936	37-60	peptide-Cys47+Ala-peptide	N	MS	Ala	Pro	Ala	Cys	Ala	Leu	Leu	Leu	Schilling & Overall, 2008
APAESAAP	PAES	25591	0.43			transitional endoplasmic reticulum ATPase	P55072	295-312	NAPAI+IFIDELDAIAPK	N	MS	Ala	Pro	Ala	Ile	Ile	Phe	Ile	Asp	Schilling & Overall, 2008
APAIIFID	PAII	67196	0.05			gamma-enolase	P09104	64-89	peptide-Leu77+Ile-peptide	N	MS	Ala	Pro	Ala	Leu	Ile	Ser	Ser	Gly	Schilling & Overall, 2008
APALISSG	PALI	1209	23.16			Eukaryotic translation initiation factor 3 subunit F	Q9DCH4	2-361	peptide-Pro73+Ala-peptide	N	MS	Ala	Pro	Ala	Pro	Ala	Gln	Thr	Pro	auf dem Keller et al., 2010
APAPAQTP	PAPA	5395	8.9			cDNA FLJ77456, highly similar to Homo sapiens interleukin enhancer binding factor 3, 90kDa	A8K590	478-523	peptide-Pro497+Val-peptide	N	MS	Ala	Pro	Ala	Pro	Val	Val	Glu	Ala	Schilling & Overall, 2008
APAPVVEA	PAPV	889	25.16			Interleukin enhancer-binding factor 3 isoform 4	Q12906-4	1-698	peptide-Pro497+Val-peptide	N	MS	Ala	Pro	Ala	Pro	Val	Val	Glu	Ala	Schilling & Overall, 2008
APAQTNMK	PAQT	55396	0.09			brain acid soluble protein 1	P80723	121-149	peptide-Glu131+Ser-peptide	N	MS	Ala	Pro	Ala	Glu	Ser	Ala	Ala	Pro	Schilling & Overall, 2008
APASEIAE	PASE	48269	0.13			serine-threonine kinase receptor-associated protein	Q9Y3F4	218-235	SFEAPAT+INSASLHPEK	N	MS	Ala	Pro	Ala	Thr	Ile	Asn	Ser	Ala	Schilling & Overall, 2008
APASQHPA	PASQ	553	28			ADP-ribosylation factor-like protein 3	P36405	127-149	peptide-Ser137+Glu-peptide	N	MS	Ala	Pro	Ala	Ser	Glu	Ile	Ala	Glu	Schilling & Overall, 2008
APATINSA	PATI	708	26.55			ATP synthase subunit beta, mitochondrial precursor	P06576	351-387	peptide-Thr374+Thr-peptide	N	MS	Ala	Pro	Ala	Thr	Thr	Phe	Ala	His	Schilling & Overall, 2008
APATTFAH	PATT	49126	0.12			actin, alpha cardiac muscle 1	P68033	3-377	peptide-Ala31+Val-peptide	N	MS	Ala	Pro	Arg	Ala	Val	Phe	Pro	Ser	Kleifeld et al., 2010
APCVLIYI	PCVL	18510	0.79			prolactin	P01236	29-227	peptide-Ala139+Ile-peptide	P		Ala	Pro	Glu	Ala	Ile	Leu	Ser	Lys	Macotela et al., 2006
APEAILSK	PEAI	1302	22.52			Synaptic vesicle membrane protein VAT-1 homolog	Q62465	2-406	peptide-Ala52+Ser-peptide	N	MS	Ala	Pro	Glu	Ala	Ser	Ala	Ser	Ala	Prudova et al., 2010
APEASASA	PEAS	47841	0.13			Asparaginyl-tRNA synthetase, cytoplasmic	Q8BP47	2-559	peptide-Arg436+Leu-peptide	N	MS	Ala	Pro	Glu	Arg	Leu	Met	Thr	Asp	auf dem Keller et al., 2010
APEGSVAN	PEGS	93749	0			fatty acid synthase	P49327	274-298	peptide-Ser286+Phe-peptide	N	MS	Ala	Pro	Glu	Ser	Phe	Glu	Tyr	Ile	Schilling & Overall, 2008
APEQEQAA	PEQE	153550	0			Ras GTPase-activating protein-binding protein 1	P97855	2-465	peptide-Gly118+Ser-peptide	N	MS	Ala	Pro	Glu	Gly	Ser	Val	Ala	Asn	auf dem Keller et al., 2010
APERLMTD	PERL	2666	16.38			brain acid soluble protein 1	P80723	102-121	APEQ+EQAAPGPAAGGEAPK	N	MS	Ala	Pro	Glu	Gln	Glu	Gln	Ala	Ala	Schilling & Overall, 2008
APESFEYI	PESF	4737	10.47			nudC domain-containing protein 3	Q8IVD9	140-170	peptide-Ala154+Val-peptide	N	MS	Ala	Pro	Gly	Ala	Val	Ala	Gly	Ala	Schilling & Overall, 2008
APFAVIGS	PFAV	4465	11.18			WW domain-binding protein 11	Q9Y2W2	381-555	peptide-Asn539+Leu-peptide	N	MS	Ala	Pro	Pro	Asn	Leu	Ile	Gln	Arg	Schilling & Overall, 2008
APGAVAGA	PGAV	4232	11.82			bifunctional purine biosynthesis protein PURH	P31939	2020-01-19	MAPGQ+LALFSVSDKTGLVE	N	MS	Ala	Pro	Gly	Gln	Leu	Ala	Leu	Phe	Schilling & Overall, 2008
APGGLIGV	PGGL	254	31.16			Eukaryotic translation initiation factor 3 subunit B	Q8JZQ9	1-803	peptide-Lys98+Ala-peptide	N	MS	Ala	Pro	Gly	Lys	Ala	Glu	Ala	Val	auf dem Keller et al., 2010
APGGLQHE	PGGL	254	31.16			Eukaryotic translation initiation factor 2 subunit 3, X-linked	Q9Z0N1	2-472	peptide-Gly335+Leu-peptide	N	MS	Ala	Pro	Gly	Gly	Leu	Ile	Gly	Val	Prudova et al., 2010
APGKAEAV	PGKA	107211	0			Myosin regulatory light chain 12B	Q3THE2	2-172	peptide-Asp149+Lys-peptide	N	MS	Ala	Pro	Ile	Asp	Lys	Lys	Gly	Asn	Prudova et al., 2010
APGQLALF	PGQL	179	32.21			transcriptional activator protein Pur-alpha	Q00577	1964-04-01	peptide-Gly53+Leu-peptide	N	MS	Ala	Pro	Gly	Gly	Leu	Gln	His	Glu	Schilling & Overall, 2008
APIDKKGN	PIDK	140518	0			Filamin-B	Q80X90	2602-01-01	peptide-Lys681+Ile-peptide	N	MS	Ala	Pro	Leu	Lys	Ile	Leu	Ala	Gln	auf dem Keller et al., 2010
APKRQSAI	PKRQ	63276	0.06			glyceraldehyde-3-phosphate dehydrogenase	P04406	118-145	peptide-Phe131+Val-peptide	N	MS	Ala	Pro	Met	Phe	Val	Met	Gly	Val	Schilling & Overall, 2008
--APLFSQ	-APL					lamin-B1	P20700	174-187	AS+LAAAKKQLADE	N	MS	-	-	Ala	Ser	Leu	Ala	Ala	Ala	Schilling & Overall, 2008
APLKILAQ	PLKI	3389	14.1			Peptidyl-prolyl cis-trans isomerase FKBP4	P30416	2-458	peptide-Pro19+Leu-peptide	N	MS	Ala	Pro	Leu	Pro	Leu	Glu	Gly	Val	auf dem Keller et al., 2010
APLPLEGV	PLPL	16	35.08			Peptidyl-prolyl cis-trans isomerase FKBP4	Q02790	2020-07-28	peptide-Pro19+Met-peptide	N	MS	Ala	Pro	Leu	Pro	Met	Glu	Gly	Val	Schilling & Overall, 2008
APLPMEGV	PLPM	233	31.49			heat shock 70 kDa protein 1	P08107	384-415	peptide-Ser400+Leu-peptide	N	MS	Ala	Pro	Leu	Ser	Leu	Gly	Leu	Glu	Schilling & Overall, 2008
APLSLGLE	PLSL	66	33.53			heat shock 70 kDa protein 1L	P34931	389-417	peptide-Ser402+Leu-peptide	N	MS	Ala	Pro	Leu	Ser	Leu	Gly	Leu	Glu	Schilling & Overall, 2008
APMFVMGV	PMFV	86630	0			Septin-5	Q9Z2Q6	1-369	peptide-Ala245+Val-peptide	N	MS	Ala	Pro	Phe	Ala	Val	Ile	Gly	Ser	Prudova et al., 2010
APPGLYTK	PPGL	1031	24.36			aspartate aminotransferase, cytoplasmic	P17174	2020-01-20	APPS+VFAEVPQAQPVLVFK	N	MS	Ala	Pro	Pro	Ser	Val	Phe	Ala	Glu	Schilling & Overall, 2008
APPNLIQR	PPNL	2542	16.83			argininosuccinate synthase	P00966	196-224	peptide-Gly205+Leu-peptide	N	MS	Ala	Pro	Pro	Gly	Leu	Tyr	Thr	Lys	Schilling & Overall, 2008
APPSVFAE	PPSV	66784	0.05			Lipoprotein lipase	P11152	28-474	peptide-Arg197+Leu-peptide	N	MS	Ala	Pro	Ser	Arg	Leu	Ser	Pro	Asp	auf dem Keller et al., 2010
APRAVFPS	PRAV	513	28.34			Ubiquitin carboxyl-terminal hydrolase 5	P56399	2-858	peptide-Met416+Phe-peptide	N	MS	Ala	Pro	Arg	Met	Phe	Lys	Ala	Leu	Prudova et al., 2010
APRMFKAL	PRMF	2138	18.44			60S ribosomal protein L13	P26373	45-60	IAPRP+ASGPIRPIVR	N	MS	Ala	Pro	Arg	Pro	Ala	Ser	Gly	Pro	Schilling & Overall, 2008
APRPASGP	PRPA	5645	8.39			bifunctional aminoacyl-tRNA synthetase	P07814	693-708	EAPCV+LIYIPDGHTK	N	MS	Ala	Pro	Cys	Val	Leu	Ile	Tyr	Ile	Schilling & Overall, 2008
APSGFYIA	PSGF	247	31.24			WD repeat-containing protein 1 isoform 1 variant	Q53H17	65-81	YAPSG+FYIASGDVSGK	N	MS	Ala	Pro	Ser	Gly	Phe	Tyr	Ile	Ala	Schilling & Overall, 2008
APSNILIQ	PSNI	104	32.95			Lysosomal protective protein	P16675	24-474	peptide-Asn333+Tyr-peptide	N	MS	Ala	Pro	Ser	Asn	Tyr	Leu	Asn	Asn	auf dem Keller et al., 2010
APSNYLNN	PSNY	149	32.5			cDNA FLJ76314, highly similar to Homo sapiens WD repeat domain 1	A8K6E9	65-81	YAPSG+FYIASGDVSGK	N	MS	Ala	Pro	Ser	Gly	Phe	Tyr	Ile	Ala	Schilling & Overall, 2008
APSRLSPD	PSRL	206	31.77			WW domain-binding protein 11	Q9Y2W2	129-168	peptide-Asn150+Ile-peptide	N	MS	Ala	Pro	Ser	Asn	Ile	Leu	Ile	Gln	Schilling & Overall, 2008
APSSFQLL	PSSF	497	28.51			LPS-induced CXC chemokine	Q8K3I3	41-132	peptide-Ser44+Val-peptide	P		Ala	Pro	Ser	Ser	Val	Ile	Ala	Ala	Tester et al., 2007	21340
APSSVIAA	PSSV	1685	20.49			C-X-C motif chemokine 5	P50228	41-132	Ala-Pro-Ser-Ser44+Val-peptide	P	NT	Ala	Pro	Ser	Ser	Val	Ile	Ala	Ala	Tester et al., 2007
APSTMKIK	PSTM	1132	23.69			Ser-Gly-Ala-Pro-Ser-Trp-Leu-Leu-Thr-Ala			Ser-Gly-Ala-Pro-Ser-Trp+Leu-Leu-Thr-Ala	N		Ala	Pro	Ser	Trp	Leu	Leu	Thr	Ala	Murphy, 2004
APSWLLTA	PSWL	6	35.71			SNW domain-containing protein 1	Q9CSN1	2-536	peptide-Gln12+Leu-peptide	N	MS	Ala	Pro	Thr	Gln	Leu	Ser	Gln	Asp	auf dem Keller et al., 2010
APTGSYSD	PTGS	78410	0.04			SF3B1 protein	A0JLT9	80-111	peptide-Ala89+Leu-peptide	N	MS	Ala	Pro	Val	Ala	Leu	Leu	Asn	Asp	Schilling & Overall, 2008
APTQLSQD	PTQL	2595	16.68			laminin subunit alpha-1	P19137	25-3084	peptide-Gly2583+Ser-peptide	P	MS	Ala	Pro	Thr	Gly	Ser	Tyr	Ser	Asp	Doucet & Overall, 2010
APVALLND	PVAL	36	34.3			SF3B1 protein	A0PJH5	80-111	peptide-Ala89+Leu-peptide	N	MS	Ala	Pro	Val	Ala	Leu	Leu	Asn	Asp	Schilling & Overall, 2008
APVNIFKA	PVNI	267	30.99			T-complex protein 1 subunit beta	P80314	2-535	peptide-Asn10+Ile-peptide	N	MS	Ala	Pro	Val	Asn	Ile	Phe	Lys	Ala	Prudova et al., 2010
APVNVTTE	PVNV	1866	19.63			DNA-repair protein XRCC1	P18887	254-302	peptide-Pro288+Ala-peptide	N	MS	Ala	Pro	Val	Pro	Ala	Arg	Ala	Gln	Schilling & Overall, 2008
APVPARAQ	PVPA	7165	5.48			Tumor protein D52	P55327	142-166	peptide-Ala153+Phe-peptide	N	MS	Ala	Ser	Ala	Ala	Phe	Ser	Ser	Val	Schilling & Overall, 2008
AQAAIVVY	QAAI	3665	13.31			poly [ADP-ribose] polymerase 1	P09874	239-253	AQND+LIWNIKDELK	N	MS	Ala	Gln	Asn	Asp	Leu	Ile	Trp	Asn	Schilling & Overall, 2008
AQFATADP	QFAT	52847	0.1			Spectrin beta chain, brain 1	Q62261	2363-01-01	peptide-Trp2032+Leu-peptide	N	MS	Ala	Glu	Ala	Trp	Leu	Leu	Gly	Gln	auf dem Keller et al., 2010
AQGALRSE	QGAL	3410	14.05			Rho GDP-dissociation inhibitor 1	Q99PT1	2-204	peptide-Ser34+Ile-peptide	N	MS	Ala	Gln	Lys	Ser	Ile	Gln	Glu	Ile	auf dem Keller et al., 2010
AQKSIQEI	QKSI	115745	0			pyruvate dehydrogenase E1 component subunit alpha, somatic form, mitochondrial precursor	P08559	348-362	AAQFA+TADPEPPLE	N	MS	Ala	Gln	Phe	Ala	Thr	Ala	Asp	Pro	Schilling & Overall, 2008
AQNDLIWN	QNDL	130177	0			bifunctional aminoacyl-tRNA synthetase	P07814	155-179	peptide-Ala159+Phe-peptide	N	MS	Ala	Gln	Gln	Ala	Phe	Gln	Ser	Val	Schilling & Overall, 2008
-AQNLMAL	AQNL	1910	19.46			splicing factor arginine/serine-rich 11	Q05519	228-244	AQS+LISAAIEPDKKEE	N	MS	-	Ala	Gln	Ser	Leu	Ile	Ser	Ala	Schilling & Overall, 2008
AQQAFQSV	QQAF	13391	1.48			gelsolin	P13020	26-780	peptide-Ala323+Leu-peptide	N	MS	Ala	Gln	Gly	Ala	Leu	Arg	Ser	Glu	Kleifeld et al., 2010
-AQSLISA	AQSL	2160	18.36			peroxiredoxin-2	P32119	154-167	ALR+LVQAFQYTDE	N	MS	-	Ala	Leu	Arg	Leu	Val	Gln	Ala	Schilling & Overall, 2008
-ARTLLAK	ARTL	11003	2.2			cDNA FLJ77848	A8K7Q2	245-262	ANG+ILNVSAVDKSTGKE	N	MS	-	Ala	Asn	Gly	Ile	Leu	Asn	Val	Schilling & Overall, 2008
ASAAFSSV	SAAF	3114	14.93			Tumor protein D52 isoform 3	P55327-3	165-190	peptide-Ala177+Phe-peptide	N	MS	Ala	Ser	Ala	Ala	Phe	Ser	Ser	Val	Schilling & Overall, 2008
ASAELSSE	SAEL	14164	1.33			Thrombospondin-2	Q03350	1-1172	peptide-Gly19+Asp-peptide	N	MS	Ala	Ser	Ala	Gly	Asp	His	Val	Lys	Prudova et al., 2010
ASAGDHVK	SAGD	78160	0.04			Alpha-enolase	P17182	2-434	peptide-Gly312+Ile-peptide	N	MS	Ala	Ser	Ala	Gly	Ile	Gln	Val	Val	auf dem Keller et al., 2010
ASAGIQVV	SAGI	7982	4.45			enolase	Q6PHC1	1-366	peptide-Gly244+Ile-peptide	N	MS	Ala	Ser	Ala	Gly	Ile	Gln	Val	Val	Kleifeld et al., 2010
ASAPYFGK	SAPY	5683	8.29			ribosomal L1 domain-containing protein 1	O76021	1934-03-01	peptide-Ser8+Leu-peptide	N	MS	Ala	Ser	Ala	Ser	Leu	Ser	Ser	Ala	Schilling & Overall, 2008
ASASLSSA	SASL	2302	17.79			transketolase	P29401	328-347	GHASDR+IIALDGDTKNSTF	N	MS	Ala	Ser	Asp	Arg	Ile	Ile	Ala	Leu	Schilling & Overall, 2008
ASDRIIAL	SDRI	85396	0			60S ribosomal protein L8	P62917	128-144	ASGN+YATVISHNPETK	N	MS	Ala	Ser	Gly	Asn	Tyr	Ala	Thr	Val	Schilling & Overall, 2008
-ASGNYAT	ASGN	78599	0.04			Destrin	Q9R0P5	2-165	Ala-Ser-Gly4+Val-peptide	N	MS	-	Ala	Ser	Gly	Val	Gln	Val	Ala	auf dem Keller et al., 2010
ASGNYATV	SGNY	9003	3.44			Phosphoglycerate kinase 2	P09041	2-417	peptide-Ser155+Lys-peptide	N	MS	Ala	Ser	Leu	Ser	Lys	Leu	Gly	Asp	auf dem Keller et al., 2010
-ASGVQVA	ASGV	34862	0.24			Cofilin-2	P45591	2-166	Ala-Ser-Gly4+Val-peptide	N	MS	-	Ala	Ser	Gly	Val	Thr	Val	Asn	auf dem Keller et al., 2010
-ASGVTVN	ASGV	34862	0.24			6-phosphogluconate dehydrogenase, decarboxylating	P52209	200-215	AYH+LMKDVLGMAQDE	N	MS	-	Ala	Tyr	His	Leu	Met	Lys	Asp	Schilling & Overall, 2008
--ASLAAA	-ASL					karatin, type II cytoskeletal 8	P05787	328-341	AS+LEAAIADAEQR	N	MS	-	-	Ala	Ser	Leu	Glu	Ala	Ala	Schilling & Overall, 2008
--ASLEAA	-ASL		0.24			cDNA FLJ77456, highly similar to Homo sapiens interleukin enhancer binding factor 3, 90kDa	A8K590	39-51	RA+LKAVSDWIDE	N	MS	-	-	Arg	Ala	Leu	Lys	Ala	Val	Schilling & Overall, 2008
ASLSKLGD	SLSK	43314	0.16			Phosphoglycerate kinase 1	P09411	2-417	peptide-Ser155+Lys-peptide	N	MS	Ala	Ser	Leu	Ser	Lys	Leu	Gly	Asp	auf dem Keller et al., 2010
ASSNVFSM	SSNV	76621	0.04			protein disulfide-isomerase A3 precursor	P30101	130-147	QAGPASVP+LRTEEEFKK	N	MS	Ala	Ser	Val	Pro	Leu	Arg	Thr	Glu	Schilling & Overall, 2008
ASVPLRTE	SVPL	9130	3.32			Actin, gamma-enteric smooth muscle	P63268	3-376	peptide-Ala232+Ser-peptide	N	MS	Ala	Thr	Ala	Ala	Ser	Ser	Ser	Ser	auf dem Keller et al., 2010
ATAASSSS	TAAS	15321	1.15			Actin, aortic smooth muscle	P62737	3-377	peptide-Ala233+Ser-peptide	N	MS	Ala	Thr	Ala	Ala	Ser	Ser	Ser	Ser	auf dem Keller et al., 2010
ATDVTTTP	TDVT	120005	0			ATP-citrate synthase	P53396	92-118	peptide-Phe101+Leu-peptide	N	MS	Ala	Thr	Gly	Phe	Leu	Lys	Asn	Phe	Schilling & Overall, 2008
ATGFLKNF	TGFL	3125	14.88			dolichyl-diphosphooligosaccharide--protein glycosyltransferase subunit 1 precursor	P04843	65-80	ATSF+LLALEPELEAR	N	MS	Ala	Thr	Ser	Phe	Leu	Leu	Ala	Leu	Schilling & Overall, 2008
ATSFLLAL	TSFL	3278	14.48			calreticulin precursor	P27797	286-322	peptide-Asn310+Phe-peptide	N	MS	Ala	Tyr	Asp	Asn	Phe	Gly	Val	Leu	Schilling & Overall, 2008
AVALLIGP	VALL	2574	16.73			3-hydroxy-3-methylglutaryl-Coenzyme A synthase 1	Q5XJ04	169-191	peptide-Leu179+Leu-peptide	N	MS	Ala	Val	Ala	Leu	Leu	Ile	Gly	Pro	Schilling & Overall, 2008
AVANNQDK	VANN	20467	0.66			cDNA, FLJ96671, Homo sapiens 3-hydroxy-3-methylglutaryl-Coenzyme A synthase 1	B2RDL8	169-191	peptide-Leu179+Leu-peptide	N	MS	Ala	Val	Ala	Leu	Leu	Ile	Gly	Pro	Schilling & Overall, 2008
AVARLSQR	VARL	1188	23.3			cDNA, FLJ95666, highly similar to Homo sapiens albumin	B2RBS8	234-251	FKAWAVAR+LSQRFPKAE	N	MS	Ala	Val	Ala	Arg	Leu	Ser	Gln	Arg	Schilling & Overall, 2008
AVAWEAGK	VAWE	51653	0.11			ADH5 protein	Q6FI45	1931-09-01	peptide-Trp14+Glu-peptide	N	MS	Ala	Val	Ala	Trp	Glu	Ala	Gly	Lys	Schilling & Overall, 2008
AVCMLSNT	VCML	15800	1.08			tubulin alpha-4A chain	P68366	373-390	AVCM+LSNTTAIAEAWAR	N	MS	Ala	Val	Cys	Met	Leu	Ser	Asn	Thr	Schilling & Overall, 2008
AVCVLKGD	VCVL	37928	0.2			vacuolar protein sorting-associated protein VTA1 homolog	Q9NP79	287-307	VSTAVQN+LQKALKLLTTGRE	N	MS	Ala	Val	Gln	Asn	Leu	Gln	Lys	Ala	Schilling & Overall, 2008
AVEALLSA	VEAL	4638	10.76			creatine kinase B-type	P12277	156-172	LAVEA+LSSLDGDLAGR	N	MS	Ala	Val	Glu	Ala	Leu	Ser	Ser	Leu	Schilling & Overall, 2008
AVEALSSL	VEAL	4638	10.76			adenosine deaminase, RNA-specific isoform ADAR-a variant	Q59EC0	663-684	peptide-Ala672+Gln-peptide	N	MS	Ala	Val	Gly	Ala	Gln	Thr	Phe	Pro	Schilling & Overall, 2008
AVGALLVY	VGAL	118	32.84			Ras-related protein Rab-11B	P46638	2-215	peptide-Ala87+Leu-peptide	N	MS	Ala	Val	Gly	Ala	Leu	Leu	Val	Tyr	auf dem Keller et al., 2010
AVGAQTFP	VGAQ	4984	9.83			Ras-related protein Rab-11A	P62492	2-213	peptide-Ala87+Leu-peptide	N	MS	Ala	Val	Gly	Ala	Leu	Leu	Val	Tyr	auf dem Keller et al., 2010
AVGAVEAS	VGAV	5821	8			importin subunit beta-3	O00410	970-991	peptide-Lys978+Ile-peptide	N	MS	Ala	Val	Gly	Lys	Ile	Met	Lys	Phe	Schilling & Overall, 2008
AVGKIMKF	VGKI	5578	8.52			elongation factor 1-alpha 1	P10126	1-462	peptide-Val437+Ile-peptide	N	MS	Ala	Val	Gly	Val	Ile	Lys	Ala	Val	Kleifeld et al., 2010
AVGVIKAV	VGVI	18403	0.8			Pyruvate kinase isozymes M1/M2	P52480	2-531	peptide-Asn480+Ala-peptide	N	MS	Ala	Val	Leu	Asn	Ala	Trp	Ala	Glu	auf dem Keller et al., 2010
AVLNAWAE	VLNA	40362	0.18			fibronectin	P02751	32-2386	peptide-Gln47+Ser-peptide	P	MS	Ala	Val	Ser	Gln	Ser	Lys	Pro	Gly	Doucet & Overall, 2010
-AVNVYST	AVNV	42260	0.16			dihydrolipoyllysine-residue acetyltransferase component of pyruvate dehydrogenase complex, mitochondrial	P10515	528-544	NAH+IKGVETIANDVVSL	N	MS	-	Asn	Ala	His	Ile	Lys	Gly	Val	Schilling & Overall, 2008
AVQNLQKA	VQNL	455	28.87			Ubiquitin carboxyl-terminal hydrolase 5	P56399	2-858	peptide-Ala153+Leu-peptide	N	MS	Ala	Val	Glu	Ala	Leu	Leu	Ser	Ala	auf dem Keller et al., 2010
AVRAIKEH	VRAI	747	26.23			nascent polypeptide-associated complex subunit alpha	Q13765	182-212	peptide-Ala198+Leu-peptide	N	MS	Ala	Val	Arg	Ala	Leu	Lys	Asn	Asn	Schilling & Overall, 2008
AVRALKNN	VRAL	313	30.43			nascent polypeptide-associated complex subunit alpha-2	Q9H009	180-212	peptide-Ala198+Leu-peptide	N	MS	Ala	Val	Arg	Ala	Leu	Lys	Asn	Asn	Schilling & Overall, 2008
AVRWLLTA	VRWL	789	25.89			tubulin alpha-8 chain	Q9NY65	373-390	AVCM+LSNTTAIAEAWAR	N	MS	Ala	Val	Cys	Met	Leu	Ser	Asn	Thr	Schilling & Overall, 2008
AVSELAGH	VSEL	1067	24.1			proteasome subunit beta type-3	P49720	177-192	DAVSG+MGVIVHIIEK	N	MS	Ala	Val	Ser	Gly	Met	Gly	Val	Ile	Schilling & Overall, 2008
AVSGMGVI	VSGM	790	25.89			alpha-aminoadipic semialdehyde dehydrogenase isoform 2	P49419-2	347-362	QAVSM+FLGAVEEAKK	N	MS	Ala	Val	Ser	Met	Phe	Leu	Gly	Ala	Schilling & Overall, 2008
AVSMFLGA	VSMF	7017	5.71			myeloid/lymphoid or mixed-lineage leukemia/clathrin assembly protein fusion protein	Q8N6B4	231-260	peptide-Ser247+Leu-peptide	N	MS	Ala	Val	Ser	Ser	Leu	Ala	Ser	Thr	Schilling & Overall, 2008
AVSQSKPG	VSQS	59158	0.08			60S ribosomal protein L4	P36578	49-71	peptide-Glu56+Leu-peptide	N	MS	Ala	Val	Ser	Glu	Leu	Ala	Gly	His	Schilling & Overall, 2008
AVSSLAST	VSSL	437	29.09			phosphatidylinositol binding clathrin assembly protein	Q6GMQ6	292-321	peptide-Ser308+Leu-peptide	N	MS	Ala	Val	Ser	Ser	Leu	Ala	Ser	Thr	Schilling & Overall, 2008
AVSTLVEV	VSTL	1773	20			Ser-Gly-Ala-Val-Ser-Trp-Leu-Leu-Thr-Ala			Ser-Gly-Ala-Val-Ser-Trp+Leu-Leu-Thr-Ala	N		Ala	Val	Ser	Trp	Leu	Leu	Thr	Ala	Murphy, 2004
AVSWLLTA	VSWL	294	30.66			14-3-3 protein eta	P68510	2-246	peptide-Glu32+Leu-peptide	N	MS	Ala	Val	Thr	Glu	Leu	Asn	Glu	Pro	auf dem Keller et al., 2010
AVTELNEP	VTEL	38961	0.19			Eukaryotic translation initiation factor 4B	Q8BGD9	1-611	peptide-Ser359+Ile-peptide	N	MS	Arg	Ala	Ala	Ser	Ile	Phe	Gly	Gly	Prudova et al., 2010
AYDNFGVL	YDNF	124662	0			ras GTPase-activating-like protein IQGAP1	P46940	968-988	LEAYQH+LFYLLQTNPTYLAK	N	MS	Ala	Tyr	Gln	His	Leu	Phe	Tyr	Leu	Schilling & Overall, 2008
-AYHLMKD	AYHL	2964	15.34			Microtubule-associated protein RP/EB family member 1	Q61166	2-268	Ala-Val-Asn4+Val-peptide	N	MS	-	Ala	Val	Asn	Val	Tyr	Ser	Thr	auf dem Keller et al., 2010
AYQHLFYL	YQHL	7835	4.62			poly [ADP-ribose] polymerase 1	P09874	772-795	peptide-Leu777+Leu-peptide	N	MS	Ala	Tyr	Ser	Leu	Leu	Arg	Gly	Gly	Schilling & Overall, 2008
AYSLLRGG	YSLL	5701	8.25			Serum albumin	P02768	25-609	FKAWAVAR+LSQRFPKAE	N	MS	Ala	Val	Ala	Arg	Leu	Ser	Gln	Arg	Schilling & Overall, 2008
CAISILGK	AISI	7875	4.58			malate dehydrogenase, cytoplasmic	P40925	59-74	CALP+LLKDVIATDKE	N	MS	Cys	Ala	Leu	Pro	Leu	Leu	Lys	Asp	Schilling & Overall, 2008
CALPLLKD	ALPL	1362	22.18			Destrin	Q9R0P5	2-165	peptide-Ala83+Leu-peptide	N	MS	Cys	Arg	Tyr	Ala	Leu	Tyr	Asp	Ala	auf dem Keller et al., 2010
CAQGCICK	AQGC	134709	0			Enoyl-CoA delta isomerase 2, mitochondrial isoform 2	O75521-2	1-359	peptide-Gly280+Leu-peptide	N	MS	Cys	Ala	Gln	Gly	Leu	Val	Thr	Glu	Schilling & Overall, 2008
CAQGLVTE	AQGL	2174	18.29			L-lactate dehydrogenase B chain	P07195	16-48	peptide-Ser39+Ile-peptide	N	MS	Cys	Ala	Ile	Ser	Ile	Leu	Gly	Lys	Schilling & Overall, 2008
--CDFTGT	-CDF					glyceraldehyde-3-phosphate dehydrogenase	P04406	203-228	peptide-Asn205+Ile-peptide	N	MS	-	-	Gln	Asn	Ile	Ile	Pro	Ala	Schilling & Overall, 2008
CHANCSGP	HANC	58484	0.08			Serum albumin	P02768	25-609	peptide-Asp273+Leu-peptide	N	MS	Cys	His	Gly	Asp	Leu	Leu	Glu	Cys	Schilling & Overall, 2008
CHGDLLEC	HGDL	5065	9.6			cDNA, FLJ95666, highly similar to Homo sapiens albumin	B2RBS8	264-286	peptide-Asp273+Leu-peptide	N	MS	Cys	His	Gly	Asp	Leu	Leu	Glu	Cys	Schilling & Overall, 2008
CIAGVLVP	IAGV	4153	12.02			myosin light chain 1, skeletal muscle isoform	P02602	2-192	peptide-Tyr181+Glu-peptide	P		Cys	Ile	Asn	Tyr	Glu	Ala	Phe	Val	Sawicki et al., 2005	20300
CINYEAFV	INYE	107292	0			glyceraldehyde-3-phosphate dehydrogenase	P04406	141-172	peptide-Pro159+Leu-peptide	N	MS	Cys	Leu	Ala	Pro	Leu	Ala	Lys	Val	Schilling & Overall, 2008
CLAPLAKV	LAPL	227	31.56			EIF4G3 protein	Q504Z1	647-663	CLCR+LLTTIGKDLDFE	N	MS	Cys	Leu	Cys	Arg	Leu	Leu	Thr	Thr	Schilling & Overall, 2008
CLCRLLTT	LCRL	15198	1.17			importin subunit beta-1	Q14974	762-777	ESCLEA+YTGIVQGLK	N	MS	Cys	Leu	Glu	Ala	Tyr	Thr	Gly	Ile	Schilling & Overall, 2008
CLEAYTGI	LEAY	9889	2.79			thioredoxin-dependent peroxide reductase, mitochondrial precursor	P30048	217-248	peptide-Asn232+Trp-peptide	N	MS	Cys	Pro	Ala	Asn	Trp	Thr	Pro	Asp	Schilling & Overall, 2008
-CLELFSE	CLEL	131359	0			nicotinate-nucleotide pyrophosphorylase [carboxylating]	Q15274	110-126	CSG+IASAAAAAVEAAR	N	MS	-	Cys	Ser	Gly	Ile	Ala	Ser	Ala	Schilling & Overall, 2008
CNSPVWGA	NSPV	22838	0.54			synaptonemal complex protein SC65	Q92791	70-95	peptide-Asn79+Cys-peptide	N	MS	Cys	His	Ala	Asn	Cys	Ser	Gly	Pro	Schilling & Overall, 2008
CPAGWKPG	PAGW	166	32.3			peroxiredoxin-4	Q13162	240-263	peptide-Gly248+Trp-peptide	N	MS	Cys	Pro	Ala	Gly	Trp	Lys	Pro	Gly	Schilling & Overall, 2008
CPALLVVG	PALL	279	30.81			acyl carrier protein, mitochondrial precursor	O14561	137-152	LMCPQE+IVDYIADKK	N	MS	Cys	Pro	Gln	Glu	Ile	Val	Asp	Tyr	Schilling & Overall, 2008
CPANWTPD	PANW	62	33.62			humer	Q14579	2020-01-23	peptide-Asn6+Trp-peptide	N	MS	Cys	Pro	Ala	Asn	Trp	Thr	Pro	Asp	Schilling & Overall, 2008
CPEALFQP	PEAL	306	30.54			actin, cytoplasmic 2	P63261	256-284	peptide-Ala260+Leu-peptide	N	MS	Cys	Pro	Glu	Ala	Leu	Phe	Gln	Pro	Schilling & Overall, 2008
CPQEIVDY	PQEI	4293	11.67			Chromobox protein homolog 3	P23198	1-183	peptide-Ile163+Val-peptide	N	MS	Cys	Pro	Gln	Ile	Val	Ile	Ala	Phe	auf dem Keller et al., 2010
CPQIVIAF	PQIV	86419	0			Chromobox protein homolog 5	Q61686	1-191	peptide-Ile163+Val-peptide	N	MS	Cys	Pro	Gln	Ile	Val	Ile	Ala	Phe	auf dem Keller et al., 2010
CPTEIIAF	PTEI	7055	5.66			Tubulin alpha-1C chain	P68373	1-449	peptide-Gly350+Phe-peptide	N	MS	Cys	Pro	Thr	Gly	Phe	Lys	Val	Gly	auf dem Keller et al., 2010
CPTGFKVG	PTGF	919	24.96			metallothionein-1X	P80297	23-61	peptide-Gly40+Cys-peptide	N	MS	Cys	Pro	Val	Gly	Cys	Ala	Lys	Cys	Schilling & Overall, 2008
CPVGCAKC	PVGC	27789	0.37			Cytochrome c oxidase subunit 6B1	P56391	1986-02-01	peptide-Ser68+Trp-peptide	N	MS	Cys	Pro	Val	Ser	Trp	Val	Ser	Ala	auf dem Keller et al., 2010
CPVGYHAM	PVGY	123	32.81			Plasminogen activator inhibitor 1 RNA-binding protein	Q9CY58	2-407	peptide-Ala59+Gln-peptide	N	MS	Gln	Ala	Ala	Ala	Gln	Thr	Asn	Ser	Prudova et al., 2010
CPVSWVSA	PVSW	329	30.23			Chemokine (C-C motif) ligand 17	Q9WUZ6	21-93	peptide-Asp60+Ala-peptide	P	NT	Cys	Ser	Arg	Asp	Ala	Ile	Val	Phe	Greenlee et al., 2006
CRYALYDA	RYAL	40222	0.18			H2A histone family, member Y isoform 2 variant	Q59FH0	91-112	peptide-Pro99+Val-peptide	N	MS	Cys	Asn	Ser	Pro	Val	Trp	Gly	Ala	Schilling & Overall, 2008
-CSGIASA	CSGI	17262	0.9			14-3-3 protein eta	Q04917	191-207	QAC+LLAKQAFDDAIAE	N	MS	-	Gln	Ala	Cys	Leu	Leu	Ala	Lys	Schilling & Overall, 2008
CSRDAIVF	SRDA	91596	0			glyceraldehyde-3-phosphate dehydrogenase	P04406	141-166	peptide-Asn155+Cys-peptide	N	MS	Cys	Thr	Thr	Asn	Cys	Leu	Ala	Pro	Schilling & Overall, 2008
CTTNCLAP	TTNC	143127	0			cDNA FLJ13520 fis, clone PLACE1005828	Q9H8K0	1941-01-01	peptide-Leu30+Pro-peptide	N	MS	Cys	Val	Glu	Leu	Pro	Glu	Ala	Ala	Schilling & Overall, 2008
CVELPEAA	VELP	119766	0			Myosin-9 isoform 3	P35579-2	601-619	QACVLM+IKALELDSNLYR	N	MS	Cys	Val	Leu	Met	Ile	Lys	Ala	Leu	Schilling & Overall, 2008
CVLMIKAL	VLMI	120261	0			myosin-9	P35579	737-755	QACVLM+IKALELDSNLYR	N	MS	Cys	Val	Leu	Met	Ile	Lys	Ala	Leu	Schilling & Overall, 2008
CVVHYTGM	VVHY	6948	5.83			Dabcyl-Pro-Cha-Gly-Cys(Me)-His-Ala-Lys(Fam)-NH2			Dabcyl-Pro-Cha-Gly+Cys(Me)-His-Ala-Lys(Fam)-NH2	S		Dab	Pro	Cha	Gly	CyM	His	Ala	LyN	Moss & Rasmussen, 2007
DAAELVAL	AAEL	2913	15.51			Src substrate cortactin	Q60598	1-546	peptide-Pro426+Phe-peptide	N	MS	Asp	Ala	Ala	Pro	Phe	Lys	Ala	Glu	auf dem Keller et al., 2010
DAAPFKAE	AAPF	2628	16.56			decorin	P07585	31-359	peptide-Ser240+Leu-peptide	P		Asp	Ala	Ala	Ser	Leu	Lys	Gly	Leu	Imai et al., 1997	18359
DAASLKGL	AASL	436	29.09			heat shock 70 kDa protein 1	P08107	469-497	peptide-Gly484+Ile-peptide	N	MS	Asp	Ala	Asn	Gly	Ile	Leu	Asn	Val	Schilling & Overall, 2008
DADSLYVE	ADSL	24641	0.47			Nucleolar RNA helicase 2	Q9NR30-2	1-715	QDAQS+LHGDIPQK	N	MS	Asp	Ala	Gln	Ser	Leu	His	Gly	Asp	Schilling & Overall, 2008
DALPYFDQ	ALPY	3456	13.91			Actin, cytoplasmic 1	P60710	2-375	peptide-Arg28+Ala-peptide	N	MS	Asp	Ala	Pro	Arg	Ala	Val	Phe	Pro	auf dem Keller et al., 2010
DANGILNV	ANGI	42917	0.16			heat shock 70 kDa protein 1L	P34931	471-499	peptide-Gly486+Ile-peptide	N	MS	Asp	Ala	Asn	Gly	Ile	Leu	Asn	Val	Schilling & Overall, 2008
DANTIVCN	ANTI	37493	0.21			Aminoacyl tRNA synthase complex-interacting multifunctional protein 1	P31230	1-310	peptide-Ser171+Leu-peptide	N	MS	Asp	Ala	Asp	Ser	Leu	Tyr	Val	Glu	auf dem Keller et al., 2010
DAPRAVFP	APRA	5672	8.31			Actin, aortic smooth muscle	P62737	3-377	peptide-Arg30+Ala-peptide	N	MS	Asp	Ala	Pro	Arg	Ala	Val	Phe	Pro	auf dem Keller et al., 2010
DAQSLHGD	AQSL	2160	18.36			Pre-mRNA-splicing factor SPF27	Q9D287	2-225	peptide-Pro17+Tyr-peptide	N	MS	Asp	Ala	Leu	Pro	Tyr	Phe	Asp	Gln	auf dem Keller et al., 2010
DASSLTVD	ASSL	1444	21.69			interleukin enhancer-binding factor 2	Q12905	328-356	peptide-Tyr338+Leu-peptide	N	MS	Asp	Ala	Ser	Tyr	Leu	Ala	Ser	Glu	Schilling & Overall, 2008
DASYLASE	ASYL	4768	10.38			ubiquitinyl hydrolase-L1	P09936	133-160	peptide-Ala147+Gln-peptide	N	MS	Asp	Ala	Val	Ala	Gln	Glu	Gly	Gln	Schilling & Overall, 2008
DAVAQEGQ	AVAQ	5047	9.68			ubiquitinyl hydrolase-L1	P09936	135-153	NEAIQA+AHDAVAQEGQCR	N	MS	Ala	Ile	Gln	Ala	Ala	His	Asp	Ala	Schilling & Overall, 2008
DCAFMVDN	CAFM	53088	0.1			eukaryotic translation elongation factor 1 alpha 2 variant	Q59GP5	84-105	peptide-Val89+Leu-peptide	N	MS	Asp	Cys	Ala	Val	Leu	Ile	Val	Ala	Schilling & Overall, 2008
DCAVLIVA	CAVL	54656	0.09			elongation factor 1-alpha 2	Q05639	108-129	peptide-Val113+Leu-peptide	N	MS	Asp	Cys	Ala	Val	Leu	Ile	Val	Ala	Schilling & Overall, 2008
DDHDPVDK	DHDP	134355	0			Actin, cytoplasmic 1	P60710	2-375	peptide-Ala6+Ala-peptide	N	MS	Asp	Asp	Ile	Ala	Ala	Leu	Val	Val	auf dem Keller et al., 2010
DDIAALVV	DIAA	43350	0.16			Tubulin alpha-1C chain	P68373	1-449	peptide-Phe202+Met-peptide	N	MS	Asp	Cys	Ala	Phe	Met	Val	Asp	Asn	auf dem Keller et al., 2010
--DDPPSA	-DDP					BBF2H7/FUS protein	Q70T18	74-92	DD+PPSAKAAIDWFDGKEF	N	MS	-	-	Asp	Asp	Pro	Pro	Ser	Ala	Schilling & Overall, 2008
DEANLLTW	EANL	10919	2.23			Glutathione S-transferase Mu 1	P10649	2-218	peptide-Arg32+Tyr-peptide	N	MS	Asp	Glu	Lys	Arg	Tyr	Thr	Met	Gly	auf dem Keller et al., 2010
DEKRYTMG	EKRY	124074	0			Actin, alpha skeletal muscle	P68134	3-377	peptide-Thr8+Ala-peptide	N	MS	Asp	Glu	Thr	Thr	Ala	Leu	Val	Cys	Prudova et al., 2010
DETTALVC	ETTA	75571	0.04			plectin 6	Q6S380	208-227	DGHN+LISLLEVLSGDSLPR	N	MS	Asp	Gly	His	Asn	Leu	Ile	Ser	Leu	Schilling & Overall, 2008
DFAAFVGL	FAAF	3981	12.44			COP9 signalosome complex subunit 8	Q99627	116-146	peptide-Ala135+Phe-peptide	N	MS	Asp	Phe	Ala	Ala	Phe	Val	Gly	Leu	Schilling & Overall, 2008
DFAKIIGN	FAKI	30941	0.3			NAD(P)H dehydrogenase [quinone] 1	P15559	61-77	DPAN+FQYPAESVLAYK	N	MS	Asp	Pro	Ala	Asn	Phe	Gln	Tyr	Pro	Schilling & Overall, 2008
DGHNLISL	GHNL	32697	0.27			plectin 2	Q15149-9	57-76	DGHN+LISLLEVLSGDSLPR	N	MS	Asp	Gly	His	Asn	Leu	Ile	Ser	Leu	Schilling & Overall, 2008
DGKPLEVP	GKPL	19234	0.74			ankyrin repeat and protein kinase domain-containing protein 1	B0YIV3	423-459	peptide-Ala444+Arg-peptide	N	MS	Asp	Gly	Thr	Ala	Arg	Leu	Leu	Leu	Schilling & Overall, 2008
DGTARLLL	GTAR	36712	0.22			Polyadenylate-binding protein-interacting protein 1	Q8VE62	1-400	peptide-Pro332+Phe-peptide	N	MS	Asp	Gly	Val	Pro	Phe	Thr	Ala	Ala	auf dem Keller et al., 2010
DGVPFTAA	GVPF	27974	0.36			40S ribosomal protein S21	P63220	27-45	DHAS+IQMNVAEVDKVTGR	N	MS	Asp	His	Ala	Ser	Ile	Gln	Met	Asn	Schilling & Overall, 2008
DHASIQMN	HASI	2598	16.67			40S ribosomal protein S21	Q9CQR2	1983-01-01	peptide-Ser31+Ile-peptide	N	MS	Asp	His	Ala	Ser	Ile	Gln	Met	Asn	Kleifeld et al., 2010
DHCGIESE	HCGI	125327	0			D-3-phosphoglycerate dehydrogenase	O43175	270-289	ALVDHEN+VISCPHLGASTK	N	MS	Asp	His	Glu	Asn	Val	Ile	Ser	Cys	Schilling & Overall, 2008
DHDAFLGA	HDAF	111749	0			cathepsin B precursor	P07858	314-331	GQDHCG+IESEVVAGIPR	N	MS	Asp	His	Cys	Gly	Ile	Glu	Ser	Glu	Schilling & Overall, 2008
DHENVISC	HENV	145826	0			Actin, cytoplasmic 1	P60710	2-375	peptide-Ala7+Leu-peptide	N	MS	Asp	Ile	Ala	Ala	Leu	Val	Val	Asp	Prudova et al., 2010
DHNKIQAI	HNKI	105665	0			Calumenin	O35887	20-315	peptide-Ala51+Phe-peptide	N	MS	Asp	His	Asp	Ala	Phe	Leu	Gly	Ala	auf dem Keller et al., 2010
DIAALVVD	IAAL	202	31.83			Activated RNA polymerase II transcriptional coactivator p15	P11031	2-127	peptide-Glu87+Tyr-peptide	N	MS	Asp	Ile	Arg	Glu	Tyr	Trp	Met	Asp	auf dem Keller et al., 2010
DIGALNGI	IGAL	110	32.9			cDNA FLJ76077, highly similar to Homo sapiens hydroxymethylbilane synthase	A8K2L0	227-246	DQDILD+LVGVLHDPETLLR	N	MS	Asp	Ile	Leu	Asp	Leu	Val	Gly	Val	Schilling & Overall, 2008
DIKKILDS	IKKI	145428	0			endoplasmin	P14625	328-356	peptide-Pro341+Ile-peptide	N	MS	Asp	Ile	Lys	Pro	Ile	Trp	Gln	Arg	Schilling & Overall, 2008
DIKPIWQR	IKPI	11162	2.14			SNW domain-containing protein 1	Q9CSN1	2-536	peptide-Glu390+Val-peptide	N	MS	Asp	Ile	Ser	Glu	Val	Ile	Ala	Leu	auf dem Keller et al., 2010
DILDLVGV	ILDL	11446	2.04			hydroxymethylbilane synthase	Q0G847	2020-10-29	DQDILD+LVGVLHDPETLLR	N	MS	Asp	Ile	Leu	Asp	Leu	Val	Gly	Val	Schilling & Overall, 2008
DIREYWMD	IREY	6387	6.84			ATP-citrate synthase	P53396	1045-1065	EEADEYIDIGA+LNGIFVLGR	N	MS	Asp	Ile	Gly	Ala	Leu	Asn	Gly	Ile	Schilling & Overall, 2008
DISEVIAL	ISEV	37269	0.21			Elongation factor 1-alpha 1	P10126	1-462	peptide-Leu77+Trp-peptide	N	MS	Asp	Ile	Ser	Leu	Trp	Lys	Phe	Glu	auf dem Keller et al., 2010
DISLWKFE	ISLW	46753	0.13			Protein flightless-1 homolog	Q9JJ28	1-1271	peptide-Tyr600+Ile-peptide	N	MS	Asp	Ile	Ser	Tyr	Ile	Glu	Gly	Gly	auf dem Keller et al., 2010
DISYIEGG	ISYI	2724	16.21			cathepsin B precursor	P10605	18-339	peptide-Tyr54+Leu-peptide	N	MS	Asp	Ile	Ser	Tyr	Leu	Lys	Lys	Leu	Kleifeld et al., 2010
DISYLKKL	ISYL	1002	24.52			heterogeneous nuclear ribonucleoprotein F	P52597	299-316	ATENDIYN+FFSPLNPVR	N	MS	Asp	Ile	Tyr	Asn	Phe	Phe	Ser	Pro	Schilling & Overall, 2008
DIYNFFSP	IYNF	14027	1.36			heterogeneous nuclear ribonucleoprotein H	P31943	299-316	ATENDIYN+FFSPLNPVR	N	MS	Asp	Ile	Tyr	Asn	Phe	Phe	Ser	Pro	Schilling & Overall, 2008
DKNELVQK	KNEL	132601	0			Rho GDP-dissociation inhibitor 1	Q99PT1	2-204	peptide-Asp143+Tyr-peptide	N	MS	Asp	Lys	Thr	Asp	Tyr	Met	Val	Gly	auf dem Keller et al., 2010
DKTDYMVG	KTDY	143217	0			14-3-3 protein zeta/delta	P63101	1-245	peptide-Ala24+Cys-peptide	N	MS	Asp	Met	Ala	Ala	Cys	Met	Lys	Ser	auf dem Keller et al., 2010
DLAALCSE	LAAL	173	32.24			Eukaryotic translation initiation factor 2 subunit 3, X-linked	Q9Z0N1	2-472	peptide-Thr22+Leu-peptide	N	MS	Asp	Leu	Ala	Thr	Leu	Asp	Val	Thr	auf dem Keller et al., 2010
DLATLDVT	LATL	1071	24.06			tubulin beta-4 chain	P04350	223-241	DLNH+LVSATMSGVTTCLR	N	MS	Asp	Leu	Asn	His	Leu	Val	Ser	Ala	Schilling & Overall, 2008
DLGELVGM	LGEL	399	29.44			78 kDa glucose-regulated protein	P20029	20-655	peptide-Thr38+Thr-peptide	N	MS	Asp	Leu	Gly	Thr	Thr	Tyr	Ser	Cys	auf dem Keller et al., 2010
DLGNVTAD	LGNV	5101	9.55			pre-mRNA-processing factor 19	Q9UMS4	135-175	peptide-Glu164+Leu-peptide	N	MS	Asp	Leu	Gly	Glu	Leu	Val	Gly	Met	Schilling & Overall, 2008
DLGRFQTF	LGRF	3427	13.99			Superoxide dismutase [Cu-Zn]	P00441	80-116	peptide-Asn87+Val-peptide	N	MS	Asp	Leu	Gly	Asn	Val	Thr	Ala	Asp	Schilling & Overall, 2008
DLGTTYSC	LGTT	59988	0.08			Heat shock cognate 71 kDa protein	P63017	2-646	peptide-Thr13+Thr-peptide	N	MS	Asp	Leu	Gly	Thr	Thr	Tyr	Ser	Cys	auf dem Keller et al., 2010
DLLNYFAI	LLNY	3121	14.9			Proteasome subunit alpha type-3	O70435	2-255	peptide-Ala12+Ser-peptide	N	MS	Asp	Leu	Ser	Ala	Ser	Thr	Phe	Ser	auf dem Keller et al., 2010
DLNHLVSA	LNHL	3083	15.04			tubulin beta-2C chain	P68371	223-241	DLNH+LVSATMSGVTTCLR	N	MS	Asp	Leu	Asn	His	Leu	Val	Ser	Ala	Schilling & Overall, 2008
DLQGLTVE	LQGL	707	26.56			matrix metallopeptidase-9	P14780	20-707	peptide-Arg106+Phe-peptide	P		Asp	Leu	Gly	Arg	Phe	Gln	Thr	Phe	Fridman et al., 1995	21333
DLQQILES	LQQI	19886	0.69			U4/U6.U5 tri-snRNP-associated protein 1	O43290	252-267	DLQG+LTVEHAIDSFR	N	MS	Asp	Leu	Gln	Gly	Leu	Thr	Val	Glu	Schilling & Overall, 2008
DLSASTFS	LSAS	3658	13.33			membrane-associated progesterone receptor component 1	O00264	136-163	peptide-Asp144+Leu-peptide	N	MS	Asp	Leu	Ser	Asp	Leu	Thr	Ala	Ala	Schilling & Overall, 2008
DLSDLTAA	LSDL	1627	20.76			cofilin-1	P23528	96-112	EDLVF+IFWAPESAPLK	N	MS	Asp	Leu	Val	Phe	Ile	Phe	Trp	Ala	Schilling & Overall, 2008
DLVFIFWA	LVFI	80095	0			cofilin-2	Q9Y281	96-112	EDLVF+IFWAPESAPLK	N	MS	Asp	Leu	Val	Phe	Ile	Phe	Trp	Ala	Schilling & Overall, 2008
DMAACMKS	MAAC	30940	0.3			protein DJ-1	Q99LX0	1-189	peptide-Asn179+Gln-peptide	N	MS	Asp	Met	Ala	Asn	Gln	Val	Lys	Ala	Kleifeld et al., 2010
DMAELTCL	MAEL	867	25.29			STIP1 homology and U box-containing protein 1	Q9WUD1	1-304	peptide-Glu214+Leu-peptide	N	MS	Asp	Met	Asp	Glu	Leu	Phe	Ser	Gln	auf dem Keller et al., 2010
DMANQVKA	MANQ	3591	13.52			myosin-9	P35579	82-102	VEDMAE+LTCLNEASVLHNLK	N	MS	Asp	Met	Ala	Glu	Leu	Thr	Cys	Leu	Schilling & Overall, 2008
DMDELFSQ	MDEL	52245	0.1			thymosin beta-10	P63313	2020-01-17	ADKPDMGE+IASFDKAK	N	MS	Asp	Met	Gly	Glu	Ile	Ala	Ser	Phe	Schilling & Overall, 2008
DMGEIASF	MGEI	4090	12.19			collagen alpha-1(II) chain	P02458	182-1241	peptide-Ala1222+Phe-peptide	P	MS	Asp	Met	Ser	Ala	Phe	Ala	Gly	Leu	Zhen et al., 2008	22945
DMSAFAGL	MSAF	1585	20.95			COP9 signalosome complex subunit 8 isoform 2	Q99627-2	1-160	peptide-Ala86+Phe-peptide	N	MS	Asp	Phe	Ala	Ala	Phe	Val	Gly	Leu	Schilling & Overall, 2008
-DNHLLGT	DNHL	74593	0.04			heat shock protein HSP 90-beta	P08238	411-427	CLE+LFSELAEDKENYK	N	MS	-	Cys	Leu	Glu	Leu	Phe	Ser	Glu	Schilling & Overall, 2008
--DNIQGI	-DNI					fusion	Q59H57	115-133	DD+PPSAKAAIDWFDGKEF	N	MS	-	-	Asp	Asp	Pro	Pro	Ser	Ala	Schilling & Overall, 2008
DNSTLQSE	NSTL	17257	0.9			heterogeneous nuclear ribonucleoproteins A2/B1	P22626	161-173	DDHD+PVDKIVLQKY	N	MS	Asp	Asp	His	Asp	Pro	Val	Asp	Lys	Schilling & Overall, 2008
DPAIYFKE	PAIY	26155	0.41			transketolase	P29401	186-204	LGQSDPAP+LQHQMDIYQK	N	MS	Asp	Pro	Ala	Pro	Leu	Gln	His	Gln	Schilling & Overall, 2008
DPANFQYP	PANF	154	32.44			NQO1 protein	Q3B792	61-77	DPAN+FQYPAESVLAYK	N	MS	Asp	Pro	Ala	Asn	Phe	Gln	Tyr	Pro	Schilling & Overall, 2008
DPAPLQHQ	PAPL	48	34.04			26S proteasome non-ATPase regulatory subunit 12	O00232	419-431	DPNN+LLNDWSQK	N	MS	Asp	Pro	Asn	Asn	Leu	Leu	Asn	Asp	Schilling & Overall, 2008
DPDGYWIE	PDGY	18970	0.76			STIP1 protein	Q3ZCU9	560-577	DPQA+LSEHLKNPVIAQK	N	MS	Asp	Pro	Gln	Ala	Leu	Ser	Glu	His	Schilling & Overall, 2008
DPEAVVSP	PEAV	7022	5.71			putative uncharacterized protein PTD004	Q53SQ6	70-87	YDPGA+LVIPFSGALELK	N	MS	Asp	Pro	Gly	Ala	Leu	Val	Ile	Pro	Schilling & Overall, 2008
DPGALVIP	PGAL	90	33.15			myelin basic protein isoform 1	P04370	1-246	peptide-Asn87+Arg-peptide	P	MS	Asp	Pro	Gly	Asn	Arg	Pro	His	Leu	Shiryaev et al., 2009	25543
DPGKLYTL	PGKL	561	27.98			coronin-7	P57737	348-382	peptide-Ser371+Trp-peptide	N	MS	Asp	Pro	His	Ser	Trp	Trp	Ala	Gly	Schilling & Overall, 2008
DPGLMLMG	PGLM	3003	15.25			Phosphatidylethanolamine-binding protein 1	P70296	2-187	peptide-Lys62+Leu-peptide	N	MS	Asp	Pro	Gly	Lys	Leu	Tyr	Thr	Leu	auf dem Keller et al., 2010
DPGNRPHL	PGNR	49305	0.12			X-ray repair cross-complementing protein 6	P12956	339-357	FDDPGL+MLMGFKPLVLLK	N	MS	Asp	Pro	Gly	Leu	Met	Leu	Met	Gly	Schilling & Overall, 2008
DPHSWWAG	PHSW	2359	17.55			tyrosine-protein phosphatase non-receptor type 23	Q9H3S7	1615-1636	peptide-Ser1625+Leu-peptide	N	MS	Asp	Pro	Leu	Ser	Leu	Leu	Asp	Pro	Schilling & Overall, 2008
DPKACTIL	PKAC	33100	0.27			T-complex protein 1 subunit gamma	P49368	365-382	CKDPKA+CTILLRGASKE	N	MS	Asp	Pro	Lys	Ala	Cys	Thr	Ile	Leu	Schilling & Overall, 2008
DPKRTIAQ	PKRT	118460	0			endoplasmin	P14625	364-384	ESDDPMA+YIHFTAEGEVTFK	N	MS	Asp	Pro	Met	Ala	Tyr	Ile	His	Phe	Schilling & Overall, 2008
DPLSLLDP	PLSL	66	33.53			T-complex protein 1 subunit gamma isoform 2	P49368-2	327-344	CKDPKA+CTILLRGASKE	N	MS	Asp	Pro	Lys	Ala	Cys	Thr	Ile	Leu	Schilling & Overall, 2008
DPMAYIHF	PMAY	402	29.4			fusion	Q59H57	116-132	DPPS+AKAAIDWFDGKE	N	MS	Asp	Pro	Pro	Ser	Ala	Lys	Ala	Ala	Schilling & Overall, 2008
DPNNLLND	PNNL	650	27.06			lactoylglutathione lyase	Q04760	159-179	GLAFIQDPDG+YWIEILNPNK	N	MS	Asp	Pro	Asp	Gly	Tyr	Trp	Ile	Glu	Schilling & Overall, 2008
DPPSAKAA	PPSA	21131	0.62			BBF2H7/FUS protein	Q70T18	75-91	DPPS+AKAAIDWFDGKE	N	MS	Asp	Pro	Pro	Ser	Ala	Lys	Ala	Ala	Schilling & Overall, 2008
DPQALSEH	PQAL	32	34.45			stress-induced-phosphoprotein 1	Q5TZU9	513-530	DPQA+LSEHLKNPVIAQK	N	MS	Asp	Pro	Gln	Ala	Leu	Ser	Glu	His	Schilling & Overall, 2008
DPQILKSD	PQIL	10473	2.44			UPF0027 protein C22orf28 homolog	Q99LF4	1-505	peptide-Ala109+Val-peptide	N	MS	Asp	Pro	Glu	Ala	Val	Val	Ser	Pro	auf dem Keller et al., 2010
DPSGVKVL	PSGV	720	26.43			glyceraldehyde-3-phosphate dehydrogenase	P04406	79-97	RDPSK+IKWGDAGAEYVVE	N	MS	Asp	Pro	Ser	Lys	Ile	Lys	Trp	Gly	Schilling & Overall, 2008
DPSKIKWG	PSKI	1113	23.8			Heat shock protein HSP 90-beta	P11499	2-724	peptide-Lys64+Leu-peptide	N	MS	Asp	Pro	Ser	Lys	Leu	Asp	Ser	Gly	Prudova et al., 2010
DPSKLDSG	PSKL	176	32.22			myelin basic protein isoform 1	P04370	1-246	peptide-Ala126+Ala-peptide	P	MS	Asp	Pro	Thr	Ala	Ala	Ser	Gly	Gly	Shiryaev et al., 2009	25545
DPTAASGG	PTAA	24708	0.46			Glutathione peroxidase 1	P11352	1-201	peptide-Ala140+Leu-peptide	N	MS	Asp	Pro	Thr	Ala	Leu	Met	Thr	Asp	auf dem Keller et al., 2010
DPTALMTD	PTAL	114	32.89			filamin-A	Q8BTM8	2647-02-01	peptide-Gly425+Gln-peptide	N	MS	Asp	Pro	Thr	Gly	Gln	Lys	Gly	Thr	Kleifeld et al., 2010
DPTGQKGT	PTGQ	3424	13.99			Tubulin beta-5 chain	P99024	1-444	peptide-Gly34+Thr-peptide	N	MS	Asp	Pro	Thr	Gly	Thr	Tyr	His	Gly	auf dem Keller et al., 2010
DPTGTYHG	PTGT	78080	0.04			Splicing factor 3B subunit 1	Q99NB9	1-1304	peptide-Pro258+Ser-peptide	N	MS	Asp	Pro	Thr	Pro	Ser	His	Thr	Pro	auf dem Keller et al., 2010
DPTPSHTP	PTPS	15473	1.12			ubiquitin-specific peptidase 10	Q14694	384-405	peptide-Ala393+Ile-peptide	N	MS	Asp	Pro	Val	Ala	Ile	Lys	Ile	Ala	Schilling & Overall, 2008
DPVAIKIA	PVAI	150	32.49			40S ribosomal protein S3	P62908	2-243	peptide-Asn165+Tyr-peptide	N	MS	Asp	Pro	Val	Asn	Tyr	Tyr	Val	Asp	auf dem Keller et al., 2010
DPVNYYVD	PVNY	516	28.32			Galectin-1	P16045	2-135	peptide-Asn41+Leu-peptide	N	MS	Asp	Ser	Asn	Asn	Leu	Cys	Leu	His	auf dem Keller et al., 2010
DQENLVGT	QENL	127809	0			ubiquitin-conjugating enzyme E2 L3	P68036	23-48	peptide-Asn31+Leu-peptide	N	MS	Asp	Glu	Ala	Asn	Leu	Leu	Thr	Trp	Schilling & Overall, 2008
DQNPYYGG	QNPY	91047	0			Mitotic checkpoint protein BUB3	Q9WVA3	1-326	peptide-Asn90+Leu-peptide	N	MS	Asp	Gln	Glu	Asn	Leu	Val	Gly	Thr	auf dem Keller et al., 2010
DREDLVYQ	REDL	50712	0.11			Dentin matrix acidic phosphoprotein 1	P98193	17-489	peptide-Glu260+Leu-peptide	P	AB	Asp	Arg	Gly	Glu	Leu	Ala	Asp	Ser	Chaussain et al., 2009
DRGELADS	RGEL	3096	15			serine/threonine-protein phosphatase 2A 65 kDa regulatory subunit A alpha isoform	P30153	546-566	IGPILDNST+LQSEVKPILEK	N	MS	Asp	Asn	Ser	Thr	Leu	Gln	Ser	Glu	Schilling & Overall, 2008
DSNNLCLH	SNNL	8299	4.06			WD repeat-containing protein 61	Q9GZS3	100-129	peptide-Tyr120+Leu-peptide	N	MS	Asp	Ser	Gln	Tyr	Leu	Ala	Thr	Gly	Schilling & Overall, 2008
DSQYLATG	SQYL	4602	10.84			DNA repair protein complementing XP-G cells	P28715	555-568	FDSSL+LSSDDETK	N	MS	Asp	Ser	Ser	Leu	Leu	Ser	Ser	Asp	Schilling & Overall, 2008
DSSLLSSD	SSLL	20194	0.68			60S acidic ribosomal protein P2	P99027	1-115	peptide-Gly31+Ile-peptide	N	MS	Asp	Ser	Val	Gly	Ile	Glu	Ala	Asp	auf dem Keller et al., 2010
DSVGIEAD	SVGI	57350	0.09			Filamin-B	Q80X90	2602-01-01	peptide-Gly1230+Ile-peptide	N	MS	Asp	Thr	Ser	Gly	Ile	Lys	Ala	Phe	auf dem Keller et al., 2010
DTSGIKAF	TSGI	13490	1.46			Glutaredoxin-related protein 5, mitochondrial	Q80Y14	32-152	peptide-Ala83+Tyr-peptide	N	MS	Asp	Tyr	Ala	Ala	Tyr	Asn	Val	Leu	auf dem Keller et al., 2010
DVAGVIEA	VAGV	3038	15.16			heat shock 70 kDa protein 1	P08107	384-415	peptide-Pro398+Leu-peptide	N	MS	Asp	Val	Ala	Pro	Leu	Ser	Leu	Gly	Schilling & Overall, 2008
DVANYNFF	VANY	578	27.75			quinone oxidoreductase	Q08257	62-88	peptide-Gly75+Val-peptide	N	MS	Asp	Val	Ala	Gly	Val	Ile	Glu	Ala	Schilling & Overall, 2008
DVAPLSLG	VAPL	344	30.04			heat shock 70 kDa protein 1L	P34931	389-417	peptide-Pro400+Leu-peptide	N	MS	Asp	Val	Ala	Pro	Leu	Ser	Leu	Gly	Schilling & Overall, 2008
DVGEYNVF	VGEY	3547	13.68			Protein disulfide-isomerase A3	P27773	25-505	peptide-Glu29+Leu-peptide	N	MS	Asp	Val	Leu	Glu	Leu	Thr	Asp	Glu	auf dem Keller et al., 2010
DVGQTVDD	VGQT	110812	0			matrix metallopeptidase-13	P45452	20-471	peptide-Glu103+Tyr-peptide	P		Asp	Val	Gly	Glu	Tyr	Asn	Val	Phe	Knauper et al., 1996	17962
DVLELTDE	VLEL	6871	5.96			14-3-3 protein zeta/delta	P63104	91-115	peptide-Ser99+Leu-peptide	N	MS	Asp	Val	Leu	Ser	Leu	Leu	Glu	Lys	Schilling & Overall, 2008
DVLSLLEK	VLSL	4594	10.85			bifunctional purine biosynthesis protein PURH	P31939	49-64	DVSE+LTGFPEMLGGR	N	MS	Asp	Val	Ser	Glu	Leu	Thr	Gly	Phe	Schilling & Overall, 2008
DVQMLQDA	VQML	2067	18.73			Cofilin-1	P18760	2-166	peptide-Gln62+Thr-peptide	N	MS	Asp	Val	Gly	Gln	Thr	Val	Asp	Asp	auf dem Keller et al., 2010
DVRAAVYQ	VRAA	11612	1.98			F-actin-capping protein subunit alpha-2	P47754	2-286	peptide-Leu38+Leu-peptide	N	MS	Asp	Val	Arg	Leu	Leu	Leu	Asn	Asn	auf dem Keller et al., 2010
DVRLLLNN	VRLL	8347	4			F-actin-capping protein subunit alpha-1	P47753	2-286	peptide-Leu38+Leu-peptide	N	MS	Asp	Val	Arg	Leu	Leu	Leu	Asn	Asn	auf dem Keller et al., 2010
DVSELTGF	VSEL	1067	24.1			Proteasome subunit alpha type-1	Q9R1P4	1-263	peptide-Pro231+Phe-peptide	N	MS	Asp	Val	Ser	Pro	Phe	Leu	Asp	Gly	auf dem Keller et al., 2010
DVSPFLDG	VSPF	2802	15.9			metallothionein-1X	P80297	43-61	CAQG+CICKGTSDKCSCCA	N	MS	Cys	Ala	Gln	Gly	Cys	Ile	Cys	Lys	Schilling & Overall, 2008
DYAAYNVL	YAAY	1500	21.37			vacuolar ATP synthase catalytic subunit A	P38606	598-613	SDYAQ+LLEDMQNAFR	N	MS	Asp	Tyr	Ala	Gln	Leu	Leu	Glu	Asp	Schilling & Overall, 2008
DYAHQHGI	YAHQ	18418	0.8			Peroxiredoxin-1	P35700	1-199	peptide-Val118+Leu-peptide	N	MS	Asp	Tyr	Gly	Val	Leu	Lys	Ala	Asp	Prudova et al., 2010
DYAQLLED	YAQL	2871	15.63			cathepsin X precursor	Q9UBR2	110-160	peptide-His145+Gln-peptide	N	MS	Asp	Tyr	Ala	His	Gln	His	Gly	Ile	Schilling & Overall, 2008
DYGVLKAD	YGVL	9732	2.89			matrix metallopeptidase-2	P08253	30-660	peptide-Asn80+Tyr-peptide	P		Asp	Val	Ala	Asn	Tyr	Asn	Phe	Phe	Crabbe et al., 1993	16542
EAAALKAY	AAAL	238	31.4			cDNA FLJ77695, highly similar to Homo sapiens chaperonin containing TCP1, subunit 7	A8K7E6	499-524	peptide-Cys511+Leu-peptide	N	MS	Glu	Ala	Ala	Cys	Leu	Ile	Val	Ser	Schilling & Overall, 2008
EAACLIVS	AACL	18408	0.8			chaperonin containing TCP1, subunit 7	Q53HV2	499-524	peptide-Cys511+Leu-peptide	N	MS	Glu	Ala	Ala	Cys	Leu	Ile	Val	Ser	Schilling & Overall, 2008
EAAQLLED	AAQL	2103	18.59			Importin subunit beta-1	P70168	1-896	peptide-Pro841+Met-peptide	N	MS	Glu	Ala	Arg	Pro	Met	Ile	His	Glu	auf dem Keller et al., 2010
EAEEWYKS	AEEW	138894	0			poly [ADP-ribose] polymerase 1	P09874	79-117	peptide-Gly93+Val-peptide	N	MS	Glu	Ala	Gly	Gly	Val	Thr	Gly	Lys	Schilling & Overall, 2008
EAFEISKK	AFEI	109113	0			transketolase	P29401	205-226	peptide-Gly210+Trp-peptide	N	MS	Glu	Ala	Phe	Gly	Trp	His	Ala	Ile	Schilling & Overall, 2008
EAFGWHAI	AFGW	7901	4.53			CADM1 protein	A0A4Z1	311-326	RCEASN+IVGKAHSDY	N	MS	Glu	Ala	Ser	Asn	Ile	Val	Gly	Lys	Schilling & Overall, 2008
EAGFLAEA	AGFL	5440	8.79			inhibitor of nuclear factor kappa-B kinase subunit beta	O14920	704-728	peptide-Asn714+Leu-peptide	N	MS	Glu	Ala	His	Asn	Leu	Cys	Thr	Leu	Schilling & Overall, 2008
EAGGVTGK	AGGV	76127	0.04			transketolase	P29401	75-101	peptide-Phe91+Leu-peptide	N	MS	Glu	Ala	Gly	Phe	Leu	Ala	Glu	Ala	Schilling & Overall, 2008
EAHNLCTL	AHNL	1131	23.71			galectin-1	P16045	2-135	peptide-Asn119+Tyr-peptide	N	MS	Glu	Ala	Ile	Asn	Tyr	Met	Ala	Ala	Kleifeld et al., 2010
EAINYMAA	AINY	4133	12.08			nucleophosmin	Q61937	1-292	peptide-Asn66+Tyr-peptide	N	MS	Glu	Ala	Met	Asn	Tyr	Glu	Gly	Ser	Kleifeld et al., 2010
-EALLSSA	EALL	54156	0.1			elongation factor 1-alpha 1	P68104	134-146	EHA+LLAYTLGVK	N	MS	-	Glu	His	Ala	Leu	Leu	Ala	Tyr	Schilling & Overall, 2008
EAMNYEGS	AMNY	5298	9.12			14-3-3 protein zeta/delta	P63101	1-245	peptide-Glu154+Ile-peptide	N	MS	Glu	Ala	Phe	Glu	Ile	Ser	Lys	Lys	auf dem Keller et al., 2010
EANHLLHE	ANHL	4812	10.28			glucosidase 2 subunit beta precursor	P14314	219-271	peptide-Ala255+Leu-peptide	N	MS	Glu	Ala	Gln	Ala	Leu	Leu	Ser	Gly	Schilling & Overall, 2008
-EANLLNA	EANL	10919	2.23			T-complex protein 1 subunit beta	P78371	138-154	EAL+LSSAVDHGSDEVK	N	MS	-	Glu	Ala	Leu	Leu	Ser	Ser	Ala	Schilling & Overall, 2008
EAQALLSG	AQAL	1270	22.74			Splicing factor 3A subunit 3	Q9D554	1-501	peptide-Asn126+Leu-peptide	N	MS	Glu	Ala	Gln	Asn	Leu	Val	Glu	Phe	auf dem Keller et al., 2010
EAQGIKAD	AQGI	6756	6.15			EIF5B protein	Q05CQ1	67-91	peptide-Gly71+Ile-peptide	N	MS	Glu	Ala	Gln	Gly	Ile	Lys	Ala	Asp	Schilling & Overall, 2008
EAQNLVEF	AQNL	1910	19.46			EIF5B protein	A0JLR8	67-91	peptide-Gly71+Ile-peptide	N	MS	Glu	Ala	Gln	Gly	Ile	Lys	Ala	Asp	Schilling & Overall, 2008
EARPMIHE	ARPM	1419	21.87			Reticulocalbin-3	Q8BH97	21-328	peptide-His284+Leu-peptide	N	MS	Glu	Ala	Asn	His	Leu	Leu	His	Glu	auf dem Keller et al., 2010
EASNIVGK	ASNI	2102	18.59			Cell adhesion molecule 1	Q9BY67	312-326	RCEASN+IVGKAHSDY	N	MS	Glu	Ala	Ser	Asn	Ile	Val	Gly	Lys	Schilling & Overall, 2008
EAVAYGAA	AVAY	971	24.71			heat shock 70 kDa protein 1L	P34931	363-386	peptide-Ala372+Tyr-peptide	N	MS	Glu	Ala	Val	Ala	Tyr	Gly	Ala	Ala	Schilling & Overall, 2008
EAVEWQQK	AVEW	51377	0.11			tropomyosin 3, gamma	Q8K0Z5	1-284	peptide-Ala134+Leu-peptide	N	MS	Glu	Asn	Arg	Ala	Leu	Lys	Asp	Glu	Kleifeld et al., 2010
ECNQCKAP	CNQC	152016	0			coatomer subunit beta	P53618	618-633	VLSECSP+LMNDIFNK	N	MS	Glu	Cys	Ser	Pro	Leu	Met	Asn	Asp	Schilling & Overall, 2008
ECSPLMND	CSPL	11094	2.17			14-3-3 protein epsilon	P62259	1-255	peptide-Asn43+Leu-peptide	N	MS	Glu	Glu	Arg	Asn	Leu	Leu	Ser	Val	auf dem Keller et al., 2010
--EDLHDM	-EDL					Myosin regulatory light chain 12B	O14950	52-63	ED+LHDMLASLGK	N	MS	-	-	Glu	Asp	Leu	His	Asp	Met	Schilling & Overall, 2008
--EDLVFI	-EDL					cofilin-2	Q9Y281	96-112	ED+LVFIFWAPESAPLK	N	MS	-	-	Glu	Asp	Leu	Val	Phe	Ile	Schilling & Overall, 2008
EDRNLLSV	DRNL	25232	0.44			fusion	Q59H57	215-246	peptide-Gln220+Cys-peptide	N	MS	Glu	Cys	Asn	Gln	Cys	Lys	Ala	Pro	Schilling & Overall, 2008
EERNLLSV	ERNL	75008	0.04			14-3-3 protein gamma	P61982	1-247	peptide-Asn43+Leu-peptide	N	MS	Glu	Glu	Arg	Asn	Leu	Leu	Ser	Val	auf dem Keller et al., 2010
EFASFEDA	FASF	6148	7.36			myristoylated alanine-rich C-kinase substrate	P29966	87-105	GEPAA+AAAPEAGASPVEK	N	MS	Glu	Pro	Ala	Ala	Ala	Ala	Ala	Pro	Schilling & Overall, 2008
EGAELVDA	GAEL	32219	0.28			cDNA, FLJ95457, highly similar to Homo sapiens tubulin, beta, 4	B2RBD5	103-121	GHYTEGAE+LVDSVLDVVR	N	MS	Glu	Gly	Ala	Glu	Leu	Val	Asp	Ser	Schilling & Overall, 2008
EGAELVDS	GAEL	32219	0.28			tubulin, beta, 4 variant	Q53G92	103-121	GHYTEGAE+LVDSVLDVVR	N	MS	Glu	Gly	Ala	Glu	Leu	Val	Asp	Ser	Schilling & Overall, 2008
EGAGVVVA	GAGV	59005	0.08			syndecan-4	P31431	19-198	peptide-Tyr37+Phe-peptide	P	NT	Glu	Gly	Arg	Tyr	Phe	Ser	Gly	Ala	Manon-Jensen et al., 2013
EGERLIGD	GERL	73912	0.04			Triosephosphate isomerase	P17751	2-299	peptide-Gly123+Val-peptide	N	MS	Glu	Gly	Leu	Gly	Val	Ile	Ala	Cys	auf dem Keller et al., 2010
EGLGVIAC	GLGV	56799	0.09			lamina-associated polypeptide 2 isoform alpha	P42166	290-315	peptide-Ala302+Met-peptide	N	MS	Glu	His	Ser	Ala	Met	Leu	Val	Ser	Schilling & Overall, 2008
EGRYFSGA	GRYF	81879	0			78 kDa glucose-regulated protein	P20029	20-655	peptide-Arg75+Leu-peptide	N	MS	Glu	Gly	Glu	Arg	Leu	Ile	Gly	Asp	auf dem Keller et al., 2010
-EHALLAY	EHAL	73960	0.04			Putative elongation factor 1-alpha-like 3	Q5VTE0	134-146	EHA+LLAYTLGVK	N	MS	-	Glu	His	Ala	Leu	Leu	Ala	Tyr	Schilling & Overall, 2008
EHSAMLVS	HSAM	2282	17.84			tubulin alpha-8 chain	Q9NY65	166-214	peptide-Asp199+Cys-peptide	N	MS	Glu	His	Ser	Asp	Cys	Ala	Phe	Met	Schilling & Overall, 2008
EHSDCAFM	HSDC	109186	0			tubulin alpha-4A chain	P68366	166-214	peptide-Asp199+Cys-peptide	N	MS	Glu	His	Ser	Asp	Cys	Ala	Phe	Met	Schilling & Overall, 2008
EIAALVID	IAAL	202	31.83			actin, gamma, cytoplasmic 1	B1ATY1	1-153	peptide-Ala7+Leu-peptide	N	MS	Glu	Ile	Ala	Ala	Leu	Val	Ile	Asp	Kleifeld et al., 2010
EIAEAYLG	IAEA	66903	0.05			Reticulocalbin-1	Q05186	24-325	peptide-His265+Trp-peptide	N	MS	Glu	Ile	Arg	His	Trp	Ile	Leu	Pro	auf dem Keller et al., 2010
EIESFFEG	IESF	81510	0			cDNA, FLJ92534, highly similar to Homo sapiens heat shock 60kDa protein 1	B2R5M6	180-192	EIGN+IISDAMKK	N	MS	Glu	Ile	Gly	Asn	Ile	Ile	Ser	Asp	Schilling & Overall, 2008
EIGNIISD	IGNI	781	25.99			putative uncharacterized protein HSPD1	Q53SE2	180-192	EIGN+IISDAMKK	N	MS	Glu	Ile	Gly	Asn	Ile	Ile	Ser	Asp	Schilling & Overall, 2008
EIGNLLHP	IGNL	39	34.24			Ran-specific GTPase-activating protein	P34022	2-203	peptide-Thr40+Leu-peptide	N	MS	Glu	Ile	Lys	Thr	Leu	Glu	Glu	Asp	auf dem Keller et al., 2010
EIKTLEED	IKTL	25515	0.43			golgin subfamily B member 1	Q14789	716-730	EISN+LNQLIEEFKK	N	MS	Glu	Ile	Ser	Asn	Leu	Asn	Gln	Leu	Schilling & Overall, 2008
EIQELQAQ	IQEL	4664	10.69			78 kDa glucose-regulated protein	P20029	20-655	peptide-Ser312+Phe-peptide	N	MS	Glu	Ile	Glu	Ser	Phe	Phe	Glu	Gly	auf dem Keller et al., 2010
EIRHWILP	IRHW	4036	12.33			vimentin	P20152	2-466	peptide-Glu244+Leu-peptide	N	MS	Glu	Ile	Gln	Glu	Leu	Gln	Ala	Gln	Kleifeld et al., 2010
EISDIVIK	ISDI	7380	5.19			14-3-3 protein zeta/delta	P63101	1-245	peptide-Lys157+Lys-peptide	N	MS	Glu	Ile	Ser	Lys	Lys	Glu	Met	Gln	auf dem Keller et al., 2010
EISKKEMQ	ISKK	33772	0.25			Protein phosphatase 1G	Q61074	1-542	peptide-Arg373+Ile-peptide	N	MS	Glu	Leu	Ala	Arg	Ile	Lys	Asn	Ala	auf dem Keller et al., 2010
EISNLNQL	ISNL	61	33.67			phenylalanyl-tRNA synthetase beta chain	Q9NSD9	475-494	EISD+IVIKDSNTDVGAKNY	N	MS	Glu	Ile	Ser	Asp	Ile	Val	Ile	Lys	Schilling & Overall, 2008
ELADLFVN	LADL	810	25.7			protein phosphatase 1G	O15355	112-128	ELAQ+IAGRPTEDEDEK	N	MS	Glu	Leu	Ala	Gln	Ile	Ala	Gly	Arg	Schilling & Overall, 2008
ELAEQLGL	LAEQ	4850	10.18			Ezrin	P26040	2-586	peptide-Glu423+Tyr-peptide	N	MS	Glu	Leu	Ala	Glu	Tyr	Thr	Ala	Lys	Prudova et al., 2010
ELAEYTAK	LAEY	2670	16.37			peroxiredoxin-6	P30041	108-125	ELAI+LLGMLDPAEKDEK	N	MS	Glu	Leu	Ala	Ile	Leu	Leu	Gly	Met	Schilling & Overall, 2008
ELAILLGM	LAIL	25689	0.43			SPARC	P09486	18-303	peptide-Pro254+Leu-peptide	P		Glu	Leu	Ala	Pro	Leu	Arg	Ala	Pro	Sasaki et al., 1997	18262
ELAPLRAP	LAPL	227	31.56			Splicing factor 3A subunit 3	Q9D554	1-501	peptide-Ala74+Ile-peptide	N	MS	Glu	Leu	Asn	Ala	Ile	Ser	Gly	Pro	auf dem Keller et al., 2010
ELAQIAGR	LAQI	2320	17.71			fatty acid synthase	P49327	1187-1208	peptide-Gln1200+Val-peptide	N	MS	Glu	Leu	Ala	Gln	Val	Leu	Ala	Gln	Schilling & Overall, 2008
ELAQVLAQ	LAQV	56432	0.09			eukaryotic translation initiation factor 3 subunit G	O75821	180-209	peptide-Glu184+Gln-peptide	N	MS	Glu	Leu	Ala	Glu	Gln	Leu	Gly	Leu	Schilling & Overall, 2008
ELARIKNA	LARI	3688	13.24			glycyl-tRNA synthetase	P41250	236-264	peptide-Asp256+Leu-peptide	N	MS	Glu	Leu	Ala	Asp	Leu	Phe	Val	Asn	Schilling & Overall, 2008
ELDYFVVF	LDYF	65315	0.06			insulin-like growth factor 2 mRNA-binding protein 1	Q9NZI8	508-525	TVNELQN+LTAAEVVVPR	N	MS	Glu	Leu	Gln	Asn	Leu	Thr	Ala	Ala	Schilling & Overall, 2008
ELEALKTE	LEAL	4051	12.3			karatin, type II cytoskeletal 8	P05787	160-176	LEAELGN+MQGLVEDFK	N	MS	Glu	Leu	Gly	Asn	Met	Gln	Gly	Leu	Schilling & Overall, 2008
ELGNMQGL	LGNM	408	29.28			CAD protein	P27708	571-592	peptide-Ala576+Leu-peptide	N	MS	Glu	Leu	Ser	Ala	Leu	Val	Ala	Pro	Schilling & Overall, 2008
ELNAISGP	LNAI	7065	5.64			phosphoglucomutase-2	Q96G03	586-604	ELNE+LVSAIEEHFFQPQK	N	MS	Glu	Leu	Asn	Glu	Leu	Val	Ser	Ala	Schilling & Overall, 2008
ELNELVSA	LNEL	18321	0.81			fatty acid synthase	P49327	2007-2026	EACPELDY+FVVFSSVSCGR	N	MS	Glu	Leu	Asp	Tyr	Phe	Val	Val	Phe	Schilling & Overall, 2008
ELQELVQY	LQEL	3965	12.49			myosin-9	P35579	1135-1162	peptide-Ala1143+Leu-peptide	N	MS	Glu	Leu	Glu	Ala	Leu	Lys	Thr	Glu	Schilling & Overall, 2008
ELQNLTAA	LQNL	600	27.52			transitional endoplasmic reticulum ATPase	P55072	487-502	ELQE+LVQYPVEHPDK	N	MS	Glu	Leu	Gln	Glu	Leu	Val	Gln	Tyr	Schilling & Overall, 2008
ELSALVAP	LSAL	112	32.9			Lamin-B1	P14733	2-588	peptide-Gly78+Leu-peptide	N	MS	Glu	Leu	Thr	Gly	Leu	Lys	Ala	Leu	auf dem Keller et al., 2010
ELTGLKAL	LTGL	5984	7.71			plasminogen	P00747	20-810	peptide-Pro372+Val-peptide	P	NT	Glu	Leu	Thr	Pro	Val	Val	Gln	Asp	Cornelius et al., 1998
ELTPVVQD	LTPV	31249	0.3			Heterogeneous nuclear ribonucleoprotein H2	P70333	1-449	peptide-Trp95+Val-peptide	N	MS	Glu	Met	Asp	Trp	Val	Leu	Lys	His	auf dem Keller et al., 2010
EMDWVLKH	MDWV	82364	0			Heterogeneous nuclear ribonucleoprotein H	O35737	1-449	peptide-Trp95+Val-peptide	N	MS	Glu	Met	Asp	Trp	Val	Leu	Lys	His	auf dem Keller et al., 2010
ENGALLSW	NGAL	5616	8.44			14-3-3 protein eta	P68510	2-246	peptide-Asn43+Leu-peptide	N	MS	Glu	Asp	Arg	Asn	Leu	Leu	Ser	Val	auf dem Keller et al., 2010
ENQHLVSP	NQHL	25457	0.44			cDNA, FLJ92904, highly similar to Homo sapiens casein kinase 2, alpha 1 polypeptide	B2R6D7	287-303	ENQH+LVSPEALDFLDK	N	MS	Glu	Asn	Gln	His	Leu	Val	Ser	Pro	Schilling & Overall, 2008
ENRALKDE	NRAL	2569	16.75			casein kinase II alpha subunit	Q8NEV1	287-303	ENQH+LVSPEALDFLDK	N	MS	Glu	Asn	Gln	His	Leu	Val	Ser	Pro	Schilling & Overall, 2008
EPAAAAAP	PAAA	1592	20.91			macrophage-capping protein	P40121	205-231	peptide-Glu219+Met-peptide	N	MS	Glu	Pro	Ala	Glu	Met	Ile	Gln	Val	Schilling & Overall, 2008
EPAEMIQV	PAEM	926	24.94			RNA pseudouridylate synthase domain-containing protein 2	Q8IZ73	77-98	peptide-Pro83+Val-peptide	N	MS	Glu	Pro	Ala	Pro	Val	Gly	Gly	Glu	Schilling & Overall, 2008
EPAPVGGE	PAPV	889	25.16			tryptophanyl-tRNA synthetase, cytoplasmic	P23381	2020-01-24	peptide-Ser8+Leu-peptide	N	MS	Glu	Pro	Ala	Ser	Leu	Leu	Glu	Leu	Schilling & Overall, 2008
EPASLKEE	PASL	2	36.43			CAST protein	Q6AZE3	297-327	peptide-Thr316+Leu-peptide	N	MS	Glu	Pro	Ala	Thr	Leu	Lys	Gly	Thr	Schilling & Overall, 2008
EPASLLEL	PASL	2	36.43			myosin-9	P35579	38-63	peptide-Ser45+Leu-peptide	N	MS	Glu	Pro	Ala	Ser	Leu	Lys	Glu	Glu	Schilling & Overall, 2008
EPATLKGT	PATL	138	32.62			calpastatin isoform 4	P20810-4	364-394	peptide-Thr383+Leu-peptide	N	MS	Glu	Pro	Ala	Thr	Leu	Lys	Gly	Thr	Schilling & Overall, 2008
EPATMASA	PATM	416	29.22			myocyte enhancer factor 2D/deleted in azoospermia associated protein 1 fusion protein	Q5IRN4	242-273	peptide-Asp259+Ser-peptide	N	MS	Glu	Pro	Arg	Asp	Ser	Lys	Ser	Gln	Schilling & Overall, 2008
EPCALCSL	PCAL	2698	16.29			Chromobox protein homolog 3	P23198	1-183	peptide-Glu29+Phe-peptide	N	MS	Glu	Pro	Glu	Glu	Phe	Val	Val	Glu	auf dem Keller et al., 2010
EPCAQLSI	PCAQ	84018	0			D-dopachrome decarboxylase-like protein	A6NHG4	43-75	peptide-Ala58+Gln-peptide	N	MS	Glu	Pro	Cys	Ala	Gln	Leu	Ser	Ile	Schilling & Overall, 2008
EPEEFVVE	PEEF	87751	0			baculoviral IAP repeat-containing protein 6	Q9NR09	4464-4483	PDASDQEPEG+LTLLVPDIQK	N	MS	Glu	Pro	Glu	Gly	Leu	Thr	Leu	Leu	Schilling & Overall, 2008
EPEGLTLL	PEGL	393	29.5			aspartate aminotransferase, cytoplasmic	P17174	276-290	EPES+ILQVLSQMEK	N	MS	Glu	Pro	Glu	Ser	Ile	Leu	Gln	Val	Schilling & Overall, 2008
EPESILQV	PESI	3543	13.68			collagen alpha-1(II) chain	P02458	182-1241	peptide-Lys1006+Gln-peptide	P	MS	Glu	Pro	Gly	Lys	Gln	Gly	Ala	Pro	Zhen et al., 2008	22913
EPGKQGAP	PGKQ	38075	0.2			chromodomain helicase DNA binding protein 1	Q17RZ3	998-1020	peptide-Pro1008+Leu-peptide	N	MS	Glu	Pro	Gly	Pro	Leu	Thr	Val	Gly	Schilling & Overall, 2008
EPGPLTVG	PGPL	256	31.15			bifunctional aminoacyl-tRNA synthetase	P07814	1109-1132	peptide-Ala1117+Ile-peptide	N	MS	Glu	Pro	Ile	Ala	Ile	Arg	Pro	Thr	Schilling & Overall, 2008
EPIAIRPT	PIAI	316	30.41			katanin p80 WD40-containing subunit B1	Q9BVA0	451-481	peptide-Gly464+Leu-peptide	N	MS	Glu	Pro	Ile	Gly	Leu	Lys	Ala	Ser	Schilling & Overall, 2008
EPIGLKAS	PIGL	37	34.3			katanin p80 subunit B 1 variant	Q59G59	214-244	peptide-Gly227+Leu-peptide	N	MS	Glu	Pro	Ile	Gly	Leu	Lys	Ala	Ser	Schilling & Overall, 2008
EPKKLEEN	PKKL	5768	8.1			adipocyte plasma membrane-associated protein	Q9HDC9	73-87	EPPL+LLGVLHPNTK	N	MS	Glu	Pro	Pro	Leu	Leu	Leu	Gly	Val	Schilling & Overall, 2008
EPKRAVAR	PKRA	96552	0			syndecan-4	P31431	19-198	peptide-Lys105+Leu-peptide	P	NT	Glu	Pro	Lys	Lys	Leu	Glu	Glu	Asn	Manon-Jensen et al., 2013
EPLAIGKS	PLAI	58	33.76			T-complex protein 1 subunit gamma isoform 2	P49368-2	454-473	LGIWEPLA+VKLQTYKTAVE	N	MS	Glu	Pro	Leu	Ala	Val	Lys	Leu	Gln	Schilling & Overall, 2008
EPLAVKLQ	PLAV	427	29.15			T-complex protein 1 subunit gamma	P49368	492-511	LGIWEPLA+VKLQTYKTAVE	N	MS	Glu	Pro	Leu	Ala	Val	Lys	Leu	Gln	Schilling & Overall, 2008
EPNDYFTN	PNDY	17692	0.86			D-dopachrome decarboxylase	P30046	43-75	peptide-Ala58+Gln-peptide	N	MS	Glu	Pro	Cys	Ala	Gln	Leu	Ser	Ile	Schilling & Overall, 2008
EPPLLLGV	PPLL	42699	0.16			importin subunit beta-1	Q14974	184-203	EPSN+NVKLAATNALLNSLE	N	MS	Glu	Pro	Ser	Asn	Asn	Val	Lys	Leu	Schilling & Overall, 2008
EPRDSKSQ	PRDS	24520	0.47			tyrosyl-tRNA synthetase, cytoplasmic	P54577	396-414	AEPRT+VVSGLVQFVPKEE	N	MS	Glu	Pro	Arg	Thr	Val	Val	Ser	Gly	Schilling & Overall, 2008
EPRTVVSG	PRTV	11579	1.99			H-2 class I histocompatibility antigen, D-B alpha chain	P01899	25-362	peptide-Tyr46+Ile-peptide	N	MS	Glu	Pro	Arg	Tyr	Ile	Ser	Val	Gly	auf dem Keller et al., 2010
EPRYISVG	PRYI	914	25			H-2 class I histocompatibility antigen, L-D alpha chain	P01897	25-362	peptide-Tyr46+Ile-peptide	N	MS	Glu	Pro	Arg	Tyr	Ile	Ser	Val	Gly	auf dem Keller et al., 2010
EPSNNVKL	PSNN	13876	1.39			desmin	P31001	2-469	peptide-Arg149+Val-peptide	N	MS	Glu	Pro	Thr	Arg	Val	Ala	Glu	Leu	Kleifeld et al., 2010
EPTGLEAT	PTGL	94	33.11			Filamin-B	Q80X90	2602-01-01	peptide-His764+Phe-peptide	N	MS	Glu	Pro	Thr	His	Phe	Thr	Val	Asp	auf dem Keller et al., 2010
EPTHFTVD	PTHF	3229	14.62			lamina-associated polypeptide 2 isoform alpha	P42166	71-86	EPTP+VLGSGAAAAGR	N	MS	Glu	Pro	Thr	Pro	Val	Leu	Gly	Ser	Schilling & Overall, 2008
EPTPVLGS	PTPV	3623	13.43			Coatomer subunit gamma	Q9QZE5	1-874	peptide-Ala638+Leu-peptide	N	MS	Glu	Pro	Val	Ala	Leu	Thr	Glu	Ser	auf dem Keller et al., 2010
EPTRVAEL	PTRV	56093	0.09			syndecan-1	P18827	23-310	peptide-Gly82+Leu-peptide	P	NT	Glu	Pro	Thr	Gly	Leu	Glu	Ala	Thr	Manon-Jensen et al., 2013
EPVALTES	PVAL	36	34.3			Coatomer subunit gamma-2	Q9QXK3	1-871	peptide-Gln635+Leu-peptide	N	MS	Glu	Pro	Val	Gln	Leu	Thr	Glu	Ala	auf dem Keller et al., 2010
EPVQLTEA	PVQL	762	26.09			triosephosphate isomerase	P17751	2-299	peptide-Trp169+Ala-peptide	N	MS	Glu	Pro	Val	Trp	Ala	Ile	Gly	Thr	Kleifeld et al., 2010
EPVWAIGT	PVWA	37173	0.21			myelin basic protein isoform 1	P04370	1-246	peptide-Glu116+Leu-peptide	P	MS	Glu	Ser	Asp	Glu	Leu	Gln	Thr	Ile	Shiryaev et al., 2009	25544
ESCGIHET	SCGI	72442	0.05			complement C1q subcomponent subunit B	P02746	26-251	peptide-Asp115+Tyr-peptide	N		Glu	Ser	Gly	Asp	Tyr	Lys	Ala	Thr	Ruiz et al., 1999	19778
ESDELQTI	SDEL	132868	0			Actin, cytoplasmic 1	P60710	2-375	peptide-Gly273+Ile-peptide	N	MS	Glu	Ser	Cys	Gly	Ile	His	Glu	Thr	auf dem Keller et al., 2010
ESFKKQSF	SFKK	41215	0.17			Phosphoglycerate mutase 1	Q9DBJ1	2-254	peptide-Ala105+Lys-peptide	N	MS	Glu	Thr	Ala	Ala	Lys	His	Gly	Glu	auf dem Keller et al., 2010
ESGDYKAT	SGDY	77809	0.04			Dentin matrix acidic phosphoprotein 1	P98193	17-489	peptide-Ser382+Leu-peptide	P	AB	Glu	Ser	Leu	Ser	Leu	Ser	Glu	Glu	Chaussain et al., 2009
ESKSISAP	SKSI	104481	0			Rho GDP-dissociation inhibitor 1	Q99PT1	2-204	peptide-Lys98+Lys-peptide	N	MS	Glu	Ser	Phe	Lys	Lys	Gln	Ser	Phe	auf dem Keller et al., 2010
ESLSLSEE	SLSL	56026	0.09			Sorting nexin-2	Q9CWK8	1-519	peptide-Ser117+Ile-peptide	N	MS	Glu	Ser	Lys	Ser	Ile	Ser	Ala	Pro	auf dem Keller et al., 2010
ETAAKHGE	TAAK	75233	0.04			Heat shock protein HSP 90-alpha	P07901	2-733	peptide-Leu672+Leu-peptide	N	MS	Glu	Thr	Ala	Leu	Leu	Ser	Ser	Gly	auf dem Keller et al., 2010
ETALLSSG	TALL	11868	1.89			cDNA FLJ78501, highly similar to Homo sapiens serpin peptidase inhibitor, clade H	A8K259	167-190	peptide-Ala178+Gln-peptide	N	MS	Glu	Trp	Ala	Ala	Gln	Thr	Thr	Asp	Schilling & Overall, 2008
EVAQQKSL	VAQQ	6001	7.69			UDP-glucose:glycoprotein glucosyltransferase 1	Q9NYU2	597-614	YPYVEVNS+ILGIDSAYDR	N	MS	Glu	Val	Asn	Ser	Ile	Leu	Gly	Ile	Schilling & Overall, 2008
EVCHITCK	VCHI	15765	1.08			Eukaryotic initiation factor 4A-I	P60843	1-406	peptide-Lys146+Leu-peptide	N	MS	Glu	Val	Gln	Lys	Leu	Gln	Met	Glu	auf dem Keller et al., 2010
EVDALKGT	VDAL	12828	1.62			eukaryotic translation initiation factor 2 subunit 3	P41091	260-285	peptide-Asp273+Leu-peptide	N	MS	Glu	Val	Asp	Asp	Leu	Lys	Gly	Gly	Schilling & Overall, 2008
EVDDLKGG	VDDL	57805	0.08			Peptidyl-prolyl cis-trans isomerase FKBP4	Q02790	98-121	peptide-His104+Ile-peptide	N	MS	Glu	Val	Cys	His	Ile	Thr	Cys	Lys	Schilling & Overall, 2008
EVEAIINP	VEAI	11321	2.09			vimentin	P20152	2-466	peptide-Arg175+Asp-peptide	N	MS	Glu	Val	Glu	Arg	Asp	Asn	Leu	Ala	Kleifeld et al., 2010
EVENLILE	VENL	3440	13.94			proliferation-associated protein 2G4	P50580	2-394	peptide-Glu222+Val-peptide	N	MS	Glu	Val	His	Glu	Val	Tyr	Ala	Val	auf dem Keller et al., 2010
EVERDNLA	VERD	126849	0			SPAG9 protein	A6H8U5	408-424	EVEN+LILENTQLLETK	N	MS	Glu	Val	Glu	Asn	Leu	Ile	Leu	Glu	Schilling & Overall, 2008
EVHEVYAV	VHEV	146880	0			Moesin	P26041	2-577	peptide-Lys143+Ser-peptide	N	MS	Glu	Val	His	Lys	Ser	Gly	Tyr	Leu	auf dem Keller et al., 2010
EVHKSGYL	VHKS	56779	0.09			Eukaryotic peptide chain release factor GTP-binding subunit ERF3A	Q8R050	1-636	peptide-Gly482+Ile-peptide	N	MS	Glu	Val	Leu	Gly	Ile	Leu	Ser	Asp	Prudova et al., 2010
EVKNKIAS	VKNK	127690	0			dynein light chain Tctex-type 1	P63172	1934-12-01	peptide-Asn19+Ile-peptide	N	MS	Glu	Val	Ser	Asn	Ile	Val	Lys	Glu	Schilling & Overall, 2008
EVKRILGL	VKRI	129427	0			Calponin-3	Q9DAW9	1-330	peptide-Asn18+Lys-peptide	N	MS	Glu	Val	Lys	Asn	Lys	Ile	Ala	Ser	auf dem Keller et al., 2010
EVLGILSD	VLGI	1664	20.59			Elongation factor 1-gamma	Q9D8N0	2-437	peptide-Arg137+Ile-peptide	N	MS	Glu	Val	Lys	Arg	Ile	Leu	Gly	Leu	auf dem Keller et al., 2010
EVNSILGI	VNSI	8188	4.18			Vimentin	P20152	2-466	peptide-Ala332+Leu-peptide	N	MS	Glu	Val	Asp	Ala	Leu	Lys	Gly	Thr	auf dem Keller et al., 2010
EVQKLQME	VQKL	3631	13.41			H2A histone family, member Y isoform 2 variant	Q59FH0	1955-01-01	peptide-Ala34+Ile-peptide	N	MS	Glu	Val	Glu	Ala	Ile	Ile	Asn	Pro	Schilling & Overall, 2008
EVSGIKAA	VSGI	1040	24.28			Survival of motor neuron-related-splicing factor 30	Q8BGT7	1-238	peptide-Pro118+Leu-peptide	N	MS	Glu	Val	Thr	Pro	Leu	Leu	Asn	Leu	auf dem Keller et al., 2010
EVSNIVKE	VSNI	558	27.98			Lamin-A/C	P48678-2	1-462	peptide-Gly76+Ile-peptide	N	MS	Glu	Val	Ser	Gly	Ile	Lys	Ala	Ala	Prudova et al., 2010
EVTPLLNL	VTPL	6717	6.22			dihydropteridine reductase	P09417	167-191	peptide-Ala177+Ile-peptide	N	MS	Gly	Ala	Ala	Ala	Ile	Ala	Val	Leu	Schilling & Overall, 2008
EWAALVQA	WAAL	1015	24.45			Cytosolic non-specific dipeptidase	Q9D1A2	1-475	peptide-Ala27+Ile-peptide	N	MS	Glu	Trp	Val	Ala	Ile	Gln	Ser	Val	auf dem Keller et al., 2010
EWAAQTTD	WAAQ	4085	12.2			rheumatoid arthritis related antigen RA-A47	Q9NPA9	61-84	peptide-Ala72+Gln-peptide	N	MS	Glu	Trp	Ala	Ala	Gln	Thr	Thr	Asp	Schilling & Overall, 2008
EWVAIQSV	WVAI	35786	0.23			Heterogeneous nuclear ribonucleoprotein F	Q9Z2X1	2-415	peptide-Gly248+Leu-peptide	N	MS	Glu	Tyr	Ser	Gly	Leu	Ser	Asp	Gly	Prudova et al., 2010
EYSGLSDG	YSGL	3102	14.98			plectin	Q9QXS1	4691-01-01	peptide-Gln1798+Gln-peptide	N	MS	Glu	Val	Ala	Gln	Gln	Lys	Ser	Leu	Kleifeld et al., 2010
FAAHLIAG	AAHL	807	25.78			phenylalanyl-tRNA synthetase beta chain	Q9NSD9	550-573	peptide-Gly555+Gln-peptide	N	MS	Phe	Ala	Arg	Gly	Gln	Ser	Val	Gly	Schilling & Overall, 2008
FACPIVDS	ACPI	26301	0.41			T-complex protein 1 subunit theta	P42932	2-548	peptide-Met14+Leu-peptide	N	MS	Phe	Ala	Gln	Met	Leu	Lys	Asp	Gly	Prudova et al., 2010
FALGIFAI	ALGI	2192	18.22			Phosphoglycerate kinase 1	P09411	2-417	peptide-Ser153+Leu-peptide	N	MS	Phe	Arg	Ala	Ser	Leu	Ser	Lys	Leu	auf dem Keller et al., 2010
FAQMLKDG	AQML	5533	8.61			ras GTPase-activating-like protein IQGAP1	P46940	622-641	FALG+IFAINEAVESGDVGK	N	MS	Phe	Ala	Leu	Gly	Ile	Phe	Ala	Ile	Schilling & Overall, 2008
FARGQSVG	ARGQ	6515	6.58			Phosphoglycerate kinase 1	P09411	2-417	peptide-Gly351+Thr-peptide	N	MS	Phe	Ala	Arg	Gly	Thr	Lys	Ser	Leu	auf dem Keller et al., 2010
FARGTKSL	ARGT	111684	0			bifunctional aminoacyl-tRNA synthetase	P07814	370-395	peptide-Pro382+Ile-peptide	N	MS	Phe	Ala	Cys	Pro	Ile	Val	Asp	Ser	Schilling & Overall, 2008
FEAAMLGQ	EAAM	20962	0.63			Heat shock protein HSP 90-beta	P11499	2-724	peptide-Ala662+Leu-peptide	N	MS	Phe	Glu	Thr	Ala	Leu	Leu	Ser	Ser	Prudova et al., 2010
-FEELCSD	FEEL	137346	0			heat shock 70 kDa protein 6	P17066	303-313	FEE+LCSDLFR	N	MS	-	Phe	Glu	Glu	Leu	Cys	Ser	Asp	Schilling & Overall, 2008
FETALLSS	ETAL	110890	0			Nucleophosmin	Q61937	1-292	peptide-Glu22+Leu-peptide	N	MS	Phe	Gly	Cys	Glu	Leu	Lys	Ala	Asp	Prudova et al., 2010
FFAKMLDH	FAKM	10159	2.61			DNA topoisomerase 1	P11387	255-267	VAT+FFAKMLDHE	N	MS	-	Val	Ala	Thr	Phe	Phe	Ala	Lys	Schilling & Overall, 2008
FFKNIVTP	FKNI	45989	0.14			valine--tRNA ligase	P26640	303-334	peptide-Pro321+Glu-peptide	N	MS	Phe	Phe	Lys	Pro	Glu	Tyr	Gly	Arg	Schilling & Overall, 2008
FFKPEYGR	FKPE	50628	0.11			probable ATP-dependent RNA helicase DDX5	P17844	97-114	EANFPAN+VMDVIARQNF	N	MS	Phe	Pro	Ala	Asn	Val	Met	Asp	Val	Schilling & Overall, 2008
FGCELKAD	GCEL	123271	0			elongation factor 2	P13639	206-230	peptide-Gly217+Leu-peptide	N	MS	Phe	Gly	Ser	Gly	Leu	His	Gly	Trp	Schilling & Overall, 2008
FGSGLHGW	GSGL	11643	1.97			insulin-like growth factor binding protein 3	P17936	28-291	peptide-Leu168+His-peptide	P		Phe	His	Pro	Leu	His	Ser	Lys	Ile	Fowlkes et al., 1994
FHPLHSKI	HPLH	32962	0.27			Enolase	Q922A0	1-338	peptide-Asp287+Leu-peptide	N	MS	Phe	Ile	Ala	Asp	Leu	Val	Val	Gly	Prudova et al., 2010
FIADLVVG	IADL	800	25.82			Alpha-enolase	P17182	2-434	peptide-Asp383+Leu-peptide	N	MS	Phe	Ile	Ala	Asp	Leu	Val	Val	Gly	auf dem Keller et al., 2010
FIALVHVD	IALV	94812	0			Heat shock protein HSP 90-alpha	P07901	2-733	peptide-Gly388+Val-peptide	N	MS	Phe	Ile	Arg	Gly	Val	Val	Asp	Ser	auf dem Keller et al., 2010
FIGGLAAQ	IGGL	714	26.48			Heterogeneous nuclear ribonucleoprotein G	O35479	1-388	peptide-Gly14+Leu-peptide	N	MS	Phe	Ile	Gly	Gly	Leu	Asn	Thr	Glu	auf dem Keller et al., 2010
FIGGLNTE	IGGL	714	26.48			heterogeneous nuclear ribonucleoprotein A1-like protein	Q32P51	15-31	LFIGG+LSFETTDESLR	N	MS	Phe	Ile	Gly	Gly	Leu	Ser	Phe	Glu	Schilling & Overall, 2008
FIGGLSFE	IGGL	714	26.48			FBRNP	Q65ZQ3	36-52	LFIGG+LSFETTDDSLR	N	MS	Phe	Ile	Gly	Gly	Leu	Ser	Phe	Glu	Schilling & Overall, 2008
FIGGLSWD	IGGL	714	26.48			Heterogeneous nuclear ribonucleoprotein D-like	Q9Z130	1-301	peptide-Gly35+Leu-peptide	N	MS	Phe	Ile	Gly	Gly	Leu	Ser	Trp	Asp	Prudova et al., 2010
FIGNLNTL	IGNL	39	34.24			cDNA, FLJ92657, highly similar to Homo sapiens heterogeneous nuclear ribonucleoprotein C	B2R5W2	17-30	VFIGN+LNTLVVKK	N	MS	Phe	Ile	Gly	Asn	Leu	Asn	Thr	Leu	Schilling & Overall, 2008
FIGNSTAI	IGNS	10538	2.41			Tubulin beta-2C chain	P68372	1-445	peptide-Asn370+Ser-peptide	N	MS	Phe	Ile	Gly	Asn	Ser	Thr	Ala	Ile	auf dem Keller et al., 2010
FIQSIVST	IQSI	2895	15.56			heterogeneous nuclear ribonucleoprotein C-like 1	O60812	17-30	VFIGN+LNTLVVKK	N	MS	Phe	Ile	Gly	Asn	Leu	Asn	Thr	Leu	Schilling & Overall, 2008
FIRGVVDS	IRGV	7091	5.59			heat shock protein 75 kDa, mitochondrial	Q9CQN1	61-706	peptide-Gly391+Val-peptide	N	MS	Phe	Ile	Arg	Gly	Val	Val	Asp	Ser	Kleifeld et al., 2010
FISSLKSA	ISSL	375	29.71			DNA polymerase epsilon subunit 3	Q9JKP7	2-145	peptide-Pro84+Leu-peptide	N	MS	Phe	Ile	Thr	Pro	Leu	Lys	Glu	Ala	Prudova et al., 2010
FITPLKEA	ITPL	12274	1.77			poly [ADP-ribose] polymerase 1	P09874	467-486	SLQELFLAH+ILSPWGAEVK	N	MS	Phe	Leu	Ala	His	Ile	Leu	Ser	Pro	Schilling & Overall, 2008
FKFRAKFY	KFRA	51049	0.11			Decorin precursor	P07585	17-359	peptide-Glu30+Asp-peptide	P	NT	Phe	Met	Leu	Glu	Asp	Glu	Ala	Ser	Imai et al., 1997
FLAHILSP	LAHI	787	25.94			Protein arginine N-methyltransferase 5	Q8CIG8	2-637	peptide-pro474+Ile-peptide	N	MS	Phe	Leu	Ala	Pro	Ile	Ser	Ser	Ser	auf dem Keller et al., 2010
FLAPISSS	LAPI	1308	22.49			Heat shock protein HSP 90-alpha	P07901	2-733	peptide-Glu47+Leu-peptide	N	MS	Phe	Leu	Arg	Glu	Leu	Ile	Ser	Asn	Prudova et al., 2010
FLGDSWGI	LGDS	60539	0.08			Peroxiredoxin-6	O08709	2-224	peptide-Asp31+Ser-peptide	N	MS	Phe	Leu	Gly	Asp	Ser	Trp	Gly	Ile	auf dem Keller et al., 2010
FLGNKYES	LGNK	90601	0			peroxiredoxin-6	P30041	24-41	FHDFLGD+SWGILFSHPR	N	MS	Phe	Leu	Gly	Asp	Ser	Trp	Gly	Ile	Schilling & Overall, 2008
FLLELIGG	LLEL	22476	0.55			ubiquitin-like modifier-activating enzyme 1	P22314	134-174	peptide-Gly158+Phe-peptide	N	MS	Phe	Leu	Ser	Gly	Phe	Gln	Val	Val	Schilling & Overall, 2008
FLNGLTGK	LNGL	4462	11.19			72 kDa type IV collagenase	P08253	110-660	peptide-Asn358+Lys-peptide	P	MS	Phe	Leu	Gly	Asn	Lys	Tyr	Glu	Ser	auf dem Keller et al., 2010
FLRELISN	LREL	1468	21.53			Endoplasmin	P08113	22-802	peptide-Glu103+Leu-peptide	N	MS	Phe	Leu	Arg	Glu	Leu	Ile	Ser	Asn	auf dem Keller et al., 2010
FLSGFQVV	LSGF	1879	19.58			Obg-like ATPase 1	Q9CZ30	1-396	peptide-His113+Ile-peptide	N	MS	Phe	Leu	Ser	His	Ile	Ser	Ala	Cys	Prudova et al., 2010
FLSHISAC	LSHI	1382	22.05			Moesin	P26041	2-577	peptide-Arg81+Ala-peptide	N	MS	Phe	Lys	Phe	Arg	Ala	Lys	Phe	Tyr	auf dem Keller et al., 2010
FMLEDEAS	MLED	127983	0			DNA topoisomerase 1	Q04750	2-767	peptide-Lys264+Met-peptide	N	MS	Phe	Phe	Ala	Lys	Met	Leu	Asp	His	auf dem Keller et al., 2010
FNGALAAV	NGAL	5616	8.44			Phosphoglycerate kinase 2	P09041	2-417	peptide-Ser153+Leu-peptide	N	MS	Phe	Gln	Ala	Ser	Leu	Ser	Lys	Leu	auf dem Keller et al., 2010
FPANVMDV	PANV	348	30.02			Macrophage-capping protein	P24452	1-352	peptide-Ser15+Val-peptide	N	MS	Phe	Pro	Ala	Ser	Val	Gln	Asp	Pro	auf dem Keller et al., 2010
FPASVQDP	PASV	645	27.11			Elongation factor 2	P58252	2-858	peptide-Gly612+Leu-peptide	N	MS	Phe	Pro	Asp	Gly	Leu	Ala	Glu	Asp	auf dem Keller et al., 2010
FPCTLVAQ	PCTL	15305	1.15			ITPase	Q5NT82	2020-07-22	KFPCT+LVAQKIDLPE	N	MS	Phe	Pro	Cys	Thr	Leu	Val	Ala	Gln	Schilling & Overall, 2008
FPDGLAED	PDGL	6714	6.23			Inosine triphosphate pyrophosphatase isoform 2	Q9BY32-2	2020-12-27	KFPCT+LVAQKIDLPE	N	MS	Phe	Pro	Cys	Thr	Leu	Val	Ala	Gln	Schilling & Overall, 2008
FPEGLFYE	PEGL	393	29.5			LIM and senescent cell antigen-like-containing domain protein 1	Q99JW4	2-325	peptide-Gly48+Leu-peptide	N	MS	Phe	Pro	Glu	Gly	Leu	Phe	Tyr	Glu	auf dem Keller et al., 2010
FPEPLREE	PEPL	680	26.82			Protein S100-A10	P08207	1997-02-01	peptide-Phe42+Leu-peptide	N	MS	Phe	Pro	Gly	Phe	Leu	Glu	Asn	Gln	auf dem Keller et al., 2010
FPGFLENQ	PGFL	729	26.34			tubulin alpha-4A chain	P68366	264-280	IHFPLA+TYAPVISAEK	N	MS	Phe	Pro	Leu	Ala	Thr	Tyr	Ala	Pro	Schilling & Overall, 2008
FPLATYAP	PLAT	7770	4.7			tubulin alpha-1C chain	Q9BQE3	264-280	IHFPLA+TYAPVISAEK	N	MS	Phe	Pro	Leu	Ala	Thr	Tyr	Ala	Pro	Schilling & Overall, 2008
FPQGQLSI	PQGQ	2169	18.32			fructose-bisphosphate aldolase A	P04075	90-122	peptide-Val97+Ile-peptide	N	MS	Phe	Pro	Gln	Val	Ile	Lys	Ser	Lys	Schilling & Overall, 2008
FPQVIKSK	PQVI	10977	2.21			LIM and senescent cell antigen-like-containing domain protein 2	Q91XD2	1-341	peptide-Gly53+Leu-peptide	N	MS	Phe	Pro	Glu	Gly	Leu	Phe	Tyr	Glu	auf dem Keller et al., 2010
FPSGSSSP	PSGS	10750	2.33			ubiquitinyl hydrolase-L1	P09936	178-195	MPFPVN+HGASSEDTLLK	N	MS	Phe	Pro	Val	Asn	His	Gly	Ala	Ser	Schilling & Overall, 2008
FPVDLTGL	PVDL	833	25.5			Peptidyl-prolyl cis-trans isomerase FKBP4	P30416	2-458	peptide-Ala338+Ile-peptide	N	MS	Phe	Ser	Ala	Ala	Ile	Glu	Ser	Cys	auf dem Keller et al., 2010
FPVNHGAS	PVNH	4625	10.79			alanyl-tRNA synthetase, cytoplasmic	P49588	404-432	peptide-Asp423+Leu-peptide	N	MS	Phe	Pro	Val	Asp	Leu	Thr	Gly	Leu	Schilling & Overall, 2008
FQASLSKL	QASL	1667	20.58			Actin, cytoplasmic 1	P60710	1-375	peptide-Met355+Trp-peptide	N	MS	Phe	Gln	Gln	Met	Trp	Ile	Ser	Lys	auf dem Keller et al., 2010
FQKAFQVW	QKAF	95850	0			cDNA FLJ75116, highly similar to Homo sapiens annexin A6, transcript variant 1, mRNA	A8K3Q7	149-168	TSGHFQKM+LVVLLQGTREE	N	MS	Phe	Gln	Lys	Met	Leu	Val	Val	Leu	Schilling & Overall, 2008
FQKMLVVL	QKML	96756	0			Annexin	A6NN80	1-667	TSGHFQKM+LVVLLQGTREE	N	MS	Phe	Gln	Lys	Met	Leu	Val	Val	Leu	Schilling & Overall, 2008
FQKPYVSG	QKPY	23800	0.49			T-complex protein 1 subunit alpha	P17987	321-355	peptide-Ala343+Met-peptide	N	MS	Phe	Glu	Ala	Ala	Met	Leu	Gly	Gln	Schilling & Overall, 2008
FQQMWISK	QQMW	104220	0			Macrophage metalloelastase	P34960	110-473	peptide-Ala141+Phe-peptide	N	MS	Phe	Gln	Lys	Ala	Phe	Gln	Val	Trp	auf dem Keller et al., 2010
FRASLSKL	RASL	5296	9.12			annexin A1	P04083	175-190	FRNA+LLSLAKGDRSE	N	MS	Phe	Arg	Asn	Ala	Leu	Leu	Ser	Leu	Schilling & Overall, 2008
FRNALLSL	RNAL	30226	0.32			acetyl-CoA acetyltransferase, cytosolic	Q9BWD1	15-39	peptide-Ala24+Leu-peptide	N	MS	Phe	Asn	Gly	Ala	Leu	Ala	Ala	Val	Schilling & Overall, 2008
FSAAIESC	SAAI	4058	12.29			chloride intracellular channel protein 1	O00299	109-130	peptide-Tyr117+Ile-peptide	N	MS	Phe	Ser	Ala	Tyr	Ile	Lys	Asn	Ser	Schilling & Overall, 2008
FSAYIKNS	SAYI	9659	2.95			probable rRNA-processing protein EBP2	Q99848	25-41	AFSRG+LLKPGLNVVLE	N	MS	Phe	Ser	Arg	Gly	Leu	Leu	Lys	Pro	Schilling & Overall, 2008
FSMEMNAF	SMEM	109500	0			Nidogen-1	P10493	29-1245	peptide-Gln1120+Leu-peptide	N	MS	Phe	Ser	Ser	Gln	Leu	Cys	Trp	Val	auf dem Keller et al., 2010
FSQYIKNS	SQYI	11249	2.11			cathepsin L1 precursor	P06797	18-334	peptide-Glu76+Met-peptide	N	MS	Phe	Ser	Met	Glu	Met	Asn	Ala	Phe	Kleifeld et al., 2010
FSRGLLKP	SRGL	6749	6.16			60S ribosomal protein L5	P46777	217-238	peptide-Tyr226+Ile-peptide	N	MS	Phe	Ser	Gln	Tyr	Ile	Lys	Asn	Ser	Schilling & Overall, 2008
FSSGLKGM	SSGL	5252	9.22			Eotaxin	P48298	24-97	peptide-Gln20+Val-peptide	P	NT	Phe	Thr	Ser	Gln	Val	Leu	Ala	His	Greenlee et al., 2006
FSSQLCWV	SSQL	14458	1.28			ATP synthase subunit alpha, mitochondrial	P25705	97-127	peptide-Gly101+Leu-peptide	N	MS	Phe	Ser	Ser	Gly	Leu	Lys	Gly	Met	Schilling & Overall, 2008
FTSQVLAH	TSQV	78326	0.04			fatty acid synthase	P49327	1939-12-01	peptide-Asn25+Leu-peptide	N	MS	Phe	Trp	Asp	Asn	Leu	Ile	Gly	Gly	Schilling & Overall, 2008
FVANLFNK	VANL	17	34.97			Ras GTPase-activating protein-binding protein 1	P97855	2-465	peptide-Gln18+Tyr-peptide	N	MS	Phe	Val	Arg	Gln	Tyr	Tyr	Thr	Leu	auf dem Keller et al., 2010
FVDCLIEQ	VDCL	39280	0.19			complement component 1 Q subcomponent-binding protein, mitochondrial precursor	Q07021	80-94	AFVDF+LSDEIKEER	N	MS	Phe	Val	Asp	Phe	Leu	Ser	Asp	Glu	Schilling & Overall, 2008
FVDFLSDE	VDFL	12403	1.73			Ras-related protein Rap-1A	P62835	1-181	peptide-Gly26+Ile-peptide	N	MS	Phe	Val	Gln	Gly	Ile	Phe	Val	Glu	auf dem Keller et al., 2010
FVEWQMGE	VEWQ	95885	0			diphosphomevalonate decarboxylase	P53602	161-184	peptide-Trp170+Gln-peptide	N	MS	Phe	Val	Glu	Trp	Gln	Met	Gly	Glu	Schilling & Overall, 2008
FVGGIKED	VGGI	2518	16.93			heterogeneous nuclear ribonucleoprotein A3	A2AL12	1-318	peptide-Gly132+Ile-peptide	N	MS	Phe	Val	Gly	Gly	Ile	Lys	Glu	Asp	Kleifeld et al., 2010
FVGGLNFN	VGGL	718	26.45			cold-inducible RNA-binding protein	Q14011	2020-07-28	peptide-Gly12+Leu-peptide	N	MS	Phe	Val	Gly	Gly	Leu	Ser	Phe	Asp	Schilling & Overall, 2008
FVGGLSFD	VGGL	718	26.45			cDNA FLJ46566 fis, clone THYMU3040829, moderately similar to Cold- inducible RNA-binding protein	Q6ZR81	2020-07-28	peptide-Gly12+Leu-peptide	N	MS	Phe	Val	Gly	Gly	Leu	Ser	Phe	Asp	Schilling & Overall, 2008
FVGGLSWD	VGGL	718	26.45			Semaphorin-3E	P70275	26-775	peptide-Ser230+Tyr-peptide	N	MS	Phe	Val	Gly	Ser	Tyr	Met	Ile	Pro	auf dem Keller et al., 2010
FVGRSNAQ	VGRS	25786	0.43			Heterogeneous nuclear ribonucleoproteins A2/B1	O88569	1-353	peptide-Gly118+Ile-peptide	N	MS	Phe	Val	Gly	Gly	Ile	Lys	Glu	Asp	auf dem Keller et al., 2010
FVGSYMIP	VGSY	1904	19.47			Tubulin alpha-1C chain	P68373	1-449	peptide-Trp407+Tyr-peptide	N	MS	Phe	Val	His	Trp	Tyr	Val	Gly	Glu	auf dem Keller et al., 2010
FVHWYVGE	VHWY	3683	13.27			tubulin alpha-1A chain	P68369	1-451	peptide-Trp407+Tyr-peptide	N	MS	Phe	Val	His	Trp	Tyr	Val	Gly	Glu	Kleifeld et al., 2010
FVKGLSED	VKGL	1372	22.11			hsc70-interacting protein	P50502	2020-08-27	LRAFVKM+CKQDPSVLHTEE	N	MS	Phe	Val	Lys	Met	Cys	Lys	Gln	Asp	Schilling & Overall, 2008
FVKMCKQD	VKMC	146560	0			protein FAM10A5	Q8NFI4	2020-08-27	LRAFVKM+CKQDPSVLHTEE	N	MS	Phe	Val	Lys	Met	Cys	Lys	Gln	Asp	Schilling & Overall, 2008
FVLNLGKD	VLNL	2030	18.91			Nucleolin	P09405	2-707	peptide-Gly575+Leu-peptide	N	MS	Phe	Val	Lys	Gly	Leu	Ser	Glu	Asp	auf dem Keller et al., 2010
FVQGIFVE	VQGI	2615	16.62			Ras-related protein Rap-1b	Q99JI6	1-181	peptide-Gly26+Ile-peptide	N	MS	Phe	Val	Gln	Gly	Ile	Phe	Val	Glu	auf dem Keller et al., 2010
FVQHFSQI	VQHF	3738	13.11			diphosphomevalonate decarboxylase variant	Q59G80	176-199	peptide-Trp185+Gln-peptide	N	MS	Phe	Val	Glu	Trp	Gln	Met	Gly	Glu	Schilling & Overall, 2008
FVRKLKED	VRKL	121406	0			116 kDa U5 small nuclear ribonucleoprotein component	Q15029	142-158	TCFVDC+LIEQTHPEIR	N	MS	Phe	Val	Asp	Cys	Leu	Ile	Glu	Gln	Schilling & Overall, 2008
FVRQYYTL	VRQY	6598	6.43			Glycyl-tRNA synthetase	Q9CZD3	1-729	peptide-Lys70+Leu-peptide	N	MS	Phe	Val	Arg	Lys	Leu	Lys	Glu	Asp	auf dem Keller et al., 2010
FVSILMAS	VSIL	19030	0.75			type VI collagen alpha 3 subunit N7 domain	O88494	1-200	peptide-Asn32+Leu-peptide	N	MS	Phe	Val	Thr	Asn	Leu	Val	Asn	Ser	Kleifeld et al., 2010
FVTNLVNS	VTNL	3772	13			plectin	Q9QXS1	4691-01-01	peptide-Glu3129+Leu-peptide	N	MS	Pro	Ala	Ala	Glu	Leu	Leu	Asp	Ser	Kleifeld et al., 2010
FWDNLIGG	WDNL	56008	0.09			Procollagen-lysine,2-oxoglutarate 5-dioxygenase 1	Q9R0E2	19-728	peptide-Gly422+Leu-peptide	N	MS	Phe	Trp	Gly	Gly	Leu	Ser	Ala	Asp	auf dem Keller et al., 2010
FWGGLSAD	WGGL	1498	21.38			Fructose-bisphosphate aldolase A	P05064	2-364	peptide-Gln61+Leu-peptide	N	MS	Phe	Tyr	Arg	Gln	Leu	Leu	Leu	Thr	auf dem Keller et al., 2010
-FYALSAS	FYAL	50153	0.12			peroxiredoxin-6	P30041	2020-01-22	peptide-Gly4+Leu-peptide	N	MS	-	Pro	Gly	Gly	Leu	Leu	Leu	Gly	Schilling & Overall, 2008
FYGDLEKD	YGDL	9598	3			phosphoglycerate mutase 1	P18669	129-154	peptide-Asn135+Ile-peptide	N	MS	Phe	Tyr	Ser	Asn	Ile	Ser	Lys	Asp	Schilling & Overall, 2008
FYRQLLLT	YRQL	90754	0			Calreticulin	P14211	18-416	peptide-Asp59+Leu-peptide	N	MS	Phe	Tyr	Gly	Asp	Leu	Glu	Lys	Asp	auf dem Keller et al., 2010
FYSNISKD	YSNI	3195	14.68			plastin-3	P13797	364-381	peptide-Asn369+Leu-peptide	N	MS	Phe	Val	Ala	Asn	Leu	Phe	Asn	Lys	Schilling & Overall, 2008
GAAAIAVL	AAAI	834	25.49			Protein RCC2	Q8BK67	1-520	peptide-Ala81+Ile-peptide	N	MS	Gly	Ala	Ala	Ala	Ile	Ile	Thr	Glu	Prudova et al., 2010
GAAAIITE	AAAI	834	25.49			scaffold attachment factor B1	Q15424	2020-01-30	peptide-Ala18+Leu-peptide	N	MS	Gly	Ala	Ala	Ala	Leu	Ser	Ser	Ala	Schilling & Overall, 2008
GAAALSSA	AAAL	238	31.4			Lysyl oxidase homolog 1	P97873	95-607	peptide-Ala219+Val-peptide	N	MS	Gly	Ala	Ala	Ala	Val	Ala	Ser	Ala	Prudova et al., 2010
GAAAVASA	AAAV	9078	3.37			Collagen alpha-1(III) chain	P08121	155-1219	peptide-Gly1124+His-peptide	N	MS	Gly	Ala	Ala	Gly	His	Gln	Gly	Ala	Prudova et al., 2010
GAAGHQGA	AAGH	75760	0.04			collagen alpha-1(II) chain	P02458	182-1241	peptide-Gly1053+Val-peptide	P	MS	Gly	Ala	Ala	Gly	Val	Lys	Gly	Asp	Zhen et al., 2008	22922
GAAGVKGD	AAGV	18949	0.76			cDNA, FLJ92028, Homo sapiens ribosomal protein L27a	B2R4B3	81-108	peptide-Pro99+Ile-peptide	N	MS	Gly	Ala	Ala	Pro	Ile	Ile	Asp	Val	Schilling & Overall, 2008
GAAPIIDV	AAPI	1851	19.68			ribosomal protein L27a	Q6NZ52	81-108	peptide-Pro99+Ile-peptide	N	MS	Gly	Ala	Ala	Pro	Ile	Ile	Asp	Val	Schilling & Overall, 2008
GAGSYIYE	AGSY	8797	3.6			inorganic pyrophosphatase	Q15181	88-109	peptide-Pro98+Gln-peptide	N	MS	Gly	Ala	Ile	Pro	Gln	Thr	Trp	Glu	Schilling & Overall, 2008
GAIPQTWE	AIPQ	14377	1.3			cDNA, FLJ93329, Homo sapiens importin 7	B2R786	429-445	DGALH+MIGSLAEILLK	N	MS	Gly	Ala	Leu	His	Met	Ile	Gly	Ser	Schilling & Overall, 2008
GAKGLTGS	AKGL	1462	21.56			collagen alpha-1(II) chain	P02458	182-1241	peptide-Gly420+Ser-peptide	P	MS	Gly	Ala	Lys	Gly	Ser	Ala	Gly	Ala	Zhen et al., 2008	22930
GAKGSAGA	AKGS	76793	0.04			T-complex protein 1 subunit theta	P42932	2-548	peptide-His21+Phe-peptide	N	MS	Gly	Ala	Lys	His	Phe	Ser	Gly	Leu	auf dem Keller et al., 2010
GAKHFSGL	AKHF	11854	1.89			Src substrate cortactin	Q60598	1-546	peptide-Thr43+Val-peptide	N	MS	Gly	Ala	Lys	Thr	Val	Gln	Gly	Ser	auf dem Keller et al., 2010
GAKTVQGS	AKTV	109033	0			collagen alpha-1(II) chain	P02458	182-1241	peptide-Gly513+Asn-peptide	P	MS	Gly	Ala	Pro	Gly	Asn	Arg	Gly	Phe	Zhen et al., 2008	22950
GALHMIGS	ALHM	4254	11.77			collagen alpha-1(I) chain	P11087	152-1207	peptide-Gly528+Leu-peptide	N	MS	Gly	Ala	Lys	Gly	Leu	Thr	Gly	Ser	Kleifeld et al., 2010
--GALQNI	-GAL					C-1-tetrahydrofolate synthase, cytoplasmic	P11586	208-223	GD+ILVVATGQPEMVK	N	MS	-	-	Gly	Asp	Ile	Leu	Val	Val	Schilling & Overall, 2008
GANAILGV	ANAI	8387	3.95			gamma-enolase	P09104	105-120	FGANA+ILGVSLAVCK	N	MS	Gly	Ala	Asn	Ala	Ile	Leu	Gly	Val	Schilling & Overall, 2008
GANPVQVE	ANPV	75853	0.04			DJ-1 putative peptidase	Q99497	77-101	peptide-Asn81+Leu-peptide	N	MS	Gly	Ala	Gln	Asn	Leu	Ser	Glu	Ser	Schilling & Overall, 2008
-GANVIAG	GANV	81283	0			plectin 2	Q15149-9	3007-3023	GAN+VIAGVWLEEAGQK	N	MS	-	Gly	Ala	Asn	Val	Ile	Ala	Gly	Schilling & Overall, 2008
GAPGFPGP	APGF	20874	0.64			60S acidic ribosomal protein P2	P05387	61-94	peptide-Ala72+Val-peptide	N	MS	Gly	Ala	Val	Ala	Val	Ser	Ala	Ala	Schilling & Overall, 2008
GAPGLRGL	APGL	5899	7.85			collagen alpha-1(II) chain	P02458	182-1241	peptide-Gly432+Phe-peptide	P	MS	Gly	Ala	Pro	Gly	Phe	Pro	Gly	Pro	Zhen et al., 2008	23065
GAPGNRGF	APGN	8774	3.62			collagen alpha-1(II) chain	P02458	182-1241	peptide-Gly627+Leu-peptide	P	MS	Gly	Ala	Pro	Gly	Leu	Arg	Gly	Leu	Zhen et al., 2008	22997
GAQNLSES	AQNL	1910	19.46			Cysteine-rich protein 2	Q9DCT8	1-208	peptide-Ser74+Tyr-peptide	N	MS	Gly	Ala	Gly	Ser	Tyr	Ile	Tyr	Glu	auf dem Keller et al., 2010
GARGVSGF	ARGV	16791	0.96			valine--tRNA ligase	P26640	201-229	peptide-Pro215+Leu-peptide	N	MS	Gly	Ala	Arg	Pro	Leu	Ser	His	Gln	Schilling & Overall, 2008
GARPLSHQ	ARPL	571	27.87			Alanyl-tRNA synthetase, cytoplasmic	Q8BGQ7	1-968	peptide-Pro278+Tyr-peptide	N	MS	Gly	Ala	Arg	Pro	Tyr	Thr	Gly	Lys	Prudova et al., 2010
GARPYTGK	ARPY	1683	20.5			beta-enolase	P13929	105-120	FGANA+ILGVSLAVCK	N	MS	Gly	Ala	Asn	Ala	Ile	Leu	Gly	Val	Schilling & Overall, 2008
GAVAVSAA	AVAV	9919	2.76			Protein phosphatase 1 regulatory subunit 12A	Q9DBR7	1-1029	peptide-Phe44+Leu-peptide	N	MS	Gly	Ala	Val	Phe	Leu	Ala	Ala	Cys	auf dem Keller et al., 2010
GAVFLAAC	AVFL	8479	3.87			Cytosolic non-specific dipeptidase	Q9D1A2	1-475	peptide-Ala400+Leu-peptide	N	MS	Gly	Arg	Arg	Ala	Leu	Lys	Thr	Val	auf dem Keller et al., 2010
GCAALVTK	CAAL	6011	7.66			glutaredoxin-1	P35754	77-98	peptide-Asp85+Leu-peptide	N	MS	Gly	Cys	Ser	Asp	Leu	Val	Ser	Leu	Schilling & Overall, 2008
GCSDLVSL	CSDL	31199	0.3			proteasome beta 1 subunit variant	Q59GN1	82-99	TVIGCSG+FHGDCLTLTK	N	MS	Gly	Cys	Ser	Gly	Phe	His	Gly	Asp	Schilling & Overall, 2008
GCSGFHGD	CSGF	45225	0.14			proteasome subunit beta type-1 precursor	P20618	77-94	TVIGCSG+FHGDCLTLTK	N	MS	Gly	Cys	Ser	Gly	Phe	His	Gly	Asp	Schilling & Overall, 2008
GDAAIVDM	DAAI	68887	0.05			Insulin-like growth factor-binding protein 4	P47879	22-254	peptide-Ala24+Ile-peptide	N	MS	Gly	Asp	Glu	Ala	Ile	His	Cys	Pro	Prudova et al., 2010
GDEAIHCP	DEAI	62163	0.07			talin-1	Q9Y490	1922-1949	peptide-Ala1929+Leu-peptide	N	MS	Gly	Cys	Ala	Ala	Leu	Val	Thr	Lys	Schilling & Overall, 2008
--GDILVV	-GDI					cadherin-13 precursor	P55290	305-319	GD+IVTVVSPALLDR	N	MS	-	-	Gly	Asp	Ile	Val	Thr	Val	Schilling & Overall, 2008
--GDIVTV	-GDI					glutaredoxin-3	O76003	308-319	GE+LVGGLDIVK	N	MS	-	-	Gly	Glu	Leu	Val	Gly	Gly	Schilling & Overall, 2008
GEAHLAVN	EAHL	37526	0.21			Protein phosphatase 1 regulatory subunit 14B	Q62084	2-147	peptide-Ala11+Leu-peptide	N	MS	Gly	Gly	Ala	Ala	Leu	Ala	Ala	Pro	auf dem Keller et al., 2010
--GELVGG	-GEL					profilin-1	P07737	66-84	GG+QKCSVIRDSLLQDGEF	N	MS	-	-	Gly	Gly	Gln	Lys	Cys	Ser	Schilling & Overall, 2008
-GENLVSM	GENL	49822	0.12			poly [ADP-ribose] polymerase 1	P09874	182-197	GFS+LLATEDKEALKK	N	MS	-	Gly	Phe	Ser	Leu	Leu	Ala	Thr	Schilling & Overall, 2008
GFAGLVQE	FAGL	1967	19.17			DNA-(apurinic or apyrimidinic site) lyase	P27695	237-254	QGFGE+LLQAVPLADSFR	N	MS	Gly	Phe	Gly	Glu	Leu	Leu	Gln	Ala	Schilling & Overall, 2008
GFGELLQA	FGEL	2018	18.94			Putative RNA-binding protein 3	O89086	1-153	peptide-Phe51+Ile-peptide	N	MS	Gly	Phe	Gly	Phe	Ile	Thr	Phe	Thr	auf dem Keller et al., 2010
GFGFITFT	FGFI	16005	1.05			collagen alpha-1(II) chain	P02458	182-1241	peptide-Gly1137+Leu-peptide	P	MS	Gly	Phe	Thr	Gly	Leu	Gln	Gly	Leu	Zhen et al., 2008	23019
-GFSLLAT	GFSL	53720	0.1			serine hydroxymethyltransferase, mitochondrial precursor	P34897	368-389	peptide-Ser371+Leu-peptide	N	MS	-	Gly	Tyr	Ser	Leu	Val	Ser	Gly	Schilling & Overall, 2008
GFTGLQGL	FTGL	53054	0.1			ubiquilin-2	Q9UHD9	15-31	GPAA+AQGSAAAPAEPK	N	MS	Gly	Pro	Ala	Ala	Ala	Gln	Gly	Ser	Schilling & Overall, 2008
GGAALAAP	GAAL	2850	15.72			glutathione synthetase	P48637	367-384	EGGGNN+LYGEEMVQALK	N	MS	Gly	Gly	Asn	Asn	Leu	Tyr	Gly	Glu	Schilling & Overall, 2008
--GGIVSQ	-GGI					transgelin-2	P37802	132-144	GG+LAVARDDGLF	N	MS	-	-	Gly	Gly	Leu	Ala	Val	Ala	Schilling & Overall, 2008
--GGLAVA	-GGL					glucose-6-phosphate isomerase	P06744	162-174	GP+LMVTEALKPY	N	MS	-	-	Gly	Pro	Leu	Met	Val	Thr	Schilling & Overall, 2008
GGNNLYGE	GNNL	8939	3.48			cofilin-1	P23528	152-166	LGGSA+VISLEGKPL	N	MS	Gly	Gly	Ser	Ala	Val	Ile	Ser	Leu	Schilling & Overall, 2008
--GGQKCS	-GGQ					ubiquitin-like modifier-activating enzyme 1	P22314	288-299	GG+IVSQVKVPK	N	MS	-	-	Gly	Gly	Ile	Val	Ser	Gln	Schilling & Overall, 2008
GGSAVISL	GSAV	59722	0.08			Proliferating cell nuclear antigen	P17918	1-261	peptide-Asn36+Leu-peptide	N	MS	Gly	Gly	Val	Asn	Leu	Gln	Ser	Met	auf dem Keller et al., 2010
GGVNLQSM	GVNL	11928	1.87			alpha-2-macroglobulin	P01023	24-1474	peptide-Arg719+Leu-peptide	P		Gly	His	Ala	Arg	Leu	Val	His	Val	Arbelaez et al., 1997	3224
GHARLVHV	HARL	2341	17.65			UV excision repair protein RAD23 homolog B	P54728	1-416	peptide-Asn365+Tyr-peptide	N	MS	Gly	His	Met	Asn	Tyr	Ile	Gln	Val	Prudova et al., 2010
GHMNYIQV	HMNY	17573	0.87			Spectrin alpha chain, brain	Q13813	2472-01-01	peptide-Asn2035+Ile-peptide	N	MS	Gly	Ile	Ala	Asn	Ile	Thr	Ala	Leu	Schilling & Overall, 2008
GIANITAL	IANI	474	28.68			SPTAN1 protein	Q14917	247-277	peptide-Asn265+Ile-peptide	N	MS	Gly	Ile	Ala	Asn	Ile	Thr	Ala	Leu	Schilling & Overall, 2008
GIAQIIAA	IAQI	1865	19.63			Talin-1	P26039	2541-01-01	peptide-Gln2500+Ile-peptide	N	MS	Gly	Ile	Ala	Gln	Ile	Ile	Ala	Ala	auf dem Keller et al., 2010
GIAYIEFK	IAYI	1395	22.01			complement C1q subcomponent subunit A	P02745	23-245	peptide-Gly65+Leu-peptide	N		Gly	Ile	Gln	Gly	Leu	Lys	Gly	Asp	Ruiz et al., 1999	19775
GIFEVKST	IFEV	133113	0			phosphoglycerate kinase 1 (EC 2.7.2.3)	P00558	297-322	peptide-Ala309+Gly-peptide	N	MS	Gly	Ile	Pro	Ala	Gly	Trp	Met	Gly	Schilling & Overall, 2008
GIGGLGIT	IGGL	714	26.48			Nuclear pore complex-associated intranuclear coiled-coil protein TPR	Q7M739	2357-01-01	peptide-Gly2115+Met-peptide	N	MS	Gly	Ile	Gly	Gly	Met	Gln	Gln	His	auf dem Keller et al., 2010
GIGGMQQH	IGGM	2126	18.49			Heat shock cognate 71 kDa protein	P63017	2-646	peptide-Glu218+Val-peptide	N	MS	Gly	Ile	Phe	Glu	Val	Lys	Ser	Thr	auf dem Keller et al., 2010
GIPAGWMG	IPAG	11587	1.99			cDNA FLJ45706 fis, clone FEBRA2028457, highly similar to Nucleolin	Q6ZS99	217-235	TGISD+VFAKNDLAVVDVR	N	MS	Gly	Ile	Ser	Asp	Val	Phe	Ala	Lys	Schilling & Overall, 2008
GIQGLKGD	IQGL	1168	23.4			Filamin-B	Q80X90	2602-01-01	peptide-Gly1360+Leu-peptide	N	MS	Gly	Ile	Gly	Gly	Leu	Gly	Ile	Thr	auf dem Keller et al., 2010
GISDVFAK	ISDV	82441	0			L-lactate dehydrogenase A chain	P06151	2-332	peptide-Asp302+Val-peptide	N	MS	Gly	Ile	Ser	Asp	Val	Val	Lys	Val	auf dem Keller et al., 2010
GISDVVKV	ISDV	82441	0			annexin A1	P04083	317-337	MYGISL+CQAILDETKGDYEK	N	MS	Gly	Ile	Ser	Leu	Cys	Gln	Ala	Ile	Schilling & Overall, 2008
GISLCQAI	ISLC	72901	0.05			tubulin-specific chaperone E	Q15813	278-302	peptide-Ser291+Leu-peptide	N	MS	Gly	Ile	Ser	Ser	Leu	His	Phe	Pro	Schilling & Overall, 2008
GISSLHFP	ISSL	375	29.71			aspartyl-tRNA synthetase, cytoplasmic	P14868	28-43	YGISS+MIQSQEKPDR	N	MS	Gly	Ile	Ser	Ser	Met	Ile	Gln	Ser	Schilling & Overall, 2008
GISSMIQS	ISSM	686	26.76			Fructose-bisphosphate aldolase A	P05064	2-364	peptide-Pro185+Ile-peptide	N	MS	Gly	Ile	Val	Pro	Ile	Val	Glu	Pro	auf dem Keller et al., 2010
GIVPIVEP	IVPI	23454	0.51			proteasome subunit beta type-3	P49720	48-66	LYIGLAG+LATDVQTVAQR	N	MS	Gly	Leu	Ala	Gly	Leu	Ala	Thr	Asp	Schilling & Overall, 2008
GKGILAAD	KGIL	40729	0.18			Heat shock 70 kDa protein 1-like	P16627	1-641	peptide-Glu29+Ile-peptide	N	MS	Gly	Lys	Val	Glu	Ile	Ile	Ala	Asn	Prudova et al., 2010
GKVEIIAN	KVEI	115859	0			Heat shock cognate 71 kDa protein	P63017	2-646	peptide-Glu27+Ile-peptide	N	MS	Gly	Lys	Val	Glu	Ile	Ile	Ala	Asn	auf dem Keller et al., 2010
GLAFIQDP	LAFI	3714	13.17			lactoylglutathione lyase	Q04760	159-179	GLAFIQDPDG+YWIEILNPNK	N	MS	Asp	Pro	Asp	Gly	Tyr	Trp	Ile	Glu	Schilling & Overall, 2008
GLAGLATD	LAGL	174	32.24			Collagen alpha-2(I) chain	Q01149	86-1108	peptide-Gly1042+Leu-peptide	N	MS	Gly	Leu	Ala	Gly	Leu	His	Gly	Asp	Prudova et al., 2010
GLAGLHGD	LAGL	174	32.24			lactoylglutathione lyase	Q04760	159-179	GLAF+IQDPDGYWIEILNPNK	N	MS	Gly	Leu	Ala	Phe	Ile	Gln	Asp	Pro	Schilling & Overall, 2008
GLESIISI	LESI	11948	1.86			cDNA FLJ25678 fis, clone TST04067, highly similar to PURINE NUCLEOSIDE PHOSPHORYLASE	Q8N7G1	24-58	peptide-Gly37+Leu-peptide	N	MS	Gly	Leu	Gly	Gly	Leu	Thr	Asp	Lys	Schilling & Overall, 2008
GLGGLTDK	LGGL	627	27.26			asparaginyl-tRNA synthetase, cytoplasmic (EC 6.1.1.22)	O43776	23-51	peptide-Ala32+Leu-peptide	N	MS	Gly	Leu	Lys	Ala	Leu	Met	Thr	Val	Schilling & Overall, 2008
GLKALMTV	LKAL	2167	18.35			Lamin-B1	P14733	2-588	peptide-Ala81+Leu-peptide	N	MS	Gly	Leu	Lys	Ala	Leu	Tyr	Glu	Thr	auf dem Keller et al., 2010
GLKALYET	LKAL	2167	18.35			PNAS-117	Q9HB66	48-63	SLGLSN+LQKSQIQGK	N	MS	Gly	Leu	Ser	Asn	Leu	Gln	Lys	Ser	Schilling & Overall, 2008
GLRGLPGK	LRGL	1712	20.33			fatty acid synthase	P49327	2482-2505	peptide-Ser2492+Ile-peptide	N	MS	Gly	Leu	Glu	Ser	Ile	Ile	Ser	Ile	Schilling & Overall, 2008
GLSHLTAE	LSHL	362	29.88			Fructose-bisphosphate aldolase A	P05064	2-364	peptide-Ile30+Leu-peptide	N	MS	Gly	Lys	Gly	Ile	Leu	Ala	Ala	Asp	auf dem Keller et al., 2010
GLSNLQKS	LSNL	148	32.5			Methylosome subunit pICln	Q61189	2-236	peptide-His175+Leu-peptide	N	MS	Gly	Leu	Ser	His	Leu	Thr	Ala	Glu	auf dem Keller et al., 2010
GMACAISI	MACA	113445	0			T-complex protein 1 subunit epsilon	P48643	352-368	LGFAG+LVQEISFGTTK	N	MS	Gly	Phe	Ala	Gly	Leu	Val	Gln	Glu	Schilling & Overall, 2008
GNAPLLAL	NAPL	2861	15.69			E3 ubiquitin-protein ligase TRIP12, Isoform 4	Q14669-4	936-951	VEPVGNAP+LLALVHK	N	MS	Gly	Asn	Ala	Pro	Leu	Leu	Ala	Leu	Schilling & Overall, 2008
GNLALAAS	NLAL	6915	5.89			Elongation factor 1-alpha 1	P10126	1-462	peptide-Ala400+Ile-peptide	N	MS	Gly	Asp	Ala	Ala	Ile	Val	Asp	Met	auf dem Keller et al., 2010
-GNSIIML	GNSI	79885	0			small nuclear ribonucleoprotein-associated protein N	P63162	73-88	GEN+LVSMTVEGPPPK	N	MS	-	Gly	Glu	Asn	Leu	Val	Ser	Met	Schilling & Overall, 2008
GPAAAQGS	PAAA	1592	20.91			Switch-associated protein 70	Q6A028	1-585	peptide-Ala565+Phe-peptide	N	MS	Gly	Pro	Ala	Ala	Phe	Thr	Gln	Ala	Prudova et al., 2010
GPAAFTQA	PAAF	107	32.93			collagen alpha-1(II) chain	P02458	182-1241	peptide-Gly651+Glu-peptide	P	MS	Gly	Pro	Ala	Gly	Glu	Arg	Gly	Glu	Zhen et al., 2008	23033
GPAGERGE	PAGE	70200	0.05			collagen alpha-2(I) chain	Q01149	86-1108	peptide-Gly436+Ile-peptide	N	MS	Gly	Pro	Ala	Gly	Ile	Arg	Gly	Pro	Kleifeld et al., 2010
GPAGIRGP	PAGI	76	33.32			60S acidic ribosomal protein P1	P05386	49-92	peptide-Pro70+Ala-peptide	N	MS	Gly	Pro	Ala	Pro	Ala	Ala	Gly	Ala	Schilling & Overall, 2008
GPAPAAGA	PAPA	5395	8.9			ATP-citrate synthase	P53396	616-635	GVTIIGPAT+VGGIKPGCFK	N	MS	Gly	Pro	Ala	Thr	Val	Gly	Gly	Ile	Schilling & Overall, 2008
GPATVGGI	PATV	6630	6.38			collagen alpha-1(II) chain	P02458	182-1241	peptide-Gly1191+Arg-peptide	P	MS	Gly	Pro	Arg	Gly	Arg	Ser	Gly	Glu	Zhen et al., 2008	22934
GPCKMIKP	PCKM	36125	0.22			collagen alpha 1(I) chain	P02453	162-1215	peptide-Gly775+Ile-peptide	P		Gly	Pro	Gln	Gly	Ile	Ala	Gly	Gln	Aimes & Quigley, 1995
GPDGLTAF	PDGL	6714	6.23			thioredoxin	P10599	26-47	peptide-Lys36+Met-peptide	N	MS	Gly	Pro	Cys	Lys	Met	Ile	Lys	Pro	Schilling & Overall, 2008
GPDGQPGT	PDGQ	112563	0			myotrophin	P58546	97-114	GPDG+LTAFEATDNQAIK	N	MS	Gly	Pro	Asp	Gly	Leu	Thr	Ala	Phe	Schilling & Overall, 2008
GPEGLRGA	PEGL	393	29.5			alpha-2-macroglobulin	P01023	24-1474	peptide-Gly702+Leu-peptide	P		Gly	Pro	Glu	Gly	Leu	Arg	Val	Gly	Arbelaez et al., 1997	3223
GPEGLRVG	PEGL	393	29.5			striatin-4	Q9NRL3	1975-04-01	peptide-Pro62+Leu-peptide	N	MS	Gly	Pro	Glu	Pro	Leu	Ser	Leu	Pro	Schilling & Overall, 2008
GPEPLSLP	PEPL	680	26.82			zinedin variant	Q59GV6	1970-01-01	peptide-Pro57+Leu-peptide	N	MS	Gly	Pro	Glu	Pro	Leu	Ser	Leu	Pro	Schilling & Overall, 2008
GPFGQIFR	PFGQ	6109	7.44			tubulin beta-2C chain	P68371	77-103	peptide-Gly82+Gln-peptide	N	MS	Gly	Pro	Phe	Gly	Gln	Ile	Phe	Arg	Schilling & Overall, 2008
GPGAASGG	PGAA	48616	0.12			serum amyloid A-2 protein	P0DJI9	19-122	peptide-Gly69+Ala-peptide	P	MS	Gly	Pro	Gly	Gly	Ala	Trp	Ala	Ala	Stix et al., 2001	3232
GPGGAWAA	PGGA	80293	0			nuclease-sensitive element-binding protein 1	P67809	26-53	peptide-Gly41+Leu-peptide	N	MS	Gly	Pro	Gly	Gly	Leu	Thr	Ser	Ala	Schilling & Overall, 2008
GPGGFGAQ	PGGF	3021	15.19			hyaluronan and proteoglycan link protein 1	P10915	16-354	peptide-Leu40+Leu-peptide	P		Gly	Pro	His	Leu	Leu	Val	Glu	Ala	Nguyen et al., 1993	3230
GPGGLTSA	PGGL	254	31.16			YB-1 protein	Q15905	26-53	peptide-Gly41+Leu-peptide	N	MS	Gly	Pro	Gly	Gly	Leu	Thr	Ser	Ala	Schilling & Overall, 2008
GPHLLVEA	PHLL	2646	16.48			eukaryotic translation initiation factor 3 subunit I	Q13347	282-298	GHFGPIN+SVAFHPDGK	N	MS	Gly	Pro	Ile	Asn	Ser	Val	Ala	Phe	Schilling & Overall, 2008
GPIGSAGP	PIGS	14797	1.23			adenosylhomocysteinase	P23526	121-142	peptide-Asn126+Met-peptide	N	MS	Gly	Pro	Leu	Asn	Met	Ile	Leu	Asp	Schilling & Overall, 2008
GPINSVAF	PINS	9793	2.85			collagen alpha-2(I) chain	Q01149	86-1108	peptide-Gly256+Ser-peptide	N	MS	Gly	Pro	Ile	Gly	Ser	Ala	Gly	Pro	Kleifeld et al., 2010
GPKASHGY	PKAS	3241	14.58			carbonyl reductase [NADPH] 1	P16152	230-254	peptide-Ala240+Thr-peptide	N	MS	Gly	Pro	Lys	Ala	Thr	Lys	Ser	Pro	Schilling & Overall, 2008
GPKATKSP	PKAT	23320	0.51			collagen alpha-1(II) chain	P02458	182-1241	peptide-Gly930+Ala-peptide	P	MS	Gly	Pro	Lys	Gly	Ala	Arg	Gly	Asp	Zhen et al., 2008	22810
GPKFLKSG	PKFL	1123	23.74			tubulin beta-4 chain	P04350	77-103	peptide-Gly82+Gln-peptide	N	MS	Gly	Pro	Phe	Gly	Gln	Ile	Phe	Arg	Schilling & Overall, 2008
GPKGARGD	PKGA	97285	0			mannose-binding protein C	P11226	21-248	peptide-Gly92+Gln-peptide	N		Gly	Pro	Lys	Gly	Gln	Lys	Gly	Asp	Butler et al., 2002	18556
GPKGELGP	PKGE	97037	0			Collagen alpha-1(III) chain	P08121	155-1219	peptide-Gly662+Glu-peptide	N	MS	Gly	Pro	Lys	Gly	Glu	Val	Gly	Ala	Prudova et al., 2010
GPKGEVGA	PKGE	97037	0			Cysteine and glycine-rich protein 2	P97314	2-193	peptide-Gly70+Tyr-peptide	N	MS	Gly	Pro	Lys	Gly	Tyr	Gly	Tyr	Gly	auf dem Keller et al., 2010
GPKGQKGD	PKGQ	1487	21.45			mannose-binding protein A	P19999	18-238	peptide-Gly80+Gln-peptide	P		Gly	Pro	Lys	Gly	Gln	Lys	Gly	Asp	Butler et al., 2002	18564
GPKGQKGE	PKGQ	1487	21.45			collagen alpha-2(I) chain	Q01149	86-1108	peptide-Gly271+Glu-peptide	N	MS	Gly	Pro	Lys	Gly	Glu	Leu	Gly	Pro	Kleifeld et al., 2010
GPKGVNIG	PKGV	1246	22.86			stress-70 protein, mitochondrial precursor	P38646	335-352	SSGPKH+LNMKLTRAQFE	N	MS	Gly	Pro	Lys	His	Leu	Asn	Met	Lys	Schilling & Overall, 2008
GPKGYGYG	PKGY	290	30.7			cysteine-rich protein 2	Q9DCT8	1-208	peptide-Gly66+Val-peptide	N	MS	Gly	Pro	Lys	Gly	Val	Asn	Ile	Gly	Kleifeld et al., 2010
GPKHLNMK	PKHL	350	30.01			Elongation factor 1-alpha 1	P10126	1-462	peptide-Phe393+Leu-peptide	N	MS	Gly	Pro	Lys	Phe	Leu	Lys	Ser	Gly	Prudova et al., 2010
GPLCLQEV	PLCL	7997	4.43			complement C1q subcomponent subunit A	P02745	23-245	peptide-Gly92+Ala-peptide	N		Gly	Pro	Leu	Gly	Ala	Arg	Gly	Ile	Ruiz et al., 1999	19776
GPLGARGI	PLGA	6108	7.44			Elongation factor 2	P58252	2-858	peptide-Met395+Met-peptide	N	MS	Gly	Pro	Leu	Met	Met	Tyr	Ile	Ser	auf dem Keller et al., 2010
GPLMMYIS	PLMM	1668	20.57			Small nuclear ribonucleoprotein Sm D2	P62317	2-118	peptide-Ser30+Val-peptide	N	MS	Gly	Pro	Leu	Ser	Val	Leu	Thr	Gln	auf dem Keller et al., 2010
--GPLMVT	-GPL					Superoxide dismutase [Cu-Zn]	P00441	110-122	HC+IIGRTLVVHE	N	MS	-	-	His	Cys	Ile	Ile	Gly	Arg	Schilling & Overall, 2008
GPLNMILD	PLNM	201	31.86			Phosphatidylethanolamine-binding protein 1	P70296	2-187	peptide-Cys13+Leu-peptide	N	MS	Gly	Pro	Leu	Cys	Leu	Gln	Glu	Val	auf dem Keller et al., 2010
GPLSVLTQ	PLSV	1542	21.12			Src substrate cortactin	Q60598	1-546	peptide-Ala80+Ser-peptide	N	MS	Gly	Pro	Lys	Ala	Ser	His	Gly	Tyr	Prudova et al., 2010
GPNGMNKM	PNGM	5483	8.7			complement C1q subcomponent subunit B	P02746	26-251	peptide-Gly51+Gln-peptide	N		Gly	Pro	Asp	Gly	Gln	Pro	Gly	Thr	Ruiz et al., 1999	19777
GPPGASGS	PPGA	99386	0			collagen alpha-1(II) chain	P02458	182-1241	peptide-Gly894+Ala-peptide	P	MS	Gly	Pro	Pro	Gly	Ala	Thr	Gly	Phe	Zhen et al., 2008	22893
GPPGATGF	PPGA	99386	0			collagen alpha-1(II) chain	P02458	182-1241	peptide-Gly939+Arg-peptide	P	MS	Gly	Pro	Pro	Gly	Arg	Ala	Gly	Glu	Zhen et al., 2008	22947
GPPGEKGE	PPGE	92350	0			Myosin-9 isoform 3	P35579-2	358-400	peptide-Gly387+Ile-peptide	N	MS	Gly	Pro	Pro	Gly	Ile	Leu	Ala	Leu	Schilling & Overall, 2008
GPPGERGA	PPGE	92350	0			collagen alpha-1(II) chain	P02458	182-1241	peptide-Gly954+Glu-peptide	P	MS	Gly	Pro	Pro	Gly	Glu	Lys	Gly	Glu	Zhen et al., 2008	22948
GPPGFASS	PPGF	3507	13.78			collagen alpha-2(I) chain	Q01149	86-1108	peptide-Gly847+Phe-peptide	N	MS	Gly	Pro	Pro	Gly	Phe	Val	Gly	Glu	Kleifeld et al., 2010
GPPGFVGE	PPGF	3507	13.78			collagen alpha-1(II) chain	P02458	182-1241	peptide-Gly909+Ser-peptide	P	MS	Gly	Pro	Pro	Gly	Ser	Asn	Gly	Asn	Zhen et al., 2008	22901
GPPGILAL	PPGI	2403	17.34			myosin-9	P35579	494-536	peptide-Gly523+Ile-peptide	N	MS	Gly	Pro	Pro	Gly	Ile	Leu	Ala	Leu	Schilling & Overall, 2008
GPPGKDGT	PPGK	45917	0.14			mannose-binding protein C	P11226	21-248	peptide-Gly74+Lys-peptide	N		Gly	Pro	Pro	Gly	Lys	Leu	Gly	Pro	Butler et al., 2002	18555
GPPGKLGP	PPGK	45917	0.14			mannose-binding protein A	P19999	18-238	peptide-Gly62+Lys-peptide	P		Gly	Pro	Pro	Gly	Lys	Leu	Gly	Pro	Butler et al., 2002	18565
GPPGKTGP	PPGK	45917	0.14			complement C1q subcomponent subunit C	P02747	29-245	peptide-Gly94+Met-peptide	N		Gly	Pro	Pro	Gly	Met	Pro	Gly	Val	Ruiz et al., 1999	19780
GPPGLAGP	PPGL	1031	24.36			collagen alpha-1(II) chain	P02458	182-1241	peptide-Gly1026+Leu-peptide	P	MS	Gly	Pro	Pro	Gly	Leu	Thr	Gly	Pro	Zhen et al., 2008	22915
GPPGLTGP	PPGL	1031	24.36			collagen alpha-1(III) chain	P02461	154-1221	peptide-Gly1149+Lys-peptide	P	MS	Gly	Pro	Pro	Gly	Lys	Asp	Gly	Thr	Zhen et al., 2008	22892
GPPGMPGV	PPGM	2350	17.6			collagen alpha-2(I) chain	Q01149	86-1108	peptide-Gly790+Met-peptide	N	MS	Gly	Pro	Pro	Gly	Met	Thr	Gly	Phe	Kleifeld et al., 2010
GPPGMTGF	PPGM	2350	17.6			RNA-binding protein 12	Q9NTZ6	751-859	peptide-Gly845+Phe-peptide	N	MS	Gly	Pro	Pro	Gly	Phe	Ala	Ser	Ser	Schilling & Overall, 2008
GPPGRAGE	PPGR	44199	0.15			collagen alpha-1(II) chain	P02458	182-1241	peptide-Gly507+Glu-peptide	P	MS	Gly	Pro	Pro	Gly	Glu	Arg	Gly	Ala	Zhen et al., 2008	23078
GPPGSNGN	PPGS	52284	0.1			mannose-binding protein A	P19999	18-238	peptide-Gly68+Ser-peptide	P		Gly	Pro	Pro	Gly	Ser	Val	Gly	Ala	Butler et al., 2002	18567
GPPGSVGA	PPGS	52284	0.1			collagen alpha-2(I) chain precursor	Q01149	23-1372	peptide-Gly1108+Val-peptide	N	MS	Gly	Pro	Pro	Gly	Val	Ser	Gly	Gly	Kleifeld et al., 2010
GPPGVSGG	PPGV	22387	0.56			Flavin reductase	Q923D2	2-206	peptide-Arg174+Val-peptide	N	MS	Gly	Pro	Ser	Arg	Val	Ile	Ser	Lys	Prudova et al., 2010
GPQGFQGN	PQGF	651	27.05			collagen alpha-1(I) chain	P11087	152-1207	peptide-Gly189+Phe-peptide	N	MS	Gly	Pro	Gln	Gly	Phe	Gln	Gly	Pro	Kleifeld et al., 2010
GPQGFQGP	PQGF	651	27.05			collagen alpha-1(VI) chain	Q04857	20-1025	peptide-Gly487+Leu-peptide	N	MS	Gly	Pro	Glu	Gly	Leu	Arg	Gly	Ala	Kleifeld et al., 2010
GPQGIAGQ	PQGI	461	28.82			collagen alpha-1(I) chain	P02452	162-1218	peptide-Gly775+Ile-peptide	P		Gly	Pro	Gln	Gly	Ile	Ala	Gly	Gln	Aimes & Quigley, 1995	18127
GPQGLAGQ	PQGL	67	33.52			collagen alpha-1(II) chain	P02458	182-1241	peptide-Gly975+Leu-peptide	P	MS	Gly	Pro	Gln	Gly	Leu	Ala	Gly	Gln	Zhen et al., 2008	22824
GPQGLLGA	PQGL	67	33.52			collagen alpha 2(I) chain	P08123	80-1102	peptide-Gly775+Leu-peptide	P		Gly	Pro	Gln	Gly	Leu	Leu	Gly	Ala	Aimes & Quigley, 1995	18128
GPQGLNGE	PQGL	67	33.52			collagen alpha 2(I) chain	P02465	80-1100	peptide-Gly775+Leu-peptide	P		Gly	Pro	Gln	Gly	Leu	Leu	Gly	Ala	Aimes & Quigley, 1995
GPQGLPGQ	PQGL	67	33.52			collagen alpha-1(II) chain	P02458	182-1241	peptide-Gly222+Phe-peptide	P	MS	Gly	Pro	Gln	Gly	Phe	Gln	Gly	Asn	Zhen et al., 2008	22916
GPRGRSGE	PRGR	36410	0.22			Cystatin-C	P21460	21-140	peptide-Met29+Leu-peptide	N	MS	Gly	Pro	Arg	Met	Leu	Gly	Ala	Pro	Prudova et al., 2010
GPRMLGAP	PRML	297	30.6			T-complex protein 1 subunit theta	P50990	38-61	peptide-Gly51+Met-peptide	N	MS	Gly	Pro	Asn	Gly	Met	Asn	Lys	Met	Schilling & Overall, 2008
GPSGDQGA	PSGD	42623	0.16			RNA-binding protein 12	Q9NTZ6	392-410	QNMGPSG+QTHPPPQTLPR	N	MS	Gly	Pro	Ser	Gly	Gln	Thr	His	Pro	Schilling & Overall, 2008
GPSGIAGP	PSGI	86	33.2			collagen alpha-1(II) chain	P02458	182-1241	peptide-Gly537+Leu-peptide	P	MS	Gly	Pro	Ser	Gly	Leu	Ala	Gly	Pro	Zhen et al., 2008	22957
GPSGKDGA	PSGK	11338	2.08			microtubule-associated protein 1S	Q66K74	926-944	GPSG+SASSRPGVSATPPK	N	MS	Gly	Pro	Ser	Gly	Ser	Ala	Ser	Ser	Schilling & Overall, 2008
GPSGLAGP	PSGL	7	35.5			collagen alpha-1(II) chain	P02458	182-1241	peptide-Gly1173+Lys-peptide	P	MS	Gly	Pro	Ser	Gly	Lys	Asp	Gly	Ala	Zhen et al., 2008	22832
GPSGQTHP	PSGQ	759	26.12			Collagen alpha-2(I) chain	Q01149	86-1108	peptide-Gly808+Ile-peptide	N	MS	Gly	Pro	Ser	Gly	Ile	Ala	Gly	Pro	Prudova et al., 2010
GPSGSASS	PSGS	10750	2.33			Serpin H1	P19324	18-417	peptide-Ser138+Val-peptide	N	MS	Gly	Pro	Ser	Ser	Val	Ser	Phe	Ala	auf dem Keller et al., 2010
GPSRVISK	PSRV	5260	9.2			collagen alpha-1(II) chain	P02458	182-1241	peptide-Gly1149+Asp-peptide	P	MS	Gly	Pro	Ser	Gly	Asp	Gln	Gly	Ala	Zhen et al., 2008	22830
GPSSVSFA	PSSV	1685	20.49			DJ-1 putative peptidase	Q99497	99-122	peptide-Ala111+Leu-peptide	N	MS	Gly	Pro	Thr	Ala	Leu	Leu	Ala	His	Schilling & Overall, 2008
GPTALLAH	PTAL	114	32.89			collagen alpha-1(II) chain	P02458	182-1241	peptide-Gly1083+Lys-peptide	P	MS	Gly	Pro	Thr	Gly	Lys	Gln	Gly	Asp	Zhen et al., 2008	22926
GPTGKQGD	PTGK	75132	0.04			collagen alpha-2(I) chain	Q01149	86-1108	peptide-Gly763+Ser-peptide	N	MS	Gly	Pro	Thr	Gly	Ser	Val	Gly	Ala	Kleifeld et al., 2010
GPTGSVGA	PTGS	78410	0.04			collagen alpha-1(II) chain	P02458	182-1241	peptide-Gly879+Val-peptide	P	MS	Gly	Pro	Thr	Gly	Val	Thr	Gly	Pro	Zhen et al., 2008	22634
GPTGVTGP	PTGV	3664	13.32			Heterogeneous nuclear ribonucleoprotein U	Q8VEK3	2-800	peptide-Ser187+Leu-peptide	N	MS	Gly	Pro	Thr	Ser	Leu	Phe	Ala	Val	Prudova et al., 2010
GPTSLFAV	PTSL	449	28.93			Methionine aminopeptidase 2	O08663	2-478	peptide-Arg337+Ile-peptide	N	MS	Gly	Pro	Tyr	Arg	Ile	His	Ala	Gly	Prudova et al., 2010
GPVGVFEW	PVGV	587	27.66			Phosphoglycerate kinase 1	P09411	2-417	peptide-Gly341+Val-peptide	N	MS	Gly	Pro	Val	Gly	Val	Phe	Glu	Trp	Prudova et al., 2010
GPVKVVVG	PVKV	79986	0			protein-glutamine gamma-glutamyltransferase 2 isoform a	P21980	2-687	peptide-Pro375+Val-peptide	P		Gly	Pro	Val	Pro	Val	Arg	Ala	Ile	Belkin et al., 2004	18839
GPVNYSVT	PVNY	516	28.32			phosphoglycerate kinase 1 (EC 2.7.2.3)	P00558	332-350	QIVWNGPVG+VFEWEAFAR	N	MS	Gly	Pro	Val	Gly	Val	Phe	Glu	Trp	Schilling & Overall, 2008
GPVPVRAI	PVPV	1229	23.04			Eukaryotic peptide chain release factor subunit 1	Q8BWY3	2-437	peptide-Asp231+Phe-peptide	N	MS	Gly	Ser	Ala	Asp	Phe	Lys	Thr	Glu	auf dem Keller et al., 2010
GPYDVVVL	PYDV	51617	0.11			Interleukin-1 beta	P01584	117-269	peptide-Glu141+Leu-peptide	P	NT	Gly	Pro	Tyr	Glu	Leu	Lys	Ala	Leu	Ito et al., 1996	3226
GPYELKAL	PYEL	1788	19.91			Uncharacterized protein KIAA1704	Q69ZC8	2-346	peptide-Asn163+Tyr-peptide	N	MS	Gly	Pro	Val	Asn	Tyr	Ser	Val	Thr	Prudova et al., 2010
GPYRIHAG	PYRI	10717	2.34			DJ-1 putative peptidase	Q99497	63-89	peptide-Asp68+Val-peptide	N	MS	Gly	Pro	Tyr	Asp	Val	Val	Val	Leu	Schilling & Overall, 2008
GQRGIVGL	QRGI	6090	7.48			collagen alpha-1(I) chain	P11087	152-1207	peptide-Gly948+Val-peptide	N	MS	Gly	Gln	Arg	Gly	Val	Val	Gly	Leu	Kleifeld et al., 2010
GQRGVVGL	QRGV	93675	0			Peptidyl-prolyl cis-trans isomerase FKBP4	P30416	2-458	peptide-His363+Leu-peptide	N	MS	Gly	Glu	Ala	His	Leu	Ala	Val	Asn	auf dem Keller et al., 2010
GRPRHQGV	RPRH	12377	1.74			78 kDa glucose-regulated protein	P20029	20-655	peptide-Glu52+Ile-peptide	N	MS	Gly	Arg	Val	Glu	Ile	Ile	Ala	Asn	auf dem Keller et al., 2010
GRRALKTV	RRAL	149916	0			actin, alpha cardiac muscle 1	P68033	3-377	peptide-Arg41+His-peptide	N	MS	Gly	Arg	Pro	Arg	His	Gln	Gly	Val	Kleifeld et al., 2010
GRVEIIAN	RVEI	89816	0			E3 ubiquitin-protein ligase TRIP12, Isoform 3	Q14669-3	1254-1269	VEPVGNAP+LLALVHK	N	MS	Gly	Asn	Ala	Pro	Leu	Leu	Ala	Leu	Schilling & Overall, 2008
GSADFKTE	SADF	58248	0.08			SH3 domain-binding glutamic acid-rich-like protein 3	Q91VW3	1993-01-01	peptide-Glu16+Ile-peptide	N	MS	Gly	Ser	Arg	Glu	Ile	Lys	Ser	Gln	auf dem Keller et al., 2010
GSGLCKAG	SGLC	50486	0.12			Actin, gamma-enteric smooth muscle	P63268	3-376	peptide-Leu17+Cys-peptide	N	MS	Gly	Ser	Gly	Leu	Cys	Lys	Ala	Gly	auf dem Keller et al., 2010
GSGMCKAG	SGMC	72043	0.05			copine-3	O75131	211-235	peptide-Asp224+Leu-peptide	N	MS	Gly	Ser	His	Asp	Leu	Ile	Gly	Thr	Schilling & Overall, 2008
GSHDLIGT	SHDL	84502	0			myelin basic protein isoform 1	P04370	1-246	peptide-Pro203+Gln-peptide	P	MS	Gly	Ser	Leu	Pro	Gln	Lys	Ser	Gln	Shiryaev et al., 2009	25546
GSKYLATA	SKYL	7943	4.49			Small acidic protein	Q9R0P4	1-181	peptide-Asn26+Trp-peptide	N	MS	Gly	Ser	Ser	Asn	Trp	Glu	Ala	Ala	auf dem Keller et al., 2010
GSLPQKSQ	SLPQ	23393	0.51			myelin basic protein isoform 1	P02686	135-304	peptide-Tyr15+Leu-peptide	P	MS	Gly	Ser	Lys	Tyr	Leu	Ala	Thr	Ala	Shiryaev et al., 2009	25381
GSQATDFG	SQAT	91843	0			CALU protein	Q6IAW5	293-311	YD+LFVGSQATDFGEALVR	N	MS	-	-	Tyr	Asp	Leu	Phe	Val	Gly	Schilling & Overall, 2008
GSREIKSQ	SREI	106673	0			Calumenin	O35887	20-315	peptide-Ala302+Thr-peptide	N	MS	Gly	Ser	Gln	Ala	Thr	Asp	Phe	Gly	auf dem Keller et al., 2010
GSSNWEAA	SSNW	8862	3.54			Serine/threonine-protein phosphatase 2A activator	P58389	2-323	peptide-Gln226+Leu-peptide	N	MS	Gly	Ser	Ser	Gln	Leu	Ile	Asp	His	auf dem Keller et al., 2010
GSSQLIDH	SSQL	14458	1.28			Filamin-A	Q8BTM8	2647-02-01	peptide-Ser1520+Ile-peptide	N	MS	Gly	Ser	Tyr	Ser	Ile	Ser	Val	Leu	Prudova et al., 2010
GSYSISVL	SYSI	86042	0			SUMO-activating enzyme subunit 2	Q9UBT2	138-157	SGTAG+YLGQVTTIKKGVTE	N	MS	Gly	Thr	Ala	Gly	Tyr	Leu	Gly	Gln	Schilling & Overall, 2008
GTAFIQTQ	TAFI	4920	9.99			Pyruvate kinase isozymes M1/M2	P52480	2-531	peptide-Phe12+Ile-peptide	N	MS	Gly	Thr	Ala	Phe	Ile	Gln	Thr	Gln	auf dem Keller et al., 2010
GTAGYLGQ	TAGY	6369	6.88			pyruvate kinase	Q504U3	1932-03-01	peptide-Phe12+Ile-peptide	N	MS	Gly	Thr	Ala	Phe	Ile	Gln	Thr	Gln	Schilling & Overall, 2008
GTASLIED	TASL	2271	17.89			Talin-1	P26039	2541-01-01	peptide-Ala2145+Leu-peptide	N	MS	Gly	Thr	Arg	Ala	Leu	Glu	Ala	Thr	auf dem Keller et al., 2010
GTIGLIHA	TIGL	31982	0.28			Phosphoglycerate kinase 1	P09411	2-417	peptide-Ser354+Leu-peptide	N	MS	Gly	Thr	Lys	Ser	Leu	Met	Asp	Glu	auf dem Keller et al., 2010
GTIRGDFC	TIRG	14723	1.24			ubiquitinyl hydrolase-L1	P09936	83-105	peptide-Gly94+Leu-peptide	N	MS	Gly	Thr	Ile	Gly	Leu	Ile	His	Ala	Schilling & Overall, 2008
GTKSLMDE	TKSL	79920	0			NADH dehydrogenase	Q53G70	302-329	peptide-Asn313+Leu-peptide	N	MS	Gly	Trp	Asp	Asn	Leu	Leu	Ala	Val	Schilling & Overall, 2008
GTRALEAT	TRAL	3312	14.38			Nucleoside diphosphate kinase B	Q01768	2-152	peptide-Arg105+Gly-peptide	N	MS	Gly	Thr	Ile	Arg	Gly	Asp	Phe	Cys	auf dem Keller et al., 2010
GVAAIGGA	VAAI	368	29.77			actin-related protein 2	P61160	258-294	peptide-Glu280+Leu-peptide	N	MS	Gly	Val	Ala	Glu	Leu	Leu	Phe	Asn	Schilling & Overall, 2008
GVAELLFN	VAEL	570	27.87			60 kDa heat shock protein, mitochondrial	P10809		peptide-Ser222+Leu-peptide	N	MS	Gly	Val	Ala	Ser	Leu	Leu	Thr	Thr	Schilling & Overall, 2008
GVASLLTT	VASL	97	33.08			cDNA, FLJ92534, highly similar to Homo sapiens heat shock 60kDa protein 1	B2R5M6	526-551	peptide-Ser537+Leu-peptide	N	MS	Gly	Val	Ala	Ser	Leu	Leu	Thr	Thr	Schilling & Overall, 2008
GVDSLITL	VDSL	11220	2.12			FSCN1 protein	Q96IH1	174-192	DVPWGVDS+LITLAFQDQR	N	MS	Gly	Val	Asp	Ser	Leu	Ile	Thr	Leu	Schilling & Overall, 2008
GVFNLAVV	VFNL	3273	14.5			Serine/threonine-protein kinase OSR1	Q6P9R2	1-527	peptide-Ala169+Phe-peptide	N	MS	Gly	Val	Ser	Ala	Phe	Leu	Ala	Thr	auf dem Keller et al., 2010
GVGDMVMA	VGDM	4227	11.83			Elongation factor 1-alpha 1	P10126	1-462	peptide-Glu122+Phe-peptide	N	MS	Gly	Val	Gly	Glu	Phe	Glu	Ala	Gly	auf dem Keller et al., 2010
GVGEFEAG	VGEF	5434	8.8			trimeric intracellular cation channel type B	Q9NVV0	261-283	peptide-Ser269+Leu-peptide	N	MS	Gly	Val	Gly	Ser	Leu	Ala	Ser	Lys	Schilling & Overall, 2008
GVGRMFIL	VGRM	2626	16.58			60S ribosomal protein L23	P62829	51-67	LPAAGVGD+MVMATVKK	N	MS	Gly	Val	Gly	Asp	Met	Val	Met	Ala	Schilling & Overall, 2008
GVGSLASK	VGSL	364	29.84			histone H2A type 2-B	Q8IUE6	93-122	peptide-Pro110+Asn-peptide	N	MS	Gly	Val	Leu	Pro	Asn	Ile	Gln	Ala	Schilling & Overall, 2008
GVKQLIVG	VKQL	9918	2.76			Putative elongation factor 1-alpha-like 3	Q5VTE0	135-168	peptide-Gln147+Leu-peptide	N	MS	Gly	Val	Lys	Gln	Leu	Ile	Val	Gly	Schilling & Overall, 2008
GVLPNIQA	VLPN	88245	0			histone H2A type 1-B	P04908	93-122	peptide-Pro110+Asn-peptide	N	MS	Gly	Val	Leu	Pro	Asn	Ile	Gln	Ala	Schilling & Overall, 2008
GVQAMVEF	VQAM	1502	21.36			NAD(P) transhydrogenase, mitochondrial	Q13423	69-92	peptide-Asn81+Leu-peptide	N	MS	Gly	Val	Gln	Asn	Leu	Val	Lys	Gln	Schilling & Overall, 2008
GVQNLVKQ	VQNL	455	28.87			FACT complex subunit SPT16	Q9Y5B9	895-914	GVQS+LNWTKIMKTIVDDPE	N	MS	Gly	Val	Gln	Ser	Leu	Asn	Trp	Thr	Schilling & Overall, 2008
GVQSLNWT	VQSL	1117	23.77			prefoldin subunit 1	O60925	62-74	GVGR+MFILQSKE	N	MS	Gly	Val	Gly	Arg	Met	Phe	Ile	Leu	Schilling & Overall, 2008
GVRDYAAY	VRDY	3624	13.43			fascin	Q16658	167-185	DVPWGVDS+LITLAFQDQR	N	MS	Gly	Val	Asp	Ser	Leu	Ile	Thr	Leu	Schilling & Overall, 2008
GVSAFLAT	VSAF	1177	23.37			zinc finger protein 294	O94822	501-526	peptide-Asn517+Leu-peptide	N	MS	Gly	Val	Ser	Asn	Leu	Leu	Gln	Val	Schilling & Overall, 2008
GVSFWTQD	VSFW	6532	6.55			U4/U6.U5 tri-snRNP-associated protein 1	Q9Z315	1-806	peptide-Thr235+Leu-peptide	N	MS	Gly	Val	Ser	Thr	Leu	Val	Glu	Glu	auf dem Keller et al., 2010
GVSMLYSF	VSML	1224	23.08			Protein phosphatase 1 regulatory subunit 12A	Q9DBR7	1-1029	peptide-Phe856+Trp-peptide	N	MS	Gly	Val	Ser	Phe	Trp	Thr	Gln	Asp	auf dem Keller et al., 2010
GVSNLLQV	VSNL	56	33.88			methylmalonyl-CoA mutase, mitochondrial precursor	P22033	715-744	peptide-Asn720+Val-peptide	N	MS	Gly	Val	Ser	Asn	Val	Phe	Gly	Pro	Schilling & Overall, 2008
GVSNVFGP	VSNV	3008	15.24			ubiquitin-like modifier-activating enzyme 1	P22314	986-1009	peptide-Met996+Leu-peptide	N	MS	Gly	Val	Ser	Met	Leu	Tyr	Ser	Phe	Schilling & Overall, 2008
GVSTLVEE	VSTL	1773	20			fructose-bisphosphate aldolase A	P04075	90-122	peptide-Gly106+Ile-peptide	N	MS	Gly	Val	Val	Gly	Ile	Lys	Val	Asp	Schilling & Overall, 2008
GVVGIKVD	VVGI	4431	11.28			Fructose-bisphosphate aldolase A	P05064	2-364	peptide-Pro115+Leu-peptide	N	MS	Gly	Val	Val	Pro	Leu	Ala	Gly	Thr	auf dem Keller et al., 2010
GVVPLAGT	VVPL	4889	10.06			peptidyl-prolyl cis-trans isomerase FKBP1A	P26883	2-108	peptide-Leu98+Val-peptide	N	MS	His	Ala	Thr	Leu	Val	Phe	Asp	Val	Kleifeld et al., 2010
GWDNLLAV	WDNL	56008	0.09			NDUFV1 protein	Q6IBR3	302-329	peptide-Asn313+Leu-peptide	N	MS	Gly	Trp	Asp	Asn	Leu	Leu	Ala	Val	Schilling & Overall, 2008
GWGNLVYV	WGNL	3180	14.73			TAR DNA-binding protein 43	Q921F2	1-414	peptide-Asn70+Leu-peptide	N	MS	Gly	Trp	Gly	Asn	Leu	Val	Tyr	Val	Kleifeld et al., 2010
GYAFIEFA	YAFI	31478	0.29			Voltage-gated potassium channel subunit beta-2	P62482	1-367	peptide-Trp272+Leu-peptide	N	MS	Gly	Tyr	Gln	Trp	Leu	Lys	Asp	Lys	auf dem Keller et al., 2010
GYGAYLAQ	YGAY	2147	18.4			adenosine deaminase, RNA-specific isoform ADAR-a variant	Q59EC0	1222-1237	DMGYGN+WISKPQEEK	N	MS	Gly	Tyr	Gly	Asn	Trp	Ile	Ser	Lys	Schilling & Overall, 2008
GYGNWISK	YGNW	12545	1.69			cleavage and polyadenylation specificity factor subunit 5	O43809	192-221	peptide-Pro210+Ile-peptide	N	MS	Gly	Tyr	Gly	Pro	Ile	Ile	Ser	Ser	Schilling & Overall, 2008
GYGPIISS	YGPI	18582	0.79			NADP-dependent malic enzyme	P48163	372-392	PTALIGVAA+IGGAFSEQILK	N	MS	Gly	Val	Ala	Ala	Ile	Gly	Gly	Ala	Schilling & Overall, 2008
GYQWLKDK	YQWL	3520	13.75			Proteasome subunit beta type-4	P99026	46-264	peptide-Ala188+Tyr-peptide	N	MS	Gly	Tyr	Gly	Ala	Tyr	Leu	Ala	Gln	auf dem Keller et al., 2010
-GYSLVSG	GYSL	71306	0.05			serine hydroxymethyltransferase	Q5BJF5	344-365	peptide-Ser347+Leu-peptide	N	MS	-	Gly	Tyr	Ser	Leu	Val	Ser	Gly	Schilling & Overall, 2008
-HAKLQAA	HAKL	3029	15.18			GTP-binding nuclear protein Ran	P62826	104-119	HRD+LVRVCENIPIVL	N	MS	-	His	Arg	Asp	Leu	Val	Arg	Val	Schilling & Overall, 2008
HATLVFDV	ATLV	27196	0.39			mitochondrial precursor proteins import receptor	O94826	402-419	VYHHRGQ+LKILLDQVEE	N	MS	His	Arg	Gly	Gln	Leu	Lys	Ile	Leu	Schilling & Overall, 2008
--HCIIGR	-HCI					protein FAM75A6	Q5VVP1	358-368	HL+NSLGNLAK	N	MS	-	-	His	Leu	Asn	Ser	Leu	Gly	Schilling & Overall, 2008
HFAMMHGG	FAMM	7110	5.57			Annexin A3	P12429	73-97	peptide-His82+Leu-peptide	N	MS	His	Phe	Glu	His	Leu	Met	Val	Ala	Schilling & Overall, 2008
HFEHLMVA	FEHL	14927	1.21			proliferation-associated protein 2G4	Q9UQ80	69-102	peptide-Pro91+Leu-peptide	N	MS	His	Phe	Ser	Pro	Leu	Lys	Ser	Asp	Schilling & Overall, 2008
HFSPLKSD	FSPL	3161	14.78			PA2G4 protein	Q05D08	99-132	peptide-Pro121+Leu-peptide	N	MS	His	Phe	Ser	Pro	Leu	Lys	Ser	Asp	Schilling & Overall, 2008
HGAALLSH	GAAL	2850	15.72			UPF0609 protein C4orf27	Q9NWY4	220-239	TFHGAG+LVVPVDKNDVGYR	N	MS	His	Gly	Ala	Gly	Leu	Val	Val	Pro	Schilling & Overall, 2008
HGAGLVVP	GAGL	5786	8.05			Carboxypeptidase E	Q00493	43-476	peptide-Asp251+Leu-peptide	N	MS	His	Gly	Gly	Asp	Leu	Val	Ala	Asn	auf dem Keller et al., 2010
HGGDLVAN	GGDL	32645	0.27			beta-amyloid protein 40	P05067	672-711	peptide-Lys687+Leu-peptide	P		His	His	Gln	Lys	Leu	Val	Phe	Phe	Roher et al., 1995	21332
HHQKLVFF	HQKL	10822	2.29			NADP-dependent malic enzyme	P48163	130-146	GHIAS+VLNAWPEDVIK	N	MS	His	Ile	Ala	Ser	Val	Leu	Asn	Ala	Schilling & Overall, 2008
HIASVLNA	IASV	3504	13.79			60S acidic ribosomal protein P0	P14869	1-317	peptide-Gly84+Asn-peptide	N	MS	His	Ile	Arg	Gly	Asn	Val	Gly	Phe	auf dem Keller et al., 2010
HIGLVYSG	IGLV	21233	0.61			histidine triad nucleotide-binding protein 1	P70349	2-126	peptide-Gln62+Ile-peptide	N	MS	His	Ile	Ser	Gln	Ile	Ser	Val	Ala	Kleifeld et al., 2010
HIRGNVGF	IRGN	19770	0.7			Proteasome subunit alpha type-2	P49722	2-234	peptide-Leu74+Val-peptide	N	MS	His	Ile	Gly	Leu	Val	Tyr	Ser	Gly	auf dem Keller et al., 2010
HISQISVA	ISQI	3403	14.06			Dynactin subunit 1, isoform 5	Q14203-5	962-976	LHISQ+LQHENSILK	N	MS	His	Ile	Ser	Gln	Leu	Gln	His	Glu	Schilling & Overall, 2008
HISQLQHE	ISQL	812	25.7			26S proteasome non-ATPase regulatory subunit 11	O00231	348-362	HISS+LIKLSKADVE	N	MS	His	Ile	Ser	Ser	Leu	Ile	Lys	Leu	Schilling & Overall, 2008
HISSLIKL	ISSL	375	29.71			Heat shock protein HSP 90-alpha	P07901	2-733	peptide-Phe494+Ile-peptide	N	MS	His	Ile	Tyr	Phe	Ile	Thr	Gly	Glu	Prudova et al., 2010
HIYFITGE	IYFI	48346	0.13			cDNA FLJ78501, highly similar to Homo sapiens serpin peptidase inhibitor, clade H	A8K259	319-334	HLAG+LGLTEAIDKNK	N	MS	His	Leu	Ala	Gly	Leu	Gly	Leu	Thr	Schilling & Overall, 2008
HKLRSAVE	KLRS	33201	0.26			moesin	P26038	140-159	VHKSG+YLAGDKLLPQRVLE	N	MS	His	Lys	Ser	Gly	Tyr	Leu	Ala	Gly	Schilling & Overall, 2008
HKSGYLAG	KSGY	48430	0.12			UV excision repair protein RAD23 homolog B	P54728	1-416	peptide-Tyr366+Ile-peptide	N	MS	His	Met	Asn	Tyr	Ile	Gln	Val	Thr	auf dem Keller et al., 2010
HLAGLGLT	LAGL	174	32.24			peroxiredoxin-6	P30041	78-96	HLAW+SKDINAYNCEEPTE	N	MS	His	Leu	Ala	Trp	Ser	Lys	Asp	Ile	Schilling & Overall, 2008
HLAWSKDI	LAWS	2746	16.1			Heterogeneous nuclear ribonucleoproteins A2/B1	O88569	1-353	peptide-Asp130+Tyr-peptide	N	MS	His	Leu	Arg	Asp	Tyr	Phe	Glu	Glu	auf dem Keller et al., 2010
HLEKLLGP	LEKL	14735	1.24			adenosylhomocysteinase	P23526	396-411	AHLGK+LNVKLTKLTE	N	MS	His	Leu	Gly	Lys	Leu	Asn	Val	Lys	Schilling & Overall, 2008
HLGKLNVK	LGKL	1099	23.88			Moesin	P26041	2-577	peptide-Ala524+Leu-peptide	N	MS	His	Leu	Lys	Ala	Leu	Thr	Ser	Glu	Prudova et al., 2010
HLKALTSE	LKAL	2167	18.35			fatty acid synthase	P49327	802-825	peptide-Gly807+Ile-peptide	N	MS	His	Leu	Ser	Gly	Ile	Asp	Ala	Asn	Schilling & Overall, 2008
--HLNSLG	-HLN					rab GDP dissociation inhibitor alpha	P31150	300-309	IC+ILSHPIK	N	MS	-	-	Ile	Cys	Ile	Leu	Ser	His	Schilling & Overall, 2008
HLRDYFEE	LRDY	5180	9.38			Alpha-actinin-1	Q7TPR4	1-892	peptide-Lys47+Ala-peptide	N	MS	His	Leu	Arg	Lys	Ala	Gly	Thr	Gln	auf dem Keller et al., 2010
HLRKAGTQ	LRKA	115181	0			Alpha-actinin-3	O88990	1-900	peptide-Lys60+Ala-peptide	N	MS	His	Leu	Arg	Lys	Ala	Gly	Thr	Gln	auf dem Keller et al., 2010
HLSGIDAN	LSGI	1220	23.1			dickkopf-related protein 3	Q9QUN9	23-349	peptide-Arg66+Ser-peptide	N	MS	His	Lys	Leu	Arg	Ser	Ala	Val	Glu	Kleifeld et al., 2010
HMNYIQVT	MNYI	8163	4.21			poly(rC)-binding protein 1	Q15365	243-268	peptide-Met250+Met-peptide	N	MS	His	Phe	Ala	Met	Met	His	Gly	Gly	Schilling & Overall, 2008
HNNNISAV	NNNI	69275	0.05			NAG22 protein	Q9NYG1	396-425	peptide-Ala415+Ile-peptide	N	MS	His	Gln	Ala	Ala	Ile	Val	Ser	Lys	Schilling & Overall, 2008
HNRGIKLV	NRGI	5511	8.64			Decorin	P28654	31-354	peptide-Asn298+Ile-peptide	N	MS	His	Asn	Asn	Asn	Ile	Ser	Ala	Val	auf dem Keller et al., 2010
HPAAKSMI	PAAK	4530	11.01			synaptic vesicle membrane protein VAT-1 homolog	Q99536	22-49	peptide-Ala34+Ser-peptide	N	MS	His	Pro	Ala	Ala	Ser	Glu	Gly	Ala	Schilling & Overall, 2008
HPAASEGA	PAAS	1163	23.45			C-terminal binding protein 1 isoform 2	Q13363-2	2020-01-30	peptide-Pro17+Leu-peptide	N	MS	His	Pro	Arg	Pro	Leu	Val	Ala	Leu	Schilling & Overall, 2008
HPDGLIFG	PDGL	6714	6.23			tubulin alpha-8 chain	Q9NY65	84-105	peptide-Gln91+Leu-peptide	N	MS	His	Pro	Glu	Gln	Leu	Ile	Thr	Gly	Schilling & Overall, 2008
HPEQLITG	PEQL	3975	12.46			tubulin alpha-4A chain	P68366	84-105	peptide-Gln91+Leu-peptide	N	MS	His	Pro	Glu	Gln	Leu	Ile	Thr	Gly	Schilling & Overall, 2008
HPGQISAG	PGQI	1733	20.22			elongation factor 1-alpha 1	P10126	1-462	peptide-Gln352+Ile-peptide	N	MS	His	Pro	Gly	Gln	Ile	Ser	Ala	Gly	Kleifeld et al., 2010
HPHGVKRS	PHGV	5774	8.08			T-complex protein 1 subunit epsilon	P80316	2-541	peptide-Arg132+Ile-peptide	N	MS	His	Pro	Ile	Arg	Ile	Ala	Asp	Gly	auf dem Keller et al., 2010
HPIQWNAP	PIQW	5694	8.26			insulin-like growth factor binding protein 3	P17936	28-291	peptide-His169+Ser-peptide	P		His	Pro	Leu	His	Ser	Lys	Ile	Ile	Gibson & Cohen, 1999
HPIRIADG	PIRI	13173	1.53			fibronectin	P02751	32-2386	peptide-Gln629+Trp-peptide	P	NT	His	Pro	Ile	Gln	Trp	Asn	Ala	Pro	Doucet & Overall, 2010
HPLHSKII	PLHS	3633	13.4			phosphatidylethanolamine-binding protein 1	P30086	1939-07-01	peptide-His26+Val-peptide	N	MS	His	Pro	Leu	His	Val	Thr	Tyr	Ala	Schilling & Overall, 2008
HPLHVTYA	PLHV	2774	15.98			26S proteasome non-ATPase regulatory subunit 7	P51665	2020-08-25	VVVHPLV+LLSVVDHFNR	N	MS	His	Pro	Leu	Val	Leu	Leu	Ser	Val	Schilling & Overall, 2008
HPLVLLSV	PLVL	9171	3.29			brevican core protein precursor	P55068	23-833	peptide-Ala360+Phe-peptide	P		His	Pro	Ser	Ala	Phe	Ser	Glu	Ala	Nakamura et al., 2001	18214
HPNNSFNP	PNNS	48827	0.12			pre-mRNA-processing factor 19	Q9UMS4	343-375	peptide-Gly362+Leu-peptide	N	MS	His	Pro	Asp	Gly	Leu	Ile	Phe	Gly	Schilling & Overall, 2008
HPRPLVAL	PRPL	35	34.33			putative uncharacterized protein DKFZp434B0914	Q9NSY3	2020-01-30	peptide-Pro17+Leu-peptide	N	MS	His	Pro	Arg	Pro	Leu	Val	Ala	Leu	Schilling & Overall, 2008
HPRPWLGL	PRPW	186	32.11			Insulin-like growth factor-binding protein 4	P47879	22-254	peptide-Asn126+Ser-peptide	N	MS	His	Pro	Asn	Asn	Ser	Phe	Asn	Pro	Prudova et al., 2010
HPSAFSEA	PSAF	103	32.96			heterogeneous nuclear ribonucleoprotein L	P14866	490-511	peptide-Asn470+Val-peptide	N	MS	His	Pro	Ser	Asn	Val	Leu	His	Phe	Schilling & Overall, 2008
HPSNVLHF	PSNV	722	26.41			endoplasmin	P14625	511-530	FQSSHHPTD+ITSLDQYVER	N	MS	His	Pro	Thr	Asp	Ile	Thr	Ser	Leu	Schilling & Overall, 2008
HPTDITSL	PTDI	8265	4.09			succinate dehydrogenase [ubiquinone] flavoprotein subunit, mitochondrial precursor	P31040	282-312	peptide-Gly299+Ile-peptide	N	MS	His	Pro	Thr	Gly	Ile	Tyr	Gly	Ala	Schilling & Overall, 2008
HPTGIYGA	PTGI	548	28.04			Actin, alpha skeletal muscle	P68134	3-377	peptide-Leu106+Leu-peptide	N	MS	His	Pro	Thr	Leu	Leu	Thr	Glu	Ala	Prudova et al., 2010
HPTLLTEA	PTLL	5679	8.3			Actin, gamma-enteric smooth muscle	P63268	3-376	peptide-Leu105+Leu-peptide	N	MS	His	Pro	Thr	Leu	Leu	Thr	Glu	Ala	auf dem Keller et al., 2010
HPTSVISG	PTSV	22526	0.55			SPARC	P09486	18-303	peptide-Glu214+Leu-peptide	P		His	Pro	Val	Glu	Leu	Leu	Ala	Arg	Sasaki et al., 1997	18253
HPVELLAR	PVEL	838	25.47			Actin, cytoplasmic 1	P60710	1-375	peptide-Leu104+Leu-peptide	N	MS	His	Pro	Val	Leu	Leu	Thr	Glu	Ala	auf dem Keller et al., 2010
HPVLLTEA	PVLL	3039	15.16			Serine/threonine-protein phosphatase 2A 55 kDa regulatory subunit B alpha isoform	Q6P1F6	2-447	peptide-Glu41+Leu-peptide	N	MS	His	Ser	Gly	Glu	Leu	Leu	Ala	Thr	auf dem Keller et al., 2010
HQAAIVSK	QAAI	3665	13.31			caldesmon	Q9UD91	652-680	peptide-Ala670+Ile-peptide	N	MS	His	Gln	Ala	Ala	Ile	Val	Ser	Lys	Schilling & Overall, 2008
HQGVMVGM	QGVM	74150	0.04			nucleophosmin/B23.2	Q9BYG9	39-56	HQLS+LRTVSLGAGAKDE	N	MS	His	Gln	Leu	Ser	Leu	Arg	Thr	Val	Schilling & Overall, 2008
HQLSLRTV	QLSL	23700	0.5			Twinfilin-1	Q91YR1	2-350	peptide-Gly6+Ile-peptide	N	MS	His	Gln	Thr	Gly	Ile	Gln	Ala	Ser	auf dem Keller et al., 2010
HQRKLEAE	QRKL	147195	0			Actin, alpha skeletal muscle	P68134	3-377	peptide-Val45+Met-peptide	N	MS	His	Gln	Gly	Val	Met	Val	Gly	Met	Prudova et al., 2010
HQTGIQAS	QTGI	118739	0			Ubiquitin-conjugating enzyme E2 Z	Q3UE37	1-356	peptide-Ala80+Leu-peptide	N	MS	His	Gly	Ala	Ala	Leu	Leu	Ser	His	Prudova et al., 2010
-HRDLVRV	HRDL	7887	4.55			putative heat shock protein HSP 90-beta-3	Q58FF7	183-198	HSQ+FIGYPITLYLEK	N	MS	-	His	Ser	Gln	Phe	Ile	Gly	Tyr	Schilling & Overall, 2008
HRGQLKIL	RGQL	6985	5.77			ubiquitin-like modifier-activating enzyme 1	P22314	178-195	CHNRG+IKLVVADTRGLF	N	MS	His	Asn	Arg	Gly	Ile	Lys	Leu	Val	Schilling & Overall, 2008
HSGELLAT	SGEL	50549	0.11			UPF0027 protein C22orf28	Q9Y3I0	214-244	peptide-Glu230+Ile-peptide	N	MS	His	Tyr	Ala	Glu	Ile	Gln	Val	Val	Schilling & Overall, 2008
-HSQFIGY	HSQF	26897	0.39			heat shock protein HSP 90-beta	P08238	204-219	HSQ+FIGYPITLYLEK	N	MS	-	His	Ser	Gln	Phe	Ile	Gly	Tyr	Schilling & Overall, 2008
HVAKIIKP	VAKI	4067	12.27			uroporphyrinogen decarboxylase	P06132	332-359	peptide-Ala352+Phe-peptide	N	MS	His	Val	Gly	Ala	Phe	Val	Asp	Ala	Schilling & Overall, 2008
HVGAFVDA	VGAF	1541	21.14			metaxin-2	O75431	71-93	peptide-Asn79+Gln-peptide	N	MS	His	Val	Gly	Asn	Gln	Val	Val	Ser	Schilling & Overall, 2008
HVGNQVVS	VGNQ	18428	0.8			cytochrome C oxidase subunit 4 isoform 1, mitochondrial precursor	P13073	48-64	VAHVKH+LSASQKALKE	N	MS	His	Val	Lys	His	Leu	Ser	Ala	Ser	Schilling & Overall, 2008
HVKHLSAS	VKHL	3133	14.86			D-3-phosphoglycerate dehydrogenase	O43175	491-522	peptide-Gly510+Ile-peptide	N	MS	His	Val	Met	Gly	Ile	Ser	Ser	Leu	Schilling & Overall, 2008
HVMGISSL	VMGI	3989	12.42			cDNA FLJ76314, highly similar to Homo sapiens WD repeat domain 1	A8K6E9	575-600	peptide-Ser581+Leu-peptide	N	MS	His	Val	Ser	Ser	Leu	Ala	Trp	Leu	Schilling & Overall, 2008
HVSSLAWL	VSSL	437	29.09			aspartate aminotransferase, mitochondrial precursor	P00505	325-338	IAAA+ILNTPDLRK	N	MS	Ile	Ala	Ala	Ala	Ile	Leu	Asn	Thr	Schilling & Overall, 2008
HYAEIQVV	YAEI	6484	6.64			phosphoglycerate mutase 1	P18669	90-106	HYGG+LTGLNKAETAAK	N	MS	His	Tyr	Gly	Gly	Leu	Thr	Gly	Leu	Schilling & Overall, 2008
HYGGLTGL	YGGL	3331	14.32			phosphoglycerate mutase 2	P15259	90-106	HYGG+LTGLNKAETAAK	N	MS	His	Tyr	Gly	Gly	Leu	Thr	Gly	Leu	Schilling & Overall, 2008
HYSELTTL	YSEL	3323	14.34			plectin 2	Q15149-9	1306-1321	THYSE+LTTLTSQYIK	N	MS	His	Tyr	Ser	Glu	Leu	Thr	Thr	Leu	Schilling & Overall, 2008
HYSNIEAN	YSNI	3195	14.68			plectin 6	Q6S380	1457-1472	THYSE+LTTLTSQYIK	N	MS	His	Tyr	Ser	Glu	Leu	Thr	Thr	Leu	Schilling & Overall, 2008
IAAAILNT	AAAI	834	25.49			Proteasome subunit beta type-4	P99026	46-264	peptide-Asp70+Met-peptide	N	MS	Ile	Ala	Ala	Asp	Met	Leu	Gly	Ser	auf dem Keller et al., 2010
IAADMLGS	AADM	11285	2.1			proteasome catalytic subunit 2	Q99436	195-223	peptide-Gly205+Ile-peptide	N	MS	Ile	Ala	Ala	Gly	Ile	Phe	Asn	Asp	Schilling & Overall, 2008
IAAGIFND	AAGI	1754	20.13			prohibitin	P35232	219-239	AAELIANS+LATAGDGLIELR	N	MS	Ile	Ala	Asn	Ser	Leu	Ala	Thr	Ala	Schilling & Overall, 2008
IACGISQG	ACGI	39766	0.19			Peroxiredoxin-1	P35700	1-199	peptide-Asp115+Tyr-peptide	N	MS	Ile	Ala	Gln	Asp	Tyr	Gly	Val	Leu	auf dem Keller et al., 2010
IADLVVGL	ADLV	15176	1.17			threonyl-tRNA synthetase, cytoplasmic	P26639	99-121	peptide-Gly108+Ile-peptide	N	MS	Ile	Ala	Cys	Gly	Ile	Ser	Gln	Gly	Schilling & Overall, 2008
IADNIIFL	ADNI	43387	0.16			Enolase	Q922A0	1-338	peptide-Leu288+Val-peptide	N	MS	Ile	Ala	Asp	Leu	Val	Val	Gly	Leu	Prudova et al., 2010
IAEAYLGK	AEAY	15720	1.09			heat shock 70 kDa protein 1	P08107	128-155	peptide-Ala133+Tyr-peptide	N	MS	Ile	Ala	Glu	Ala	Tyr	Leu	Gly	Tyr	Schilling & Overall, 2008
IAEAYLGY	AEAY	15720	1.09			fructose-bisphosphate aldolase A	P04075	16-44	peptide-Arg22+Ile-peptide	N	MS	Ile	Ala	His	Arg	Ile	Val	Ala	Pro	Schilling & Overall, 2008
-IAELLTE	IAEL	853	25.36			nucleoprotein TPR	P12270	1563-1576	IAH+LAGVKDQLTK	N	MS	-	Ile	Ala	His	Leu	Ala	Gly	Val	Schilling & Overall, 2008
-IAHLAGV	IAHL	106	32.93			proteasome catalytic subunit 3 precursor	P28074	84-99	IAS+QTVKKVIEINPY	N	MS	-	Ile	Ala	Ser	Gln	Thr	Val	Lys	Schilling & Overall, 2008
IAHRIVAP	AHRI	82590	0			histidine triad nucleotide-binding protein 1	P49773	2020-04-26	peptide-Ala8+Gln-peptide	N	MS	Ile	Ala	Lys	Ala	Gln	Val	Ala	Arg	Schilling & Overall, 2008
IAKAQVAQ	AKAQ	17876	0.84			Fructose-bisphosphate aldolase A	P05064	2-364	peptide-Arg43+Leu-peptide	N	MS	Ile	Ala	Lys	Arg	Leu	Gln	Ser	Ile	auf dem Keller et al., 2010
IAKAQVAR	AKAQ	17876	0.84			histidine triad nucleotide-binding protein 1	P70349	2-126	peptide-Ala8+Gln-peptide	N	MS	Ile	Ala	Lys	Ala	Gln	Val	Ala	Gln	Kleifeld et al., 2010
IAKRLQSI	AKRL	158735	0			exportin-1	O14980	537-553	AIIASN+IMYIVGQYPR	N	MS	Ile	Ala	Ser	Asn	Ile	Met	Tyr	Ile	Schilling & Overall, 2008
IANSLATA	ANSL	4883	10.07			prohibitin	P35232	219-239	AAE+LIANSLATAGDGLIELR	N	MS	-	Ala	Ala	Glu	Leu	Ile	Ala	Asn	Schilling & Overall, 2008
IAQDYGVL	AQDY	87801	0			histone H2A.x	P16104	100-119	VTIAQG+GVLPNIQAVLLPK	N	MS	Ile	Ala	Gln	Gly	Gly	Val	Leu	Pro	Schilling & Overall, 2008
IAQGGVLP	AQGG	48006	0.13			histone H2A type 1-B	P04908	100-119	VTIAQG+GVLPNIQAVLLPK	N	MS	Ile	Ala	Gln	Gly	Gly	Val	Leu	Pro	Schilling & Overall, 2008
IAQKIQKL	AQKI	66055	0.06			stress-induced-phosphoprotein 1	Q5TZU9	520-543	peptide-Lys530+Ile-peptide	N	MS	Ile	Ala	Gln	Lys	Ile	Gln	Lys	Leu	Schilling & Overall, 2008
IASNIMYI	ASNI	2102	18.59			uncharacterized protein	D3Z513	1-152	peptide-Ser16+Leu-peptide	N	MS	Ile	Ala	Ser	Ser	Leu	Pro	Val	Lys	Kleifeld et al., 2010
-IASQTVK	IASQ	1428	21.83			Proteasome subunit beta type-5	P28074	85-99	IAS+QTVKKVIEINPY	N	MS	-	Ile	Ala	Ser	Gln	Thr	Val	Lys	Schilling & Overall, 2008
IASSLPVK	ASSL	1444	21.69			Mitotic checkpoint protein BUB3	Q9WVA3	1-326	peptide-Ser296+Tyr-peptide	N	MS	Ile	Ala	Ser	Ser	Tyr	Met	Tyr	Glu	auf dem Keller et al., 2010
IASSYMYE	ASSY	2552	16.81			Nuclease-sensitive element-binding protein 1	P62960	2-322	peptide-Lys56+Val-peptide	N	MS	Ile	Ala	Thr	Lys	Val	Leu	Gly	Thr	auf dem Keller et al., 2010
IATKVLGT	ATKV	73585	0.04			Nidogen-1	P10493	29-1245	peptide-Asp1017+Leu-peptide	N	MS	Ile	Arg	Gln	Asp	Leu	Gly	Ser	Pro	auf dem Keller et al., 2010
ICGDIHGQ	CGDI	155169	0			U6 snRNA-associated Sm-like protein LSm2	Q9Y333	20-39	NDLSICGT+LHSVDQYLNIK	N	MS	Ile	Cys	Gly	Thr	Leu	His	Ser	Val	Schilling & Overall, 2008
ICGTLHSV	CGTL	42155	0.17			60S ribosomal protein L4	P36578	121-140	YAICSA+LAASALPALVMSK	N	MS	Ile	Cys	Ser	Ala	Leu	Ala	Ala	Ser	Schilling & Overall, 2008
--ICILSH	-ICI					rab GDP dissociation inhibitor beta	P50395	300-309	IC+ILSHPIK	N	MS	-	-	Ile	Cys	Ile	Leu	Ser	His	Schilling & Overall, 2008
ICSALAAS	CSAL	5235	9.26			Splicing factor 3A subunit 3	Q9D554	1-501	peptide-Pro105+Met-peptide	N	MS	Ile	Cys	Val	Pro	Met	Ser	Val	Glu	auf dem Keller et al., 2010
ICVPMSVE	CVPM	58462	0.08			putative uncharacterized protein DKFZp686O05147	Q7Z3H6	116-130	IEDS+PEAQILPFLR	N	MS	Ile	Glu	Asp	Ser	Pro	Glu	Ala	Gln	Schilling & Overall, 2008
IDKKAPDF	DKKA	141755	0			Radixin	P26043	1-583	peptide-Lys263+Ala-peptide	N	MS	Ile	Asp	Lys	Lys	Ala	Pro	Asp	Phe	auf dem Keller et al., 2010
IEDSPEAQ	EDSP	122562	0			Thioredoxin reductase 1, cytoplasmic	Q9JMH6-1	1-613	peptide-Glu397+Phe-peptide	N	MS	Ile	Glu	Gly	Glu	Phe	Asn	Thr	Val	auf dem Keller et al., 2010
IEGEFNTV	EGEF	152062	0			actin, cytoplasmic 1	P60709	68-84	YPIEHG+IVTNWDDMEK	N	MS	Ile	Glu	His	Gly	Ile	Val	Thr	Asn	Schilling & Overall, 2008
IEHGIVTN	EHGI	124291	0			actin, cytoplasmic 2	P63261	68-84	YPIEHG+IVTNWDDMEK	N	MS	Ile	Glu	His	Gly	Ile	Val	Thr	Asn	Schilling & Overall, 2008
IEWKRPTE	EWKR	40611	0.18			heat shock 70kDa protein 4	Q9BUK9	41-67	peptide-Ala51+Ala-peptide	N	MS	Ile	Gly	Ala	Ala	Ala	Lys	Ser	Gln	Schilling & Overall, 2008
-IEWLESH	IEWL	2262	17.91			heat shock 70 kDa protein 1	P08107	50-68	IGD+AAKNQVALNPQNTVF	N	MS	-	Ile	Gly	Asp	Ala	Ala	Lys	Asn	Schilling & Overall, 2008
IGAAAKSQ	GAAA	22233	0.56			heat shock 70 kDa protein 4	P34932	41-67	peptide-Ala51+Ala-peptide	N	MS	Ile	Gly	Ala	Ala	Ala	Lys	Ser	Gln	Schilling & Overall, 2008
IGAPIQGN	GAPI	41204	0.17			cDNA FLJ76788, highly similar to Homo sapiens splicing factor 3b, subunit 2, 145kDa	A8K485	35-53	LAEIGAP+IQGNREELVER	N	MS	Ile	Gly	Ala	Pro	Ile	Gln	Gly	Asn	Schilling & Overall, 2008
-IGCLLSG	IGCL	3766	13.01			karatin, type I cytoskeletal 18	P05783	181-200	IHG+LRKVIDDTNITRLQLE	N	MS	-	Ile	His	Gly	Leu	Arg	Lys	Val	Schilling & Overall, 2008
-IGDAAKN	IGDA	125401	0			asparagine synthetase [glutamine-hydrolyzing]	P08243	252-272	IGC+LLSGGLDSSLVAATLLK	N	MS	-	Ile	Gly	Cys	Leu	Leu	Ser	Gly	Schilling & Overall, 2008
IGGLSFET	GGLS	18471	0.8			alpha-centractin	P61163	336-355	LYSTWIGGS+ILASLDTFKK	N	MS	Ile	Gly	Gly	Ser	Ile	Leu	Ala	Ser	Schilling & Overall, 2008
IGGSILAS	GGSI	28688	0.35			beta-centractin	P42025	336-355	LYSTWIGGS+ILASLDTFKK	N	MS	Ile	Gly	Gly	Ser	Ile	Leu	Ala	Ser	Schilling & Overall, 2008
IGLMVGGV	GLMV	24432	0.47			Heat shock protein HSP 90-alpha	P07901	2-733	peptide-Pro217+Ile-peptide	N	MS	Ile	Gly	Tyr	Pro	Ile	Thr	Leu	Phe	auf dem Keller et al., 2010
IGVPIKVL	GVPI	37936	0.2			T-complex protein 1 subunit delta	P50991	126-139	GIHPT+IISESFQK	N	MS	Ile	His	Pro	Thr	Ile	Ile	Ser	Glu	Schilling & Overall, 2008
IGYPITLF	GYPI	74752	0.04			heat shock protein HSP 90-alpha A5, putative	Q58FG0	39-54	HSQ+FIGYPITLFVEK	N	MS	-	His	Ser	Gln	Phe	Ile	Gly	Tyr	Schilling & Overall, 2008
-IHGLRKV	IHGL	11660	1.96			vigilin	Q00341	1016-1036	IIA+ITGLAANLDRAKAGLLE	N	MS	-	Ile	Ile	Ala	Ile	Thr	Gly	Leu	Schilling & Overall, 2008
IHPTIISE	HPTI	120919	0			Collagen alpha-2(V) chain	Q3U962	27-1227	peptide-Thr1269+Leu-peptide	N	MS	Ile	His	Val	Thr	Leu	Lys	Ser	Leu	Prudova et al., 2010
IHVTLKSL	HVTL	56345	0.09			40S ribosomal protein S28	P62858	1969-01-01	peptide-Asn45+Val-peptide	N	MS	Ile	Ile	Arg	Asn	Val	Lys	Gly	Pro	Kleifeld et al., 2010
-IIAITGL	IIAI	82598	0			60S acidic ribosomal protein P2	P05387	25-41	ILD+SVGIEADDDRLNK	N	MS	-	Ile	Leu	Asp	Ser	Val	Gly	Ile	Schilling & Overall, 2008
IIEALLVP	IEAL	5207	9.31			T-complex protein 1 subunit zeta	P80317	2-531	peptide-Glu101+Leu-peptide	N	MS	Ile	Ile	Gly	Glu	Leu	Leu	Lys	Gln	auf dem Keller et al., 2010
IIGELLKQ	IGEL	425	29.16			beta-amyloid protein 40	P05067	672-711	peptide-Leu705+Met-peptide	P		Ile	Ile	Gly	Leu	Met	Val	Gly	Gly	Roher et al., 1995	21330
IIGLMVGG	IGLM	1895	19.51			Glutaredoxin-3	Q9CQM9	2-337	peptide-Glu220+Leu-peptide	N	MS	Ile	Ile	Lys	Glu	Leu	Glu	Ala	Ser	auf dem Keller et al., 2010
IIKELEAS	IKEL	6934	5.86			heat shock 70 kDa protein 1	P08107	597-628	peptide-Gly609+Leu-peptide	N	MS	Ile	Ile	Ser	Gly	Leu	Tyr	Gln	Gly	Schilling & Overall, 2008
IIQGMRKE	IQGM	2874	15.62			Dihydrolipoyllysine-residue succinyltransferase component of 2-oxoglutarate dehydrogenase complex, mitochondrial	Q9D2G2-1	69-454	peptide-Ala126+Leu-peptide	N	MS	Ile	Ile	Glu	Ala	Leu	Leu	Val	Pro	auf dem Keller et al., 2010
IIRNVKGP	IRNV	8122	4.25			importin subunit beta-1	Q14974	172-203	peptide-Gly180+Met-peptide	N	MS	Ile	Ile	Gln	Gly	Met	Arg	Lys	Glu	Schilling & Overall, 2008
IISGLYQG	ISGL	309	30.52			Pyruvate kinase isozymes M1/M2	P52480	2-531	peptide-Lys270+Ile-peptide	N	MS	Ile	Ile	Ser	Lys	Ile	Glu	Asn	His	auf dem Keller et al., 2010
IISKIENH	ISKI	6286	7.05			fibrillin-2	P35556	29-2911	peptide-Gly487+Leu-peptide	P		Ile	Ile	Thr	Gly	Leu	Thr	Ile	Leu	Hindson et al., 1999	18425
IITGLTIL	ITGL	7648	4.83			Developmentally-regulated GTP-binding protein 1	P32233	1-367	peptide-Glu211+Tyr-peptide	N	MS	Ile	Leu	Ala	Glu	Tyr	Lys	Ile	His	auf dem Keller et al., 2010
IKCVAFDG	KCVA	107348	0			proteasome subunit alpha type-5	P28066	193-208	AIKSS+LIILKQVMEE	N	MS	Ile	Lys	Ser	Ser	Leu	Ile	Ile	Leu	Schilling & Overall, 2008
IKNSLTSK	KNSL	57549	0.08			galectin-1	P09382	2-135	peptide-Val132+Ala-peptide	P		Ile	Lys	Cys	Val	Ala	Phe	Asp	Gly	Dean & Overall, 2007	20294
-IKNYIQG	IKNY	4506	11.08			putative uncharacterized protein HSPD1	Q53QD5	16-34	ISS+IQSIVPALEIANAHR	N	MS	-	Ile	Ser	Ser	Ile	Gln	Ser	Ile	Schilling & Overall, 2008
IKSSLIIL	KSSL	5424	8.82			Proteasomal ubiquitin receptor ADRM1	Q9JKV1	2-407	peptide-Pro299+Ile-peptide	N	MS	Ile	Met	Ala	Pro	Ile	Leu	Ala	Asn	auf dem Keller et al., 2010
ILAEYKIH	LAEY	2670	16.37			actin, cytoplasmic 1	P60710	1-375	peptide-Ser348+Leu-peptide	N	MS	Ile	Leu	Ala	Ser	Leu	Ser	Thr	Phe	Kleifeld et al., 2010
ILASLSTF	LASL	252	31.2			calpain small subunit 1	P04632	60-84	peptide-Gly64+Val-peptide	N	MS	Ile	Leu	Gly	Gly	Val	Ile	Ser	Ala	Schilling & Overall, 2008
-ILDSVGI	ILDS	102547	0			39S ribosomal protein L12, mitochondrial precursor	P52815	148-166	IKN+YIQGINLVQAKKLVE	N	MS	-	Ile	Lys	Asn	Tyr	Ile	Gln	Gly	Schilling & Overall, 2008
ILGGVISA	LGGV	11339	2.08			S-methyl-5'-thioadenosine phosphorylase	Q9CQ65	2-283	peptide-Lys49+Ile-peptide	N	MS	Ile	Leu	Gly	Lys	Ile	Lys	Asn	Val	auf dem Keller et al., 2010
ILGKIKNV	LGKI	4636	10.76			Branched-chain-amino-acid aminotransferase, cytosolic	P24288	1-386	peptide-Lys368+Leu-peptide	N	MS	Ile	Leu	Gly	Lys	Leu	Thr	Asp	Ile	auf dem Keller et al., 2010
ILGKLTDI	LGKL	1099	23.88			60S ribosomal protein L12	P35979	1-165	peptide-Thr135+Ala-peptide	N	MS	Ile	Leu	Gly	Thr	Ala	Gln	Ser	Val	auf dem Keller et al., 2010
ILGTAQSV	LGTA	34928	0.24			synaptotagmin-14-like protein	Q58G82	21-65	peptide-Ser56+Leu-peptide	N	MS	Ile	Leu	Ile	Ser	Leu	Leu	Tyr	Asn	Schilling & Overall, 2008
ILISLLYN	LISL	13020	1.57			T-complex protein 1 subunit beta	P80314	2-535	peptide-Asn73+Ile-peptide	N	MS	Ile	Leu	Lys	Asn	Ile	Gly	Val	Asp	auf dem Keller et al., 2010
ILKNIGVD	LKNI	6366	6.88			Importin subunit beta-1	P70168	1-876	peptide-Ser64+Leu-peptide	N	MS	Ile	Lys	Asn	Ser	Leu	Thr	Ser	Lys	auf dem Keller et al., 2010
IMAPILAN	MAPI	2193	18.21			histone H2B type 1-H	Q93079	59-73	MGIMNS+FVNDIFER	N	MS	Ile	Met	Asn	Ser	Phe	Val	Asn	Asp	Schilling & Overall, 2008
IMNSFVND	MNSF	8981	3.45			histone H2B type 1-H	Q93079	59-73	M+GIMNSFVNDIFER	N	MS	-	-	-	Met	Gly	Ile	Met	Asn	Schilling & Overall, 2008
IMSKLAGE	MSKL	2813	15.84			collagen alpha-1(III) chain precursor	P08121	24-1464	peptide-Ser1235+Leu-peptide	N	MS	Ile	Met	Ser	Ser	Leu	Lys	Ser	Val	Kleifeld et al., 2010
IMSSLKSV	MSSL	609	27.45			leucine-rich repeat-containing protein 47	Q8N1G4	214-232	SEIPAE+LADCPKLKEINF	N	MS	Ile	Pro	Ala	Glu	Leu	Ala	Asp	Cys	Schilling & Overall, 2008
INENLIVN	NENL	41420	0.17			Moesin	P26041	2-577	peptide-Lys263+Ala-peptide	N	MS	Ile	Asp	Lys	Lys	Ala	Pro	Asp	Phe	auf dem Keller et al., 2010
INRALTAA	NRAL	2569	16.75			T-complex protein 1 subunit alpha	P17987	131-148	INEN+LIVNTDELGRDCL	N	MS	Ile	Asn	Glu	Asn	Leu	Ile	Val	Asn	Schilling & Overall, 2008
IPAELADC	PAEL	165	32.3			phosphoglycerate kinase 1 (EC 2.7.2.3)	P00558	297-323	peptide-Gly310+Trp-peptide	N	MS	Ile	Pro	Ala	Gly	Trp	Met	Gly	Leu	Schilling & Overall, 2008
IPAGWMGL	PAGW	166	32.3			Histidine triad nucleotide-binding protein 1	P70349	2-126	peptide-Lys30+Ile-peptide	N	MS	Ile	Pro	Ala	Lys	Ile	Ile	Phe	Glu	auf dem Keller et al., 2010
IPAKIIFE	PAKI	566	27.92			cDNA, FLJ92534, highly similar to Homo sapiens heat shock 60kDa protein 1	B2R5M6	466-486	IIKRTLKIPAM+TIAKNAGVE	N	MS	Ile	Pro	Ala	Met	Thr	Ile	Ala	Lys	Schilling & Overall, 2008
IPAMTIAK	PAMT	87989	0			glyceraldehyde-3-phosphate dehydrogenase	P04406	198-223	peptide-Ser210+Thr-peptide	N	MS	Ile	Pro	Ala	Ser	Thr	Gly	Ala	Ala	Schilling & Overall, 2008
IPASTGAA	PAST	18196	0.82			glyceraldehyde-3-phosphate dehydrogenase	P04406	200-215	GA+LQNIIPASTGAAK	N	MS	-	-	Gly	Ala	Leu	Gln	Asn	Ile	Schilling & Overall, 2008
IPCDFLIP	PCDF	134607	0			ATP-dependent RNA helicase DDX39	O00148	57-89	peptide-Ala78+Ile-peptide	N	MS	Ile	Pro	Gln	Ala	Ile	Leu	Gly	Met	Schilling & Overall, 2008
IPCNWKKQ	PCNW	107994	0			glucose-6-phosphate isomerase	P06744	400-417	MIPCD+FLIPVQTQHPIR	N	MS	Ile	Pro	Cys	Asp	Phe	Leu	Ile	Pro	Schilling & Overall, 2008
IPEKLEDL	PEKL	3343	14.3			Transaldolase	Q93092	1-337	peptide-Arg102+Val-peptide	N	MS	Ile	Pro	Gly	Arg	Val	Ser	Thr	Glu	auf dem Keller et al., 2010
IPENFFGV	PENF	2770	16			Aggrecan core protein	Q29011	1-537	peptide-Asn344+Phe-peptide	P	NT	Ile	Pro	Glu	Asn	Phe	Phe	Gly	Val	Fosang et al., 1993
IPFAVVGS	PFAV	4465	11.18			RNA-binding protein 12	Q9NTZ6	538-565	peptide-Ser554+Ile-peptide	N	MS	Ile	Pro	Phe	Ser	Ile	Thr	Lys	Met	Schilling & Overall, 2008
IPFSITKM	PFSI	2107	18.57			septin-2	Q15019	232-249	ASIPFS+VVGSNQLIEAK	N	MS	Ile	Pro	Phe	Ser	Val	Val	Gly	Ser	Schilling & Overall, 2008
IPFSVVGS	PFSV	17350	0.9			COP9 signalosome complex subunit 8 isoform 2	Q99627-2	1-160	KRIPPA+IKSANSELGGIW	N	MS	Ile	Pro	Pro	Ala	Ile	Lys	Ser	Ala	Schilling & Overall, 2008
IPGESRSQ	PGES	77128	0.04			Eukaryotic translation initiation factor 5B	Q05D44	1-1216	peptide-Met694+Leu-peptide	N	MS	Ile	Pro	Gly	Met	Leu	Ile	Ile	Asp	auf dem Keller et al., 2010
IPGFMCQG	PGFM	2377	17.45			probable ATP-dependent RNA helicase DDX47	Q9H0S4	53-69	AIPLA+LQGRDIIGLAE	N	MS	Ile	Pro	Leu	Ala	Leu	Gln	Gly	Arg	Schilling & Overall, 2008
IPGMLIID	PGML	262	31.03			Peptidyl-prolyl cis-trans isomerase A	P17742	2-164	peptide-Phe60+Met-peptide	N	MS	Ile	Pro	Gly	Phe	Met	Cys	Gln	Gly	auf dem Keller et al., 2010
IPGRVSTE	PGRV	18989	0.76			DSPP600	Q6YBV4	1-600	peptide-Glu344+Ser-peptide	P		Ile	Pro	Gly	Glu	Ser	Arg	Ser	Gln	Yamakoshi et al., 2006	20088
IPKAAKGT	PKAA	11573	2			Septin-9	Q80UG5	1-583	peptide-Ala496+Val-peptide	N	MS	Ile	Pro	Phe	Ala	Val	Val	Gly	Ser	Prudova et al., 2010
IPLALQGR	PLAL	28	34.49			ATP-binding cassette sub-family E member 1	P61221	174-193	QIPKA+AKGTVGSILDRKDE	N	MS	Ile	Pro	Lys	Ala	Ala	Lys	Gly	Thr	Schilling & Overall, 2008
IPPAIKSA	PPAI	3780	12.97			COP9 signalosome complex subunit 8	Q99627	57-75	KRIPPA+IKSANSELGGIW	N	MS	Ile	Pro	Pro	Ala	Ile	Lys	Ser	Ala	Schilling & Overall, 2008
IPQAILGM	PQAI	296	30.6			Putative uncharacterized protein	Q3UJB0	1-878	peptide-Ala255+Leu-peptide	N	MS	Ile	Pro	Gln	Ala	Leu	Glu	Lys	Ile	Prudova et al., 2010
IPQALEKI	PQAL	32	34.45			aggrecan core protein	P16112	17-2415	peptide-Asn360+Phe-peptide	P		Ile	Pro	Glu	Asn	Phe	Phe	Gly	Val	Fosang et al., 1992	18231
IPRALAEN	PRAL	13	35.23			Protein phosphatase 1 regulatory subunit 12A	Q9DBR7	1-1029	peptide-Arg504+Leu-peptide	N	MS	Ile	Pro	Arg	Arg	Leu	Ala	Ser	Thr	Prudova et al., 2010
IPRNTVVP	PRNT	10283	2.54			Pleiotrophin	P63089	33-168	peptide-Asn90+Trp-peptide	P	NT	Ile	Pro	Cys	Asn	Trp	Lys	Lys	Gln	Dean et al., 2007
IPRRLAST	PRRL	13203	1.52			78 kDa glucose-regulated protein precursor	P11021	427-467	peptide-Asn440+Thr-peptide	N	MS	Ile	Pro	Arg	Asn	Thr	Val	Val	Pro	Schilling & Overall, 2008
IPSCIAIK	PSCI	3751	13.05			Peroxidasin homolog	Q3UQ28	24-1475	peptide-Gln1130+Leu-peptide	N	MS	Ile	Pro	Ser	Gln	Leu	Leu	Asn	Thr	Prudova et al., 2010
IPSNYVAE	PSNY	149	32.5			Actin-related protein 3	Q99JY9	2-418	peptide-Cys34+Ile-peptide	N	MS	Ile	Pro	Ser	Cys	Ile	Ala	Ile	Lys	auf dem Keller et al., 2010
IPSQLLNT	PSQL	88	33.16			NEDD8-activating enzyme E1 regulatory subunit	Q8VBW6	1-534	peptide-Ser284+Ile-peptide	N	MS	Ile	Pro	Ser	Ser	Ile	Glu	Asp	Ile	auf dem Keller et al., 2010
IPSSIEDI	PSSI	188	32.06			T-complex protein 1 subunit delta	P50991	452-481	peptide-Thr464+Leu-peptide	N	MS	Ile	Pro	Ser	Thr	Leu	Ala	Glu	Asn	Schilling & Overall, 2008
IPSTLAEN	PSTL	334	30.18			Aldose 1-epimerase	Q8K157	1-342	peptide-Gly212+Val-peptide	N	MS	Ile	Pro	Thr	Gly	Val	Ile	Ala	Pro	auf dem Keller et al., 2010
IPTGVIAP	PTGV	3664	13.32			cytosolic non-specific dipeptidase	Q9D1A2	1-475	peptide-Thr421+Leu-peptide	N	MS	Ile	Pro	Val	Thr	Leu	Thr	Phe	Gln	Kleifeld et al., 2010
IPVTLTFQ	PVTL	1432	21.8			Zinc finger protein ZPR1	Q62384	1-459	peptide-Ala153+Ile-peptide	N	MS	Ile	Ser	Arg	Ala	Ile	Ser	Gly	Leu	auf dem Keller et al., 2010
-IQQLTAL	IQQL	2775	15.98			78 kDa glucose-regulated protein precursor	P11021	601-617	IEW+LESHQDADIEDFK	N	MS	-	Ile	Glu	Trp	Leu	Glu	Ser	His	Schilling & Overall, 2008
-IRELISN	IREL	2058	18.76			prefoldin subunit 5	Q99471	138-153	IQQ+LTALGAAQATAK	N	MS	-	Ile	Gln	Gln	Leu	Thr	Ala	Leu	Schilling & Overall, 2008
IRKDLYAN	RKDL	44390	0.15			ATP-dependent RNA helicase DDX19A	Q61655	2-478	peptide-Asn68+Leu-peptide	N	MS	Ile	Arg	Ser	Asn	Leu	Val	Asp	Asn	auf dem Keller et al., 2010
IRQDLGSP	RQDL	11385	2.06			actin, cytoplasmic 1	P60710	1-375	peptide-Asp292+Leu-peptide	N	MS	Ile	Arg	Lys	Asp	Leu	Tyr	Ala	Asn	Kleifeld et al., 2010
IRSNLVDN	RSNL	2127	18.47			Programmed cell death 6-interacting protein	Q9WU78-3	2-874	peptide-Ala312+Leu-peptide	N	MS	Ile	Asn	Arg	Ala	Leu	Thr	Ala	Ala	Prudova et al., 2010
ISFRGLFI	SFRG	11391	2.06			fibrillin-2	P35556	29-2911	peptide-Leu488+Thr-peptide	P		Ile	Thr	Gly	Leu	Thr	Ile	Leu	Asn	Hindson et al., 1999	18423
ISKKEMQP	SKKE	104660	0			Peroxiredoxin-1	P35700	1-199	peptide-Arg128+Gly-peptide	N	MS	Ile	Ser	Phe	Arg	Gly	Leu	Phe	Ile	auf dem Keller et al., 2010
ISRAISGL	SRAI	6432	6.74			14-3-3 protein zeta/delta	P63101	1-245	peptide-Lys158+Glu-peptide	N	MS	Ile	Ser	Lys	Lys	Glu	Met	Gln	Pro	auf dem Keller et al., 2010
-ISSIQSI	ISSI	1422	21.86			40S ribosomal protein S8	P62241	157-170	ISS+LLEEQFQQGK	N	MS	-	Ile	Ser	Ser	Leu	Leu	Glu	Glu	Schilling & Overall, 2008
-ISSLLEE	ISSL	375	29.71			multifunctional protein ADE2	P22234	59-74	ITS+CIFQLLQEAGIK	N	MS	-	Ile	Thr	Ser	Cys	Ile	Phe	Gln	Schilling & Overall, 2008
ITFIYVMP	TFIY	33665	0.26			Translationally-controlled tumor protein	P63028	1-172	peptide-Asp6+Leu-peptide	N	MS	Ile	Tyr	Arg	Asp	Leu	Ile	Ser	His	auf dem Keller et al., 2010
ITGLTILN	TGLT	34691	0.24			histone H1.2	P16403	43-59	ITKA+VAASKERSGVSL	N	MS	Ile	Thr	Lys	Ala	Val	Ala	Ala	Ser	Schilling & Overall, 2008
ITKAVAAS	TKAV	50261	0.12			histone H1.3	P16402	44-60	ITKA+VAASKERSGVSL	N	MS	Ile	Thr	Lys	Ala	Val	Ala	Ala	Ser	Schilling & Overall, 2008
-ITSCIFQ	ITSC	105817	0			sulfotransferase 1C4	O75897	37-55	IWN+FQAKPDDLLISTYPK	N	MS	-	Ile	Trp	Asn	Phe	Gln	Ala	Lys	Schilling & Overall, 2008
IVDCIISI	VDCI	136259	0			importin subunit beta-1	Q14974	762-793	peptide-Gly775+Leu-peptide	N	MS	Ile	Val	Gln	Gly	Leu	Lys	Gly	Asp	Schilling & Overall, 2008
IVEALNGK	VEAL	4638	10.76			glyceraldehyde-3-phosphate dehydrogenase	P04406	162-186	peptide-Gly173+Leu-peptide	N	MS	Ile	Val	Glu	Gly	Leu	Met	Thr	Thr	Schilling & Overall, 2008
IVEGLMTT	VEGL	4969	9.87			N-alpha-acetyltransferase 38, NatC auxiliary subunit	Q6ZWM4	1996-02-01	peptide-Thr26+Leu-peptide	N	MS	Ile	Val	Gly	Thr	Leu	Lys	Gly	Phe	auf dem Keller et al., 2010
IVGTLKGF	VGTL	1356	22.22			proteasome inhibitor PI31 subunit	Q92530	133-148	IVSG+IITPIHEQWEK	N	MS	Ile	Val	Ser	Gly	Ile	Ile	Thr	Pro	Schilling & Overall, 2008
IVNWLKKR	VNWL	1216	23.12			coatomer subunit gamma	Q9Y678	415-432	AIVDC+IISIIEENSESK	N	MS	Ile	Val	Asp	Cys	Ile	Ile	Ser	Ile	Schilling & Overall, 2008
IVQGLKGD	VQGL	1012	24.46			DJ-1 putative peptidase	Q99497	166-185	AIVEA+LNGKEVAAQVKAPL	N	MS	Ile	Val	Glu	Ala	Leu	Asn	Gly	Lys	Schilling & Overall, 2008
IVSGIITP	VSGI	1040	24.28			Rho GDP-dissociation inhibitor 1	Q99PT1	2-204	peptide-Gly125+Met-peptide	N	MS	Ile	Val	Ser	Gly	Met	Lys	Tyr	Ile	auf dem Keller et al., 2010
IVSGMKYI	VSGM	790	25.89			Sorting nexin-6	Q6P8X1	1-406	peptide-Gly202+Val-peptide	N	MS	Ile	Val	Ser	Gly	Val	Lys	Asp	Val	auf dem Keller et al., 2010
IVSGVKDV	VSGV	5400	8.88			protein disulfide-isomerase A3 precursor	P30101	122-142	GIVSH+LKKQAGPASVPLRTE	N	MS	Ile	Val	Ser	His	Leu	Lys	Lys	Gln	Schilling & Overall, 2008
IVSHLKKQ	VSHL	335	30.12			acetyl-CoA acetyltransferase, cytosolic	Q9BWD1	279-302	peptide-Trp283+Ser-peptide	N	MS	Ile	Val	Ser	Trp	Ser	Gln	Val	Gly	Schilling & Overall, 2008
IVSVCRAT	VSVC	41748	0.17			myelin basic protein isoform 1	P02686	135-304	peptide-Pro97+Arg-peptide	P	MS	Ile	Val	Thr	Pro	Arg	Thr	Pro	Pro	Shiryaev et al., 2009	25385
IVSWSQVG	VSWS	4144	12.04			phosphoribosylformylglycinamidine synthase (EC 6.3.5.3)	O15067	89-120	peptide-Val107+Cys-peptide	N	MS	Ile	Val	Ser	Val	Cys	Arg	Ala	Thr	Schilling & Overall, 2008
IVTPRTPP	VTPR	40652	0.18			fructose-bisphosphate aldolase C	P09972	100-122	peptide-Gly106+Ile-peptide	N	MS	Ile	Val	Val	Gly	Ile	Lys	Val	Asp	Schilling & Overall, 2008
IVVGIKVD	VVGI	4431	11.28			Parafibromin	Q8JZM7	2-531	peptide-Arg156+Leu-peptide	N	MS	Leu	Ala	Ala	Arg	Leu	Glu	Gly	His	auf dem Keller et al., 2010
-IWNFQAK	IWNF	27878	0.37			heterogeneous nuclear ribonucleoprotein H2	P55795	304-320	IYN+FFSPLNPMRVHIE	N	MS	-	Ile	Tyr	Asn	Phe	Phe	Ser	Pro	Schilling & Overall, 2008
-IYNFFSP	IYNF	14027	1.36			nestin	P48681	59-73	LAA+LRALVDQRWRE	N	MS	-	Leu	Ala	Ala	Leu	Arg	Ala	Leu	Schilling & Overall, 2008
IYQNIQDG	YQNI	7123	5.54			protein disulfide-isomerase precursor	P07237	124-147	peptide-Trp128+Leu-peptide	N	MS	Ile	Val	Asn	Trp	Leu	Lys	Lys	Arg	Schilling & Overall, 2008
IYRDLISH	YRDL	36828	0.22			ras-related protein Rab-14	P61106	171-201	peptide-Asn175+Ile-peptide	N	MS	Ile	Tyr	Gln	Asn	Ile	Gln	Asp	Gly	Schilling & Overall, 2008
KAAAFLGD	AAAF	1677	20.52			Amyloid-like protein 2	Q06335	30-695	peptide-Gln468+Met-peptide	N	MS	Lys	Ala	Ala	Gln	Met	Lys	Ser	Gln	auf dem Keller et al., 2010
KAAQMKSQ	AAQM	8140	4.24			endoplasmin	P08113	22-802	peptide-Ala666+Tyr-peptide	N	MS	Lys	Ala	Gln	Ala	Tyr	Gln	Thr	Gly	Kleifeld et al., 2010
KAFQVWSD	AFQV	105758	0			Tumor protein D52	P55327	142-166	peptide-Ala152+Ala-peptide	N	MS	Lys	Ala	Ser	Ala	Ala	Phe	Ser	Ser	Schilling & Overall, 2008
KAFRWLHN	AFRW	50215	0.12			Macrophage metalloelastase	P34960	110-473	peptide-Gln143+Val-peptide	N	MS	Lys	Ala	Phe	Gln	Val	Trp	Ser	Asp	auf dem Keller et al., 2010
KAGEIHVK	AGEI	123322	0			Protein phosphatase 1G	Q61074	1-542	peptide-Asp358+Met-peptide	N	MS	Lys	Ala	Leu	Asp	Met	Ser	Tyr	Asp	auf dem Keller et al., 2010
KAGNLGGG	AGNL	1927	19.35			Zinc finger CCCH domain-containing protein 11A	Q6NZF1	1-792	peptide-Glu331+Ile-peptide	N	MS	Lys	Ala	Gly	Glu	Ile	His	Val	Lys	auf dem Keller et al., 2010
KAKGILFV	AKGI	4166	12			heterogeneous nuclear ribonucleoprotein AB isoform a variant	Q53F64	136-164	peptide-Ala147+Met-peptide	N	MS	Lys	Ala	Met	Ala	Met	Lys	Lys	Asp	Schilling & Overall, 2008
KALDMSYD	ALDM	33088	0.27			Nucleolin	P09405	2-707	peptide-Glu367+Leu-peptide	N	MS	Lys	Ala	Leu	Glu	Leu	Thr	Gly	Leu	auf dem Keller et al., 2010
KALELTGL	ALEL	20695	0.64			6-phosphogluconate dehydrogenase, decarboxylating	Q9DCD0	2-483	peptide-Gly120+Ile-peptide	N	MS	Lys	Ala	Lys	Gly	Ile	Leu	Phe	Val	auf dem Keller et al., 2010
KAMAMKKD	AMAM	3401	14.07			heterogeneous nuclear ribonucleoprotein A/B	Q99020	1-285	peptide-Ala152+Met-peptide	N	MS	Lys	Ala	Met	Ala	Met	Lys	Lys	Asp	Kleifeld et al., 2010
KAQAYQTG	AQAY	3465	13.88			Moesin	P26041	2-577	peptide-Met451+Val-peptide	N	MS	Lys	Ala	Gln	Met	Val	Gln	Glu	Asp	auf dem Keller et al., 2010
KAQMVQED	AQMV	25317	0.44			60S ribosomal protein L22	P67984	2-128	peptide-Asn55+Leu-peptide	N	MS	Lys	Ala	Gly	Asn	Leu	Gly	Gly	Gly	auf dem Keller et al., 2010
KASAAFSS	ASAA	50021	0.12			Tumor protein D52 isoform 3	P55327-3	165-190	peptide-Ala176+Ala-peptide	N	MS	Lys	Ala	Ser	Ala	Ala	Phe	Ser	Ser	Schilling & Overall, 2008
KASGYQSS	ASGY	2738	16.13			Glutathione synthetase	P51855	2-474	peptide-Glu197+Leu-peptide	N	MS	Lys	Ala	Trp	Glu	Leu	Tyr	Gly	Ser	auf dem Keller et al., 2010
-KASIKKG	KASI	11078	2.17			integrin alpha-E precursor	P38570	590-602	KLT+DVAIGAPLE	N	MS	-	Lys	Leu	Thr	Asp	Val	Ala	Ile	Schilling & Overall, 2008
KAVATVGP	AVAT	23923	0.49			Transketolase	P40142	1-623	peptide-Glu459+Leu-peptide	N	MS	Lys	Ala	Val	Glu	Leu	Ala	Ala	Asn	auf dem Keller et al., 2010
KAVELAAN	AVEL	14106	1.34			Fructose-bisphosphate aldolase A	P05064	2-364	peptide-Gln45+Ser-peptide	N	MS	Lys	Arg	Leu	Gln	Ser	Ile	Gly	Thr	auf dem Keller et al., 2010
KAWELYGS	AWEL	30831	0.3			cathepsin L1	P06797	114-334	peptide-Ala240+Thr-peptide	N	MS	Lys	Ala	Val	Ala	Thr	Val	Gly	Pro	Kleifeld et al., 2010
KCAQIEAK	CAQI	39969	0.18			T-complex protein 1 subunit zeta	P80317	2-531	peptide-Asp107+Leu-peptide	N	MS	Lys	Gln	Ala	Asp	Leu	Tyr	Ile	Ser	auf dem Keller et al., 2010
KDLGATWV	DLGA	35099	0.24			Nucleosome assembly protein 1-like 1	P28656	2-388	peptide-Gln90+Ile-peptide	N	MS	Lys	Cys	Ala	Gln	Ile	Glu	Ala	Lys	auf dem Keller et al., 2010
KENLKAAQ	ENLK	48948	0.12			myelin basic protein isoform 1	P02686	135-304	peptide-Gly109+Leu-peptide	P	MS	Lys	Gly	Arg	Gly	Leu	Ser	Leu	Ser	Shiryaev et al., 2009	25388
--KEQISD	-KEQ					histone H1.2	P16403	84-105	peptide-Ser86+Leu-peptide	N	MS	-	-	Lys	Ser	Leu	Val	Ser	Lys	Schilling & Overall, 2008
KFEELNMD	FEEL	137346	0			Heterogeneous nuclear ribonucleoprotein A/B	Q99020	1-285	peptide-Glu100+Val-peptide	N	MS	Lys	Phe	Gly	Glu	Val	Val	Asp	Cys	auf dem Keller et al., 2010
KFGEVVDC	FGEV	81961	0			talin-1	Q9Y490	1895-1917	peptide-Ala1904+Val-peptide	N	MS	Lys	Pro	Ala	Ala	Val	Ala	Ala	Glu	Schilling & Overall, 2008
KGGNLRDK	GGNL	5339	9.02			Spliceosome RNA helicase Bat1	Q9Z1N5	2-428	peptide-Ala387+Ile-peptide	N	MS	Lys	Gly	Leu	Ala	Ile	Thr	Phe	Val	auf dem Keller et al., 2010
KGKNIKII	GKNI	71425	0.05			Twinfilin-1	Q91YR1	2-350	peptide-Thr174+Lys-peptide	N	MS	Lys	His	Gln	Thr	Leu	Gln	Gly	Val	auf dem Keller et al., 2010
KGLAITFV	GLAI	34193	0.25			Pyruvate kinase isozymes M1/M2	P52480	2-531	peptide-Asn264+Ile-peptide	N	MS	Lys	Gly	Lys	Asn	Ile	Lys	Ile	Ile	auf dem Keller et al., 2010
KGRGLSLS	GRGL	7536	4.98			leucine-rich repeat-containing protein 59	Q96AG4	2020-01-19	TKAGSKGGN+LRDKLDGNE	N	MS	Lys	Gly	Gly	Asn	Leu	Arg	Asp	Lys	Schilling & Overall, 2008
KHQTLQGV	HQTL	13713	1.42			Heat shock protein HSP 90-alpha	P07901	2-733	peptide-Gln212+Phe-peptide	N	MS	Lys	His	Ser	Gln	Phe	Ile	Gly	Tyr	auf dem Keller et al., 2010
KHSQFIGY	HSQF	26897	0.39			heat shock protein HSP 90-beta	P11499	2-724	peptide-Gln207+Phe-peptide	N	MS	Lys	His	Ser	Gln	Phe	Ile	Gly	Tyr	Kleifeld et al., 2010
KHWPFMVV	HWPF	64334	0.06			protein disulfide-isomerase A4 precursor	P13667	101-128	peptide-Asn106+Ile-peptide	N	MS	Lys	Ile	Ala	Asn	Ile	Leu	Lys	Asp	Schilling & Overall, 2008
KIALLQSL	IALL	2673	16.36			Heterogeneous nuclear ribonucleoprotein A/B	Q99020	1-285	peptide-Glu177+Tyr-peptide	N	MS	Lys	Ile	Arg	Glu	Tyr	Phe	Gly	Gln	auf dem Keller et al., 2010
KIANILKD	IANI	474	28.68			Protein Hook homolog 3	Q8BUK6	1-718	peptide-Leu491+Leu-peptide	N	MS	Lys	Ile	Ala	Leu	Leu	Gln	Ser	Leu	auf dem Keller et al., 2010
KIGCLLKF	IGCL	3766	13.01			ATP-dependent RNA helicase DDX18	Q9NVP1	555-573	SKISD+IQSQLEKLIEKNY	N	MS	Lys	Ile	Ser	Asp	Ile	Gln	Ser	Gln	Schilling & Overall, 2008
KIQALQQQ	IQAL	732	26.32			STIP1 protein	Q3ZCU9	567-590	peptide-Lys580+Leu-peptide	N	MS	Lys	Ile	Gln	Lys	Leu	Met	Asp	Val	Schilling & Overall, 2008
KIQKLMDV	IQKL	3650	13.35			stress-induced-phosphoprotein 1	Q5TZU9	520-543	peptide-Lys533+Leu-peptide	N	MS	Lys	Ile	Gln	Lys	Leu	Met	Asp	Val	Schilling & Overall, 2008
KIREYFGQ	IREY	6387	6.84			vigilin	Q00341	59-86	peptide-Pro70+Ile-peptide	N	MS	Lys	Ile	Arg	Pro	Ile	Lys	Ala	Ser	Schilling & Overall, 2008
KIRPIKAS	IRPI	2884	15.59			Tropomyosin alpha-4 chain	Q6IRU2	2-248	peptide-Ala16+Leu-peptide	N	MS	Lys	Ile	Gln	Ala	Leu	Gln	Gln	Gln	auf dem Keller et al., 2010
KISDIQSQ	ISDI	7380	5.19			Heat shock 70 kDa protein 4	Q61316	1-841	peptide-Lys356+Phe-peptide	N	MS	Lys	Ile	Ser	Lys	Phe	Phe	Gly	Lys	auf dem Keller et al., 2010
KISKFFGK	ISKF	8775	3.62			60 kDa heat shock protein, mitochondrial	P63038	27-573	peptide-Ser253+Val-peptide	N	MS	Lys	Ile	Ser	Ser	Val	Gln	Ser	Ile	Prudova et al., 2010
KISSVQSI	ISSV	7765	4.71			phosphoglycerate mutase 1	Q9DBJ1	2-254	peptide-Arg116+Arg-peptide	N	MS	Lys	Ile	Trp	Arg	Arg	Ser	Tyr	Asp	Kleifeld et al., 2010
KIWRRSYD	IWRR	107433	0			Pigment epithelium-derived factor	P97298	20-417	peptide-Ala55+Ala-peptide	N	MS	Lys	Leu	Ala	Ala	Ala	Val	Ser	Asn	auf dem Keller et al., 2010
KKAAIISA	KAAI	10706	2.34			ATP-citrate synthase	P53396	609-634	peptide-Asp614+Gln-peptide	N	MS	Lys	Lys	Ala	Asp	Gln	Lys	Gly	Val	Schilling & Overall, 2008
KKADQKGV	KADQ	27795	0.37			Fructose-bisphosphate aldolase A	P05064	2-364	peptide-Asn320+Leu-peptide	N	MS	Lys	Lys	Glu	Asn	Leu	Lys	Ala	Ala	auf dem Keller et al., 2010
KKENLKAA	KENL	42337	0.16			U2-associated protein SR140	Q6NV83	1-1029	peptide-Asn203+Leu-peptide	N	MS	Lys	Lys	Ser	Asn	Leu	Glu	Leu	Phe	auf dem Keller et al., 2010
KKSNLELF	KSNL	1644	20.71			Lupus La protein homolog	P32067	1-415	peptide-Cys231+Leu-peptide	N	MS	Lys	Met	Gly	Cys	Leu	Leu	Lys	Phe	auf dem Keller et al., 2010
KLAAAVSN	LAAA	4447	11.23			mannose-binding protein A	P19999	18-238	peptide-Asn97+Met-peptide	P		Lys	Leu	Ala	Asn	Met	Glu	Ala	Glu	Butler et al., 2002	18568
KLAELKSL	LAEL	646	27.08			T-complex protein 1 subunit alpha	P11983	1-556	peptide-Ala469+Phe-peptide	N	MS	Lys	Leu	Arg	Ala	Phe	His	Asn	Glu	auf dem Keller et al., 2010
KLANMEAE	LANM	236	31.41			Heat shock 70 kDa protein 4	Q61316	1-841	peptide-Glu678+Leu-peptide	N	MS	Lys	Leu	Ala	Glu	Leu	Lys	Ser	Leu	Prudova et al., 2010
KLGDVYVN	LGDV	110686	0			Phosphoglycerate kinase 2	P09041	2-417	peptide-Asp159+Val-peptide	N	MS	Lys	Leu	Gly	Asp	Val	Tyr	Val	Asn	auf dem Keller et al., 2010
KLGELSDK	LGEL	399	29.44			high mobility group protein B2	P30681	2-210	peptide-Glu131+Met-peptide	N	MS	Lys	Leu	Gly	Glu	Met	Trp	Ser	Glu	Kleifeld et al., 2010
KLGEMWSE	LGEM	1088	23.98			ADP-ribose pyrophosphatase, mitochondrial	Q8BVU5	47-350	peptide-Ala255+Leu-peptide	N	MS	Lys	Leu	His	Ala	Leu	Phe	Ser	Gln	auf dem Keller et al., 2010
KLHALFSQ	LHAL	1598	20.89			Nuclear pore complex-associated intranuclear coiled-coil protein TPR	Q7M739	2357-01-01	peptide-Asn287+Leu-peptide	N	MS	Lys	Leu	Ser	Asn	Leu	Tyr	Lys	Ser	auf dem Keller et al., 2010
KLNVCVSK	LNVC	69629	0.05			T-complex protein 1 subunit gamma	P80318	1-545	peptide-Thr505+Tyr-peptide	N	MS	Lys	Leu	Gln	Thr	Tyr	Lys	Thr	Ala	auf dem Keller et al., 2010
KLQTYKTA	LQTY	20911	0.63			T-complex protein 1 subunit gamma isoform 2	P49368-2	454-473	LGIWEPLA+VKLQTYKTAVE	N	MS	Glu	Pro	Leu	Ala	Val	Lys	Leu	Gln	Schilling & Overall, 2008
KLRAFHNE	LRAF	4103	12.15			heterogeneous nuclear ribonucleoprotein L	P14866	434-468	peptide-Val420+Cys-peptide	N	MS	Lys	Leu	Asn	Val	Cys	Val	Ser	Lys	Schilling & Overall, 2008
KLSGVSVS	LSGV	11447	2.04			Phosphatidylethanolamine-binding protein 1	P70296	2-187	peptide-Thr65+Leu-peptide	N	MS	Lys	Leu	Tyr	Thr	Leu	Val	Leu	Thr	auf dem Keller et al., 2010
KLSNLYKS	LSNL	148	32.5			Bifunctional purine biosynthesis protein PURH	Q9CWJ9	1-592	peptide-Gly533+Val-peptide	N	MS	Lys	Leu	Ser	Gly	Val	Ser	Val	Ser	auf dem Keller et al., 2010
-KLTDVAI	KLTD	100539	0			lamina-associated polypeptide 2 isoform alpha	P42166	16-37	peptide-Glu19+Leu-peptide	N	MS	-	Lys	Ser	Glu	Leu	Val	Ala	Asn	Schilling & Overall, 2008
KLYTLVLT	LYTL	86495	0			prohibitin	P35232	198-223	peptide-Ala210+Ile-peptide	N	MS	Lys	Lys	Ala	Ala	Ile	Ile	Ser	Ala	Schilling & Overall, 2008
KMGCLLKF	MGCL	7077	5.61			High mobility group protein B2	P30681	2-210	peptide-Ser15+Tyr-peptide	N	MS	Lys	Met	Ser	Ser	Tyr	Ala	Phe	Phe	auf dem Keller et al., 2010
KMSSYAFF	MSSY	1369	22.11			High mobility group protein B1	P63158	2-215	peptide-Ser15+Tyr-peptide	N	MS	Lys	Met	Ser	Ser	Tyr	Ala	Phe	Phe	auf dem Keller et al., 2010
KNGRVEII	NGRV	39247	0.19			72 kDa type IV collagenase	P08253	110-660	peptide-Lys579+Thr-peptide	P	MS	Lys	Asn	Lys	Lys	Thr	Tyr	Ile	Phe	auf dem Keller et al., 2010
KNKKTYIF	NKKT	125006	0			malate dehydrogenase, mitochondrial precursor	P40926	1972-01-01	peptide-Pro48+Leu-peptide	N	MS	Lys	Asn	Ser	Pro	Leu	Val	Ser	Arg	Schilling & Overall, 2008
KNQALKEA	NQAL	5806	8.03			78 kDa glucose-regulated protein	P20029	20-655	peptide-Arg50+Val-peptide	N	MS	Lys	Asn	Gly	Arg	Val	Glu	Ile	Ile	auf dem Keller et al., 2010
KNSPLVSR	NSPL	3655	13.33			Triosephosphate isomerase	P17751	2-299	peptide-Gly88+Ala-peptide	N	MS	Lys	Asp	Leu	Gly	Ala	Thr	Trp	Val	Prudova et al., 2010
KPAAVAAE	PAAV	288	30.72			chloride intracellular channel protein 4	Q9Y696	61-85	peptide-Asp65+Leu-peptide	N	MS	Lys	Pro	Ala	Asp	Leu	Gln	Asn	Leu	Schilling & Overall, 2008
KPADLQNL	PADL	347	30.02			Proline synthase co-transcribed bacterial homolog protein	Q9Z2Y8	1-274	peptide-Asp52+Met-peptide	N	MS	Lys	Pro	Ala	Asp	Met	Val	Ile	Glu	auf dem Keller et al., 2010
KPADMVIE	PADM	1089	23.96			macrophage migration inhibitory factor	P34884	2-115	peptide-Gln36+Tyr-peptide	N	MS	Lys	Pro	Ala	Gln	Tyr	Ile	Ala	Val	Kleifeld et al., 2010
KPAEATAG	PAEA	42838	0.16			Filamin-A	Q8BTM8	2647-02-01	peptide-Glu694+Phe-peptide	N	MS	Lys	Pro	Ala	Glu	Phe	Thr	Val	Asp	Prudova et al., 2010
KPAEFTVD	PAEF	1906	19.47			ATP-citrate synthase	P53396	835-848	KPAS+FMTSICDER	N	MS	Lys	Pro	Ala	Ser	Phe	Met	Thr	Ser	Schilling & Overall, 2008
KPAQYIAV	PAQY	851	25.37			heterogeneous nuclear ribonucleoprotein U-like protein 2	Q1KMD3	62-151	peptide-Glu133+Ala-peptide	N	MS	Lys	Pro	Ala	Glu	Ala	Thr	Ala	Gly	Schilling & Overall, 2008
KPASFMTS	PASF	264	31.01			kinesin-1 heavy chain	P33176	394-418	peptide-Thr405+Ala-peptide	N	MS	Lys	Pro	Ala	Thr	Ala	Ile	Gly	Val	Schilling & Overall, 2008
KPATAIGV	PATA	34147	0.25			Zinc finger transcription factor ZNF207	Q9JMD0	1-495	peptide-Thr370+Leu-peptide	N	MS	Lys	Pro	Ala	Thr	Leu	Thr	Thr	Thr	Prudova et al., 2010
KPATLTTT	PATL	138	32.62			Ser-Gly-Ala-Lys-Pro-Arg-Ala-Leu-Thr-Ala			Ser-Gly-Ala-Lys-Pro-Arg-Ala+Leu-Thr-Ala	N		Lys	Pro	Arg	Ala	Leu	Thr	Ala	-	Murphy, 2004
KPDKLQQA	PDKL	27126	0.39			Fermitin family homolog 2	Q8CIB5	1-574	peptide-Ala241+Leu-peptide	N	MS	Lys	Pro	Gln	Ala	Leu	Leu	Asp	Lys	Prudova et al., 2010
KPEGLHQL	PEGL	393	29.5			inosine triphosphate pyrophosphatase	Q9BY32	94-110	LKPEG+LHQLLAGFEDK	N	MS	Lys	Pro	Glu	Gly	Leu	His	Gln	Leu	Schilling & Overall, 2008
KPENEFAF	PENE	152654	0			Inorganic pyrophosphatase	Q15181	195-211	VPDGKPEN+EFAFNAEFK	N	MS	Lys	Pro	Glu	Asn	Glu	Phe	Ala	Phe	Schilling & Overall, 2008
KPENILVD	PENI	2829	15.8			Inosine triphosphate pyrophosphatase isoform 2	Q9BY32-2	77-93	LKPEG+LHQLLAGFEDK	N	MS	Lys	Pro	Glu	Gly	Leu	His	Gln	Leu	Schilling & Overall, 2008
KPFGLKVS	PFGL	211	31.71			Peptidyl-prolyl cis-trans isomerase FKBP1A	P26883	2-108	peptide-Lys48+Phe-peptide	N	MS	Lys	Pro	Phe	Lys	Phe	Thr	Leu	Gly	auf dem Keller et al., 2010
KPFKFTLG	PFKF	25143	0.45			Alcohol dehydrogenase 1	P00329	2-375	peptide-Thr23+Ile-peptide	N	MS	Lys	Pro	Phe	Thr	Ile	Glu	Asp	Ile	auf dem Keller et al., 2010
KPFTIEDI	PFTI	12056	1.83			rho GDP-dissociation inhibitor 1	P52565	27-48	peptide-Ala31+Gln-peptide	N	MS	Lys	Pro	Pro	Ala	Gln	Lys	Ser	Ile	Schilling & Overall, 2008
KPGAHVTV	PGAH	15119	1.18			C-1-tetrahydrofolate synthase, cytoplasmic	P11586	223-245	peptide-Ala231+Ile-peptide	N	MS	Lys	Pro	Gly	Ala	Ile	Val	Ile	Asp	Schilling & Overall, 2008
KPGAIVID	PGAI	405	29.32			galectin-1	P09382	2-135	peptide-Glu16+Cys-peptide	P		Lys	Pro	Gly	Glu	Cys	Leu	Arg	Val	Dean & Overall, 2007	20293
KPGECLRV	PGEC	42940	0.16			inorganic pyrophosphatase	Q15181	177-191	LKPGY+LEATVDWFR	N	MS	Lys	Pro	Gly	Tyr	Leu	Glu	Ala	Thr	Schilling & Overall, 2008
KPGYLEAT	PGYL	689	26.72			Inorganic pyrophosphatase	Q15181	178-191	LKPGY+LEATVDWFR	N	MS	Lys	Pro	Gly	Tyr	Leu	Glu	Ala	Thr	Schilling & Overall, 2008
KPHTLAGQ	PHTL	2130	18.47			Moesin	P26041	2-577	peptide-Asp261+Lys-peptide	N	MS	Lys	Pro	Ile	Asp	Lys	Lys	Ala	Pro	auf dem Keller et al., 2010
KPIDKKAP	PIDK	140518	0			Radixin	P26043	1-583	peptide-Asp261+Lys-peptide	N	MS	Lys	Pro	Ile	Asp	Lys	Lys	Ala	Pro	auf dem Keller et al., 2010
KPIDYTVL	PIDY	5591	8.49			BXDC2 protein	A0JLQ5	295-326	peptide-Glu317+Ile-peptide	N	MS	Lys	Pro	Ile	Glu	Ile	Gln	Trp	Val	Schilling & Overall, 2008
KPIEIQWV	PIEI	6140	7.37			cDNA FLJ76585, highly similar to Homo sapiens brix domain containing 2	A8K0P5	295-326	peptide-Glu317+Ile-peptide	N	MS	Lys	Pro	Ile	Glu	Ile	Gln	Trp	Val	Schilling & Overall, 2008
KPKPQAES	PKPQ	2971	15.31			eukaryotic peptide chain release factor GTP-binding subunit ERF3A	P15170	56-73	IPKPKS+VVAPPGAPKKE	N	MS	Lys	Pro	Lys	Ser	Val	Val	Ala	Pro	Schilling & Overall, 2008
KPKSVVAP	PKSV	5461	8.75			26S proteasome non-ATPase regulatory subunit 2	Q13200	851-878	peptide-Thr861+Ile-peptide	N	MS	Lys	Pro	Lys	Thr	Ile	Thr	Gly	Phe	Schilling & Overall, 2008
KPKTITGF	PKTI	5292	9.13			P67	Q13041	533-560	peptide-Thr543+Ile-peptide	N	MS	Lys	Pro	Lys	Thr	Ile	Thr	Gly	Phe	Schilling & Overall, 2008
KPLAHHIP	PLAH	667	26.91			insulin-like growth factor-binding protein 4	P47879	21-254	peptide-Arg91+Thr-peptide	N	MS	Lys	Pro	Leu	Arg	Thr	Leu	Met	His	Kleifeld et al., 2010
KPLGLTAR	PLGL	9	35.35			Mca-Pro-Leu-Gly-Leu-Dpa-Ala-Arg-NH2			Mca-Pro-Leu-Gly+Leu-Dpa-Ala-Arg-NH2	S		Mca	Pro	Leu	Gly	Leu	Dpa	Ala	Arg	Knight et al., 1992
KPLPEVTD	PLPE	103690	0			Peptidyl-prolyl cis-trans isomerase FKBP3	Q62446	2-224	peptide-Ser163+Phe-peptide	N	MS	Lys	Pro	Leu	Ser	Phe	Lys	Val	Gly	auf dem Keller et al., 2010
KPLRTLMH	PLRT	33244	0.26			lupus La protein	P05455	91-109	SPSKPLP+EVTDEYKNDVK	N	MS	Lys	Pro	Leu	Pro	Glu	Val	Thr	Asp	Schilling & Overall, 2008
KPLSFKVG	PLSF	943	24.86			microtubule-associated protein RP/EB family member 1	Q15691	150-168	KPLT+SSSAAPQRPISTQR	N	MS	Lys	Pro	Leu	Thr	Ser	Ser	Ser	Ala	Schilling & Overall, 2008
KPLTSSSA	PLTS	13184	1.53			DNA-(apurinic or apyrimidinic site) lyase	P27695	202-221	KPLV+LCGDLNVAHEEIDLR	N	MS	Lys	Pro	Leu	Val	Leu	Cys	Gly	Asp	Schilling & Overall, 2008
KPLVLCGD	PLVL	9171	3.29			DNA-(apurinic or apyrimidinic site) lyase	P27695	202-221	KPLVLCGD+LNVAHEEIDLR	N	MS	Leu	Cys	Gly	Asp	Leu	Asn	Val	Ala	Schilling & Overall, 2008
KPMQFLGD	PMQF	7522	5			microtubule-associated protein	Q86Y04	443-459	KPMS+LASGLVPAAPPK	N	MS	Lys	Pro	Met	Ser	Leu	Ala	Ser	Gly	Schilling & Overall, 2008
KPMSLASG	PMSL	151	32.49			fatty acid synthase	P49327	525-543	AVKPFG+LKVSQLLLSTDE	N	MS	Lys	Pro	Phe	Gly	Leu	Lys	Val	Ser	Schilling & Overall, 2008
KPPAQKSI	PPAQ	44511	0.15			rho GDP-dissociation inhibitor 1	Q99PT1	2-204	peptide-Ala31+Gln-peptide	N	MS	Lys	Pro	Pro	Ala	Gln	Lys	Ser	Ile	Kleifeld et al., 2010
KPPRLVGG	PPRL	4532	11.01			Ribosomal protein S6 kinase alpha-1 isoform 2	Q15418-2	1-744	DLKPSN+ILYVDESGNPECLR	N	MS	Lys	Pro	Ser	Asn	Ile	Leu	Tyr	Val	Schilling & Overall, 2008
KPQALLDK	PQAL	32	34.45			glycogen synthase kinase-3 alpha	P49840	243-260	DIKPQN+LLVDPDTAVLK	N	MS	Lys	Pro	Gln	Asn	Leu	Leu	Val	Asp	Schilling & Overall, 2008
KPQNLLVD	PQNL	127	32.79			methionyl-tRNA synthetase, cytoplasmic	P56192	827-851	peptide-Gln841+Ile-peptide	N	MS	Lys	Pro	Gln	Gln	Ile	Gln	Ala	Leu	Schilling & Overall, 2008
KPQQIQAL	PQQI	3128	14.86			peroxisomal multifunctional enzyme type 2	P51659	275-301	peptide-Ser287+Ile-peptide	N	MS	Lys	Pro	Gln	Ser	Ile	Gln	Glu	Ser	Schilling & Overall, 2008
KPQSIQES	PQSI	545	28.07			inorganic pyrophosphatase	Q15181	194-211	VPDGKPEN+EFAFNAEFK	N	MS	Lys	Pro	Glu	Asn	Glu	Phe	Ala	Phe	Schilling & Overall, 2008
KPRALTA-	PRAL	13	35.23			T-complex protein 1 subunit alpha	P17987	490-514	peptide-Asp497+Asn-peptide	N	MS	Lys	Pro	Arg	Asp	Asn	Lys	Gln	Ala	Schilling & Overall, 2008
KPRDNKQA	PRDN	47913	0.13			High mobility group protein B1	P63158	2-215	peptide-Gly11+Lys-peptide	N	MS	Lys	Pro	Arg	Gly	Lys	Met	Ser	Ser	auf dem Keller et al., 2010
KPRFISVG	PRFI	1336	22.33			Sorting nexin-1	Q9WV80	1-522	peptide-Lys445+Leu-peptide	N	MS	Lys	Pro	Asp	Lys	Leu	Gln	Gln	Ala	auf dem Keller et al., 2010
KPRGKMSS	PRGK	10644	2.37			High mobility group protein B2	P30681	2-210	peptide-Gly11+Lys-peptide	N	MS	Lys	Pro	Arg	Gly	Lys	Met	Ser	Ser	auf dem Keller et al., 2010
KPSEIEVG	PSEI	1282	22.66			Filamin-A	Q8BTM8	2647-02-01	peptide-Lys1069+Val-peptide	N	MS	Lys	Pro	Ser	Lys	Val	Lys	Ala	Phe	Prudova et al., 2010
KPSKVKAF	PSKV	7474	5.06			putative uncharacterized protein	Q3U7N9	1-1061	peptide-Lys987+Val-peptide	N	MS	Lys	Pro	Ser	Lys	Val	Lys	Ala	Phe	Kleifeld et al., 2010
KPSNILYV	PSNI	104	32.95			ribosomal protein S6 kinase alpha-1	Q15418	1-735	DLKPSN+ILYVDESGNPECLR	N	MS	Lys	Pro	Ser	Asn	Ile	Leu	Tyr	Val	Schilling & Overall, 2008
KPSNLLIN	PSNL	1	36.52			Fibronectin	P11276	33-2477	peptide-Gln1637+Met-peptide	N	MS	Lys	Pro	Ser	Gln	Met	Gln	Val	Thr	auf dem Keller et al., 2010
KPSPLTLA	PSPL	10	35.35			NAD-dependent malic enzyme, mitochondrial precursor	P23368	384-399	KPST+IIGVAGAGRLF	N	MS	Lys	Pro	Ser	Thr	Ile	Ile	Gly	Val	Schilling & Overall, 2008
KPSQMQVT	PSQM	630	27.24			fibronectin	P02751	32-2386	peptide-Gln1547+Met-peptide	P	MS	Lys	Pro	Ser	Gln	Met	Gln	Val	Thr	Doucet & Overall, 2010
KPSTIIGV	PSTI	1496	21.41			Ras-related C3 botulinum toxin substrate 1	P63001	1-189	peptide-Asn52+Leu-peptide	N	MS	Lys	Pro	Val	Asn	Leu	Gly	Leu	Trp	auf dem Keller et al., 2010
KPVGHVDI	PVGH	1158	23.49			cDNA, FLJ92232, highly similar to Homo sapiens barrier to autointegration factor 1	B2R4V4	1932-08-01	peptide-Gly21+Ser-peptide	N	MS	Lys	Pro	Val	Gly	Ser	Leu	Ala	Gly	Schilling & Overall, 2008
KPVGSLAG	PVGS	5552	8.57			pyruvate kinase	Q504U3	154-171	AGKPVI+CATQMLESMIK	N	MS	Lys	Pro	Val	Ile	Cys	Ala	Thr	Gln	Schilling & Overall, 2008
KPVICATQ	PVIC	104510	0			elongation factor 2	P13639	149-166	RIKPVL+MMNKMDRALLE	N	MS	Lys	Pro	Val	Leu	Met	Met	Asn	Lys	Schilling & Overall, 2008
KPVLMMNK	PVLM	5137	9.46			stromal cell-derived factor 1	P48061	22-93	peptide-Ser25+Leu-peptide	P		Lys	Pro	Val	Ser	Leu	Ser	Tyr	Arg	McQuibban et al., 2001	19711
KPVNLGLW	PVNL	27	34.51			Ras-related C3 botulinum toxin substrate 2	Q05144	1-189	peptide-Asn52+Leu-peptide	N	MS	Lys	Pro	Val	Asn	Leu	Gly	Leu	Trp	auf dem Keller et al., 2010
KPVSLSYR	PVSL	147	32.5			Eukaryotic translation initiation factor 4B	Q8BGD9	1-611	peptide-Ser39+Trp-peptide	N	MS	Lys	Pro	Val	Ser	Trp	Ala	Asp	Glu	auf dem Keller et al., 2010
KPVSWADE	PVSW	329	30.23			insulin-like growth factor 2 mRNA-binding protein 2	Q9Y6M1	232-256	peptide-Thr243+Ile-peptide	N	MS	Lys	Pro	Val	Thr	Ile	His	Ala	Thr	Schilling & Overall, 2008
KPVTIHAT	PVTI	4346	11.55			moesin	P26038	140-159	VHKSGY+LAGDKLLPQRVLE	N	MS	Lys	Ser	Gly	Tyr	Leu	Ala	Gly	Asp	Schilling & Overall, 2008
KQADLYIS	QADL	24449	0.47			enoyl-CoA hydratase, mitochondrial precursor	P30084	202-221	AKQAG+LVSKICPVETLVEE	N	MS	Lys	Gln	Ala	Gly	Leu	Val	Ser	Lys	Schilling & Overall, 2008
KQAGLVSK	QAGL	1948	19.26			cDNA FLJ76436	A8K8F0	169-185	KQRA+LLGYADNQCKLE	N	MS	Lys	Gln	Arg	Ala	Leu	Leu	Gly	Tyr	Schilling & Overall, 2008
KQQSLLAK	QQSL	6395	6.82			Fructose-bisphosphate aldolase A	P05064	2-364	peptide-Leu321+Lys-peptide	N	MS	Lys	Glu	Asn	Leu	Lys	Ala	Ala	Gln	auf dem Keller et al., 2010
KQRALLGY	QRAL	2215	18.13			uncharacterized protein C17orf25	Q9Y3E8	375-391	KQRA+LLGYADNQCKLE	N	MS	Lys	Gln	Arg	Ala	Leu	Leu	Gly	Tyr	Schilling & Overall, 2008
KRLQSIGT	RLQS	23459	0.51			ATP-citrate synthase	Q91V92	1-1091	peptide-Ala768+Leu-peptide	N	MS	Lys	Asn	Gln	Ala	Leu	Lys	Glu	Ala	auf dem Keller et al., 2010
-KSELVAN	KSEL	4754	10.41			charged multivesicular body protein 2b	Q9UQN3	2020-01-16	MAS+LFKKKTVDDVIKE	N	MS	-	Met	Ala	Ser	Leu	Phe	Lys	Lys	Schilling & Overall, 2008
KSGYLAGD	SGYL	5664	8.34			T-complex protein 1 subunit gamma	P80318	1-545	peptide-Ala428+Met-peptide	N	MS	Lys	Ser	Lys	Ala	Met	Thr	Gly	Val	auf dem Keller et al., 2010
KSKAMTGV	SKAM	23025	0.53			Activated RNA polymerase II transcriptional coactivator p15	P11031	2-127	peptide-Glu6+Leu-peptide	N	MS	Lys	Ser	Lys	Glu	Leu	Val	Ser	Ser	auf dem Keller et al., 2010
KSKELVSS	SKEL	104599	0			T-complex protein 1 subunit delta	P50991	488-506	KTAG+INVRKGGISNILEE	N	MS	Lys	Thr	Ala	Gly	Ile	Asn	Val	Arg	Schilling & Overall, 2008
--KSLVSK	-KSL					histone H1.3	P16402	85-106	peptide-Ser87+Leu-peptide	N	MS	-	-	Lys	Ser	Leu	Val	Ser	Lys	Schilling & Overall, 2008
KTAGINVR	TAGI	7275	5.34			Rho GDP-dissociation inhibitor 1	Q99PT1	2-204	peptide-Tyr144+Met-peptide	N	MS	Lys	Thr	Asp	Tyr	Met	Val	Gly	Ser	auf dem Keller et al., 2010
KTDYMVGS	TDYM	126706	0			Calponin-2	Q08093	1-305	peptide-Gly135+Leu-peptide	N	MS	Lys	Thr	Lys	Gly	Leu	Gln	Ser	Gly	auf dem Keller et al., 2010
KTFNIKND	TFNI	97235	0			Peptidyl-prolyl cis-trans isomerase B	P24369	34-216	peptide-Trp161+Leu-peptide	N	MS	Lys	Thr	Ser	Trp	Leu	Asp	Gly	Lys	auf dem Keller et al., 2010
KTKGLQSG	TKGL	11060	2.18			S-phase kinase-associated protein 1	Q9WTX5	2-163	peptide-Asn140+Ile-peptide	N	MS	Lys	Thr	Phe	Asn	Ile	Lys	Asn	Asp	auf dem Keller et al., 2010
KTSWLDGK	TSWL	1780	19.95			nucleosome assembly protein 1-like 1	P55209	103-119	RKYAV+LYQPLFDKRFE	N	MS	Lys	Tyr	Ala	Val	Leu	Tyr	Gln	Pro	Schilling & Overall, 2008
KVAGMDVE	VAGM	596	27.56			galectin-1	P16045	2-135	peptide-Gly22+Glu-peptide	N	MS	Lys	Val	Arg	Gly	Glu	Val	Ala	Ser	Kleifeld et al., 2010
KVESLIAQ	VESL	5071	9.59			Microtubule-associated protein RP/EB family member 1	Q61166	2-268	peptide-Lys204+Leu-peptide	N	MS	Lys	Val	Leu	Lys	Leu	Thr	Val	Glu	auf dem Keller et al., 2010
KVLKLTVE	VLKL	11037	2.19			heat shock 70 kDa protein 4L	O95757	760-781	peptide-Glu770+Ile-peptide	N	MS	Lys	Val	Ser	Glu	Ile	Val	Ala	Lys	Schilling & Overall, 2008
KVNRITGL	VNRI	86645	0			Septin-7	O55131	1-436	peptide-Lys370+Leu-peptide	N	MS	Lys	Val	Gln	Lys	Leu	Lys	Asp	Ser	auf dem Keller et al., 2010
KVQKLKDS	VQKL	3631	13.41			Laminin subunit beta-1	P02469	22-1786	peptide-Ser1703+Leu-peptide	N	MS	Lys	Val	Glu	Ser	Leu	Ile	Ala	Gln	Prudova et al., 2010
KVRGEVAS	VRGE	59529	0.08			Lamin-B1	P14733	2-588	peptide-Ser53+Leu-peptide	N	MS	Lys	Val	Arg	Ser	Leu	Glu	Thr	Glu	auf dem Keller et al., 2010
KVRSLETE	VRSL	4049	12.31			Lipoprotein lipase	P11152	28-474	peptide-Arg178+Ile-peptide	N	MS	Lys	Val	Asn	Arg	Ile	Thr	Gly	Leu	auf dem Keller et al., 2010
KVSEIVAK	VSEI	4538	10.99			myosin-9	Q8VDD5	1960-02-01	peptide-His376+Leu-peptide	N	MS	Lys	Val	Ser	His	Leu	Leu	Gly	Ile	Kleifeld et al., 2010
KVSHLLGI	VSHL	335	30.12			Cytochrome b5	P56395	2-134	peptide-Asp36+Leu-peptide	N	MS	Lys	Val	Tyr	Asp	Leu	Thr	Lys	Phe	auf dem Keller et al., 2010
KVVKITSG	VVKI	97898	0			QF-24			Mca-Pro-Leu-Gly+Leu-Dpa-Ala-Arg-NH2	S		Mca	Pro	Leu	Gly	Leu	Dpa	Ala	Arg	Murphy, 2004
KVYDLTKF	VYDL	14700	1.24			SAP domain-containing ribonucleoprotein	Q9D1J3	2-210	peptide-Lys92+Ile-peptide	N	MS	Lys	Val	Val	Lys	Ile	Thr	Ser	Gly	auf dem Keller et al., 2010
KYAVLYQP	YAVL	12899	1.6			14-3-3 protein epsilon	P62259	1-255	peptide-Gly32+Met-peptide	N	MS	Lys	Val	Ala	Gly	Met	Asp	Val	Glu	auf dem Keller et al., 2010
LAACIKGL	AACI	38158	0.2			Dabcyl-Leu-Ala-Gln-Ala-HPh-Arg-Ser-Lys(Fam)-NH2			Dabcyl-Leu-Ala-Gln-Ala+HPh-Arg-Ser-Lys(Fam)-NH2	S		Leu	Ala	Gln	Ala	HPh	Arg	Ser	LyN	Moss & Rasmussen, 2007
-LAALRAL	LAAL	173	32.24			60S acidic ribosomal protein P1	P05386	1933-06-01	peptide-Cys9+Ile-peptide	N	MS	-	Leu	Ala	Cys	Ile	Tyr	Ser	Ala	Schilling & Overall, 2008
LAARLEGH	AARL	2641	16.51			Isocitrate dehydrogenase [NADP] cytoplasmic	O75874	375-396	peptide-Cys379+Ile-peptide	N	MS	Leu	Ala	Ala	Cys	Ile	Lys	Gly	Leu	Schilling & Overall, 2008
-LACIYSA	LACI	6855	5.98			26S proteasome non-ATPase regulatory subunit 12	O00232	408-419	LAG+IINFQRPK	N	MS	-	Leu	Ala	Gly	Ile	Ile	Asn	Phe	Schilling & Overall, 2008
LAGDILAA	AGDI	95754	0			cDNA FLJ78566, highly similar to Homo sapiens glucosidase I, mRNA	A8K938	351-369	LAGS+LLTQALESHAEGFR	N	MS	Leu	Ala	Gly	Ser	Leu	Leu	Thr	Gln	Schilling & Overall, 2008
-LAGIINF	LAGI	619	27.37			ATP-citrate synthase	P53396	669-683	LNN+IISRTTDGVYE	N	MS	-	Leu	Asn	Asn	Ile	Ile	Ser	Arg	Schilling & Overall, 2008
LAGRYYAL	AGRY	31734	0.29			prolactin regulatory element-binding protein	Q9HCU5	70-94	peptide-Asp80+Ile-peptide	N	MS	Leu	Ala	Gly	Asp	Ile	Leu	Ala	Ala	Schilling & Overall, 2008
LAGSLLTQ	AGSL	3106	14.97			cDNA FLJ75504, highly similar to Homo sapiens glucosidase I, mRNA	A8K9K4	76-94	LAGS+LLTQALESHAEGFR	N	MS	Leu	Ala	Gly	Ser	Leu	Leu	Thr	Gln	Schilling & Overall, 2008
LAKAIEKN	AKAI	3580	13.56			40S ribosomal protein S27	Q6ZWU9	1984-02-01	peptide-Asp6+Leu-peptide	N	MS	Leu	Ala	Lys	Asp	Leu	Leu	His	Pro	auf dem Keller et al., 2010
LAKDLLHP	AKDL	12077	1.82			programmed cell death 6-interacting protein	Q8WUM4	16-35	LAKP+LVKFIQQTYPSGGEE	N	MS	Leu	Ala	Lys	Pro	Leu	Val	Lys	Phe	Schilling & Overall, 2008
LAKPLVKF	AKPL	1615	20.83			annexin A2 isoform 2	P07355-2	100-114	LASA+LKSALSGHLE	N	MS	Leu	Ala	Ser	Ala	Leu	Lys	Ser	Ala	Schilling & Overall, 2008
LALALSQS	ALAL	1368	22.12			Bifunctional purine biosynthesis protein PURH	Q9CWJ9	1-592	peptide-Phe9+Ser-peptide	N	MS	Leu	Ala	Leu	Phe	Ser	Val	Ser	Asp	auf dem Keller et al., 2010
LALFSVSD	ALFS	935	24.9			bifunctional purine biosynthesis protein PURH	P31939	2020-01-19	MAPGQ+LALFSVSDKTGLVE	N	MS	Ala	Pro	Gly	Gln	Leu	Ala	Leu	Phe	Schilling & Overall, 2008
LALPFFGF	ALPF	4743	10.46			cAMP-dependent protein kinase type I-alpha regulatory subunit	Q9DBC7	2-381	peptide-Ala131+Ile-peptide	N	MS	Leu	Ala	Lys	Ala	Ile	Glu	Lys	Asn	auf dem Keller et al., 2010
LAQAIRSL	AQAI	4890	10.06			creatine kinase B-type	P12277	168-181	LAGR+YYALKSMTE	N	MS	Leu	Ala	Gly	Arg	Tyr	Tyr	Ala	Leu	Schilling & Overall, 2008
LASALKSA	ASAL	451	28.91			annexin A2	Q8TBV2	82-96	LASA+LKSALSGHLE	N	MS	Leu	Ala	Ser	Ala	Leu	Lys	Ser	Ala	Schilling & Overall, 2008
LATALQKL	ATAL	1240	22.95			Coatomer subunit epsilon isoform 2	O14579-2	1-257	peptide-Ala136+Trp-peptide	N	MS	Leu	Ala	Thr	Ala	Trp	Val	Ser	Leu	Schilling & Overall, 2008
LATAWVSL	ATAW	4679	10.64			coatomer subunit epsilon	O14579	171-197	peptide-Ala187+Trp-peptide	N	MS	Leu	Ala	Thr	Ala	Trp	Val	Ser	Leu	Schilling & Overall, 2008
LATQLTGP	ATQL	73813	0.04			Heat shock 70 kDa protein 4	Q61316	1-841	peptide-Gly182+Ile-peptide	N	MS	Leu	Ala	Tyr	Gly	Ile	Tyr	Lys	Gln	auf dem Keller et al., 2010
LAYGIYKQ	AYGI	3176	14.74			Dynactin subunit 1	O08788	1-1281	peptide-Glu934+Ile-peptide	N	MS	Leu	Arg	Ala	Glu	Ile	Thr	Asp	Ala	auf dem Keller et al., 2010
LCASLLAR	CASL	5213	9.3			DNA-(apurinic or apyrimidinic site) lyase	P27695	202-221	KPLVLCGD+LNVAHEEIDLR	N	MS	Leu	Cys	Gly	Asp	Leu	Asn	Val	Ala	Schilling & Overall, 2008
LCGDLNVA	CGDL	44430	0.15			DNA-(apurinic or apyrimidinic site) lyase	P28352	2-317	peptide-Asp209+Leu-peptide	N	MS	Leu	Cys	Gly	Asp	Leu	Asn	Val	Ala	auf dem Keller et al., 2010
-LCGIVAS	LCGI	13632	1.44			ribonuclease inhibitor	P13489	218-231	LCG+IVASKASLRE	N	MS	-	Leu	Cys	Gly	Ile	Val	Ala	Ser	Schilling & Overall, 2008
LCSGVLGT	CSGV	101604	0			microtubule-actin cross-linking factor 1, isoform 4	Q9UPN3-5	3227-3246	LQAA+LASTQQFQQMFDELR	N	MS	Leu	Gln	Ala	Ala	Leu	Ala	Ser	Thr	Schilling & Overall, 2008
-LDNLVAI	LDNL	5651	8.38			ribonuclease/angiogenin inhibitor	Q8IZK8	218-231	LCG+IVASKASLRE	N	MS	-	Leu	Cys	Gly	Ile	Val	Ala	Ser	Schilling & Overall, 2008
LEADIIGD	EADI	152560	0			Annexin	A6NN80	1-667	DLEAD+IIGDTSGHFQK	N	MS	Leu	Glu	Ala	Asp	Ile	Ile	Gly	Asp	Schilling & Overall, 2008
LEGRYFSG	EGRY	19264	0.73			Triosephosphate isomerase	P17751	2-299	peptide-Thr90+Trp-peptide	N	MS	Leu	Gly	Ala	Thr	Trp	Val	Val	Leu	auf dem Keller et al., 2010
-LEHLITE	LEHL	4330	11.59			CTP synthase 1	P17812	341-356	LEP+ITSQEEPVRYHE	N	MS	-	Leu	Glu	Pro	Ile	Thr	Ser	Gln	Schilling & Overall, 2008
-LEPITSQ	LEPI	28720	0.35			high mobility group protein 1-like 10	B2RPK0	128-146	LGE+MWNNTAADDKQPYEK	N	MS	-	Leu	Gly	Glu	Met	Trp	Asn	Asn	Schilling & Overall, 2008
LERTFIAI	ERTF	70885	0.05			syndecan-4	P31431	19-198	peptide-Arg36+Tyr-peptide	P	NT	Leu	Glu	Gly	Arg	Tyr	Phe	Ser	Gly	Manon-Jensen et al., 2013
LFAKNDLA	FAKN	41051	0.17			plasminogen	P00747	20-810	peptide-Lys96+Lys-peptide	P	NT	Leu	Phe	Glu	Lys	Lys	Val	Tyr	Leu	Cornelius et al., 1998
LFEKKVYL	FEKK	137356	0			Bifunctional purine biosynthesis protein PURH	Q9CWJ9	1-592	peptide-Asn402+Ile-peptide	N	MS	Leu	Phe	Ser	Asn	Ile	Val	Thr	Lys	Prudova et al., 2010
LFSNIVTK	FSNI	2810	15.87			intracellular platelet-activating factor acetylhydrolase alpha 2 subunit variant 5	A8DPS5	60-79	ELFSP+LHALNFGIGGDTTR	N	MS	Leu	Phe	Ser	Pro	Leu	His	Ala	Leu	Schilling & Overall, 2008
LFSPLHAL	FSPL	3161	14.78			intracellular platelet-activating factor acetylhydrolase alpha 2 subunit variant 4	A8DPS6	60-79	ELFSP+LHALNFGIGGDTTR	N	MS	Leu	Phe	Ser	Pro	Leu	His	Ala	Leu	Schilling & Overall, 2008
LFTNLASD	FTNL	45305	0.14			Heterogeneous nuclear ribonucleoproteins A2/B1	O88569	1-353	peptide-Gly117+Gly-peptide	N	MS	Leu	Phe	Val	Gly	Gly	Ile	Lys	Glu	auf dem Keller et al., 2010
LFVGGIKE	FVGG	12785	1.62			ERBB receptor feedback inhibitor 1	Q9UJM3	412-442	peptide-Asp429+Cys-peptide	N	MS	Leu	Pro	Ala	Asp	Cys	Gly	Ile	Ser	Schilling & Overall, 2008
LGATWVVL	GATW	57201	0.09			Nidogen-1	P10493	29-1245	peptide-Thr1032+Ile-peptide	N	MS	Leu	Gly	Arg	Thr	Ile	Phe	Trp	Thr	auf dem Keller et al., 2010
LGDVYVND	GDVY	47870	0.13			Phosphoglycerate kinase 2	P09041	2-417	peptide-Val160+Tyr-peptide	N	MS	Leu	Gly	Asp	Val	Tyr	Val	Asn	Asp	auf dem Keller et al., 2010
-LGEMWNN	LGEM	1088	23.98			high mobility group protein B1	P09429	128-146	LGE+MWNNTAADDKQPYEK	N	MS	-	Leu	Gly	Glu	Met	Trp	Asn	Asn	Schilling & Overall, 2008
-LGEMWSE	LGEM	1088	23.98			high-mobility group box 2	Q5U071	128-139	LGE+MWSEQSAK	N	MS	-	Leu	Gly	Glu	Met	Trp	Ser	Glu	Schilling & Overall, 2008
LGGSLADS	GGSL	7970	4.46			Branched-chain-amino-acid aminotransferase, cytosolic	P24288	1-386	peptide-Leu369+Thr-peptide	N	MS	Leu	Gly	Lys	Leu	Thr	Asp	Ile	Gln	auf dem Keller et al., 2010
LGKLTDIQ	GKLT	31060	0.3			collagen alpha-1(II) chain	P02458	182-1241	peptide-Lys452+Gly-peptide	P	MS	Leu	Gly	Pro	Lys	Gly	Gln	Thr	Gly	Zhen et al., 2008	22932
LGNKYESC	GNKY	124966	0			Phosphoglycerate kinase 1	P09411	2-417	peptide-Val160+Tyr-peptide	N	MS	Leu	Gly	Asp	Val	Tyr	Val	Asn	Asp	auf dem Keller et al., 2010
LGPKGQTG	GPKG	13336	1.49			T-complex protein 1 subunit theta	P50990	206-224	ILGSG+ISSSSVLHGMVFK	N	MS	Leu	Gly	Ser	Gly	Ile	Ser	Ser	Ser	Schilling & Overall, 2008
LGRTIFWT	GRTI	70204	0.05			72 kDa type IV collagenase	P08253	110-660	peptide-Lys359+Tyr-peptide	P	MS	Leu	Gly	Asn	Lys	Tyr	Glu	Ser	Cys	auf dem Keller et al., 2010
LGSGISSS	GSGI	38715	0.2			Chitinase-3-like protein 3	O35744	1-398	peptide-Ser21+Tyr-peptide	P	NT	Leu	Gly	Ser	Ser	Tyr	Gln	Leu	Met	Greenlee et al., 2006
-LGSLFQA	LGSL	445	28.98			heat shock-related 70 kDa protein 2	P54652	2020-11-28	LGT+TYSCVGVFQHGKVE	N	MS	-	Leu	Gly	Thr	Thr	Tyr	Ser	Cys	Schilling & Overall, 2008
LGSSYQLM	GSSY	19284	0.73			Beta-enolase	P21550	2-434	peptide-Ser115+Leu-peptide	N	MS	Leu	Gly	Val	Ser	Leu	Ala	Val	Cys	auf dem Keller et al., 2010
-LGTTYSC	LGTT	59988	0.08			heat shock 70 kDa protein 1L	P34931	2020-12-29	LGT+TYSCVGVFQHGKVE	N	MS	-	Leu	Gly	Thr	Thr	Tyr	Ser	Cys	Schilling & Overall, 2008
LGVSLAVC	GVSL	51507	0.11			beta-enolase	P13929	105-120	FGANA+ILGVSLAVCK	N	MS	Gly	Ala	Asn	Ala	Ile	Leu	Gly	Val	Schilling & Overall, 2008
LHAAMADT	HAAM	1815	19.81			Pyruvate kinase isozymes M1/M2	P52480	2-531	peptide-Ala21+Met-peptide	N	MS	Leu	His	Ala	Ala	Met	Ala	Asp	Thr	Prudova et al., 2010
LHANLARA	HANL	275	30.86			exosome complex exonuclease RRP42	Q15024	264-283	VLHAS+LQSVLHKEESLGPK	N	MS	Leu	His	Ala	Ser	Leu	Gln	Ser	Val	Schilling & Overall, 2008
LHASLQSV	HASL	741	26.26			transketolase	P29401	499-524	peptide-Ala515+Leu-peptide	N	MS	Leu	His	Glu	Ala	Leu	Ala	Ala	Ala	Schilling & Overall, 2008
LHEALAAA	HEAL	13944	1.38			Histone-binding protein RBBP4	Q60972	2-425	peptide-Ser241+Leu-peptide	N	MS	Leu	His	Glu	Ser	Leu	Phe	Gly	Ser	auf dem Keller et al., 2010
LHESLFGS	HESL	16048	1.04			Histone-binding protein RBBP7	Q60973	1-425	peptide-Ser240+Leu-peptide	N	MS	Leu	His	Glu	Ser	Leu	Phe	Gly	Ser	auf dem Keller et al., 2010
LIAELQDC	IAEL	853	25.36			eukaryotic translation initiation factor 3 subunit H	O15372	313-331	MDSLLIAG+QINTYCQNIK	N	MS	Leu	Ile	Ala	Gly	Gln	Ile	Asn	Thr	Schilling & Overall, 2008
LIAGQINT	IAGQ	3012	15.22			protein S100-A11	P31949	15-38	peptide-Val20+Phe-peptide	N	MS	Leu	Ile	Ala	Val	Phe	Gln	Lys	Tyr	Schilling & Overall, 2008
LIANSLAT	IANS	2530	16.88			prohibitin	P35232	219-239	AAE+LIANSLATAGDGLIELR	N	MS	-	Ala	Ala	Glu	Leu	Ile	Ala	Asn	Schilling & Overall, 2008
LIAVFQKY	IAVF	86222	0			T-complex protein 1 subunit zeta	P80317	2-531	peptide-Gly209+Leu-peptide	N	MS	Leu	Ile	Arg	Gly	Leu	Val	Leu	Asp	Prudova et al., 2010
LIGCIIGR	IGCI	11610	1.98			protein S100-A11	P31949	66-97	peptide-Gly86+Leu-peptide	N	MS	Leu	Ile	Gly	Gly	Leu	Ala	Met	Ala	Schilling & Overall, 2008
LIGDLCTA	IGDL	1625	20.77			Poly(rC)-binding protein 2	Q15366	297-312	LIGC+IIGRQGAKINE	N	MS	Leu	Ile	Gly	Cys	Ile	Ile	Gly	Arg	Schilling & Overall, 2008
LIGGLAMA	IGGL	714	26.48			copine-3	O75131	224-238	LIGT+FQTTMTKLKE	N	MS	Leu	Ile	Gly	Thr	Phe	Gln	Thr	Thr	Schilling & Overall, 2008
LIGTFQTT	IGTF	17399	0.89			Heat shock protein HSP 90-alpha	P07901	2-733	peptide-Asn35+Thr-peptide	N	MS	Leu	Ile	Ile	Asn	Thr	Phe	Tyr	Ser	auf dem Keller et al., 2010
LIINTFYS	IINT	124307	0			Nucleobindin-2	P81117	25-420	peptide-Ala161+Ala-peptide	N	MS	Leu	Ile	Lys	Ala	Ala	Thr	Ala	Asp	auf dem Keller et al., 2010
LIKAATAD	IKAA	22606	0.54			putative heat shock protein HSP 90-beta-3	Q58FF7	42-57	LISN+ASDALDKIRYE	N	MS	Leu	Ile	Ser	Asn	Ala	Ser	Asp	Ala	Schilling & Overall, 2008
LINNLGTI	INNL	2501	17			heat shock protein beta	O14942	46-58	AD+LINNLGTIAK	N	MS	-	-	Ala	Asp	Leu	Ile	Asn	Asn	Schilling & Overall, 2008
LIRGLVLD	IRGL	367	29.81			heat shock protein beta	O14942	48-66	LINN+LGTIAKSGTKAFME	N	MS	Leu	Ile	Asn	Asn	Leu	Gly	Thr	Ile	Schilling & Overall, 2008
LISNASDA	ISNA	15527	1.12			heat shock protein HSP 90-beta 2, putative	Q58FF8	42-56	E+LISNASDALDKIRY	N	MS	-	-	-	Glu	Leu	Ile	Ser	Asn	Schilling & Overall, 2008
LISNSSDA	ISNS	5382	8.92			full-length cDNA 5-PRIME end of clone CS0DN005YI08 of Adult brain of Homo sapiens	Q86SX1	167-183	RE+LISNSSDALDKIRY	N	MS	-	-	Arg	Glu	Leu	Ile	Ser	Asn	Schilling & Overall, 2008
LKGLLQSG	KGLL	26654	0.4			Histone H1.4	P43274	2-219	peptide-Ala65+Leu-peptide	N	MS	Leu	Lys	Lys	Ala	Leu	Ala	Ala	Ala	auf dem Keller et al., 2010
LKKALAAA	KKAL	150414	0			histone H1t	P22492	64-75	A+LKKALAAAGY	N	MS	-	-	-	Ala	Leu	Lys	Lys	Ala	Schilling & Overall, 2008
LKQNIAKG	KQNI	17523	0.88			Tumor protein D52 isoform 3	P55327-3	142-165	peptide-Asn146+Ile-peptide	N	MS	Leu	Lys	Gln	Asn	Ile	Ala	Lys	Gly	Schilling & Overall, 2008
-LKSLLGK	LKSL	5143	9.46			phosphoglycerate kinase 2	P07205	84-98	LKS+LLGKDVLFLKD	N	MS	-	Leu	Lys	Ser	Leu	Leu	Gly	Lys	Schilling & Overall, 2008
LKVAQSDK	KVAQ	53056	0.1			Microtubule-associated protein RP/EB family member 1	Q61166	2-268	peptide-Gln199+Val-peptide	N	MS	Leu	Met	Gln	Gln	Val	Lys	Val	Leu	auf dem Keller et al., 2010
LLAALGGN	LAAL	173	32.24			talin-1	Q9Y490	592-613	peptide-Ala596+Leu-peptide	N	MS	Leu	Leu	Ala	Ala	Leu	Leu	Glu	Asp	Schilling & Overall, 2008
LLAALLED	LAAL	173	32.24			glucose-6-phosphate isomerase	P06744	423-438	ILLAN+FLAQTEALMR	N	MS	Leu	Leu	Ala	Asn	Phe	Leu	Ala	Gln	Schilling & Overall, 2008
LLADAVAV	LADA	47552	0.13			vimentin	P08670	129-143	ILLAE+LEQLKGQGK	N	MS	Leu	Leu	Ala	Glu	Leu	Glu	Gln	Leu	Schilling & Overall, 2008
LLAELEQL	LAEL	646	27.08			72 kDa type IV collagenase	P08253	110-660	peptide-His193+Ala-peptide	P	MS	Leu	Leu	Ala	His	Ala	Phe	Ala	Pro	auf dem Keller et al., 2010
LLAHAFAP	LAHA	4607	10.83			cDNA FLJ76425, highly similar to Homo sapiens ATX1 antioxidant protein 1 homolog	A8KAJ8	49-68	TLLAT+LKKTGKTVSYLGLE	N	MS	Leu	Leu	Ala	Thr	Leu	Lys	Lys	Thr	Schilling & Overall, 2008
LLANFLAQ	LANF	783	25.97			60 kDa heat shock protein, mitochondrial	P63038	27-573	peptide-Asp49+Ala-peptide	N	MS	Leu	Leu	Ala	Asp	Ala	Val	Ala	Val	auf dem Keller et al., 2010
LLATLKKT	LATL	1071	24.06			Proteasome subunit beta type-4	P99026	46-264	peptide-Glu197+Val-peptide	N	MS	Leu	Leu	Arg	Glu	Val	Leu	Glu	Lys	auf dem Keller et al., 2010
LLDLITWE	LDLI	33578	0.26			Heat shock factor-binding protein 1	Q9CQZ1	1976-01-01	peptide-Gln22+Met-peptide	N	MS	Leu	Leu	Gln	Gln	Met	Gln	Asp	Lys	auf dem Keller et al., 2010
LLEALFLS	LEAL	4051	12.3			FK506-binding protein 3	Q00688	40-68	peptide-Asn46+Ile-peptide	N	MS	Leu	Leu	Gly	Asn	Ile	Lys	Asn	Val	Schilling & Overall, 2008
LLFPLTAQ	LFPL	20314	0.67			Eukaryotic translation initiation factor 4B	Q8BGD9	1-611	peptide-Ala153+Leu-peptide	N	MS	Leu	Leu	Ser	Ala	Leu	Ser	Leu	Asn	auf dem Keller et al., 2010
LLGHWEEA	LGHW	1495	21.41			protein FAM10A4	Q8IZP2	189-206	LLGH+WEEAAHDLALACK	N	MS	Leu	Leu	Gly	His	Trp	Glu	Glu	Ala	Schilling & Overall, 2008
LLGNIKNV	LGNI	791	25.88			importin subunit beta-3	O00410	2020-07-31	peptide-Asn17+Leu-peptide	N	MS	Leu	Leu	Gly	Asn	Leu	Leu	Ser	Pro	Schilling & Overall, 2008
LLGNLLSP	LGNL	74	33.35			Importin-5	Q8BKC5	2-1097	peptide-Asn17+Leu-peptide	N	MS	Leu	Leu	Gly	Asn	Leu	Leu	Ser	Pro	Prudova et al., 2010
LLKHYRGP	LKHY	6315	7			neutral amino acid transporter B	Q15758	516-538	peptide-His523+Tyr-peptide	N	MS	Leu	Leu	Lys	His	Tyr	Arg	Gly	Pro	Schilling & Overall, 2008
LLQGVHQG	LQGV	17381	0.89			Plectin	Q9QXS1-16	4544-01-01	peptide-Ser969+Leu-peptide	N	MS	Leu	Leu	Gln	Ser	Leu	Glu	Gln	Gly	Prudova et al., 2010
LLQQMQDK	LQQM	8560	3.8			translin variant	Q53GR3	36-56	EILTLLQG+VHQGAGFQDIPK	N	MS	Leu	Leu	Gln	Gly	Val	His	Gln	Gly	Schilling & Overall, 2008
LLQSLEQG	LQSL	1250	22.81			Prostaglandin reductase 1	Q91YR9	1-329	peptide-Ala41+Leu-peptide	N	MS	Leu	Leu	Glu	Ala	Leu	Phe	Leu	Ser	auf dem Keller et al., 2010
LLREVLEK	LREV	39603	0.19			heat shock protein HSP 90-beta	P11499	2-724	peptide-Tyr457+His-peptide	N	MS	Leu	Leu	Arg	Tyr	His	Thr	Ser	Gln	Kleifeld et al., 2010
LLRYHTSQ	LRYH	32991	0.27			Heat shock protein HSP 90-alpha	P07901	2-733	peptide-Tyr466+Tyr-peptide	N	MS	Leu	Leu	Arg	Tyr	Tyr	Thr	Ser	Ala	auf dem Keller et al., 2010
LLRYYTSA	LRYY	5054	9.67			Dickkopf-related protein 3	Q9QUN9	23-349	peptide-Leu251+Ile-peptide	N	MS	Leu	Leu	Asp	Leu	Ile	Thr	Trp	Glu	auf dem Keller et al., 2010
LLSALSLN	LSAL	112	32.9			Eukaryotic translation initiation factor 3 subunit A	P23116	2-1344	peptide-Ala131+Val-peptide	N	MS	Leu	Leu	Ser	Ala	Val	Ser	Gly	Glu	auf dem Keller et al., 2010
LLSAVSGE	LSAV	6684	6.28			myotrophin	P58546	66-85	HHITPLLSA+VYEGHVSCVK	N	MS	Leu	Leu	Ser	Ala	Val	Tyr	Glu	Gly	Schilling & Overall, 2008
LLSAVYEG	LSAV	6684	6.28			fatty acid synthase	P49327	1470-1495	peptide-Asn1476+Leu-peptide	N	MS	Leu	Leu	Ser	Asn	Leu	Ser	Ser	Thr	Schilling & Overall, 2008
LLSGLLDS	LSGL	345	30.03			tyrosyl-tRNA synthetase, cytoplasmic	P54577	154-178	peptide-Gly163+Leu-peptide	N	MS	Leu	Leu	Ser	Gly	Leu	Leu	Tyr	Pro	Schilling & Overall, 2008
LLSGLLYP	LSGL	345	30.03			karatin, type II cytoskeletal 8	P05787	47-88	peptide-Pro75+Leu-peptide	N	MS	Leu	Leu	Ser	Pro	Leu	Val	Leu	Glu	Schilling & Overall, 2008
LLSNLSST	LSNL	148	32.5			fatty acid synthase	P49327	1208-1225	LPEDPLLSG+LLDSPALK	N	MS	Leu	Leu	Ser	Gly	Leu	Leu	Asp	Ser	Schilling & Overall, 2008
LLSPLVLE	LSPL	491	28.54			Dystroglycan	Q62165	28-893	peptide-Trp258+Lys-peptide	N	MS	Leu	Leu	Ser	Trp	Lys	Leu	Gly	Cys	auf dem Keller et al., 2010
LLSWKLGC	LSWK	25713	0.43			Tumor protein D52	P55327	119-141	peptide-Asn122+Ile-peptide	N	MS	Leu	Lys	Gln	Asn	Ile	Ala	Lys	Gly	Schilling & Overall, 2008
LMQQVKVL	MQQV	129588	0			phosphoglycerate kinase 1 (EC 2.7.2.3)	P00558	57-75	VVLMSH+LGRPDGVPMPDK	N	MS	Leu	Met	Ser	His	Leu	Gly	Arg	Pro	Schilling & Overall, 2008
LMSHLGRP	MSHL	990	24.62			phosphoglycerate kinase 2	P07205	57-75	VVLMSH+LGRPDGVPMPDK	N	MS	Leu	Met	Ser	His	Leu	Gly	Arg	Pro	Schilling & Overall, 2008
LMSLIINT	MSLI	17006	0.93			Nucleolin	P09405	2-707	peptide-Lys335+Asn-peptide	N	MS	Leu	Phe	Ala	Lys	Asn	Asp	Leu	Ala	Prudova et al., 2010
LNDRFANY	NDRF	119316	0			14-3-3 protein epsilon	P62259	1-255	peptide-Ser178+Val-peptide	N	MS	Leu	Asn	Phe	Ser	Val	Phe	Tyr	Tyr	auf dem Keller et al., 2010
LNFSVFYY	NFSV	54866	0.09			heat shock 70 kDa protein 4L	O95757	307-326	QLCAS+LLARVEPPLKAVME	N	MS	Leu	Cys	Ala	Ser	Leu	Leu	Ala	Arg	Schilling & Overall, 2008
-LNKLLGK	LNKL	11569	2			histone H2A type 2-C	Q16777	93-122	peptide-Lys96+Leu-peptide	N	MS	-	Leu	Asn	Lys	Leu	Leu	Gly	Lys	Schilling & Overall, 2008
-LNNIISR	LNNI	4977	9.85			cDNA, FLJ92149, Homo sapiens ribosomal protein S25	B2R4M7	43-57	LNN+LVLFDKATYDK	N	MS	-	Leu	Asn	Asn	Leu	Val	Leu	Phe	Schilling & Overall, 2008
-LNNLVLF	LNNL	1491	21.42			histone H2A type 1-J	Q99878	93-122	peptide-Lys96+Leu-peptide	N	MS	-	Leu	Asn	Lys	Leu	Leu	Gly	Lys	Schilling & Overall, 2008
LPADCGIS	PADC	32420	0.28			Vacuolar protein sorting-associated protein VTA1 homolog	Q9CR26	2-309	peptide-Gln13+Phe-peptide	N	MS	Leu	Pro	Ala	Gln	Phe	Lys	Ser	Ile	Prudova et al., 2010
LPAQFKSI	PAQF	1007	24.5			6-phosphogluconate dehydrogenase, decarboxylating	P52209	436-456	MLPAS+LIQAQRDYFGAHTYE	N	MS	Leu	Pro	Ala	Ser	Leu	Ile	Gln	Ala	Schilling & Overall, 2008
LPASLIQA	PASL	2	36.43			Ubiquitin-like modifier-activating enzyme 1	Q02053	1-1058	peptide-Ser309+Leu-peptide	N	MS	Leu	Pro	Ala	Ser	Leu	Val	Glu	Pro	Prudova et al., 2010
LPASLVEP	PASL	2	36.43			Pleckstrin homology-like domain family B member 1	Q6PDH0	1-1371	peptide-Asn1026+Leu-peptide	N	MS	Leu	Pro	Arg	Asn	Leu	Ala	Ala	Thr	Prudova et al., 2010
LPDCLKGC	PDCL	41442	0.17			Actin, gamma-enteric smooth muscle	P63268	3-376	peptide-Gly246+Gln-peptide	N	MS	Leu	Pro	Asp	Gly	Gln	Val	Ile	Thr	auf dem Keller et al., 2010
-LPDGQVI	LPDG	108691	0			actin, aortic smooth muscle	P62736	243-257	LPD+GQVITIGNERF	N	MS	-	Leu	Pro	Asp	Gly	Gln	Val	Ile	Schilling & Overall, 2008
LPDGQVIT	PDGQ	112563	0			Actin, aortic smooth muscle	P62737	3-377	peptide-Gly247+Gln-peptide	N	MS	Leu	Pro	Asp	Gly	Gln	Val	Ile	Thr	auf dem Keller et al., 2010
LPGELAKH	PGEL	535	28.15			histone H2B type F-S	P57053	102-122	LPGE+LAKHAVSEGTKAVTKY	N	MS	Leu	Pro	Gly	Glu	Leu	Ala	Lys	His	Schilling & Overall, 2008
LPGQMAGT	PGQM	1052	24.21			histone H2B type 3-B	Q8N257	102-122	LPGE+LAKHAVSEGTKAVTKY	N	MS	Leu	Pro	Gly	Glu	Leu	Ala	Lys	His	Schilling & Overall, 2008
LPKPTWGN	PKPT	29194	0.34			Elongation factor 1-gamma	Q9D8N0	2-437	peptide-Ser286+Thr-peptide	N	MS	Leu	Pro	Lys	Ser	Thr	Phe	Val	Leu	auf dem Keller et al., 2010
LPKSTFVL	PKST	85839	0			60S ribosomal protein L38	P63173	56-70	KQSLPPG+LAVKELK	N	MS	Leu	Pro	Pro	Gly	Leu	Ala	Val	Lys	Schilling & Overall, 2008
LPLAVVGS	PLAV	427	29.15			septin	A8K3D0	242-259	LPLA+VVGSNTIIEVNGK	N	MS	Leu	Pro	Leu	Ala	Val	Val	Gly	Ser	Schilling & Overall, 2008
LPLPNFSS	PLPN	12183	1.79			aspartate aminotransferase, mitochondrial precursor	P00505	153-170	DVFLPKP+TWGNHTPIFR	N	MS	Leu	Pro	Lys	Pro	Thr	Trp	Gly	Asn	Schilling & Overall, 2008
LPPGLAVK	PPGL	1031	24.36			prolactin	P01236	29-227	peptide-Leu184+Gln-peptide	P		Leu	Pro	Ser	Leu	Gln	Met	Ala	Asp	Macotela et al., 2006	21574
LPQEIKAN	PQEI	4293	11.67			Glycylpeptide N-tetradecanoyltransferase 1	O70310	1-496	peptide-Gly155+Phe-peptide	N	MS	Leu	Pro	Gln	Gly	Phe	Thr	Trp	Asp	auf dem Keller et al., 2010
LPQGFTWD	PQGF	651	27.05			PRO2397	Q9H351	34-75	peptide-Leu66+Leu-peptide	N	MS	Leu	Pro	Gln	Leu	Leu	Leu	Gln	Val	Schilling & Overall, 2008
LPQLLLQV	PQLL	1286	22.61			putative uncharacterized protein GORASP2	Q53TE3	209-233	peptide-Gln218+Met-peptide	N	MS	Leu	Pro	Gly	Gln	Met	Ala	Gly	Thr	Schilling & Overall, 2008
LPRHRDTG	PRHR	73230	0.04			malate dehydrogenase, mitochondrial precursor	P40926	78-104	peptide-Cys89+Leu-peptide	N	MS	Leu	Pro	Asp	Cys	Leu	Lys	Gly	Cys	Schilling & Overall, 2008
LPRNLAAT	PRNL	15	35.13			myelin basic protein isoform 1	P02686	135-304	peptide-His166+Arg-peptide	P	MS	Leu	Pro	Arg	His	Arg	Asp	Thr	Gly	Shiryaev et al., 2009
LPSLQMAD	PSLQ	6015	7.65			Heat shock 70 kDa protein 4	Q61316	1-841	peptide-Gly97+Leu-peptide	N	MS	Leu	Pro	Thr	Gly	Leu	Thr	Gly	Ile	Prudova et al., 2010
LPTGLTGI	PTGL	94	33.11			decorin	P28654	31-354	peptide-Ser217+Leu-peptide	N	MS	Leu	Pro	Thr	Ser	Leu	Thr	Glu	Val	Kleifeld et al., 2010
LPTSLTEV	PTSL	449	28.93			Spectrin beta chain, brain 1	Q62261	2363-01-01	peptide-Ser2331+Val-peptide	N	MS	Leu	Pro	Thr	Ser	Val	Val	Thr	Ile	auf dem Keller et al., 2010
LPTSVVTI	PTSV	22526	0.55			phosphoglycerate kinase 1 (EC 2.7.2.3)	P00558	279-297	ITLPVD+FVTADKFDENAK	N	MS	Leu	Pro	Val	Asp	Phe	Val	Thr	Ala	Schilling & Overall, 2008
LPVDFVTA	PVDF	3306	14.39			GANAB protein	Q9BS14	153-174	peptide-Thr165+Leu-peptide	N	MS	Leu	Pro	Val	Thr	Leu	Ser	Ser	Ile	Schilling & Overall, 2008
LPVTLSSI	PVTL	1432	21.8			dynactin subunit 2	Q13561	245-267	peptide-Gly251+Leu-peptide	N	MS	Leu	Ser	Ala	Gly	Leu	Gln	Gly	Ala	Schilling & Overall, 2008
LQAALAST	QAAL	874	25.26			Actin-related protein 2/3 complex subunit 5	Q9CPW4	2-151	peptide-Ala58+Leu-peptide	N	MS	Leu	Gln	Ala	Ala	Leu	Lys	Asn	Pro	auf dem Keller et al., 2010
LQAALKNP	QAAL	874	25.26			vacuolar protein sorting-associating protein 4A	Q9UN37	108-125	LQEQ+LMGAVVMEKPNIR	N	MS	Leu	Gln	Glu	Gln	Leu	Met	Gly	Ala	Schilling & Overall, 2008
-LQAWKSP	LQAW	4951	9.92			cytoplasmic dynein 1 heavy chain 1	Q14204	1807-1819	LEH+LITELVHQR	N	MS	-	Leu	Glu	His	Leu	Ile	Thr	Glu	Schilling & Overall, 2008
LQEQLMGA	QEQL	114845	0			histone H2A.x	P16104	82-96	HLQLA+IRNDEELNK	N	MS	Leu	Gln	Leu	Ala	Ile	Arg	Asn	Asp	Schilling & Overall, 2008
LQLAIRGD	QLAI	84178	0			histone H2AV	Q71UI9	85-102	HLQLA+IRGDEELDSLIK	N	MS	Leu	Gln	Leu	Ala	Ile	Arg	Gly	Asp	Schilling & Overall, 2008
LQLAIRND	QLAI	84178	0			histone H2A type 1-B	P04908	82-96	HLQLA+IRNDEELNK	N	MS	Leu	Gln	Leu	Ala	Ile	Arg	Asn	Asp	Schilling & Overall, 2008
LQSKYIGT	QSKY	82548	0			transcription factor BTF3 homolog 4	Q96K17	36-56	KKLQSS+LKKLAVNNIAGIEE	N	MS	Leu	Gln	Ser	Ser	Leu	Lys	Lys	Leu	Schilling & Overall, 2008
LQSSLKKL	QSSL	2932	15.42			cDNA FLJ75116, highly similar to Homo sapiens annexin A6, transcript variant 1, mRNA	A8K3Q7	140-156	DLEAD+IIGDTSGHFQK	N	MS	Leu	Glu	Ala	Asp	Ile	Ile	Gly	Asp	Schilling & Overall, 2008
LRAEITDA	RAEI	13497	1.46			insulin-like growth factor binding protein 3	P17936	28-291	peptide-Tyr126+Leu-peptide	P		Leu	Arg	Ala	Tyr	Leu	Leu	Pro	Ala	Fowlkes et al., 1994	3228
LRAYLLPA	RAYL	16287	1.01			Endoplasmin	P08113	22-802	peptide-Leu104+Ile-peptide	N	MS	Leu	Arg	Glu	Leu	Ile	Ser	Asn	Ala	auf dem Keller et al., 2010
LRELISNA	RELI	30011	0.32			Triosephosphate isomerase	P17751	2-299	peptide-Trp192+Leu-peptide	N	MS	Leu	Arg	Gly	Trp	Leu	Lys	Ser	Asn	Prudova et al., 2010
LRGWLKSN	RGWL	8023	4.39			Ser-Gly-Leu-Arg-Leu-Ala-Ala-Ile-Thr-Ala			Ser-Gly-Leu-Arg-Leu-Ala-Ala+Ile-Thr-Ala	N		Leu	Arg	Leu	Ala	Ile	Thr	Ala	-	Murphy, 2004
LRLAITA-	RLAI	60701	0.08			Vimentin	P20152	2-466	peptide-Arg113+Phe-peptide	N	MS	Leu	Asn	Asp	Arg	Phe	Ala	Asn	Tyr	Prudova et al., 2010
LSAGLQGA	SAGL	2433	17.23			acidic leucine-rich nuclear phosphoprotein 32 family member E	Q9BTT0	68-86	LELSDN+IISGGLEVLAEK	N	MS	Leu	Ser	Asp	Asn	Ile	Ile	Ser	Gly	Schilling & Overall, 2008
-LSDLLAP	LSDL	1627	20.76			malate dehydrogenase, mitochondrial precursor	P40926	323-338	KAS+IKKGEDFVKTLK	N	MS	-	Lys	Ala	Ser	Ile	Lys	Lys	Gly	Schilling & Overall, 2008
LSDNIISG	SDNI	47839	0.13			ATP-citrate synthase	P53396	42-64	peptide-Asn54+Leu-peptide	N	MS	Leu	Ser	Gln	Asn	Leu	Val	Val	Lys	Schilling & Overall, 2008
LSGHLETV	SGHL	13513	1.46			annexin A2 isoform 2	P07355-2	106-122	SA+LSGHLETVILGLLK	N	MS	-	-	Ser	Ala	Leu	Ser	Gly	His	Schilling & Overall, 2008
LSHLTAEG	SHLT	18138	0.82			heat shock 70 kDa protein 1	P08107	384-415	peptide-Gly402+Leu-peptide	N	MS	Leu	Ser	Leu	Gly	Leu	Glu	Thr	Ala	Schilling & Overall, 2008
LSLGLETA	SLGL	8129	4.25			heat shock 70 kDa protein 1L	P34931	389-417	peptide-Gly404+Leu-peptide	N	MS	Leu	Ser	Leu	Gly	Leu	Glu	Thr	Ala	Schilling & Overall, 2008
-LSNIVKT	LSNI	647	27.07			adenylyl cyclase-associated protein 1	Q01518	100-113	LSD+LLAPISEQIK	N	MS	-	Leu	Ser	Asp	Leu	Leu	Ala	Pro	Schilling & Overall, 2008
LSQNLVVK	SQNL	5064	9.61			Prefoldin subunit 2	O70591	1-154	peptide-Gln107+Leu-peptide	N	MS	Leu	Ser	Gln	Gln	Leu	Gln	Ala	Lys	Prudova et al., 2010
LSQQLQAK	SQQL	75869	0.04			annexin A2 isoform 2	P07355-2	106-122	SALSGH+LETVILGLLK	N	MS	Leu	Ser	Gly	His	Leu	Glu	Thr	Val	Schilling & Overall, 2008
LSSEMNTS	SSEM	93297	0			transmembrane protein 43	Q9BTV4	189-204	FFLSSG+LIDKVDNFK	N	MS	Leu	Ser	Ser	Gly	Leu	Ile	Asp	Lys	Schilling & Overall, 2008
LSSGLIDK	SSGL	5252	9.22			Polyadenylate-binding protein 1	P29341	1-636	peptide-Ser548+Met-peptide	N	MS	Leu	Thr	Ala	Ser	Met	Leu	Ala	Ser	auf dem Keller et al., 2010
LTASMLAS	TASM	4597	10.84			Flavin reductase	Q923D2	2-206	peptide-Ala162+Tyr-peptide	N	MS	Leu	Thr	Gly	Ala	Tyr	Thr	Val	Thr	auf dem Keller et al., 2010
LTGAYTVT	TGAY	8322	4.03			brevican core protein precursor	P55068	23-833	peptide-Thr599+Ser-peptide	P		Leu	Thr	Gly	Thr	Ser	Val	Gln	Ala	Nakamura et al., 2001	18223
LTGTSVQA	TGTS	59932	0.08			tubulin beta-4 chain	P04350	122-154	peptide-Ser138+Leu-peptide	N	MS	Leu	Thr	His	Ser	Leu	Gly	Gly	Gly	Schilling & Overall, 2008
LTHSLGGG	THSL	34822	0.24			cDNA, FLJ95457, highly similar to Homo sapiens tubulin, beta, 4	B2RBD5	122-154	peptide-Ser138+Leu-peptide	N	MS	Leu	Thr	His	Ser	Leu	Gly	Gly	Gly	Schilling & Overall, 2008
LVAAMQHF	VAAM	257	31.14			importin subunit beta-1	Q14974	105-147	peptide-Asn136+Val-peptide	N	MS	Leu	Val	Ala	Asn	Val	Thr	Asn	Pro	Schilling & Overall, 2008
LVANVTNP	VANV	1562	21.02			Galectin-1	P16045	2-135	peptide-Ser8+Asn-peptide	N	MS	Leu	Val	Ala	Ser	Asn	Leu	Asn	Leu	auf dem Keller et al., 2010
LVASLAEP	VASL	97	33.08			14-3-3 protein epsilon	P62259	1-255	peptide-Tyr152+Lys-peptide	N	MS	Leu	Val	Ala	Tyr	Lys	Ala	Ala	Ser	auf dem Keller et al., 2010
LVASNLNL	VASN	15418	1.13			ubiquitin-like modifier-activating enzyme 1	P22314	304-322	SLVAS+LAEPDFVVTDFAK	N	MS	Leu	Val	Ala	Ser	Leu	Ala	Glu	Pro	Schilling & Overall, 2008
LVAYKAAS	VAYK	52946	0.1			ATP synthase subunit beta, mitochondrial	P56480	47-529	peptide-Gly122+Gln-peptide	N	MS	Leu	Val	Arg	Gly	Gln	Lys	Val	Leu	Kleifeld et al., 2010
LVETMKSG	VETM	107553	0			endoplasmin	P14625	158-173	LVKN+LGTIAKSGTSE	N	MS	Leu	Val	Lys	Asn	Leu	Gly	Thr	Ile	Schilling & Overall, 2008
LVKNLGTI	VKNL	1971	19.17			Aldose reductase	P45376	2-316	peptide-Thr156+Ile-peptide	N	MS	Leu	Val	Lys	Thr	Ile	Gly	Val	Ser	auf dem Keller et al., 2010
LVKTIGVS	VKTI	54586	0.09			tubulin beta-4 chain	P04350	223-241	DLNHLVSA+TMSGVTTCLR	N	MS	Leu	Val	Ser	Ala	Thr	Met	Ser	Gly	Schilling & Overall, 2008
LVNAMFFK	VNAM	6819	6.05			rheumatoid arthritis related antigen RA-A47	Q9NPA9	88-107	TDGALLVNA+MFFKPHWDEK	N	MS	Leu	Val	Asn	Ala	Met	Phe	Phe	Lys	Schilling & Overall, 2008
LVQAFQFT	VQAF	2972	15.31			peroxiredoxin-1	Q06830	155-171	TLR+LVQAFQFTDKHGE	N	MS	-	Thr	Leu	Arg	Leu	Val	Gln	Ala	Schilling & Overall, 2008
LVQCIQNK	VQCI	103115	0			annexin A2	Q8TBV2	249-273	peptide-Cys262+Ile-peptide	N	MS	Leu	Val	Gln	Cys	Ile	Gln	Asn	Lys	Schilling & Overall, 2008
LVQRLVTI	VQRL	3803	12.93			annexin A2 isoform 2	P07355-2	267-291	peptide-Cys280+Ile-peptide	N	MS	Leu	Val	Gln	Cys	Ile	Gln	Asn	Lys	Schilling & Overall, 2008
LVRGQKVL	VRGQ	3007	15.24			cDNA FLJ78501, highly similar to Homo sapiens serpin peptidase inhibitor, clade H	A8K259	194-213	TDGALLVNA+MFFKPHWDEK	N	MS	Leu	Val	Asn	Ala	Met	Phe	Phe	Lys	Schilling & Overall, 2008
LVSATMSG	VSAT	43487	0.16			tubulin beta-4 chain	P04350	223-241	DLNH+LVSATMSGVTTCLR	N	MS	Asp	Leu	Asn	His	Leu	Val	Ser	Ala	Schilling & Overall, 2008
LVSGWVKP	VSGW	1271	22.73			splicing factor 3 subunit 1	Q15459	399-424	peptide-Pro414+Ile-peptide	N	MS	Leu	Val	Ser	Pro	Ile	Thr	Gly	Glu	Schilling & Overall, 2008
LVSNISAC	VSNI	558	27.98			chaperonin containing TCP1, subunit 7	Q53HV2	1937-10-01	peptide-Asn25+Ile-peptide	N	MS	Leu	Val	Ser	Asn	Ile	Ser	Ala	Cys	Schilling & Overall, 2008
LVSPITGE	VSPI	1413	21.9			ATP-citrate synthase	P53396	918-934	DLVSS+LTSGLLTIGDR	N	MS	Leu	Val	Ser	Ser	Leu	Thr	Ser	Gly	Schilling & Overall, 2008
LVSSLTSG	VSSL	437	29.09			gamma-enolase	P09104	383-402	LVVG+LCTGQIKTGAPCRSE	N	MS	Leu	Val	Val	Gly	Leu	Cys	Thr	Gly	Schilling & Overall, 2008
LVVGLCTG	VVGL	2207	18.15			beta-enolase	P13929	383-402	LVVG+LCTGQIKTGAPCRSE	N	MS	Leu	Val	Val	Gly	Leu	Cys	Thr	Gly	Schilling & Overall, 2008
LWLNLTDG	WLNL	49073	0.12			actin, cytoplasmic 1	P60709	291-312	peptide-Asn296+Thr-peptide	N	MS	Leu	Tyr	Ala	Asn	Thr	Val	Leu	Ser	Schilling & Overall, 2008
LYANTVLS	YANT	74284	0.04			actin, cytoplasmic 2	P63261	291-312	peptide-Asn296+Thr-peptide	N	MS	Leu	Tyr	Ala	Asn	Thr	Val	Leu	Ser	Schilling & Overall, 2008
LYMKARPF	YMKA	10082	2.65			BAG family molecular chaperone regulator 2	O95816	132-154	peptide-Ala141+Cys-peptide	N	MS	Leu	Tyr	Ser	Ala	Cys	Ser	Ser	Glu	Schilling & Overall, 2008
LYSACSSE	YSAC	68527	0.05			cDNA, FLJ93329, Homo sapiens importin 7	B2R786	167-182	SPLVAA+MQHFLPVLK	N	MS	Leu	Val	Ala	Ala	Met	Gln	His	Phe	Schilling & Overall, 2008
MAAAMKAV	AAAM	1165	23.42			14-3-3 protein gamma	P61982	2-247	peptide-Ala26+Met-peptide	N	MS	Met	Ala	Ala	Ala	Met	Lys	Asn	Val	auf dem Keller et al., 2010
MAAAMKNV	AAAM	1165	23.42			14-3-3 protein zeta/delta	P63101	1-245	peptide-Cys25+Met-peptide	N	MS	Met	Ala	Ala	Cys	Met	Lys	Ser	Val	auf dem Keller et al., 2010
MAACMKSV	AACM	102972	0			Exosome complex exonuclease RRP43	Q9D753	1-276	Met-Ala-Ala-Gly4+Phe-peptide	N	MS	Met	Ala	Ala	Gly	Phe	Lys	Thr	Val	auf dem Keller et al., 2010
MAAGFKTV	AAGF	2923	15.45			inosine triphosphate pyrophosphatase	Q9BY32	2020-01-22	peptide-Ser4+Leu-peptide	N	MS	Met	Ala	Ala	Ser	Leu	Val	Gly	Lys	Schilling & Overall, 2008
MAASLVGK	AASL	436	29.09			protein TFG	Q92734	155-179	peptide-Ser164+Met-peptide	N	MS	Met	Ala	Ala	Ser	Met	Ser	Ala	Phe	Schilling & Overall, 2008
MAASMSAF	AASM	1545	21.11			tyrosine-protein kinase receptor	Q8TDJ5	155-179	peptide-Ser164+Met-peptide	N	MS	Met	Ala	Ala	Ser	Met	Ser	Ala	Phe	Schilling & Overall, 2008
MAATFIGN	AATF	56368	0.09			adenosylhomocysteinase	P23526	166-186	MMANG+ILKVPAINVNDSVTK	N	MS	Met	Ala	Asn	Gly	Ile	Leu	Lys	Val	Schilling & Overall, 2008
MACAISIL	ACAI	27799	0.37			plectin	Q9QXS1	4691-01-01	peptide-Gln2501+Leu-peptide	N	MS	Met	Ala	Gln	Gln	Leu	Val	Glu	Glu	Kleifeld et al., 2010
MANFLKGA	ANFL	8421	3.92			fascin-3	Q9NQT6	336-377	peptide-Val370+Ile-peptide	N	MS	Met	Ala	Asn	Val	Ile	Leu	Pro	Gly	Schilling & Overall, 2008
MANGILKV	ANGI	42917	0.16			Drebrin-like protein	Q62418	1-436	peptide-Phe107+Leu-peptide	N	MS	Met	Ala	Asn	Phe	Leu	Lys	Gly	Ala	Prudova et al., 2010
MANVILPG	ANVI	47023	0.13			L-lactate dehydrogenase B chain	P07195	16-48	peptide-Ala37+Ile-peptide	N	MS	Met	Ala	Cys	Ala	Ile	Ser	Ile	Leu	Schilling & Overall, 2008
MAQQLVEE	AQQL	15572	1.11			14-3-3 protein eta	P68510	2-246	peptide-Ala26+Met-peptide	N	MS	Met	Ala	Ser	Ala	Met	Lys	Ala	Val	auf dem Keller et al., 2010
MASAMKAV	ASAM	1315	22.45			Hematological and neurological-expressed 1-like protein	A6NGP5	1-178	MASN+IFGPTEEPQNIPK	N	MS	Met	Ala	Ser	Asn	Ile	Phe	Gly	Pro	Schilling & Overall, 2008
MASGVAVS	ASGV	34862	0.24			14-3-3 protein theta	P68254	1-245	peptide-Cys25+Met-peptide	N	MS	Met	Ala	Thr	Cys	Met	Lys	Ala	Val	Kleifeld et al., 2010
-MASLFKK	MASL	214	31.68			cDNA, FLJ95045, highly similar to Homo sapiens vesicle docking protein p115	B2RAQ0	2020-01-19	MNF+LRGVMGGQSAGPQHTE	N	MS	-	Met	Asn	Phe	Leu	Arg	Gly	Val	Schilling & Overall, 2008
MASNIFGP	ASNI	2102	18.59			Hematological and neurological expressed 1-like protein	Q6PGH2	1-190	peptide-Asn46+Ile-peptide	N	MS	Met	Ala	Ser	Asn	Ile	Phe	Gly	Pro	Prudova et al., 2010
MATCMKAV	ATCM	129548	0			Tubulin beta-5 chain	P99024	1-444	peptide-Thr366+Phe-peptide	N	MS	Met	Ala	Val	Thr	Phe	Ile	Gly	Asn	auf dem Keller et al., 2010
MAVTFIGN	AVTF	112532	0			Coiled-coil domain-containing protein 124	Q9D8X2	1-217	peptide-Ala166+Phe-peptide	N	MS	Met	Arg	Ala	Ala	Phe	Thr	Ala	Phe	auf dem Keller et al., 2010
MEAEMIQL	EAEM	138013	0			myosin-9	P35579	1676-1694	SMEAE+MIQLQEELAAAER	N	MS	Met	Glu	Ala	Glu	Met	Ile	Gln	Leu	Schilling & Overall, 2008
-MEDLMSS	MEDL	141540	0			myosin-9	P35579	1505-1518	MED+LMSSKDDVGK	N	MS	-	Met	Glu	Asp	Leu	Met	Ser	Ser	Schilling & Overall, 2008
-MEQLNGI	MEQL	20470	0.66			Proteasome subunit beta type-2	Q9R1P3	1-201	Met-Glu-Tyr3+Leu-peptide	N	MS	-	Met	Glu	Tyr	Leu	Ile	Gly	Ile	auf dem Keller et al., 2010
-MEYLIGI	MEYL	10508	2.42			histone H2B type 1-H	Q93079	59-73	MGI+MNSFVNDIFER	N	MS	-	Met	Gly	Ile	Met	Asn	Ser	Phe	Schilling & Overall, 2008
MFGCLVAG	FGCL	16313	1.01			Ubiquitin carboxyl-terminal hydrolase 5	P56399	2-858	peptide-Ala419+Leu-peptide	N	MS	Met	Phe	Lys	Ala	Leu	Ile	Gly	Lys	auf dem Keller et al., 2010
MFGCQVEG	FGCQ	146879	0			uncharacterized protein C11orf73	Q53FT3	2020-01-20	MFGC+LVAGRLVQTAAQQVAE	N	MS	Met	Phe	Gly	Cys	Leu	Val	Ala	Gly	Schilling & Overall, 2008
MFKALIGK	FKAL	8011	4.4			Serine/threonine-protein phosphatase 2A 65 kDa regulatory subunit A alpha isoform	Q76MZ3	2-589	peptide-Asn211+Leu-peptide	N	MS	Met	Phe	Ser	Asn	Leu	Ala	Ser	Asp	auf dem Keller et al., 2010
MFSNLASD	FSNL	1086	24			Protein Red	Q9Z1M8	1-557	peptide-Glu63+Tyr-peptide	N	MS	Met	Pro	Arg	Glu	Tyr	Asn	Glu	Asp	auf dem Keller et al., 2010
MGAALTGA	GAAL	2850	15.72			Heat shock protein HSP 90-alpha	P07901	2-733	peptide-Met629+Ala-peptide	N	MS	Met	Gly	Tyr	Met	Ala	Ala	Lys	Lys	Prudova et al., 2010
--MGIMNS	-MGI					histone H2B type F-S	P57053	59-73	MG+IMNSFVNDIFER	N	MS	-	-	Met	Gly	Ile	Met	Asn	Ser	Schilling & Overall, 2008
-MGIMNSF	MGIM	28765	0.35			histone H2B type 1-L	Q99880	59-73	MGI+MNSFVNDIFER	N	MS	-	Met	Gly	Ile	Met	Asn	Ser	Phe	Schilling & Overall, 2008
MGYMAAKK	GYMA	13305	1.5			Ser-Gly-His-Met-His-Ala-Ala-Leu-Thr-Ala			Ser-Gly-His-Met-His-Ala-Ala+Leu-Thr-Ala	N		Met	His	Ala	Ala	Leu	Thr	Ala	-	Murphy, 2004
MHAALTA-	HAAL	413	29.25			serine/threonine-protein phosphatase 5	P53041	347-367	VLIMHGG+LFSEDGVTLDDIR	N	MS	Met	His	Gly	Gly	Leu	Phe	Ser	Glu	Schilling & Overall, 2008
MHGGLFSE	HGGL	3015	15.21			serine/threonine protein phosphatase	Q59F46	170-190	VLIMHGG+LFSEDGVTLDDIR	N	MS	Met	His	Gly	Gly	Leu	Phe	Ser	Glu	Schilling & Overall, 2008
MHKALTA-	HKAL	9160	3.3			cDNA, FLJ92657, highly similar to Homo sapiens heterogeneous nuclear ribonucleoprotein C	B2R5W2	73-89	MIAG+QVLDINLAAEPK	N	MS	Met	Ile	Ala	Gly	Gln	Val	Leu	Asp	Schilling & Overall, 2008
MIAGQVLD	IAGQ	3012	15.22			putative uncharacterized protein	Q3U6P5	1-334	peptide-Gly77+Gln-peptide	N	MS	Met	Ile	Ala	Gly	Gln	Val	Leu	Asp	Kleifeld et al., 2010
MIDNLLSP	IDNL	7609	4.88			protein diaphanous homolog 1 isoform 2	O60610-2	1-1248	SMIQN+LIKQMPEPE	N	MS	Met	Ile	Gln	Asn	Leu	Ile	Lys	Gln	Schilling & Overall, 2008
MIKPFFHS	IKPF	7627	4.86			Polyadenylate-binding protein 1	P29341	1-636	peptide-Ser552+Ala-peptide	N	MS	Met	Leu	Ala	Ser	Ala	Pro	Pro	Gln	Prudova et al., 2010
MIQNLIKQ	IQNL	590	27.59			thioredoxin	P10599	36-48	MIKP+FFHSLSEK	N	MS	Met	Ile	Lys	Pro	Phe	Phe	His	Ser	Schilling & Overall, 2008
MKKNLEAQ	KKNL	38170	0.2			laminin subunit gamma-1	P02468	34-1607	peptide-Gly1488+Met-peptide	P	MS	Met	Met	Ala	Gly	Met	Ala	Ser	Gln	Doucet & Overall, 2010
MLASAPPQ	LASA	6373	6.87			Dha kinase/FMN cyclase splice variant	Q2L9C1	493-510	TMLDS+LWAAGQELQAWK	N	MS	Met	Leu	Asp	Ser	Leu	Trp	Ala	Ala	Schilling & Overall, 2008
MLDSLWAA	LDSL	7919	4.51			putative uncharacterized protein DKFZp586B1621	Q9UFX5	83-100	TMLDS+LWAAGQELQAWK	N	MS	Met	Leu	Asp	Ser	Leu	Trp	Ala	Ala	Schilling & Overall, 2008
MLGEALSK	LGEA	76420	0.04			Cytosolic non-specific dipeptidase	Q9D1A2	1-475	peptide-Pro436+Val-peptide	N	MS	Met	Leu	Leu	Pro	Val	Gly	Ser	Ala	auf dem Keller et al., 2010
MLLPVGSA	LLPV	24818	0.46			golgin subfamily B member 1	Q14789	2020-01-15	MLSR+LSGLANVVLHE	N	MS	Met	Leu	Ser	Arg	Leu	Ser	Gly	Leu	Schilling & Overall, 2008
MLSGETAK	LSGE	60272	0.08			Pyruvate kinase isozymes M1/M2	P52480	2-531	peptide-Gly363+Glu-peptide	N	MS	Met	Leu	Ser	Gly	Glu	Thr	Ala	Lys	auf dem Keller et al., 2010
MLSHQLKQ	LSHQ	2474	17.08			PA2G4 protein	Q05D08	214-228	MLSH+QLKQHVIDGE	N	MS	Met	Leu	Ser	His	Gln	Leu	Lys	Gln	Schilling & Overall, 2008
MLSMLFNQ	LSML	1616	20.82			Septin-7	O55131	1-436	peptide-Asn388+Leu-peptide	N	MS	Met	Lys	Lys	Asn	Leu	Glu	Ala	Gln	auf dem Keller et al., 2010
MLSNMISF	LSNM	339	30.09			pyruvate kinase	Q504U3	177-211	peptide-Gly198+Glu-peptide	N	MS	Met	Leu	Ser	Gly	Glu	Thr	Ala	Lys	Schilling & Overall, 2008
MLSRLSGL	LSRL	3325	14.33			V-type proton ATPase catalytic subunit A	P50516-1	1-617	peptide-Asn543+Met-peptide	N	MS	Met	Leu	Ser	Asn	Met	Ile	Ser	Phe	auf dem Keller et al., 2010
MMAGMASQ	MAGM	1484	21.45			heat shock protein HSP 90-beta	P11499	2-724	peptide-Lys623+Lys-peptide	N	MS	Met	Met	Ala	Lys	Lys	His	Leu	Glu	Kleifeld et al., 2010
MMAKKHLE	MAKK	83227	0			dual specificity mitogen-activated protein kinase kinase 1	Q02750	269-291	peptide-Cys277+Gln-peptide	N	MS	Met	Phe	Gly	Cys	Gln	Val	Glu	Gly	Schilling & Overall, 2008
-MNFLRGV	MNFL	4698	10.59			General vesicular transport factor p115 isoform 2	O60763-2	2020-01-19	MNF+LRGVMGGQSAGPQHTE	N	MS	-	Met	Asn	Phe	Leu	Arg	Gly	Val	Schilling & Overall, 2008
MPCGIMDQ	PCGI	3517	13.76			cDNA FLJ26554 fis, clone LNF01773, highly similar to Galactokinase	Q6ZP37	265-294	peptide-Gly282+Ile-peptide	N	MS	Met	Pro	Cys	Gly	Ile	Met	Asp	Gln	Schilling & Overall, 2008
MPFPVNHG	PFPV	8182	4.18			Myosin-9 isoform 3	P35579-2	2020-07-23	HEMPPH+IYAITDTAYR	N	MS	Met	Pro	Pro	His	Ile	Tyr	Ala	Ile	Schilling & Overall, 2008
MPLPRKAP	PLPR	35744	0.23			ubiquitinyl hydrolase-L1	P09936	178-195	MPFP+VNHGASSEDTLLK	N	MS	Met	Pro	Phe	Pro	Val	Asn	His	Gly	Schilling & Overall, 2008
MPPHIYAI	PPHI	112751	0			myosin-9	P35579	143-159	HEMPPH+IYAITDTAYR	N	MS	Met	Pro	Pro	His	Ile	Tyr	Ala	Ile	Schilling & Overall, 2008
MPREYNED	PREY	891	25.16			Galectin-3	P16110	2-264	peptide-Met144+Leu-peptide	N	MS	Met	Pro	Arg	Met	Leu	Ile	Thr	Ile	auf dem Keller et al., 2010
MPRMLITI	PRML	297	30.6			galactokinase	P51570	166-195	peptide-Gly183+Ile-peptide	N	MS	Met	Pro	Cys	Gly	Ile	Met	Asp	Gln	Schilling & Overall, 2008
MPSDKTIG	PSDK	118742	0			Glutathione synthetase	P51855	2-474	peptide-Gln274+Tyr-peptide	N	MS	Met	Pro	Ser	Gln	Tyr	Asn	Ser	Gln	auf dem Keller et al., 2010
MPSQYNSQ	PSQY	1085	24			Tubulin beta-2C chain	P68372	1-445	peptide-Thr366+Phe-peptide	N	MS	Met	Ser	Ala	Thr	Phe	Ile	Gly	Asn	auf dem Keller et al., 2010
MQRNLVVI	QRNL	5822	8			Myosin-9 isoform 3	P35579-2	1098-1116	SMEAE+MIQLQEELAAAER	N	MS	Met	Glu	Ala	Glu	Met	Ile	Gln	Leu	Schilling & Overall, 2008
MRAAFTAF	RAAF	12709	1.64			aldose reductase	P15121	249-274	peptide-Asn257+Leu-peptide	N	MS	Met	Gln	Arg	Asn	Leu	Val	Val	Ile	Schilling & Overall, 2008
-MSALKAV	MSAL	289	30.71			SH3 domain-binding glutamic acid-rich-like protein 3	Q9H299	2020-01-16	MSG+LRVYSTSVTGSRE	N	MS	-	Met	Ser	Gly	Leu	Arg	Val	Tyr	Schilling & Overall, 2008
MSATFIGN	SATF	109592	0			eukaryotic translation elongation factor 1 gamma	Q53YD7	327-348	peptide-Asn340+Leu-peptide	N	MS	Met	Ser	Cys	Asn	Leu	Ile	Thr	Gly	Schilling & Overall, 2008
MSCNLITG	SCNL	28140	0.36			Heat shock protein HSP 90-alpha	P07901	2-733	peptide-Ile33+Ile-peptide	N	MS	Met	Ser	Leu	Ile	Ile	Asn	Thr	Phe	auf dem Keller et al., 2010
-MSGLRVY	MSGL	1034	24.3			putative uncharacterized protein	Q86Z22	133-149	MSG+LRVYSTSVTGSRE	N	MS	-	Met	Ser	Gly	Leu	Arg	Val	Tyr	Schilling & Overall, 2008
-MSLIINT	MSLI	17006	0.93			heat shock protein 90Bd	Q58FF6	2020-01-13	MSL+IINTFYSNKE	N	MS	-	Met	Ser	Leu	Ile	Ile	Asn	Thr	Schilling & Overall, 2008
MSLIINTF	SLII	35955	0.23			biliverdin reductase A precursor	P53004	92-117	peptide-Ser103+Leu-peptide	N	MS	Met	Thr	Leu	Ser	Leu	Ala	Ala	Ala	Schilling & Overall, 2008
MTLSLAAA	TLSL	35573	0.23			Polypyrimidine tract-binding protein 1	P17225	1-527	peptide-Tyr112+Tyr-peptide	N	MS	Met	Val	Asn	Tyr	Tyr	Thr	Ser	Val	auf dem Keller et al., 2010
MVESMKKV	VESM	9342	3.17			actin, gamma-enteric smooth muscle	P63267	32-66	peptide-Met48+Gly-peptide	N	MS	Met	Val	Gly	Met	Gly	Gln	Lys	Asp	Schilling & Overall, 2008
MVGMGQKD	VGMG	48777	0.12			actin, aortic smooth muscle	P62736	33-67	peptide-Met49+Gly-peptide	N	MS	Met	Val	Gly	Met	Gly	Gln	Lys	Asp	Schilling & Overall, 2008
MVGSMVGV	VGSM	1162	23.47			Amyloid-like protein 2	Q06335	30-695	peptide-Ala384+Leu-peptide	N	MS	Met	Val	Lys	Ala	Leu	Glu	Lys	Glu	auf dem Keller et al., 2010
MVKALEKE	VKAL	1471	21.52			Ubiquitin-like modifier-activating enzyme 1	Q02053	1-1058	peptide-Met223+Val-peptide	N	MS	Met	Val	Ser	Met	Val	Thr	Lys	Asp	auf dem Keller et al., 2010
MVNYYTSV	VNYY	13256	1.51			glutathione synthetase	P48637	378-391	MVQA+LKQLKDSEE	N	MS	Met	Val	Gln	Ala	Leu	Lys	Gln	Leu	Schilling & Overall, 2008
MVQALKQL	VQAL	613	27.42			vesicle-associated membrane protein-associated protein A	Q9P0L0	94-114	FMVQT+IFAPPNTSDMEAVWK	N	MS	Met	Val	Gln	Thr	Ile	Phe	Ala	Pro	Schilling & Overall, 2008
MVQTIFAP	VQTI	7158	5.49			14-3-3 protein epsilon	P62259	1-255	peptide-Ser26+Met-peptide	N	MS	Met	Val	Glu	Ser	Met	Lys	Lys	Val	auf dem Keller et al., 2010
MVSMVTKD	VSMV	20824	0.64			nucleolar complex protein 3 homolog	Q8WTT2	706-729	peptide-His710+Leu-peptide	N	MS	Phe	Ala	Ala	His	Leu	Ile	Ala	Gly	Schilling & Overall, 2008
-NAHIKGV	NAHI	54321	0.1			PDZ and LIM domain protein 1	O00151	159-179	NNA+LESKTAASGVEANSRPL	N	MS	-	Asn	Asn	Ala	Leu	Glu	Ser	Lys	Schilling & Overall, 2008
NALAIQVD	ALAI	3188	14.71			transitional endoplasmic reticulum ATPase	P55072	295-312	NAPA+IIFIDELDAIAPK	N	MS	Asn	Ala	Pro	Ala	Ile	Ile	Phe	Ile	Schilling & Overall, 2008
NAPAIIFI	APAI	28173	0.36			acetyl-CoA acetyltransferase, cytosolic	Q9BWD1	235-265	peptide-Gly253+Ile-peptide	N	MS	Asn	Ala	Ser	Gly	Ile	Asn	Asp	Gly	Schilling & Overall, 2008
NARGLTSV	ARGL	785	25.95			SNW domain-containing protein 1	Q9CSN1	2-536	peptide-Ala87+Ile-peptide	N	MS	Asn	Ala	Leu	Ala	Ile	Gln	Val	Asp	auf dem Keller et al., 2010
NASGINDG	ASGI	3515	13.76			voltage-dependent anion-selective channel protein 1	P21796	236-256	VNNSS+LIGLGYTQTLKPGIK	N	MS	Asn	Asn	Ser	Ser	Leu	Ile	Gly	Leu	Schilling & Overall, 2008
--NDLISH	-NDL					histone H4	P62805	24-36	DN+IQGITKPAIR	N	MS	-	-	Asp	Asn	Ile	Gln	Gly	Ile	Schilling & Overall, 2008
NDPDLLPN	DPDL	146012	0			protein disulfide-isomerase precursor	P07237	230-247	HNQLP+LVIEFTEQTAPK	N	MS	Asn	Gln	Leu	Pro	Leu	Val	Ile	Glu	Schilling & Overall, 2008
NEKRLEAG	EKRL	116581	0			Actin, cytoplasmic 1	P60710	1-375	peptide-Gly15+Met-peptide	N	MS	Asn	Gly	Ser	Gly	Met	Cys	Lys	Ala	auf dem Keller et al., 2010
NFRALSTG	FRAL	5175	9.38			COP9 signalosome complex subunit 3	Q9UNS2	366-382	YNNPAM+LHNIDQEMLK	N	MS	Asn	Pro	Ala	Met	Leu	His	Asn	Ile	Schilling & Overall, 2008
NGSGMCKA	GSGM	42993	0.16			Spliceosome RNA helicase Bat1	Q9Z1N5	2-428	peptide-Phe360+Asn-peptide	N	MS	Asn	Ile	Ala	Phe	Asn	Tyr	Asp	Met	auf dem Keller et al., 2010
-NHALKVS	NHAL	82763	0			rhabdomyosarcoma antigen MU-RMS-4012.	Q3BDU5	280-296	NSN+LVGAAHEELQQSR	N	MS	-	Asn	Ser	Asn	Leu	Val	Gly	Ala	Schilling & Overall, 2008
NIAFNYDM	IAFN	17642	0.87			uncharacterized protein LOC391356	Q6GMV3	113-128	NIAT+CIALRPYPKEE	N	MS	Asn	Ile	Ala	Thr	Cys	Ile	Ala	Leu	Schilling & Overall, 2008
NIATCIAL	IATC	113136	0			Protein regulator of cytokinesis 1	O43663	1-620	NIAT+LQKLLRQLE	N	MS	Asn	Ile	Ala	Thr	Leu	Gln	Lys	Leu	Schilling & Overall, 2008
NIATLQKL	IATL	1043	24.28			trifunctional enzyme subunit beta, mitochondrial precursor	P55084	46-64	AKPNIRN+VVVVDGVRTPF	N	MS	Asn	Ile	Arg	Asn	Val	Val	Val	Val	Schilling & Overall, 2008
NICQQVNI	ICQQ	142009	0			histone H4	P62805	24-36	DNIQG+ITKPAIR	N	MS	Asn	Ile	Gln	Gly	Ile	Thr	Lys	Pro	Schilling & Overall, 2008
NIKALRTD	IKAL	2038	18.88			General transcription factor IIF subunit 1	Q3THK3	2-508	peptide-Ala30+Phe-peptide	N	MS	Asn	Ile	Met	Ala	Phe	Asn	Ala	Ala	auf dem Keller et al., 2010
NIMAFNAA	IMAF	15075	1.19			cDNA FLJ77695, highly similar to Homo sapiens chaperonin containing TCP1, subunit 7	A8K7E6	1937-10-01	peptide-Ala28+Cys-peptide	N	MS	Asn	Ile	Ser	Ala	Cys	Gln	Val	Ile	Schilling & Overall, 2008
NIQGITKP	IQGI	3485	13.83			putative uncharacterized protein	Q8BT23	1997-01-01	peptide-Ala67+Leu-peptide	N	MS	Asn	Ile	Lys	Ala	Leu	Arg	Thr	Asp	Kleifeld et al., 2010
NIRKLFAD	IRKL	24872	0.46			eukaryotic translation initiation factor 3 subunit A	Q14152	74-93	KNICQ+QVNIKSLEDVVRAY	N	MS	Asn	Ile	Cys	Gln	Gln	Val	Asn	Ile	Schilling & Overall, 2008
NIRNVVVV	IRNV	8122	4.25			Vesicle-fusing ATPase	P46460	1-744	peptide-Lys304+Leu-peptide	N	MS	Asn	Ile	Arg	Lys	Leu	Phe	Ala	Asp	auf dem Keller et al., 2010
NISACQVI	ISAC	69509	0.05			chaperonin containing TCP1, subunit 7	Q53HV2	1937-10-01	peptide-Ala28+Cys-peptide	N	MS	Asn	Ile	Ser	Ala	Cys	Gln	Val	Ile	Schilling & Overall, 2008
NISDLTA-	ISDL	1461	21.56			elongation factor 2	P13639	456-481	peptide-Gly471+Leu-peptide	N	MS	Asn	Ile	Val	Gly	Leu	Val	Gly	Val	Schilling & Overall, 2008
NIVGLVGV	IVGL	3866	12.76			Septin-2	P42208	1-361	peptide-Pro179+Val-peptide	N	MS	Asn	Ile	Val	Pro	Val	Ile	Ala	Lys	auf dem Keller et al., 2010
NIVPVIAK	IVPV	57041	0.09			bifunctional aminoacyl-tRNA synthetase	P07814	1020-1034	EENLAD+WYSQVITK	N	MS	Asn	Leu	Ala	Asp	Trp	Tyr	Ser	Gln	Schilling & Overall, 2008
NKLNLQNK	KLNL	10838	2.27			cDNA FLJ77824, highly similar to Homo sapiens RAB1B, member RAS oncogene family	A8K7S1	118-139	peptide-Asp124+Leu-peptide	N	MS	Asn	Lys	Ser	Asp	Leu	Thr	Thr	Lys	Schilling & Overall, 2008
NKSDLTTK	KSDL	1633	20.75			laminin subunit alpha-1	P19137	25-3084	peptide-Ser2222+Leu-peptide	P	MS	Asn	Met	Gly	Ser	Leu	Ser	Val	Lys	Doucet & Overall, 2010
NLADWYSQ	LADW	3585	13.54			multisynthetase complex auxiliary component p38	Q13155	307-320	NLAP+FNTALKLLK	N	MS	Asn	Leu	Ala	Pro	Phe	Asn	Thr	Ala	Schilling & Overall, 2008
NLAPFNTA	LAPF	2249	17.99			ubiquilin-2	Q9UHD9	597-617	EANLQA+LIATGGDINAAIER	N	MS	Asn	Leu	Gln	Ala	Leu	Ile	Ala	Thr	Schilling & Overall, 2008
NLEALQKK	LEAL	4051	12.3			Nucleoside diphosphate kinase B	Q01768	2-152	peptide-Arg6+Thr-peptide	N	MS	Asn	Leu	Glu	Arg	Thr	Phe	Ile	Ala	auf dem Keller et al., 2010
NLEGYVGF	LEGY	42389	0.16			NNMT protein	Q6FH49	181-200	NLGS+LLKPGGFLVIMDALK	N	MS	Asn	Leu	Gly	Ser	Leu	Leu	Lys	Pro	Schilling & Overall, 2008
NLERTFIA	LERT	129354	0			Septin-7	O55131	1-436	peptide-Gly28+Tyr-peptide	N	MS	Asn	Leu	Glu	Gly	Tyr	Val	Gly	Phe	auf dem Keller et al., 2010
NLGSLLKP	LGSL	445	28.98			heat shock protein beta	O14942	48-66	LINNLGT+IAKSGTKAFME	N	MS	Asn	Leu	Gly	Thr	Ile	Ala	Lys	Ser	Schilling & Overall, 2008
NLGTIAKS	LGTI	3514	13.77			putative heat shock protein HSP 90-alpha A2	Q14568	102-120	LINNLGT+IAKSGTKAFME	N	MS	Asn	Leu	Gly	Thr	Ile	Ala	Lys	Ser	Schilling & Overall, 2008
NLQALIAT	LQAL	584	27.71			ubiquilin-4	Q9NRR5	574-594	EANLQA+LIATGGDINAAIER	N	MS	Asn	Leu	Gln	Ala	Leu	Ile	Ala	Thr	Schilling & Overall, 2008
NLQDFVGK	LQDF	44746	0.15			Proliferating cell nuclear antigen	P17918	1-261	peptide-Ser39+Met-peptide	N	MS	Asn	Leu	Gln	Ser	Met	Asp	Ser	Ser	auf dem Keller et al., 2010
NLQSMDSS	LQSM	1481	21.46			Dual specificity mitogen-activated protein kinase kinase 1	P31938	2-393	peptide-Ala32+Leu-peptide	N	MS	Asn	Leu	Glu	Ala	Leu	Gln	Lys	Lys	auf dem Keller et al., 2010
NLSAVVAA	LSAV	6684	6.28			signal recognition particle 72 kDa protein	O76094	148-163	TNLSA+VVAAQSNWEK	N	MS	Asn	Leu	Ser	Ala	Val	Val	Ala	Ala	Schilling & Overall, 2008
NLSNLKAP	LSNL	148	32.5			heat shock 70 kDa protein 4	P34932	743-767	peptide-Asn750+Leu-peptide	N	MS	Asn	Lys	Leu	Asn	Leu	Gln	Asn	Lys	Schilling & Overall, 2008
NLSRAIGD	LSRA	24285	0.48			proteasome activator complex subunit 1	Q06323	51-71	ANLSN+LKAPLDIPVPDPVKE	N	MS	Asn	Leu	Ser	Asn	Leu	Lys	Ala	Pro	Schilling & Overall, 2008
NMGSLSVK	MGSL	452	28.9			peptidyl-prolyl cis-trans isomerase A	P17742	2-164	peptide-Ala38+Leu-peptide	N	MS	Asn	Phe	Arg	Ala	Leu	Ser	Thr	Gly	Kleifeld et al., 2010
-NNALESK	NNAL	15690	1.09			insulin-like growth factor 2 mRNA-binding protein 1	Q9NZI8	145-164	NHA+LKVSYIPDEQIAQGPE	N	MS	-	Asn	His	Ala	Leu	Lys	Val	Ser	Schilling & Overall, 2008
NNSSLIGL	NSSL	3365	14.2			proteasome subunit beta type-4 precursor	P28070	89-109	VNNST+MLGASGDYADFQYLK	N	MS	Asn	Asn	Ser	Thr	Met	Leu	Gly	Ala	Schilling & Overall, 2008
NNSTMLGA	NSTM	78415	0.04			metabotropic glutamate receptor 4 precursor	Q14833	88-104	INNDPD+LLPNITLGAR	N	MS	Asn	Asp	Pro	Asp	Leu	Leu	Pro	Asn	Schilling & Overall, 2008
NPAMLHNI	PAML	40	34.22			Prolactin-2C2	P04095	30-224	peptide-Trp179+Phe-peptide	N	MS	Asn	Pro	Ala	Trp	Phe	Leu	Gln	Ser	auf dem Keller et al., 2010
NPAWFLQS	PAWF	1214	23.12			Prolactin-2C3	P04768	30-224	peptide-Trp179+Phe-peptide	N	MS	Asn	Pro	Ala	Trp	Phe	Leu	Gln	Ser	auf dem Keller et al., 2010
NPDNLQGG	PDNL	5334	9.03			Eukaryotic translation initiation factor 4E	P63073	2-217	peptide-His33+Tyr-peptide	N	MS	Asn	Pro	Glu	His	Tyr	Ile	Lys	His	auf dem Keller et al., 2010
NPEHYIKH	PEHY	4676	10.65			lamina-associated polypeptide 2 isoform alpha	P42166	122-143	peptide-Pro133+Ile-peptide	N	MS	Asn	Pro	Gly	Pro	Ile	Val	Gly	Thr	Schilling & Overall, 2008
NPGPIVGT	PGPI	3233	14.6			elongation factor 1-alpha 2	Q05639	389-403	NPKS+LKSGDAAIVE	N	MS	Asn	Pro	Lys	Ser	Leu	Lys	Ser	Gly	Schilling & Overall, 2008
NPKSLKSG	PKSL	189	32.03			transitional endoplasmic reticulum ATPase	Q01853	2-806	peptide-Ala463+Leu-peptide	N	MS	Asn	Pro	Ser	Ala	Leu	Arg	Glu	Thr	Kleifeld et al., 2010
NPNALFPP	PNAL	563	27.96			NFU1 iron-sulfur cluster scaffold homolog, mitochondrial	Q9UMS0	66-82	TPNPNS+LKFIPGKPVLE	N	MS	Asn	Pro	Asn	Ser	Leu	Lys	Phe	Ile	Schilling & Overall, 2008
NPNSLKFI	PNSL	988	24.63			NFU1 iron-sulfur cluster scaffold homolog, mitochondrial isoform 3	Q9UMS0-3	41-58	TPNPNS+LKFIPGKPVLE	N	MS	Asn	Pro	Asn	Ser	Leu	Lys	Phe	Ile	Schilling & Overall, 2008
NPRHFVDS	PRHF	693	26.67			fatty acid synthase	P49327	802-825	peptide-Ala814+Leu-peptide	N	MS	Asn	Pro	Asn	Ala	Leu	Phe	Pro	Pro	Schilling & Overall, 2008
NPRNFSDN	PRNF	248	31.22			40S ribosomal protein S18	P62270	2-152	peptide-Gln76+Tyr-peptide	N	MS	Asn	Pro	Arg	Gln	Tyr	Lys	Ile	Pro	auf dem Keller et al., 2010
NPRQYKIP	PRQY	1431	21.81			Staphylococcal nuclease domain-containing protein 1	Q78PY7	2-910	peptide-His185+Phe-peptide	N	MS	Asn	Pro	Arg	His	Phe	Val	Asp	Ser	Prudova et al., 2010
NPSALRET	PSAL	3	36.19			Transitional endoplasmic reticulum ATPase	Q01853	2-806	peptide-Ala719+Met-peptide	N	MS	Asn	Pro	Ser	Ala	Met	Glu	Val	Glu	auf dem Keller et al., 2010
NPSAMEVE	PSAM	128	32.78			biglycan	P28653	38-369	peptide-Pro344+Tyr-peptide	N	MS	Asn	Pro	Val	Pro	Tyr	Trp	Glu	Val	Kleifeld et al., 2010
NPVPYWEV	PVPY	278	30.82			single-stranded DNA-binding protein, mitochondrial precursor	Q04837	51-66	NPVT+IFSLATNEMWR	N	MS	Asn	Pro	Val	Thr	Ile	Phe	Ser	Leu	Schilling & Overall, 2008
NPVTIFSL	PVTI	4346	11.55			Importin-7	Q9EPL8	1-1038	peptide-Trp976+Tyr-peptide	N	MS	Asn	Pro	Val	Trp	Tyr	Gln	Ala	Leu	Prudova et al., 2010
NPVWYQAL	PVWY	1569	21.01			Ubiquitin fusion degradation protein 1 homolog	P70362	1-307	peptide-Pro276+Leu-peptide	N	MS	Asn	Ser	Arg	Pro	Leu	Val	Lys	Lys	auf dem Keller et al., 2010
NQLPLVIE	QLPL	6357	6.9			SPARC	P07214	18-302	peptide-Arg204+Leu-peptide	N	MS	Asn	Glu	Lys	Arg	Leu	Glu	Ala	Gly	auf dem Keller et al., 2010
NSFGLRFG	SFGL	39283	0.19			Superoxide dismutase [Cu-Zn]	P00441	37-70	peptide-Gly57+Cys-peptide	N	MS	Asn	Thr	Ala	Gly	Cys	Thr	Ser	Ala	Schilling & Overall, 2008
-NSNLVGA	NSNL	3632	13.4			tubulin beta-4 chain	P04350	336-350	NSS+YFVEWIPNNVK	N	MS	-	Asn	Ser	Ser	Tyr	Phe	Val	Glu	Schilling & Overall, 2008
NSRPLVKK	SRPL	4203	11.88			metastasis-suppressor KiSS-1	Q15726	20-145	peptide-Gly118+Leu-peptide	P		Asn	Ser	Phe	Gly	Leu	Arg	Phe	Gly	Takino et al., 2003	16541
-NSSYFVE	NSSY	6491	6.64			cDNA, FLJ95457, highly similar to Homo sapiens tubulin, beta, 4	B2RBD5	336-350	NSS+YFVEWIPNNVK	N	MS	-	Asn	Ser	Ser	Tyr	Phe	Val	Glu	Schilling & Overall, 2008
NTAGCTSA	TAGC	93010	0			ADP-ribosylation factor 2	Q8BSL7	2-181	peptide-Gly87+Leu-peptide	N	MS	Asn	Thr	Gln	Gly	Leu	Ile	Phe	Val	auf dem Keller et al., 2010
NTQGLIFV	TQGL	8943	3.48			ADP-ribosylation factor 1	P84078	2-181	peptide-Gly87+Leu-peptide	N	MS	Asn	Thr	Gln	Gly	Leu	Ile	Phe	Val	auf dem Keller et al., 2010
NVAAILEL	VAAI	368	29.77			protein DEK	P35659	125-137	NVGQ+FSGFPFEK	N	MS	Asn	Val	Gly	Gln	Phe	Ser	Gly	Phe	Schilling & Overall, 2008
NVGKLLKG	VGKL	1553	21.06			Calcyclin-binding protein	Q9CXW3	2-229	peptide-Lys197+Lys-peptide	N	MS	Asn	Val	Leu	Lys	Lys	Ile	Tyr	Glu	auf dem Keller et al., 2010
NVGQFSGF	VGQF	5973	7.73			eukaryotic translation initiation factor 3 subunit K	Q9UBQ5	2020-05-24	QMRANVGK+LLKGIDRYNPE	N	MS	Asn	Val	Gly	Lys	Leu	Leu	Lys	Gly	Schilling & Overall, 2008
NVKGYLGP	VKGY	3404	14.06			adenylyl cyclase-associated protein 1	Q01518	330-348	VENQENVSN+LVIEDTELK	N	MS	Asn	Val	Ser	Asn	Leu	Val	Ile	Glu	Schilling & Overall, 2008
NVLKKIYE	VLKK	116979	0			malate dehydrogenase, mitochondrial	P08249	25-338	peptide-Gly79+Tyr-peptide	N	MS	Asn	Val	Lys	Gly	Tyr	Leu	Gly	Pro	Kleifeld et al., 2010
NVSNLVIE	VSNL	56	33.88			fibronectin	P02751	32-2386	peptide-Val1247+Tyr-peptide	P	MS	Asn	Val	Ser	Val	Tyr	Thr	Val	Lys	Doucet & Overall, 2010
NVSVYTVK	VSVY	21327	0.61			14-3-3 protein gamma	P61982	2-247	peptide-Glu32+Leu-peptide	N	MS	Asn	Val	Thr	Glu	Leu	Asn	Glu	Pro	auf dem Keller et al., 2010
NVTELNEP	VTEL	38961	0.19			myosin-9	P35579	1283-1302	NVTG+LLSQSDSKSSKLTKD	N	MS	Asn	Val	Thr	Gly	Leu	Leu	Ser	Gln	Schilling & Overall, 2008
NVTGLLSQ	VTGL	4327	11.6			ubiquitin-like modifier-activating enzyme 1	P22314	350-368	NEEDAAE+LVALAQAVNAR	N	MS	Asp	Ala	Ala	Glu	Leu	Val	Ala	Leu	Schilling & Overall, 2008
NYATVISH	YATV	72259	0.05			60S ribosomal protein L8	P62917	128-144	ASG+NYATVISHNPETK	N	MS	-	Ala	Ser	Gly	Asn	Tyr	Ala	Thr	Schilling & Overall, 2008
NYECLVYV	YECL	147422	0			Protein S100-A8	P27005	1989-02-01	peptide-Asn21+Ile-peptide	P	NT	Asn	Tyr	Ser	Asn	Ile	Gln	Gly	Asn	Greenlee et al., 2006
NYQNSESG	YQNS	75964	0.04			ATP-dependent DNA helicase 2 subunit 2	P13010	413-431	HNYEC+LVYVQLPFMEDLR	N	MS	Asn	Tyr	Glu	Cys	Leu	Val	Tyr	Val	Schilling & Overall, 2008
NYSNIQGN	YSNI	3195	14.68			serine/threonine-protein phosphatase 4 catalytic subunit	P60510	265-281	CGNVAA+ILELDEHLQK	N	MS	Asn	Val	Ala	Ala	Ile	Leu	Glu	Leu	Schilling & Overall, 2008
PAAELLDS	AAEL	2913	15.51			HEAT repeat-containing protein 3	Q8BQM4	1-679	peptide-Glu42+Leu-peptide	N	MS	Pro	Ala	Ala	Glu	Leu	Leu	Glu	Lys	auf dem Keller et al., 2010
PAAELLEK	AAEL	2913	15.51			ras GTPase-activating-like protein IQGAP1	P46940	561-579	QIPAAK+LEGVLAEVAQHY	N	MS	Pro	Ala	Ala	Lys	Leu	Glu	Gly	Val	Schilling & Overall, 2008
PAAKLEGV	AAKL	3259	14.55			T-complex protein 1 subunit theta	P50990	77-94	VQHPAAK+MIVMASHMQE	N	MS	Pro	Ala	Ala	Lys	Met	Ile	Val	Met	Schilling & Overall, 2008
PAAKMIVM	AAKM	8404	3.94			histone H1.2	P16403	2020-01-21	SETAPAAP+AAAPPAEKAPVK	N	MS	Pro	Ala	Ala	Pro	Ala	Ala	Ala	Pro	Schilling & Overall, 2008
PAAPAAAP	AAPA	18613	0.78			phosphoserine phosphatase	P78330	173-202	peptide-Ala192+Phe-peptide	N	MS	Pro	Ala	Asp	Ala	Phe	Ile	Gly	Phe	Schilling & Overall, 2008
PACALLLL	ACAL	8037	4.38			non-histone chromosomal protein HMG-17	P05204	28-90	peptide-Asn72+Gly-peptide	N	MS	Pro	Ala	Glu	Asn	Gly	Asp	Ala	Lys	Schilling & Overall, 2008
PADAFIGF	ADAF	92170	0			ubiquitinyl hydrolase-L1	P09936	27-63	peptide-Ala48+Leu-peptide	N	MS	Pro	Ala	Cys	Ala	Leu	Leu	Leu	Leu	Schilling & Overall, 2008
PAEDCISS	AEDC	152003	0			CKAP5 protein	Q8IYN5	23-46	peptide-Asp33+Cys-peptide	N	MS	Pro	Ala	Glu	Asp	Cys	Ile	Ser	Ser	Schilling & Overall, 2008
PAENGDAK	AENG	138331	0			Cytoskeleton-associated protein 5	Q14008	1103-1125	peptide-Asp1112+Cys-peptide	N	MS	Pro	Ala	Glu	Asp	Cys	Ile	Ser	Ser	Schilling & Overall, 2008
PAFNVING	AFNV	102299	0			beta-enolase	P13929	143-167	peptide-Asn151+Val-peptide	N	MS	Pro	Ala	Phe	Asn	Val	Ile	Asn	Gly	Schilling & Overall, 2008
PAGSLTSV	AGSL	3106	14.97			Connective tissue growth factor	P29279	27-349	peptide-Ala180+Ala-peptide	P	NT	Pro	Ala	Leu	Ala	Ala	Tyr	Arg	Leu	Dean et al., 2007	20073
PALAAYRL	ALAA	9446	3.1			gamma-enolase	P09104	143-167	peptide-Asn151+Val-peptide	N	MS	Pro	Ala	Phe	Asn	Val	Ile	Asn	Gly	Schilling & Overall, 2008
PASPLQHL	ASPL	465	28.81			ATP-citrate synthase	P53396	995-1012	QHFPATP+LLDYALEVEK	N	MS	Pro	Ala	Thr	Pro	Leu	Leu	Asp	Tyr	Schilling & Overall, 2008
PATPLLDY	ATPL	1504	21.34			transgelin-2	Q9WVA4	2-199	peptide-Phe162+Ser-peptide	N	MS	Pro	Arg	Asn	Phe	Ser	Asp	Asn	Gln	Kleifeld et al., 2010
PCCDWVGD	CCDW	159257	0			proteasome subunit alpha type-4	P25789	96-118	peptide-Gln109+Leu-peptide	N	MS	Pro	Cys	Glu	Gln	Leu	Val	Thr	Ala	Schilling & Overall, 2008
PCEPFKFL	CEPF	100351	0			elongation factor 2	P13639	456-481	peptide-Asn468+Ile-peptide	N	MS	Pro	Cys	Gly	Asn	Ile	Val	Gly	Leu	Schilling & Overall, 2008
PCEQLVTA	CEQL	137608	0			aspartyl-tRNA synthetase, cytoplasmic	P14868	324-347	peptide-Pro336+Phe-peptide	N	MS	Pro	Cys	Glu	Pro	Phe	Lys	Phe	Leu	Schilling & Overall, 2008
PCGNIVGL	CGNI	105668	0			thioredoxin domain-containing protein 1 precursor	Q9H3N1	260-280	FPQNA+IRQRSLGPSLATDKS	N	MS	Pro	Gln	Asn	Ala	Ile	Arg	Gln	Arg	Schilling & Overall, 2008
PEANILGQ	EANI	67727	0.05			Ran-specific GTPase-activating protein	P34022	2-203	peptide-Glu37+Ile-peptide	N	MS	Pro	Glu	Gln	Glu	Ile	Lys	Thr	Leu	auf dem Keller et al., 2010
PEICKQDI	EICK	150991	0			40S ribosomal protein S10	P63325	1-165	peptide-Asp137+Lys-peptide	N	MS	Pro	Gly	Ala	Asp	Lys	Lys	Ala	Glu	auf dem Keller et al., 2010
PEQEIKTL	EQEI	158659	0			72 kDa type IV collagenase	P08253	110-660	peptide-Cys469+Lys-peptide	P	MS	Pro	Glu	Ile	Cys	Lys	Gln	Asp	Ile	auf dem Keller et al., 2010
PFAEYMWM	FAEY	6743	6.17			tubulin beta-4 chain	P04350	77-103	peptide-Gln83+Ile-peptide	N	MS	Pro	Phe	Gly	Gln	Ile	Phe	Arg	Pro	Schilling & Overall, 2008
PFGQIFRP	FGQI	9014	3.43			tubulin beta-2C chain	P68371	77-103	peptide-Gln83+Ile-peptide	N	MS	Pro	Phe	Gly	Gln	Ile	Phe	Arg	Pro	Schilling & Overall, 2008
PFGTITSA	FGTI	13406	1.48			phosphoglycerate kinase 1 (EC 2.7.2.3)	P00558	205-233	peptide-Ala210+Ile-peptide	N	MS	Pro	Phe	Leu	Ala	Ile	Leu	Gly	Gly	Schilling & Overall, 2008
PFLAILGG	FLAI	55840	0.09			fibronectin	P02751	32-2386	peptide-Pro720+Leu-peptide	P	NT	Pro	Phe	Ser	Pro	Leu	Val	Ala	Thr	Doucet & Overall, 2010
PFSPLVAT	FSPL	3161	14.78			Synaptic vesicle membrane protein VAT-1 homolog	Q62465	2-406	peptide-Pro50+Glu-peptide	N	MS	Pro	Pro	Ala	Pro	Glu	Ala	Ser	Ala	Prudova et al., 2010
PGADKKAE	GADK	101356	0			F-actin-capping protein subunit alpha-1	P47753	2-286	peptide-Phe29+Asn-peptide	N	MS	Pro	Gly	Glu	Phe	Asn	Glu	Val	Phe	auf dem Keller et al., 2010
PGEFNEVF	GEFN	24612	0.47			F-actin-capping protein subunit alpha-2	P47754	2-286	peptide-Phe29+Asn-peptide	N	MS	Pro	Gly	Glu	Phe	Asn	Glu	Val	Phe	auf dem Keller et al., 2010
PGFMCQGG	GFMC	126810	0			high mobility group protein HMG-I/HMG-Y	P17095	2-107	peptide-Ala40+Leu-peptide	N	MS	Pro	Gly	Thr	Ala	Leu	Val	Gly	Ser	Kleifeld et al., 2010
PGFQLVFL	GFQL	71576	0.05			Peptidyl-prolyl cis-trans isomerase A	P17742	2-164	peptide-Met61+Cys-peptide	N	MS	Pro	Gly	Phe	Met	Cys	Gln	Gly	Gly	auf dem Keller et al., 2010
PGGGLYGE	GGGL	18324	0.81			peroxiredoxin-6	P30041	2020-01-22	peptide-Leu5+Leu-peptide	N	MS	Pro	Gly	Gly	Leu	Leu	Leu	Gly	Asp	Schilling & Overall, 2008
-PGGLLLG	PGGL	254	31.16			Macrophage migration inhibitory factor	P34884	2-115	Pro-Met-Phe4+Ile-peptide	N	MS	-	Pro	Met	Phe	Ile	Val	Asn	Thr	auf dem Keller et al., 2010
PGGLLLGD	GGLL	16433	1			filamin-A	P21333	1359-1375	VHGPGIQ+SGTTNKPNK	N	MS	Pro	Gly	Ile	Gln	Ser	Gly	Thr	Thr	Schilling & Overall, 2008
PGGNLGAQ	GGNL	5339	9.02			Transcriptional activator protein Pur-beta	O35295	2-324	peptide-Gly226+Leu-peptide	N	MS	Pro	Gly	Gly	Gly	Leu	Tyr	Gly	Glu	auf dem Keller et al., 2010
PGIQSGTT	GIQS	21043	0.63			thymidine phosphorylase precursor	P19971	344-367	peptide-Ala357+Arg-peptide	N	MS	Pro	Gly	Leu	Ala	Arg	Ala	Leu	Cys	Schilling & Overall, 2008
PGKGILAA	GKGI	73151	0.04			fructose-bisphosphate aldolase	A6ZI44	1-418	peptide-Gly83+Ile-peptide	N	MS	Pro	Gly	Lys	Gly	Ile	Leu	Ala	Ala	Kleifeld et al., 2010
PGKLYTLV	GKLY	39869	0.18			X-ray repair cross-complementing protein 6	P12956	424-444	IQVTPPGFQ+LVFLPFADDKR	N	MS	Pro	Gly	Phe	Gln	Leu	Val	Phe	Leu	Schilling & Overall, 2008
PGLARALC	GLAR	18419	0.8			X-ray repair cross-complementing protein 6	P12956	339-357	FDDPGLM+LMGFKPLVLLK	N	MS	Pro	Gly	Leu	Met	Leu	Met	Gly	Phe	Schilling & Overall, 2008
PGLMLMGF	GLML	34380	0.25			fructose-bisphosphate aldolase A	P04075	16-44	peptide-Gly29+Ile-peptide	N	MS	Pro	Gly	Lys	Gly	Ile	Leu	Ala	Ala	Schilling & Overall, 2008
PGTALVGS	GTAL	32119	0.28			peptidyl-prolyl cis-trans isomerase	Q0VDC6	111-143	peptide-Thr134+Leu-peptide	N	MS	Pro	His	Ala	Thr	Leu	Val	Phe	Asp	Schilling & Overall, 2008
PHATLVFD	HATL	4385	11.45			SUMO-activating enzyme subunit 1	Q9UBE0	313-341	peptide-Asn327+Phe-peptide	N	MS	Pro	His	Asn	Asn	Phe	Phe	Phe	Phe	Schilling & Overall, 2008
PHNNFFFF	HNNF	9974	2.73			WD40 repeat-containing protein SMU1	Q2TAY7	485-509	peptide-Asn497+Leu-peptide	N	MS	Pro	His	Gln	Asn	Leu	Ile	Ala	Thr	Schilling & Overall, 2008
PHQNLIAT	HQNL	2309	17.75			Carboxypeptidase E	Q00493	43-476	peptide-Asn390+Ala-peptide	N	MS	Pro	Ile	Ala	Asn	Ala	Thr	Ile	Ser	auf dem Keller et al., 2010
PIANATIS	IANA	3550	13.67			Moesin	P26041	2-577	peptide-Lys262+Lys-peptide	N	MS	Pro	Ile	Asp	Lys	Lys	Ala	Pro	Asp	auf dem Keller et al., 2010
PICSLHDQ	ICSL	9093	3.35			ubiquitin-like modifier-activating enzyme 1	P22314	626-642	KSIPICT+LKNFPNAIE	N	MS	Pro	Ile	Cys	Thr	Leu	Lys	Asn	Phe	Schilling & Overall, 2008
PICTLKNF	ICTL	23855	0.49			ACAT1 protein	Q96FG8	49-66	TPIGS+FLGSLSLLPATK	N	MS	Pro	Ile	Gly	Ser	Phe	Leu	Gly	Ser	Schilling & Overall, 2008
PIDKKAPD	IDKK	143574	0			Radixin	P26043	1-583	peptide-Lys262+Lys-peptide	N	MS	Pro	Ile	Asp	Lys	Lys	Ala	Pro	Asp	auf dem Keller et al., 2010
PIGSFLGS	IGSF	2219	18.1			cDNA, FLJ92949, Homo sapiens acetyl-Coenzyme A acetyltransferase 1	B2R6H1	49-66	TPIGS+FLGSLSLLPATK	N	MS	Pro	Ile	Gly	Ser	Phe	Leu	Gly	Ser	Schilling & Overall, 2008
PIKPMQFL	IKPM	7672	4.8			electron transfer flavoprotein subunit alpha, mitochondrial precursor	P13804	126-146	LEVAPISD+IIAIKSPDTFVR	N	MS	Pro	Ile	Ser	Asp	Ile	Ile	Ala	Ile	Schilling & Overall, 2008
PISDIIAI	ISDI	7380	5.19			cDNA, FLJ93526, Homo sapiens ribosomal protein S3	B2R7N5	204-243	peptide-Glu225+Gln-peptide	N	MS	Pro	Ile	Ser	Glu	Gln	Lys	Gly	Gly	Schilling & Overall, 2008
PISEQKGG	ISEQ	13240	1.52			ribosomal protein S3 variant	Q53G83	204-243	peptide-Glu225+Gln-peptide	N	MS	Pro	Ile	Ser	Glu	Gln	Lys	Gly	Gly	Schilling & Overall, 2008
PISGLGGT	ISGL	309	30.52			elongation factor 1-alpha 1	P68104	180-212	peptide-Gly195+Trp-peptide	N	MS	Pro	Ile	Ser	Gly	Trp	Asn	Gly	Asp	Schilling & Overall, 2008
PISGWNGD	ISGW	1494	21.41			Putative elongation factor 1-alpha-like 3	Q5VTE0	180-212	peptide-Gly195+Trp-peptide	N	MS	Pro	Ile	Ser	Gly	Trp	Asn	Gly	Asp	Schilling & Overall, 2008
PKEKLKEL	KEKL	133039	0			Phosphoglycerate mutase 1	Q9DBJ1	2-254	peptide-Phe232+Leu-peptide	N	MS	Pro	Met	Gln	Phe	Leu	Gly	Asp	Glu	auf dem Keller et al., 2010
PLAAVTTA	LAAV	1828	19.77			Fructose-bisphosphate aldolase A	P05064	2-364	peptide-Gly118+Thr-peptide	N	MS	Pro	Leu	Ala	Gly	Thr	Asn	Gly	Glu	auf dem Keller et al., 2010
PLAGTNGE	LAGT	38183	0.2			fructose-bisphosphate aldolase	Q9CPQ9	1-364	peptide-Gly118+Thr-peptide	N	MS	Pro	Leu	Ala	Gly	Thr	Asn	Gly	Glu	Kleifeld et al., 2010
PLAVEVVT	LAVE	86514	0			Serine/threonine-protein phosphatase 2A 65 kDa regulatory subunit A alpha isoform	Q76MZ3	2-589	peptide-Ser95+Leu-peptide	N	MS	Pro	Leu	Glu	Ser	Leu	Ala	Thr	Val	auf dem Keller et al., 2010
PLESLATV	LESL	4681	10.63			peptidyl-prolyl cis-trans isomerase A	P17742	2-164	peptide-Arg19+Val-peptide	N	MS	Pro	Leu	Gly	Arg	Val	Ser	Phe	Glu	Kleifeld et al., 2010
PLGGFVHY	LGGF	3808	12.91			60S ribosomal protein L3	P39023	2-403	peptide-Gly319+Phe-peptide	N	MS	Pro	Leu	Gly	Gly	Phe	Val	His	Tyr	Schilling & Overall, 2008
PLGKLSKR	LGKL	1099	23.88			pre-mRNA-processing-splicing factor 8	Q6P2Q9	2170-2198	peptide-Trp2177+Ile-peptide	N	MS	Pro	Leu	Gly	Trp	Ile	His	Thr	Gln	Schilling & Overall, 2008
PLGRVSFE	LGRV	18643	0.78			60S ribosomal protein L3	P39023	312-334	peptide-Gly319+Phe-peptide	N	MS	Pro	Leu	Gly	Gly	Phe	Val	His	Tyr	Schilling & Overall, 2008
PLGWIHTQ	LGWI	299	30.58			ubiquitin-like modifier-activating enzyme 1	P22314	214-237	peptide-Ala219+Met-peptide	N	MS	Pro	Leu	Ser	Ala	Met	Val	Ser	Met	Schilling & Overall, 2008
PLSAMVSM	LSAM	377	29.69			Ubiquitin-like modifier-activating enzyme 1	Q02053	1-1058	peptide-Ala219+Met-peptide	N	MS	Pro	Leu	Ser	Ala	Met	Val	Ser	Met	Prudova et al., 2010
PLSKIKTL	LSKI	7909	4.52			Cytoskeleton-associated protein 5	Q14008	1953-1981	peptide-Ser1961+Leu-peptide	N	MS	Pro	Leu	Thr	Ser	Leu	Leu	Ser	Lys	Schilling & Overall, 2008
PLTSLLSK	LTSL	7554	4.95			CKAP5 protein	Q8IYN5	873-902	peptide-Ser882+Leu-peptide	N	MS	Pro	Leu	Thr	Ser	Leu	Leu	Ser	Lys	Schilling & Overall, 2008
-PMFIVNT	PMFI	5689	8.26			WD repeat-containing protein 1	O88342	2-606	Pro-Tyr-Glu4+Ile-peptide	N	MS	-	Pro	Tyr	Glu	Ile	Lys	Lys	Val	auf dem Keller et al., 2010
PMGGVMSG	MGGV	41199	0.17			39S ribosomal protein L12, mitochondrial precursor	P52815	91-125	peptide-Gly102+Val-peptide	N	MS	Pro	Met	Gly	Gly	Val	Met	Ser	Gly	Schilling & Overall, 2008
PMQFLGDE	MQFL	4468	11.17			5C5	Q15693	91-125	peptide-Gly102+Val-peptide	N	MS	Pro	Met	Gly	Gly	Val	Met	Ser	Gly	Schilling & Overall, 2008
PMSQLSAA	MSQL	1258	22.77			Polyadenylate-binding protein-interacting protein 2	Q9D6V8	1-124	peptide-Glu33+Tyr-peptide	N	MS	Pro	Phe	Ala	Glu	Tyr	Met	Trp	Met	auf dem Keller et al., 2010
PNQNQTKN	NQNQ	138121	0			6-phosphogluconate dehydrogenase, decarboxylating	P52209	163-184	peptide-Asp172+Trp-peptide	N	MS	Pro	Cys	Cys	Asp	Trp	Val	Gly	Asp	Schilling & Overall, 2008
PPAPEASA	PAPE	24221	0.48			coatomer subunit alpha	P53621	789-819	peptide-Pro800+Ile-peptide	N	MS	Pro	Pro	Ala	Pro	Ile	Met	Pro	Leu	Schilling & Overall, 2008
PPAPIMPL	PAPI	311	30.48			UV excision repair protein RAD23 homolog A	P54725	80-119	peptide-Pro107+Thr-peptide	N	MS	Pro	Pro	Ala	Pro	Thr	Ser	Gly	Met	Schilling & Overall, 2008
PPAPTSGM	PAPT	14133	1.34			Nuclease-sensitive element-binding protein 1	P62960	2-322	peptide-Asn155+Tyr-peptide	N	MS	Pro	Pro	Arg	Asn	Tyr	Gln	Gln	Asn	auf dem Keller et al., 2010
PPDPILGV	PDPI	30263	0.31			heterogeneous nuclear ribonucleoprotein R	O43390	146-171	peptide-Ser154+Val-peptide	N	MS	Pro	Pro	Asp	Ser	Val	Tyr	Ser	Gly	Schilling & Overall, 2008
PPDQLTSS	PDQL	32135	0.28			aspartate aminotransferase, mitochondrial precursor	P00505	28-53	peptide-Pro43+Ile-peptide	N	MS	Pro	Pro	Asp	Pro	Ile	Leu	Gly	Val	Schilling & Overall, 2008
PPDSVYSG	PDSV	96178	0			Heterogeneous nuclear ribonucleoprotein Q	Q7TMK9	2-623	peptide-Ser151+Val-peptide	N	MS	Pro	Pro	Asp	Ser	Val	Tyr	Ser	Gly	Prudova et al., 2010
PPEEFVFI	PEEF	87751	0			PDZ and LIM domain protein 1	O00151	314-329	VTPPEG+YEVVTVFPK	N	MS	Pro	Pro	Glu	Gly	Tyr	Glu	Val	Val	Schilling & Overall, 2008
PPEGYEVV	PEGY	2235	18.03			fatty acid synthase	P49327	611-631	EAHLPPGA+MAAVGLSWEECK	N	MS	Pro	Pro	Gly	Ala	Met	Ala	Ala	Val	Schilling & Overall, 2008
PPEQLATR	PEQL	3975	12.46			heterogeneous nuclear ribonucleoprotein U-like protein 2	Q1KMD3	417-439	peptide-Glu427+Phe-peptide	N	MS	Pro	Pro	Glu	Glu	Phe	Val	Phe	Ile	Schilling & Overall, 2008
PPGAMAAV	PGAM	495	28.53			galectin-3	P17931	2-250	peptide-Ala62+Tyr-peptide	P		Pro	Pro	Gly	Ala	Tyr	His	Gly	Ala	Ochieng et al., 1994	18106
PPGAYHGA	PGAY	614	27.42			membrane-type matrix metallopeptidase-1 precursor	P50281	21-582	peptide-Asp49+Leu-peptide	P		Pro	Pro	Gly	Asp	Leu	Arg	Thr	His	Golubkov et al., 2007
PPGDLRTH	PGDL	1826	19.78			F-actin-capping protein subunit alpha-2	P47754	2-286	peptide-Glu28+Phe-peptide	N	MS	Pro	Pro	Gly	Glu	Phe	Asn	Glu	Val	Prudova et al., 2010
PPGEFNEV	PGEF	6457	6.71			F-actin-capping protein subunit alpha-1	P47753	2-286	peptide-Glu28+Phe-peptide	N	MS	Pro	Pro	Gly	Glu	Phe	Asn	Glu	Val	auf dem Keller et al., 2010
PPGFQLVF	PGFQ	55091	0.09			RNA-binding protein EWS isoform 5	Q01844-5	620-637	GGPGGPPGP+LMEQMGGR	N	MS	Pro	Pro	Gly	Pro	Leu	Met	Glu	Gln	Schilling & Overall, 2008
PPGGKGSG	PGGK	113480	0			cDNA FLJ76605, highly similar to Homo sapiens secretory carrier membrane protein 1	A8K2G0	42-79	peptide-Gly50+Val-peptide	N	MS	Pro	Pro	Gly	Gly	Val	Lys	Met	Pro	Schilling & Overall, 2008
PPGGLLGH	PGGL	254	31.16			Hematological and neurological expressed 1-like protein	Q6PGH2	1-190	peptide-Gly66+Lys-peptide	N	MS	Pro	Pro	Gly	Gly	Lys	Gly	Ser	Gly	auf dem Keller et al., 2010
PPGGVKMP	PGGV	10483	2.43			SCAMP1 protein	Q6FG23	42-79	peptide-Gly50+Val-peptide	N	MS	Pro	Pro	Gly	Gly	Val	Lys	Met	Pro	Schilling & Overall, 2008
PPGPLMEQ	PGPL	256	31.15			splicing factor 3 subunit 1	Q15459	607-625	LPPGS+VIAPMPPIIHAPR	N	MS	Pro	Pro	Gly	Ser	Val	Ile	Ala	Pro	Schilling & Overall, 2008
PPGSVIAP	PGSV	14738	1.24			protein disulfide-isomerase A4 precursor	P13667	222-240	LSKRSPPIP+LAKVDATAE	N	MS	Pro	Pro	Ile	Pro	Leu	Ala	Lys	Val	Schilling & Overall, 2008
PPIPLAKV	PIPL	92	33.12			Synaptic vesicle membrane protein VAT-1 homolog	Q62465	2-406	peptide-Pro120+Val-peptide	N	MS	Pro	Pro	Leu	Pro	Val	Thr	Pro	Gly	auf dem Keller et al., 2010
PPKELVNE	PKEL	604	27.47			Calreticulin	P14211	18-416	peptide-Lys207+Ile-peptide	N	MS	Pro	Pro	Lys	Lys	Ile	Lys	Asp	Pro	auf dem Keller et al., 2010
PPKKIKDP	PKKI	13213	1.52			DNA ligase 1	P18858	179-204	peptide-Pro187+Leu-peptide	N	MS	Pro	Pro	Lys	Pro	Leu	Lys	Thr	Ser	Schilling & Overall, 2008
PPKPLKTS	PKPL	63	33.56			26S proteasome non-ATPase regulatory subunit 3	P14685	1-530	peptide-Ser496+Tyr-peptide	N	MS	Pro	Pro	Lys	Ser	Tyr	Asn	Lys	Asp	auf dem Keller et al., 2010
PPKSYNKD	PKSY	978	24.68			Protein BAT2-like 2	Q3TLH4	2846-01-01	peptide-Lys412+Leu-peptide	N	MS	Pro	Pro	Pro	Lys	Leu	Leu	Ala	Gln	Prudova et al., 2010
PPLPVTPG	PLPV	814	25.69			protein transport protein Sec24C	P53992	103-204	peptide-Ser191+Gln-peptide	N	MS	Pro	Pro	Leu	Ser	Gln	Ala	Gln	Gly	Schilling & Overall, 2008
PPLSLTIH	PLSL	66	33.53			Interleukin enhancer-binding factor 3 isoform 4	Q12906-4	1-698	EPPLS+LTIHLTSPVVR	N	MS	Pro	Pro	Leu	Ser	Leu	Thr	Ile	His	Schilling & Overall, 2008
PPLSQAQG	PLSQ	704	26.58			cDNA FLJ77456, highly similar to Homo sapiens interleukin enhancer binding factor 3, 90kDa	A8K590	161-177	EPPLS+LTIHLTSPVVR	N	MS	Pro	Pro	Leu	Ser	Leu	Thr	Ile	His	Schilling & Overall, 2008
PPNAFVEG	PNAF	2529	16.89			ubiquitin-like modifier-activating enzyme 1	P22314	723-746	peptide-Gln733+Leu-peptide	N	MS	Pro	Pro	Asp	Gln	Leu	Thr	Ser	Ser	Schilling & Overall, 2008
PPPKLLAQ	PPKL	24377	0.47			Translation initiation factor eIF-2B subunit epsilon	Q8CHW4	2-717	peptide-Pro38+Leu-peptide	N	MS	Pro	Pro	Pro	Pro	Leu	Gln	Ala	Val	auf dem Keller et al., 2010
PPPPLQAV	PPPL	3758	13.03			fusion	Q59H57	116-132	DPPSA+KAAIDWFDGKE	N	MS	Pro	Pro	Ser	Ala	Lys	Ala	Ala	Ile	Schilling & Overall, 2008
PPQKLQAL	PQKL	739	26.28			succinate dehydrogenase [ubiquinone] flavoprotein subunit, mitochondrial precursor	P31040	368-390	peptide-Gln375+Leu-peptide	N	MS	Pro	Pro	Glu	Gln	Leu	Ala	Thr	Arg	Schilling & Overall, 2008
PPQQQRLI	PQQQ	13013	1.57			lin-7 homolog C variant	Q53FX5	29-45	VPPQK+LQALQRVLQSE	N	MS	Pro	Pro	Gln	Lys	Leu	Gln	Ala	Leu	Schilling & Overall, 2008
PPRGILLY	PRGI	45	34.16			Cleavage stimulation factor subunit 2 tau variant	Q8C7E9	1-632	peptide-Gly339+Leu-peptide	N	MS	Pro	Pro	Arg	Gly	Leu	Leu	Gly	Asp	auf dem Keller et al., 2010
PPRGLLGD	PRGL	12	35.25			Eukaryotic translation initiation factor 2 subunit 1	Q6ZWX6	2-315	peptide-Tyr235+Val-peptide	N	MS	Pro	Pro	Arg	Tyr	Val	Met	Thr	Thr	Prudova et al., 2010
PPRNYQQN	PRNY	157	32.4			transitional endoplasmic reticulum ATPase	P55072	221-261	peptide-Gly240+Ile-peptide	N	MS	Pro	Pro	Arg	Gly	Ile	Leu	Leu	Tyr	Schilling & Overall, 2008
PPRYVMTT	PRYV	6239	7.14			AP-2 complex subunit beta	Q9DBG3	1-937	peptide-Ala580+Phe-peptide	N	MS	Pro	Pro	Asn	Ala	Phe	Val	Glu	Gly	Prudova et al., 2010
PPSAKAAI	PSAK	6111	7.44			fusion	Q59H57	115-133	DD+PPSAKAAIDWFDGKEF	N	MS	-	-	Asp	Asp	Pro	Pro	Ser	Ala	Schilling & Overall, 2008
PPSAYGSV	PSAY	93	33.11			talin-1	Q9Y490	35-57	peptide-Asp46+Phe-peptide	N	MS	Pro	Pro	Ser	Asp	Phe	Gly	Leu	Phe	Schilling & Overall, 2008
PPSDFGLF	PSDF	2715	16.23			high mobility group protein B3	O15347	94-110	RPPSG+FFLFCSEFRPK	N	MS	Pro	Pro	Ser	Gly	Phe	Phe	Leu	Phe	Schilling & Overall, 2008
PPSFHLGG	PSFH	20418	0.66			PDZ and LIM domain protein 1	O00151	177-198	peptide-Ser187+Leu-peptide	N	MS	Pro	Pro	Ser	Ser	Leu	Val	Ile	Asp	Schilling & Overall, 2008
PPSGFFLF	PSGF	247	31.24			splicing factor, arginine/serine-rich 1	Q59FA2	155-174	VVSGLPPSG+SWQDLKDHMR	N	MS	Pro	Pro	Ser	Gly	Ser	Trp	Gln	Asp	Schilling & Overall, 2008
PPSGSWQD	PSGS	10750	2.33			microtubule-actin cross-linking factor 1, isoform 4	Q9UPN3-5	4980-5030	peptide-Leu5017+Ile-peptide	N	MS	Pro	Pro	Ser	Leu	Ile	Leu	Asn	Thr	Schilling & Overall, 2008
PPSLILNT	PSLI	2606	16.64			matrin-3	P43243	318-373	peptide-Phe363+His-peptide	N	MS	Pro	Pro	Ser	Phe	His	Leu	Gly	Gly	Schilling & Overall, 2008
PPSSLVID	PSSL	8	35.49			uncharacterized potential DNA-binding protein C17orf49	Q8IXM2	103-133	peptide-Ser120+Ser-peptide	N	MS	Pro	Pro	Ser	Ser	Ser	Ser	Val	Pro	Schilling & Overall, 2008
PPSSSSVP	PSSS	6177	7.29			fibronectin	P02751	32-2386	peptide-Asn1179+Leu-peptide	P	MS	Pro	Pro	Thr	Asn	Leu	His	Leu	Glu	Doucet & Overall, 2010
PPTHQASV	PTHQ	6329	6.97			Ran-binding protein 3	Q9CT10	2-491	peptide-Leu76+Ile-peptide	N	MS	Pro	Pro	Thr	Leu	Ile	His	Gly	Gln	auf dem Keller et al., 2010
PPTLIHGQ	PTLI	69845	0.05			Splicing factor 45	Q8JZX4	1-405	peptide-Ser180+Leu-peptide	N	MS	Pro	Pro	Thr	Ser	Leu	Val	Glu	Lys	Prudova et al., 2010
PPTNLHLE	PTNL	261	31.03			calcium-regulated heat stable protein 1	Q9Y2V2	2020-04-28	peptide-His14+Gln-peptide	N	MS	Pro	Pro	Thr	His	Gln	Ala	Ser	Val	Schilling & Overall, 2008
PPTSLVEK	PTSL	449	28.93			elongation factor 1-alpha 1	P68104	154-172	MDSTEPPYS+QKRYEEIVK	N	MS	Pro	Pro	Tyr	Ser	Gln	Lys	Arg	Tyr	Schilling & Overall, 2008
PPVRLFTE	PVRL	1111	23.81			myristoylated alanine-rich C-kinase substrate	P29966	69-105	peptide-Ala85+Glu-peptide	N	MS	Pro	Ser	Ala	Ala	Glu	Lys	Gly	Glu	Schilling & Overall, 2008
PPYSQKRY	PYSQ	7116	5.56			Putative elongation factor 1-alpha-like 3	Q5VTE0	154-172	MDSTEPPYS+QKRYEEIVK	N	MS	Pro	Pro	Tyr	Ser	Gln	Lys	Arg	Tyr	Schilling & Overall, 2008
PQNAIRQR	QNAI	126067	0			short/branched chain specific acyl-CoA dehydrogenase, mitochondrial precursor	P45954	269-284	VPEAN+ILGQIGHGYK	N	MS	Pro	Glu	Ala	Asn	Ile	Leu	Gly	Gln	Schilling & Overall, 2008
PRKDLFDM	RKDL	44390	0.15			cytochrome c oxidase subunit 6B1	P56391	1986-02-01	peptide-Asn25+Gln-peptide	N	MS	Pro	Asn	Gln	Asn	Gln	Thr	Lys	Asn	Kleifeld et al., 2010
PRNFSDNQ	RNFS	30206	0.32			SHC-transforming protein 3	Q61120	1-474	peptide-Asp329+Leu-peptide	N	MS	Pro	Arg	Lys	Asp	Leu	Phe	Asp	Met	Prudova et al., 2010
PSAAEKGE	SAAE	59579	0.08			fatty acid synthase	P49327	835-883	peptide-Ala860+Ile-peptide	N	MS	Pro	Ser	Ala	Ala	Ile	Tyr	Asn	Ile	Schilling & Overall, 2008
PSAAIYNI	SAAI	4058	12.29			beta-enolase	P13929	32-50	AAVPSGA+STGIYEALELR	N	MS	Pro	Ser	Gly	Ala	Ser	Thr	Gly	Ile	Schilling & Overall, 2008
PSGASTGI	SGAS	32323	0.28			gamma-enolase	P09104	28-45	G+LFRAAVPSGASTGIYE	N	MS	-	-	-	Gly	Leu	Phe	Arg	Ala	Schilling & Overall, 2008
PSGNQNGA	SGNQ	79137	0			Insulin-like growth factor-binding protein 4	P47879	1-254	peptide-Gly21+Asp-peptide	N	MS	Pro	Ser	Leu	Gly	Asp	Glu	Ala	Ile	Prudova et al., 2010
PSKALIAS	SKAL	8440	3.91			zinedin variant	Q59GV6	728-755	peptide-Ala740+Leu-peptide	N	MS	Pro	Ser	Lys	Ala	Leu	Ile	Ala	Ser	Schilling & Overall, 2008
PSLGDEAI	SLGD	49820	0.12			Cytosolic non-specific dipeptidase	Q9D1A2	1-475	peptide-Ser315+Leu-peptide	N	MS	Pro	Ser	Leu	Ser	Leu	His	Gly	Ile	auf dem Keller et al., 2010
PSLSLHGI	SLSL	56026	0.09			striatin-4	Q9NRL3	726-753	peptide-Ala738+Leu-peptide	N	MS	Pro	Ser	Lys	Ala	Leu	Ile	Ala	Ser	Schilling & Overall, 2008
PSSAAKAP	SSAA	26975	0.39			matrin-3	P43243	270-287	GAPPSSN+IEDFHGLLPK	N	MS	Pro	Ser	Ser	Asn	Ile	Glu	Asp	Phe	Schilling & Overall, 2008
PSSNIEDF	SSNI	6625	6.39			mFLJ00343 protein	Q6KAM8	1952-01-01	peptide-Pro657+Phe-peptide	N	MS	Pro	Ser	Ser	Pro	Phe	Gln	Val	Pro	Kleifeld et al., 2010
PSSPFQVP	SSPF	11229	2.12			bifunctional purine biosynthesis protein PURH	P31939	321-354	peptide-Lys331+Ile-peptide	N	MS	Pro	Thr	Ala	Lys	Ile	Ile	Ser	Arg	Schilling & Overall, 2008
PTAKIISR	TAKI	73688	0.04			T-complex protein 1 subunit zeta	P40227	67-101	peptide-Ser75+Leu-peptide	N	MS	Pro	Thr	Ala	Ser	Leu	Ile	Ala	Lys	Schilling & Overall, 2008
PTASLIAK	TASL	2271	17.89			nuclear protein Hcc-1	P82979	117-152	peptide-Gly136+Leu-peptide	N	MS	Pro	Thr	Lys	Gly	Leu	Ser	Ser	Asp	Schilling & Overall, 2008
PTKGLSSD	TKGL	11060	2.18			Heterogeneous nuclear ribonucleoprotein U	Q8VEK3	2-800	peptide-Leu188+Phe-peptide	N	MS	Pro	Thr	Ser	Leu	Phe	Ala	Val	Thr	Prudova et al., 2010
PTSLFAVT	TSLF	61267	0.07			40S ribosomal protein S14	P62264	2-151	peptide-Ala74+Met-peptide	N	MS	Pro	Tyr	Ala	Ala	Met	Leu	Ala	Ala	auf dem Keller et al., 2010
PVAGWINA	VAGW	668	26.89			40S ribosomal protein S17	P63276	2-135	peptide-Gly68+Ile-peptide	N	MS	Pro	Val	Arg	Gly	Ile	Ser	Ile	Lys	Prudova et al., 2010
PVAQLLSM	VAQL	523	28.25			carnosine dipeptidase II	Q96KP4	134-149	GPVAG+WINALEAYQK	N	MS	Pro	Val	Ala	Gly	Trp	Ile	Asn	Ala	Schilling & Overall, 2008
PVCAVVGG	VCAV	91638	0			Superoxide dismutase [Cu-Zn]	P00441	2020-10-31	peptide-Gly17+Ile-peptide	N	MS	Pro	Val	Gln	Gly	Ile	Ile	Asn	Phe	Schilling & Overall, 2008
PVDHILAG	VDHI	28751	0.35			SUMO-activating enzyme subunit 1	Q9UBE0	293-316	peptide-Ala304+Val-peptide	N	MS	Pro	Val	Cys	Ala	Val	Val	Gly	Gly	Schilling & Overall, 2008
PVGDIVSF	VGDI	8636	3.74			cDNA, FLJ92232, highly similar to Homo sapiens barrier to autointegration factor 1	B2R4V4	1932-08-01	peptide-Ser22+Leu-peptide	N	MS	Pro	Val	Gly	Ser	Leu	Ala	Gly	Ile	Schilling & Overall, 2008
PVGRVETG	VGRV	21222	0.62			EEF1A protein	Q14222	21-47	peptide-Arg33+Val-peptide	N	MS	Pro	Val	Gly	Arg	Val	Glu	Thr	Gly	Schilling & Overall, 2008
PVGSLAGI	VGSL	364	29.84			my002 protein	Q9H3L7	39-77	peptide-Ser62+Leu-peptide	N	MS	Pro	Val	Gly	Ser	Leu	Lys	Ser	Val	Schilling & Overall, 2008
PVGSLKSV	VGSL	364	29.84			transgelin-2	P37802	72-91	GQAPVKK+IQASTMAFKQME	N	MS	Pro	Val	Lys	Lys	Ile	Gln	Ala	Ser	Schilling & Overall, 2008
PVKKIQAS	VKKI	146429	0			Proteasome subunit alpha type-1	Q9R1P4	1-263	peptide-Arg107+Leu-peptide	N	MS	Pro	Val	Ser	Arg	Leu	Val	Ser	Leu	auf dem Keller et al., 2010
PVQGIINF	VQGI	2615	16.62			Superoxide dismutase [Cu-Zn]	P00441	2020-04-24	AVCV+LKGDGPVQGIINFEQK	N	MS	Ala	Val	Cys	Val	Leu	Lys	Gly	Asp	Schilling & Overall, 2008
PVQPQQSP	VQPQ	28670	0.35			elongation factor 1-alpha 1	P68104	254-280	peptide-Arg266+Val-peptide	N	MS	Pro	Val	Gly	Arg	Val	Glu	Thr	Gly	Schilling & Overall, 2008
PVRGISIK	VRGI	724	26.36			Heterogeneous nuclear ribonucleoprotein U	Q8VEK3	2-800	peptide-His324+Leu-peptide	N	MS	Pro	Val	Arg	His	Leu	Tyr	Thr	Lys	Prudova et al., 2010
PVRHLYTK	VRHL	844	25.42			coatomer subunit alpha	P53621	912-941	peptide-His930+Ile-peptide	N	MS	Pro	Val	Asp	His	Ile	Leu	Ala	Gly	Schilling & Overall, 2008
PVSDLLAS	VSDL	1256	22.77			F-box-like/WD repeat-containing protein TBL1XR1	Q8BHJ5	1-514	peptide-Asp182+Leu-peptide	N	MS	Pro	Val	Ser	Asp	Leu	Leu	Ala	Ser	auf dem Keller et al., 2010
PVSELITK	VSEL	1067	24.1			histone H1.3	P16402	1960-07-01	peptide-Glu43+Leu-peptide	N	MS	Pro	Val	Ser	Glu	Leu	Ile	Thr	Lys	Schilling & Overall, 2008
PVSPLLLA	VSPL	414	29.25			creatine kinase M-type	P06732	182-209	peptide-Pro200+Leu-peptide	N	MS	Pro	Val	Ser	Pro	Leu	Leu	Leu	Ala	Schilling & Overall, 2008
PVSQLQSR	VSQL	1329	22.35			histone H1.2	P16403	1959-01-01	peptide-Glu42+Leu-peptide	N	MS	Pro	Val	Ser	Glu	Leu	Ile	Thr	Lys	Schilling & Overall, 2008
PVSRLVSL	VSRL	3347	14.29			F-box-like/WD repeat-containing protein TBL1X	Q9QXE7	1-527	peptide-Asp195+Leu-peptide	N	MS	Pro	Val	Ser	Asp	Leu	Leu	Ala	Ser	auf dem Keller et al., 2010
PVVAIRTA	VVAI	7059	5.65			Nucleoside diphosphate kinase B	Q01768	2-152	peptide-Ala75+Met-peptide	N	MS	Pro	Val	Val	Ala	Met	Val	Trp	Glu	auf dem Keller et al., 2010
PVVAMVWE	VVAM	3187	14.72			heterogeneous nuclear ribonucleoprotein L	P14866	95-111	peptide-His74+Ile-peptide	N	MS	Pro	Val	Val	His	Ile	Arg	Gly	Leu	Schilling & Overall, 2008
PVVHIRGL	VVHI	7807	4.65			Inositol monophosphatase 2	Q91UZ5	1-290	peptide-Asp54+Leu-peptide	N	MS	Ser	Ala	Ala	Asp	Leu	Val	Thr	Glu	auf dem Keller et al., 2010
PYAAMLAA	YAAM	841	25.43			Nuclease-sensitive element-binding protein 1	P62960	2-322	peptide-Arg202+Arg-peptide	N	MS	Pro	Tyr	Ala	Arg	Arg	Pro	Gln	Tyr	auf dem Keller et al., 2010
PYARRPQY	YARR	115422	0			Osteopontin	P10923	17-294	peptide-Gln194+Leu-peptide	N	MS	Pro	Val	Ala	Gln	Leu	Leu	Ser	Met	Prudova et al., 2010
-PYEIKKV	PYEI	6155	7.34			sorting nexin 2 variant	Q53GG3	346-362	SAA+MLGNSEDHTALSR	N	MS	-	Ser	Ala	Ala	Met	Leu	Gly	Asn	Schilling & Overall, 2008
QAAALTKN	AAAL	238	31.4			Adenylosuccinate lyase	P54822	2-484	peptide-Ala412+Val-peptide	N	MS	Gln	Ala	Ala	Ala	Val	Val	Lys	Gln	auf dem Keller et al., 2010
QAAAQTNS	AAAQ	5338	9.02			fractalkine	O35188	25-395	peptide-Ala95+Leu-peptide	P		Gln	Ala	Ala	Ala	Leu	Thr	Lys	Asn	Dean & Overall, 2007	20298
QAAAVVKQ	AAAV	9078	3.37			transitional endoplasmic reticulum ATPase	P55072	567-584	QAAP+CVLFFDELDSIAK	N	MS	Gln	Ala	Ala	Pro	Cys	Val	Leu	Phe	Schilling & Overall, 2008
QAAPCVLF	AAPC	61633	0.07			protein FAM136A	Q96C01	56-78	peptide-Ala66+Leu-peptide	N	MS	Gln	Ala	Gln	Ala	Leu	Val	Thr	Ser	Schilling & Overall, 2008
-QACLLAK	QACL	51664	0.11			heat shock 70 kDa protein 4L	O95757	378-392	QCA+ILSPAFKVREF	N	MS	-	Gln	Cys	Ala	Ile	Leu	Ser	Pro	Schilling & Overall, 2008
QAGQIKKL	AGQI	47267	0.13			Thioredoxin-like protein 1	Q8CDN6	2-289	peptide-Glu219+Leu-peptide	N	MS	Gln	Ala	Leu	Glu	Leu	Thr	Glu	Asp	auf dem Keller et al., 2010
QAKAVLSA	AKAV	26097	0.42			Inosine-5'-monophosphate dehydrogenase 2	P24547	1-514	peptide-Asn312+Leu-peptide	N	MS	Gln	Ala	Lys	Asn	Leu	Ile	Asp	Ala	auf dem Keller et al., 2010
QAKNLIDA	AKNL	2584	16.7			Phosphoglycerate kinase 2	P09041	2-417	peptide-Leu154+Ser-peptide	N	MS	Gln	Ala	Ser	Leu	Ser	Lys	Leu	Gly	auf dem Keller et al., 2010
QALELTED	ALEL	20695	0.64			Serpin H1	P19324	18-417	peptide-Ala94+Val-peptide	N	MS	Gln	Ala	Lys	Ala	Val	Leu	Ser	Ala	auf dem Keller et al., 2010
QAQALVTS	AQAL	1270	22.74			Nascent polypeptide-associated complex subunit alpha, muscle-specific form	P70670	2187-01-01	peptide-Leu2025+Ala-peptide	N	MS	Gln	Ala	Gln	Leu	Ala	Ala	Ala	Ala	Prudova et al., 2010
QAQLAAAA	AQLA	10510	2.42			Polymerase I and transcript release factor	O54724	1-392	peptide-Gln136+Ile-peptide	N	MS	Gln	Ala	Gly	Gln	Ile	Lys	Lys	Leu	auf dem Keller et al., 2010
QASLSKLG	ASLS	8050	4.36			cell proliferation-inducing protein 52	B1H0U5	229-257	peptide-Ala245+Val-peptide	N	MS	Gln	Asn	Ala	Ala	Val	Gln	Ala	Val	Schilling & Overall, 2008
-QCAILSP	QCAI	118537	0			heat shock 70 kDa protein 4	P34932	378-392	QCA+ILSPAFKVREF	N	MS	-	Gln	Cys	Ala	Ile	Leu	Ser	Pro	Schilling & Overall, 2008
--QDLMNI	-QDL					myosin regulatory light chain 2, smooth muscle isoform	P24844	51-63	ED+LHDMLASLGK	N	MS	-	-	Glu	Asp	Leu	His	Asp	Met	Schilling & Overall, 2008
QFEPIVSL	FEPI	63818	0.06			dynactin subunit 2	Q13561	337-365	peptide-Gln348+Leu-peptide	N	MS	Gln	Phe	Gly	Gln	Leu	Leu	Thr	His	Schilling & Overall, 2008
QFGEIEAI	FGEI	7812	4.65			Uncharacterized protein KIAA0802	Q3UHU5	1945-01-01	peptide-Leu319+Leu-peptide	N	MS	Gln	Pro	Arg	Leu	Leu	Val	Val	Ala	auf dem Keller et al., 2010
QFGQLLTH	FGQL	2434	17.22			Heterogeneous nuclear ribonucleoprotein A/B	Q99020	1-285	peptide-Glu184+Ile-peptide	N	MS	Gln	Phe	Gly	Glu	Ile	Glu	Ala	Ile	auf dem Keller et al., 2010
QGAHPADP	GAHP	86450	0			14-3-3 protein theta	P27348	139-158	QTIDNSQGAY+QEAFDISKK	N	MS	Gln	Gly	Ala	Tyr	Gln	Glu	Ala	Phe	Schilling & Overall, 2008
QGAYQEAF	GAYQ	55776	0.09			probable ATP-dependent RNA helicase DDX47	Q9H0S4	59-78	QGRD+IIGLAETGSGKTGAF	N	MS	Gln	Gly	Arg	Asp	Ile	Ile	Gly	Leu	Schilling & Overall, 2008
QGRDIIGL	GRDI	59711	0.08			Heat shock cognate 71 kDa protein	P63017	2-646	peptide-Lys25+Val-peptide	N	MS	Gln	His	Gly	Lys	Val	Glu	Ile	Ile	auf dem Keller et al., 2010
QHGKVEII	HGKV	54941	0.09			glutamate dehydrogenase 1 variant	Q59FQ4	246-264	FKLQHGS+ILGFPKAKPYE	N	MS	Gln	His	Gly	Ser	Ile	Leu	Gly	Phe	Schilling & Overall, 2008
QHGSILGF	HGSI	6542	6.53			glutamate dehydrogenase 2, mitochondrial precursor	P49448	350-368	FKLQHGS+ILGFPKAKPYE	N	MS	Gln	His	Gly	Ser	Ile	Leu	Gly	Phe	Schilling & Overall, 2008
QHGSLFLQ	HGSL	1783	19.92			fractalkine	O35188	25-395	peptide-Gly28+Met-peptide	P		Gln	His	Leu	Gly	Met	Thr	Lys	Cys	Dean & Overall, 2007	20297
QHLGMTKC	HLGM	10485	2.43			chemokine	Q91V44	1-395	peptide-Gly28+Met-peptide	N	MS	Gln	His	Leu	Gly	Met	Thr	Lys	Cys	Kleifeld et al., 2010
QIAAIHKD	IAAI	403	29.4			Far upstream element-binding protein 2	Q3U0V1	1-748	peptide-Ala87+Lys-peptide	N	MS	Gln	Ile	Ala	Ala	Lys	Ile	Gly	Gly	Prudova et al., 2010
QIAAKIGG	IAAK	21566	0.6			lamin-B1	P20700	167-182	DQIAQ+LEASLAAAKK	N	MS	Gln	Ile	Ala	Gln	Leu	Glu	Ala	Ser	Schilling & Overall, 2008
QIAQLEAS	IAQL	538	28.1			myosin-9	P35579	1357-1370	QIAT+LHAQVADMK	N	MS	Gln	Ile	Ala	Thr	Leu	His	Ala	Gln	Schilling & Overall, 2008
QIATLHAQ	IATL	1043	24.28			splicing factor 1	Q64213	2-653	peptide-Asn224+Ile-peptide	N	MS	Gln	Ile	Arg	Asn	Ile	Leu	Lys	Gln	Kleifeld et al., 2010
QIEELKGQ	IEEL	18677	0.78			lupus La protein	P05455	16-32	ICHQIEY+YFGDFNLPR	N	MS	Gln	Ile	Glu	Tyr	Tyr	Phe	Gly	Asp	Schilling & Overall, 2008
QIEYYFGD	IEYY	17164	0.91			Lupus La protein homolog	P32067	1-415	peptide-Tyr23+Tyr-peptide	N	MS	Gln	Ile	Glu	Tyr	Tyr	Phe	Gly	Asp	auf dem Keller et al., 2010
QIGDIVTV	IGDI	9169	3.29			S-methyl-5'-thioadenosine phosphorylase	Q9CQ65	2-283	peptide-Ser260+Met-peptide	N	MS	Gln	Ile	Gly	Ser	Met	Glu	Trp	Ser	auf dem Keller et al., 2010
QIGNVAAL	IGNV	4296	11.66			40S ribosomal protein S11	P62280	118-136	DVQIGD+IVTVGECRPLSK	N	MS	Gln	Ile	Gly	Asp	Ile	Val	Thr	Val	Schilling & Overall, 2008
QIGSMEWS	IGSM	808	25.76			beta-enolase	P13929	343-358	VNQIGS+VTESIQACK	N	MS	Gln	Ile	Gly	Ser	Val	Thr	Glu	Ser	Schilling & Overall, 2008
QIGSVTES	IGSV	7762	4.71			Nuclear migration protein nudC	O35685	1-332	peptide-Glu106+Leu-peptide	N	MS	Gln	Ile	Lys	Glu	Leu	Thr	Asp	Glu	auf dem Keller et al., 2010
QIKELTDE	IKEL	6934	5.86			LIM and SH3 domain protein 1	Q61792	1-263	peptide-Asn119+Ile-peptide	N	MS	Gln	Ile	Ser	Asn	Ile	Lys	Tyr	His	auf dem Keller et al., 2010
QIQELVEA	IQEL	4664	10.69			cDNA, FLJ94076, Homo sapiens proteasome	B2R8V1	193-209	QIQE+LVEAIVLPMNHK	N	MS	Gln	Ile	Gln	Glu	Leu	Val	Glu	Ala	Schilling & Overall, 2008
QIREIQGK	IREI	5861	7.92			SF3B1 protein	A0PJH5	1933-01-01	peptide-Glu17+Ile-peptide	N	MS	Gln	Ile	Arg	Glu	Ile	Gln	Gly	Lys	Schilling & Overall, 2008
QIRGLLLP	IRGL	367	29.81			eukaryotic translation initiation factor 5B	Q8N5A0	894-912	GPIVTQIRG+LLLPPPMKE	N	MS	Gln	Ile	Arg	Gly	Leu	Leu	Leu	Pro	Schilling & Overall, 2008
QIRNILKQ	IRNI	1466	21.53			putative uncharacterized protein	Q3TZI3	1-548	peptide-Asn224+Ile-peptide	N	MS	Gln	Ile	Arg	Asn	Ile	Leu	Lys	Gln	Kleifeld et al., 2010
QISNIKYH	ISNI	601	27.5			lIM and SH3 protein 1	A2A6G9	1-129	peptide-Asn83+Ile-peptide	N	MS	Gln	Ile	Ser	Asn	Ile	Lys	Tyr	His	Kleifeld et al., 2010
QISSLRDE	ISSL	375	29.71			dynactin subunit 2	Q13561	131-155	peptide-Ala144+Leu-peptide	N	MS	Gln	Leu	Ala	Ala	Leu	Lys	Gln	Gln	Schilling & Overall, 2008
QKAQMVQE	KAQM	49003	0.12			Nucleobindin-1	Q02819	26-459	peptide-Glu387+Leu-peptide	N	MS	Gln	Lys	Arg	Glu	Leu	Gln	Gln	Ala	auf dem Keller et al., 2010
QKGDAGAP	KGDA	114725	0			T-complex protein 1 subunit epsilon	P48643	183-201	QMAE+IAVNAVLTVADMER	N	MS	Gln	Met	Ala	Glu	Ile	Ala	Val	Asn	Schilling & Overall, 2008
QKRELQQA	KREL	11956	1.86			collagen alpha-1(II) chain	P02458	182-1241	peptide-Asp859+Ala-peptide	P	MS	Gln	Lys	Gly	Asp	Ala	Gly	Ala	Pro	Zhen et al., 2008	22633
QLAALKQQ	LAAL	173	32.24			Ribosome-binding protein 1	Q99PL5	1-1605	peptide-Arg1000+Leu-peptide	N	MS	Gln	Leu	Ala	Arg	Leu	Gln	Gln	Glu	Prudova et al., 2010
QLAEAHAQ	LAEA	76166	0.04			Bifunctional purine biosynthesis protein PURH	Q9CWJ9	1-592	peptide-Leu8+Phe-peptide	N	MS	Gln	Leu	Ala	Leu	Phe	Ser	Val	Ser	auf dem Keller et al., 2010
QLALFSVS	LALF	45160	0.14			protein disulfide-isomerase precursor	P07237	401-424	peptide-Pro405+Ile-peptide	N	MS	Gln	Leu	Ala	Pro	Ile	Trp	Asp	Lys	Schilling & Overall, 2008
QLAPIWDK	LAPI	1308	22.49			40S ribosomal protein S7	P62082	1-194	peptide-Glu42+Leu-peptide	N	MS	Gln	Leu	Arg	Glu	Leu	Asn	Ile	Thr	Prudova et al., 2010
QLAQATGK	LAQA	41678	0.17			macrophage migration inhibitory factor	P14174	20-37	SE+LTQQLAQATGKPPQY	N	MS	-	-	Ser	Glu	Leu	Thr	Gln	Gln	Schilling & Overall, 2008
QLAQIAAE	LAQI	2320	17.71			rho GDP-dissociation inhibitor 1	Q99PT1	2-204	peptide-Gln13+Ile-peptide	N	MS	Gln	Leu	Ala	Gln	Ile	Ala	Ala	Glu	Kleifeld et al., 2010
QLAQIDGT	LAQI	2320	17.71			threonyl-tRNA synthetase, cytoplasmic	P26639	663-679	NAQLAQ+YNFILVVGEK	N	MS	Gln	Leu	Ala	Gln	Tyr	Asn	Phe	Ile	Schilling & Overall, 2008
QLAQYNFI	LAQY	2290	17.82			Plectin, Isoform PLEC-1	Q9QXS1-2	4686-01-01	peptide-Glu1517+Ala-peptide	N	MS	Gln	Leu	Ala	Glu	Ala	His	Ala	Gln	auf dem Keller et al., 2010
QLARLQQE	LARL	1509	21.32			macrophage migration inhibitory factor	P14174	22-45	peptide-Gln29+Ala-peptide	N	MS	Gln	Leu	Ala	Gln	Ala	Thr	Gly	Lys	Schilling & Overall, 2008
QLDDLKVE	LDDL	37919	0.2			similar to 60S ribosomal protein L35	A4D2M5	18-31	QLDD+LKVELSQLR	N	MS	Gln	Leu	Asp	Asp	Leu	Lys	Val	Glu	Schilling & Overall, 2008
QLEGLQST	LEGL	5090	9.56			small nuclear ribonucleoprotein E	P62304	63-92	peptide-Arg76+Ile-peptide	N	MS	Gln	Leu	Gly	Arg	Ile	Met	Leu	Lys	Schilling & Overall, 2008
QLGRIMLK	LGRI	4162	12.01			pregnancy zone protein	P20742	26-1482	peptide-Thr718+Tyr-peptide	P		Gln	Leu	Gly	Thr	Tyr	Asn	Val	Ile	Arbelez et al., 1997	3222
QLGTYNVI	LGTY	6426	6.75			collagen alpha-1(II) chain	P02458	182-1241	peptide-Val198+Met-peptide	P	MS	Gln	Leu	Gly	Val	Met	Gln	Gly	Pro	Zhen et al., 2008	22907
QLGVMQGP	LGVM	7712	4.76			Dickkopf-related protein 3	Q9QUN9	23-349	peptide-Asp250+Leu-peptide	N	MS	Gln	Leu	Leu	Asp	Leu	Ile	Thr	Trp	auf dem Keller et al., 2010
QLKEVWEE	LKEV	75055	0.04			Endophilin-A2	Q62419	1-368	peptide-Ala217+Leu-peptide	N	MS	Gln	Leu	Ser	Ala	Leu	Val	Asp	Ala	auf dem Keller et al., 2010
QLKRWIGS	LKRW	110284	0			Nucleobindin-1	Q02819	26-459	peptide-Glu229+Val-peptide	N	MS	Gln	Leu	Lys	Glu	Val	Trp	Glu	Glu	auf dem Keller et al., 2010
QLLDLITW	LLDL	28443	0.35			Ezrin	P26040	2-586	peptide-Thr533+Leu-peptide	N	MS	Gln	Leu	Leu	Thr	Leu	Ser	Asn	Glu	auf dem Keller et al., 2010
QLLTLSNE	LLTL	47954	0.13			Protein phosphatase 1 regulatory subunit 12A	Q9DBR7	1-1029	peptide-Arg16+Trp-peptide	N	MS	Gln	Leu	Lys	Arg	Trp	Ile	Gly	Ser	auf dem Keller et al., 2010
QLQALSSE	LQAL	584	27.71			nucleobindin-1	Q02819	26-459	peptide-Glu404+Gln-peptide	N	MS	Gln	Leu	Gln	Glu	Gln	Ser	Ala	Pro	Kleifeld et al., 2010
QLQELQVK	LQEL	3965	12.49			Mitochondrial import inner membrane translocase subunit Tim8 A	Q9WVA2	1997-01-01	peptide-His21+Phe-peptide	N	MS	Gln	Leu	Gln	His	Phe	Ile	Glu	Val	Prudova et al., 2010
QLQEQSAP	LQEQ	65548	0.06			Myosin-9	Q8VDD5	1960-02-01	peptide-Glu1256+Leu-peptide	N	MS	Gln	Leu	Gln	Glu	Leu	Gln	Val	Lys	auf dem Keller et al., 2010
QLQHFIEV	LQHF	3537	13.69			uncharacterized protein EDC4	A6NGM1	974-992	LCTQLEG+LQSTVTGHVER	N	MS	Gln	Leu	Glu	Gly	Leu	Gln	Ser	Thr	Schilling & Overall, 2008
QLRELNIT	LREL	1468	21.53			60S ribosomal protein L35	P42766	19-32	QLDD+LKVELSQLR	N	MS	Gln	Leu	Asp	Asp	Leu	Lys	Val	Glu	Schilling & Overall, 2008
QLSALVDA	LSAL	112	32.9			cell division cycle and apoptosis regulator protein 1	Q8IX12	167-189	peptide-Ala174+Val-peptide	N	MS	Gln	Leu	Ser	Ala	Val	Lys	Gly	Lys	Schilling & Overall, 2008
QLSAVKGK	LSAV	6684	6.28			rhabdomyosarcoma antigen MU-RMS-4012.	Q3BDU5	300-317	SLSAQLSQ+LQKQLAAKE	N	MS	Gln	Leu	Ser	Gln	Leu	Gln	Lys	Gln	Schilling & Overall, 2008
QLSPLKGL	LSPL	491	28.54			V-type proton ATPase subunit S1	Q9R1Q9	33-463	peptide-Thr70+Tyr-peptide	N	MS	Gln	Leu	Ser	Thr	Tyr	Leu	Asp	Pro	auf dem Keller et al., 2010
QLSQLQKQ	LSQL	1109	23.82			prelamin-A/C	P48678	1-662	peptide-Gln308+Leu-peptide	N	MS	Gln	Leu	Ser	Gln	Leu	Gln	Lys	Gln	Kleifeld et al., 2010
QLSTYLDP	LSTY	8590	3.78			Moesin	P26041	2-577	peptide-Gln450+Met-peptide	N	MS	Gln	Lys	Ala	Gln	Met	Val	Gln	Glu	auf dem Keller et al., 2010
QMAEIAVN	MAEI	2819	15.83			splicing factor arginine/serine-rich 11	Q05519	47-61	QMRT+LFGFLGKIDE	N	MS	Gln	Met	Arg	Thr	Leu	Phe	Gly	Phe	Schilling & Overall, 2008
QMGPLIDE	MGPL	2292	17.82			Switch-associated protein 70	Q6A028	1-585	peptide-Glu343+Leu-peptide	N	MS	Gln	Met	Lys	Glu	Leu	Gln	Ala	Ala	auf dem Keller et al., 2010
QMKELQAA	MKEL	8102	4.28			ran-specific GTPase-activating protein	P34022	2-203	peptide-Pro29+Ile-peptide	N	MS	Gln	Phe	Glu	Pro	Ile	Val	Ser	Leu	Kleifeld et al., 2010
QMNYIQVT	MNYI	8163	4.21			Signal transducing adapter molecule 1	P70297	2-548	peptide-Pro341+Leu-peptide	N	MS	Gln	Met	Gly	Pro	Leu	Ile	Asp	Glu	auf dem Keller et al., 2010
QMRTLFGF	MRTL	4057	12.29			UV excision repair protein RAD23 homolog A	P54726	1-363	peptide-Tyr313+Ile-peptide	N	MS	Gln	Met	Asn	Tyr	Ile	Gln	Val	Thr	auf dem Keller et al., 2010
QNAAVQAV	NAAV	75896	0.04			cDNA, FLJ92546, highly similar to Homo sapiens inner membrane protein, mitochondrial	B2R5N6	229-257	peptide-Ala245+Val-peptide	N	MS	Gln	Asn	Ala	Ala	Val	Gln	Ala	Val	Schilling & Overall, 2008
--QNIIPA	-QNI					UV excision repair protein RAD23 homolog A	P54725	241-258	QN+MRQVIQQNPALLPAL	N	MS	-	-	Gln	Asn	Met	Arg	Gln	Val	Schilling & Overall, 2008
--QNMRQV	-QNM					T-complex protein 1 subunit beta	P78371	156-170	QD+LMNIAGTTLSSK	N	MS	-	-	Gln	Asp	Leu	Met	Asn	Ile	Schilling & Overall, 2008
QPCGVYSP	PCGV	23330	0.51			adenosine deaminase, RNA-specific isoform ADAR-a variant	Q59EC0	696-730	peptide-Gly714+Met-peptide	N	MS	Gln	Pro	Glu	Gly	Met	Ile	Ser	Glu	Schilling & Overall, 2008
QPEGMISE	PEGM	1784	19.92			drebrin-like protein variant	Q59FH4	193-222	peptide-Lys208+Leu-peptide	N	MS	Gln	Pro	Gly	Lys	Leu	Arg	Ser	Pro	Schilling & Overall, 2008
QPGKLRSP	PGKL	561	27.98			heat shock 70kDa protein 8 isoform 2 variant	Q53HF2	423-447	peptide-Val438+Leu-peptide	N	MS	Gln	Pro	Gly	Val	Leu	Ile	Gln	Val	Schilling & Overall, 2008
QPGVLIQV	PGVL	7564	4.94			cDNA FLJ77848	A8K7Q2	187-211	peptide-Val202+Leu-peptide	N	MS	Gln	Pro	Gly	Val	Leu	Ile	Gln	Val	Schilling & Overall, 2008
QPHDLGKV	PHDL	2516	16.94			cDNA, FLJ92534, highly similar to Homo sapiens heat shock 60kDa protein 1	B2R5M6	334-358	peptide-Asp341+Leu-peptide	N	MS	Gln	Pro	His	Asp	Leu	Gly	Lys	Val	Schilling & Overall, 2008
QPKNLEGY	PKNL	125	32.8			mKIAA4020 protein	Q5DTS3	1-391	peptide-Asn16+Leu-peptide	N	MS	Gln	Pro	Lys	Asn	Leu	Glu	Gly	Tyr	Kleifeld et al., 2010
QPLLLSED	PLLL	2997	15.27			fibronectin	P02751	32-2386	peptide-Val1625+Gln-peptide	P	MS	Gln	Pro	Leu	Val	Gln	Thr	Ala	Val	Doucet & Overall, 2010
QPLQLLDA	PLQL	336	30.1			3-mercaptopyruvate sulfurtransferase	P25325	24-40	AGQPLQ+LLDASWYLPK	N	MS	Gln	Pro	Leu	Gln	Leu	Leu	Asp	Ala	Schilling & Overall, 2008
QPLVQTAV	PLVQ	16045	1.04			fibronectin isoform 8	P02751-8	32-2296	peptide-Val+Gln-peptide	P	MS	Gln	Pro	Leu	Val	Gln	Thr	Ala	Val	Doucet & Overall, 2010
QPMPASSP	PMPA	119760	0			poly(rC)-binding protein 1	P60335	1-356	peptide-Pro187+Ala-peptide	N	MS	Gln	Pro	Met	Pro	Ala	Ser	Ser	Pro	Kleifeld et al., 2010
QPPGLKVW	PPGL	1031	24.36			cDNA FLJ77233, highly similar to Homo sapiens Rho GTPase activating protein 17	A8K6M6	806-835	peptide-Gly817+Val-peptide	N	MS	Gln	Pro	Pro	Gly	Val	His	Ser	Ala	Schilling & Overall, 2008
QPPGVHSA	PPGV	22387	0.56			BAG family molecular chaperone regulator 3	O95817	213-239	peptide-Phe225+His-peptide	N	MS	Gln	Pro	Ser	Phe	His	Gln	Ala	Gln	Schilling & Overall, 2008
QPRLLVVA	PRLL	1192	23.26			insulin-like growth factor-binding protein 6	P47880	26-238	peptide-Gly73+Val-peptide	N	MS	Gln	Pro	Cys	Gly	Val	Tyr	Ser	Pro	Kleifeld et al., 2010
QPSFHQAQ	PSFH	20418	0.66			Actin, cytoplasmic 1	P60710	2-375	peptide-Phe266+Leu-peptide	N	MS	Gln	Pro	Ser	Phe	Leu	Gly	Met	Glu	auf dem Keller et al., 2010
QPSFLGME	PSFL	387	29.54			Eukaryotic translation initiation factor 4B	Q8BGD9	1-611	peptide-Pro505+Thr-peptide	N	MS	Gln	Pro	Ser	Pro	Thr	Ser	Gly	Gly	auf dem Keller et al., 2010
QPSPTSGG	PSPT	17638	0.87			transketolase	P29401	223-255	peptide-Ala237+Ile-peptide	N	MS	Gln	Pro	Thr	Ala	Ile	Ile	Ala	Lys	Schilling & Overall, 2008
QPTAIIAK	PTAI	480	28.62			Septin-2	P42208	1-361	peptide-Gln8+Phe-peptide	N	MS	Gln	Pro	Thr	Gln	Phe	Ile	Asn	Pro	auf dem Keller et al., 2010
QPTQFINP	PTQF	32097	0.28			C-C motif chemokine 7	P80098	24-99	peptide-Gly27+Ile-peptide	P		Gln	Pro	Val	Gly	Ile	Asn	Thr	Ser	McQuibban et al., 2002	18381
QPVGINTS	PVGI	65	33.53			10 kDa heat shock protein, mitochondrial	P61604	59-75	IQPVS+VKVGDKVLLPE	N	MS	Gln	Pro	Val	Ser	Val	Lys	Val	Gly	Schilling & Overall, 2008
QPVSVKVG	PVSV	2211	18.14			T-complex protein 1 subunit gamma	P80318	1-545	peptide-Asn26+Ile-peptide	N	MS	Gln	Ser	Gly	Asn	Ile	Asn	Ala	Ala	auf dem Keller et al., 2010
QQAQLAAA	QAQL	6753	6.16			Nascent polypeptide-associated complex subunit alpha, muscle-specific form	P70670-1	2187-01-01	peptide-Gln2024+Leu-peptide	N	MS	Gln	Gln	Ala	Gln	Leu	Ala	Ala	Ala	auf dem Keller et al., 2010
QQGAIGSP	QGAI	11730	1.94			mitochondrial precursor proteins import receptor	O94826	217-238	peptide-Met225+Leu-peptide	N	MS	Gln	Gln	Ser	Met	Leu	Leu	Ala	Asp	Schilling & Overall, 2008
-QQRLIFA	QQRL	74175	0.04			ubiquitin	P62988	39-51	QQR+LIFAGKQLE	N	MS	-	Gln	Gln	Arg	Leu	Ile	Phe	Ala	Schilling & Overall, 2008
QQSMLLAD	QSML	20164	0.68			myelin basic protein isoform 2	P04370-2	1-190	peptide-His81+Pro-peptide	P	MS	Gln	Gly	Ala	His	Pro	Ala	Asp	Pro	Shiryaev et al., 2009	25423
QSGNINAA	SGNI	13499	1.46			Huntingtin-interacting protein K	Q9CR41	1-129	peptide-Asn59+Leu-peptide	N	MS	Gln	Ser	Ser	Asn	Leu	Glu	Thr	Ala	Prudova et al., 2010
QSSNLETA	SSNL	2036	18.88			pyruvate kinase	Q504U3	1932-03-01	peptide-Gln17+Leu-peptide	N	MS	Gln	Thr	Gln	Gln	Leu	His	Ala	Ala	Schilling & Overall, 2008
QTGDLDQN	TGDL	13533	1.45			alanyl-tRNA synthetase, cytoplasmic	P49588	879-898	MHSPQTSA+MLFTVDNEAGK	N	MS	Gln	Thr	Ser	Ala	Met	Leu	Phe	Thr	Schilling & Overall, 2008
QTQQLHAA	TQQL	72785	0.05			Pyruvate kinase isozymes M1/M2	P52480	2-531	peptide-Gln17+Leu-peptide	N	MS	Gln	Thr	Gln	Gln	Leu	His	Ala	Ala	Prudova et al., 2010
QTSAMLFT	TSAM	3954	12.51			Heterogeneous nuclear ribonucleoproteins A2/B1	O88569	1-353	peptide-Lys46+Leu-peptide	N	MS	Gln	Trp	Gly	Lys	Leu	Thr	Asp	Cys	auf dem Keller et al., 2010
QVAAAAAA	VAAA	6077	7.52			Dynactin subunit 1, isoform 5	Q14203-5	1048-1061	QVAQ+LKSLSDTVE	N	MS	Gln	Val	Ala	Gln	Leu	Lys	Ser	Leu	Schilling & Overall, 2008
QVAEIVAT	VAEI	2597	16.67			cDNA, FLJ95045, highly similar to Homo sapiens vesicle docking protein p115	B2RAQ0	782-798	DSEQVAE+LKQELATLK	N	MS	Gln	Val	Ala	Glu	Leu	Lys	Gln	Glu	Schilling & Overall, 2008
QVAELKQE	VAEL	570	27.87			General vesicular transport factor p115 isoform 2	O60763-2	793-809	DSEQVAE+LKQELATLK	N	MS	Gln	Val	Ala	Glu	Leu	Lys	Gln	Glu	Schilling & Overall, 2008
QVAGMSET	VAGM	596	27.56			myosin-9	P35579	617-637	IIGLDQVAG+MSETALPGAFK	N	MS	Gln	Val	Ala	Gly	Met	Ser	Glu	Thr	Schilling & Overall, 2008
QVAQLKSL	VAQL	523	28.25			leucine zipper-EF-hand-containing transmembrane protein 1, mitochondrial precursor	O95202	697-719	peptide-Glu709+Ile-peptide	N	MS	Gln	Val	Ala	Glu	Ile	Val	Ala	Thr	Schilling & Overall, 2008
QVATISAN	VATI	2648	16.47			Nuclear mitotic apparatus protein 1	Q80Y35	2094-01-01	peptide-Ser1664+Leu-peptide	N	MS	Gln	Val	Arg	Ser	Leu	Glu	Ala	Gln	Prudova et al., 2010
QVENLASS	VENL	3440	13.94			HUMEEP	Q7Z524	66-86	DPSQVEN+LASSLQLITECFR	N	MS	Gln	Val	Glu	Asn	Leu	Ala	Ser	Ser	Schilling & Overall, 2008
QVGMACAI	VGMA	27577	0.38			Ribosome-binding protein 1	Q99PL5	1-1605	peptide-Gln1071+Leu-peptide	N	MS	Gln	Val	Leu	Gln	Leu	Gln	Ala	Ser	Prudova et al., 2010
QVLGIGSG	VLGI	1664	20.59			Protein SET	Q9EQU5	1-289	peptide-Ala106+Leu-peptide	N	MS	Gln	Val	Ser	Ala	Leu	Leu	Gly	Glu	Prudova et al., 2010
QVLQLQAS	VLQL	9583	3.01			Ribose-5-phosphate isomerase	P47968	1-303	peptide-Gly94+Ile-peptide	N	MS	Gln	Val	Leu	Gly	Ile	Gly	Ser	Gly	auf dem Keller et al., 2010
QVQFKLVL	VQFK	108236	0			vimentin	P08670	321-334	QVQS+LTCEVDALK	N	MS	Gln	Val	Gln	Ser	Leu	Thr	Cys	Glu	Schilling & Overall, 2008
QVQRLLAE	VQRL	3803	12.93			GTP-binding nuclear protein Ran	P62827	2-216	peptide-Phe11+Lys-peptide	N	MS	Gln	Val	Gln	Phe	Lys	Leu	Val	Leu	auf dem Keller et al., 2010
QVQSLTCE	VQSL	1117	23.77			vimentin	P20152	2-466	peptide-Ser325+Leu-peptide	N	MS	Gln	Val	Gln	Ser	Leu	Thr	Cys	Glu	Kleifeld et al., 2010
QVRSLEAQ	VRSL	4049	12.31			Catalase	P24270	2-527	peptide-Thr445+Phe-peptide	N	MS	Gln	Val	Arg	Thr	Phe	Tyr	Thr	Lys	auf dem Keller et al., 2010
QVRTFYTK	VRTF	47990	0.13			Elongation factor 1-gamma	Q9D8N0	2-437	peptide-Val31+Leu-peptide	N	MS	Gln	Val	Arg	Val	Leu	Ser	Ala	Pro	Prudova et al., 2010
QVRVLSAP	VRVL	13114	1.54			Phosphoserine phosphatase	Q99LS3	1-225	peptide-Arg78+Leu-peptide	N	MS	Gln	Val	Gln	Arg	Leu	Leu	Ala	Glu	auf dem Keller et al., 2010
QVSALLGE	VSAL	163	32.34			sET translocation	Q3T9S3	1-289	peptide-Ala106+Leu-peptide	N	MS	Gln	Val	Ser	Ala	Leu	Leu	Gly	Glu	Kleifeld et al., 2010
QVSGLMDG	VSGL	207	31.77			cDNA, FLJ92534, highly similar to Homo sapiens heat shock 60kDa protein 1	B2R5M6	292-310	VGLQVVA+VKAPGFGDNRK	N	MS	Gln	Val	Val	Ala	Val	Lys	Ala	Pro	Schilling & Overall, 2008
QVSRYRVT	VSRY	2426	17.26			alanyl-tRNA synthetase, cytoplasmic	P49588	918-950	peptide-Gly925+Leu-peptide	N	MS	Gln	Val	Ser	Gly	Leu	Met	Asp	Gly	Schilling & Overall, 2008
QVVAVKAP	VVAV	82958	0			60 kDa heat shock protein, mitochondrial	P63038	27-573	peptide-Ala299+Val-peptide	N	MS	Gln	Val	Val	Ala	Val	Lys	Ala	Pro	auf dem Keller et al., 2010
QWGKLTDC	WGKL	12082	1.82			Activated RNA polymerase II transcriptional coactivator p15	P11031	2-127	peptide-Gln112+Leu-peptide	N	MS	Gln	Trp	Ser	Gln	Leu	Lys	Glu	Gln	auf dem Keller et al., 2010
QWSQLKEQ	WSQL	10929	2.23			Dynein light chain roadblock-type 1	P62627	1996-02-01	peptide-Asn44+Leu-peptide	N	MS	Gln	Tyr	Ala	Asn	Leu	Met	His	Asn	auf dem Keller et al., 2010
-QYAMRAF	QYAM	110380	0			cDNA FLJ46889 fis, clone UTERU3017995, highly similar to Homo sapiens likely ortholog of rat p47	Q6ZQU3	129-141	EAN+LLNAVIVQR	N	MS	-	Glu	Ala	Asn	Leu	Leu	Asn	Ala	Schilling & Overall, 2008
QYANLMHN	YANL	579	27.75			Heat shock protein HSP 90-alpha	P07901	2-733	peptide-Trp162+Glu-peptide	N	MS	Gln	Tyr	Ala	Trp	Glu	Ser	Ser	Ala	auf dem Keller et al., 2010
QYAWESSA	YAWE	88206	0			BAG family molecular chaperone regulator 3	O95817	149-170	peptide-Ala156+Ala-peptide	N	MS	Gln	Val	Ala	Ala	Ala	Ala	Ala	Ala	Schilling & Overall, 2008
RAASIFGG	AASI	2649	16.47			Elongation factor 2	P58252	2-858	peptide-Tyr634+Leu-peptide	N	MS	Arg	Ala	Arg	Tyr	Leu	Ala	Glu	Lys	auf dem Keller et al., 2010
RACRLAKA	ACRL	36687	0.22			Nucleobindin-1	Q02819	26-459	peptide-Arg366+Leu-peptide	N	MS	Arg	Ala	Gln	Arg	Leu	Ser	Gln	Glu	auf dem Keller et al., 2010
RAFHNEAQ	AFHN	92540	0			Thrombospondin-2	Q03350	1-1172	peptide-Ala18+Gly-peptide	N	MS	Arg	Ala	Ser	Ala	Gly	Asp	His	Val	Prudova et al., 2010
RAFQVWSD	AFQV	105758	0			T-complex protein 1 subunit alpha	P11983	1-556	peptide-His471+Asn-peptide	N	MS	Arg	Ala	Phe	His	Asn	Glu	Ala	Gln	auf dem Keller et al., 2010
RAGDWKCP	AGDW	98185	0			SP-A receptor subunit SP-R210 alphaS	Q5QD01	506-534	peptide-Ser522+Ala-peptide	N	MS	Arg	Ala	Gly	Ser	Ala	Thr	Val	Leu	Schilling & Overall, 2008
RAGSATVL	AGSA	86050	0			hyaluronan and proteoglycan link protein 1	P10915	16-354	peptide-His31+Ile-peptide	P		Arg	Ala	Ile	His	Ile	Gln	Ala	Glu	Nguyen et al., 1993	18126
RAIFLADG	AIFL	36214	0.22			Phosphoglycerate mutase 1	Q9DBJ1	2-254	peptide-Pro165+Phe-peptide	N	MS	Arg	Ala	Leu	Pro	Phe	Trp	Asn	Glu	auf dem Keller et al., 2010
RAIHIQAE	AIHI	7766	4.71			Coronin-1B	Q9WUM3	1-484	peptide-Phe228+Leu-peptide	N	MS	Arg	Ala	Ile	Phe	Leu	Ala	Asp	Gly	auf dem Keller et al., 2010
RAKAMKTK	AKAM	3055	15.1			nascent polypeptide-associated complex subunit alpha	Q13765	182-212	peptide-Ala195+Val-peptide	N	MS	Arg	Ala	Lys	Ala	Val	Arg	Ala	Leu	Schilling & Overall, 2008
RAKAVRAL	AKAV	26097	0.42			nascent polypeptide-associated complex subunit alpha-2	Q9H009	180-212	peptide-Ala195+Val-peptide	N	MS	Arg	Ala	Lys	Ala	Val	Arg	Ala	Leu	Schilling & Overall, 2008
RAKLIISS	AKLI	17615	0.87			Proteasome subunit beta type-1	O09061	28-240	peptide-Arg200+Leu-peptide	N	MS	Arg	Ala	Met	Arg	Leu	Val	Lys	Asp	auf dem Keller et al., 2010
--RALKAV	-RAL					Interleukin enhancer-binding factor 3 isoform 4	Q12906-4	1-698	RA+LKAVSDWIDE	N	MS	-	-	Arg	Ala	Leu	Lys	Ala	Val	Schilling & Overall, 2008
RALPFWNE	ALPF	4743	10.46			P37 AUF1	Q12771	138-174	peptide-Ala153+Met-peptide	N	MS	Arg	Ala	Lys	Ala	Met	Lys	Thr	Lys	Schilling & Overall, 2008
RAMRLVKD	AMRL	36069	0.22			72 kDa type IV collagenase	P08253	110-660	peptide-Gln149+Val-peptide	P	MS	Arg	Ala	Phe	Gln	Val	Trp	Ser	Asp	auf dem Keller et al., 2010
RANHLNKL	ANHL	4812	10.28			14-3-3 protein epsilon	P62258	189-205	RACR+LAKAAFDDAIAE	N	MS	Arg	Ala	Cys	Arg	Leu	Ala	Lys	Ala	Schilling & Overall, 2008
RAQRLSQE	AQRL	19487	0.72			RNA-binding protein FUS	P56959	1-518	peptide-Asp418+Trp-peptide	N	MS	Arg	Ala	Gly	Asp	Trp	Lys	Cys	Pro	auf dem Keller et al., 2010
RARYLAEK	ARYL	4742	10.46			protein-glutamine gamma-glutamyltransferase 2 isoform a	P21980	2-687	peptide-His461+Leu-peptide	P		Arg	Ala	Asn	His	Leu	Asn	Lys	Leu	Belkin et al., 2004	18841
RASAGDHV	ASAG	60387	0.08			FACT complex subunit SPT16	Q9Y5B9	600-622	peptide-Asn604+Ile-peptide	N	MS	Arg	Ala	Ser	Asn	Ile	Lys	Ala	Pro	Schilling & Overall, 2008
RASDYKSA	ASDY	18627	0.78			Clusterin	Q06890	22-448	peptide-Gly184+Ile-peptide	N	MS	Arg	Ala	Ser	Gly	Ile	Ile	Asp	Thr	auf dem Keller et al., 2010
RASGIIDT	ASGI	3515	13.76			Phosphoglycerate kinase 1	P09411	2-417	peptide-Leu154+Ser-peptide	N	MS	Arg	Ala	Ser	Leu	Ser	Lys	Leu	Gly	auf dem Keller et al., 2010
RASLSKLG	ASLS	8050	4.36			EF-hand domain-containing protein D2	Q9D8Y0	2-240	peptide-Asp64+Leu-peptide	N	MS	Arg	Arg	Ala	Asp	Leu	Asn	Gln	Gly	Prudova et al., 2010
RASNIKAP	ASNI	2102	18.59			myelin basic protein isoform 1	P02686	135-304	peptide-Asp134+Tyr-peptide	P	MS	Arg	Ala	Ser	Asp	Tyr	Lys	Ser	Ala	Shiryaev et al., 2009	25390
RCAHIEAK	CAHI	55194	0.09			Lamin-B1	P14733	2-588	peptide-Ser201+Leu-peptide	N	MS	Arg	Cys	Gln	Ser	Leu	Thr	Glu	Asp	auf dem Keller et al., 2010
RCARCSKT	CARC	151325	0			Nucleosome assembly protein 1-like 4	Q78ZA7	2-375	peptide-His79+Ile-peptide	N	MS	Arg	Cys	Ala	His	Ile	Glu	Ala	Lys	auf dem Keller et al., 2010
RCQSLTED	CQSL	14778	1.23			Macrophage-capping protein	P24452	1-352	peptide-Ala313+Leu-peptide	N	MS	Arg	Gln	Ala	Ala	Leu	Gln	Val	Ala	auf dem Keller et al., 2010
--RDPSKI	-RDP					full-length cDNA 5-PRIME end of clone CS0DN005YI08 of Adult brain of Homo sapiens	Q86SX1	167-183	RE+LISNSSDALDKIRY	N	MS	-	-	Arg	Glu	Leu	Ile	Ser	Asn	Schilling & Overall, 2008
--RELISN	-REL					replication factor C subunit 5	P40937	31-47	ND+LISHQDILSTIQKF	N	MS	-	-	Asn	Asp	Leu	Ile	Ser	His	Schilling & Overall, 2008
RELISNAS	ELIS	13910	1.38			Lamin-B1	P14733	2-588	peptide-Glu75+Leu-peptide	N	MS	Arg	Gly	Arg	Glu	Leu	Thr	Gly	Leu	auf dem Keller et al., 2010
RFDEILEA	FDEI	138599	0			Heat shock cognate 71 kDa protein	P63017	2-646	peptide-Glu304+Leu-peptide	N	MS	Arg	Phe	Glu	Glu	Leu	Asn	Ala	Asp	auf dem Keller et al., 2010
RFEELNAD	FEEL	137346	0			72 kDa type IV collagenase	P08253	110-660	peptide-Arg161+Ile-peptide	P	MS	Arg	Phe	Ser	Arg	Ile	His	Asp	Gly	auf dem Keller et al., 2010
RFSNISAA	FSNI	2810	15.87			nuclear pore complex protein Nup153	P49790	597-612	RPAE+ILKEGSVLDIL	N	MS	Arg	Pro	Ala	Glu	Ile	Leu	Lys	Glu	Schilling & Overall, 2008
RFSRIHDG	FSRI	28778	0.35			T-complex protein 1 subunit delta	P80315	2-539	peptide-Asn37+Ile-peptide	N	MS	Arg	Phe	Ser	Asn	Ile	Ser	Ala	Ala	Prudova et al., 2010
RGENLVSM	GENL	49822	0.12			myelin basic protein isoform 1	P02686	135-304	peptide-Ser111+Leu-peptide	P	MS	Arg	Gly	Leu	Ser	Leu	Ser	Arg	Phe	Shiryaev et al., 2009	25389
RGLSLSRF	GLSL	39908	0.18			116 kDa U5 small nuclear ribonucleoprotein component	Q15029	172-198	peptide-Gly180+Ile-peptide	N	MS	Arg	Gly	Val	Gly	Ile	Lys	Ser	Thr	Schilling & Overall, 2008
RGNLYWTD	GNLY	19604	0.71			Small nuclear ribonucleoprotein-associated protein B	P27048	1-231	peptide-Asn76+Leu-peptide	N	MS	Arg	Gly	Glu	Asn	Leu	Val	Ser	Met	auf dem Keller et al., 2010
RGRELTGL	GREL	41559	0.17			Nidogen-1	P10493	29-1245	peptide-Leu1076+Tyr-peptide	N	MS	Arg	Gly	Asn	Leu	Tyr	Trp	Thr	Asp	auf dem Keller et al., 2010
RGVGIKST	GVGI	58885	0.08			Actin, gamma-enteric smooth muscle	P63268	3-376	peptide-Gly43+Val-peptide	N	MS	Arg	His	Gln	Gly	Val	Met	Val	Gly	auf dem Keller et al., 2010
RHLALKAF	HLAL	4406	11.36			RcDNAJ9	Q2VIL4	147-173	peptide-Asn153+Ile-peptide	N	MS	Arg	Ile	Arg	Asn	Ile	Ile	Gln	Gln	Schilling & Overall, 2008
RHQGVMVG	HQGV	103617	0			Actin, aortic smooth muscle	P62737	3-377	peptide-Gly44+Val-peptide	N	MS	Arg	His	Gln	Gly	Val	Met	Val	Gly	auf dem Keller et al., 2010
RICKVLAV	ICKV	154437	0			Phosphoserine aminotransferase	Q99K85	1-370	peptide-Asn309+Ala-peptide	N	MS	Arg	Ile	Gly	Asn	Ala	Lys	Gly	Asp	auf dem Keller et al., 2010
RIGNAKGD	IGNA	29221	0.34			Filamin-B	Q80X90	2602-01-01	peptide-Asn39+Leu-peptide	N	MS	Arg	Ile	Gly	Asn	Leu	Gln	Thr	Asp	auf dem Keller et al., 2010
RIGNLQTD	IGNL	39	34.24			Elongation factor 1-gamma	Q9D8N0	2-437	peptide-Gly140+Leu-peptide	N	MS	Arg	Ile	Leu	Gly	Leu	Leu	Asp	Thr	auf dem Keller et al., 2010
RILGLLDT	ILGL	1198	23.23			thioredoxin-like protein 1	Q8CDN6	2-289	peptide-Tyr262+Phe-peptide	N	MS	Arg	Ile	Ser	Tyr	Phe	Thr	Phe	Ile	Kleifeld et al., 2010
RIRNIIQQ	IRNI	1466	21.53			DNAJ homolog subfamily C member 9	Q8WXX5	155-181	peptide-Asn161+Ile-peptide	N	MS	Arg	Ile	Arg	Asn	Ile	Ile	Gln	Gln	Schilling & Overall, 2008
RISYFTFI	ISYF	4604	10.83			Elongation factor 1-delta	P57776-3	2-660	peptide-Ser465+Leu-peptide	N	MS	Arg	Ile	Thr	Ser	Leu	Glu	Val	Glu	Prudova et al., 2010
RITSLEVE	ITSL	9544	3.04			Spectrin beta chain, brain 1	Q62261	2363-01-01	peptide-Glu1039+Ile-peptide	N	MS	Arg	Leu	Ala	Glu	Ile	Ser	Asp	Val	auf dem Keller et al., 2010
RKEELNAI	KEEL	124701	0			CTP synthase 1	P17812	96-124	peptide-Asp105+Tyr-peptide	N	MS	Arg	Lys	Gly	Asp	Tyr	Leu	Gly	Lys	Schilling & Overall, 2008
RKGDYLGK	KGDY	5656	8.37			Spectrin beta chain, brain 1	Q62261	2363-01-01	peptide-Asn1480+Leu-peptide	N	MS	Arg	Lys	His	Asn	Leu	Leu	Ala	Ser	auf dem Keller et al., 2010
RKHNLLAS	KHNL	57889	0.08			Nucleosome assembly protein 1-like 1	P28656	2-388	peptide-Ala107+Val-peptide	N	MS	Arg	Lys	Tyr	Ala	Val	Leu	Tyr	Gln	auf dem Keller et al., 2010
RKYAVLYQ	KYAV	64301	0.06			U3 small nucleolar ribonucleoprotein protein MPP10	Q810V0	1-681	peptide-Pro416+Val-peptide	N	MS	Arg	Met	Ala	Pro	Val	Ile	Thr	Glu	auf dem Keller et al., 2010
RLAEISDV	LAEI	2523	16.91			CALCB	P10092	82-118	peptide-Gly95+Leu-peptide	P		Arg	Leu	Ala	Gly	Leu	Leu	Ser	Arg	Fernandez-Patron et al., 2000	18591
RLAGLLSR	LAGL	174	32.24			reticulocalbin-2 precursor	Q14257	61-83	peptide-Ala68+Ile-peptide	N	MS	Arg	Leu	Gln	Ala	Ile	Ile	Lys	Lys	Schilling & Overall, 2008
RLENLGIP	LENL	3318	14.36			Transitional endoplasmic reticulum ATPase	Q01853	2-806	peptide-Asp98+Val-peptide	N	MS	Arg	Leu	Gly	Asp	Val	Ile	Ser	Ile	auf dem Keller et al., 2010
RLGDVISI	LGDV	110686	0			CALU protein	Q6IAW5	71-92	peptide-Lys75+Ile-peptide	N	MS	Arg	Leu	Gly	Lys	Ile	Val	Ser	Lys	Schilling & Overall, 2008
RLGKIVSK	LGKI	4636	10.76			U2 small nuclear ribonucleoprotein A'	P57784	2-255	peptide-Gly222+Leu-peptide	N	MS	Arg	Leu	Lys	Gly	Leu	Leu	Gln	Ser	auf dem Keller et al., 2010
RLKGLLQS	LKGL	1823	19.79			Eukaryotic translation initiation factor 6	O55135	1-245	peptide-Ala103+Leu-peptide	N	MS	Arg	Leu	Ser	Ala	Leu	Gly	Asn	Val	auf dem Keller et al., 2010
RLQAIIKK	LQAI	2097	18.61			Fructose-bisphosphate aldolase A	P05064	2-364	peptide-Ser46+Ile-peptide	N	MS	Arg	Leu	Gln	Ser	Ile	Gly	Thr	Glu	auf dem Keller et al., 2010
RLQSIGTE	LQSI	2602	16.66			Protein Dr1	Q91WV0	2-176	peptide-Asn110+Leu-peptide	N	MS	Arg	Leu	Glu	Asn	Leu	Gly	Ile	Pro	auf dem Keller et al., 2010
RLSALGNV	LSAL	112	32.9			Immunoglobulin-binding protein 1	Q61249	2-340	peptide-Ala175+Leu-peptide	N	MS	Arg	Leu	Ser	Ala	Leu	Lys	Ser	Ala	Prudova et al., 2010
RLSALKSA	LSAL	112	32.9			Immunoglobulin-binding protein 1b	Q9QZ29	1-343	peptide-Ser176+Leu-peptide	N	MS	Arg	Leu	Ser	Ser	Leu	Lys	Ser	Ala	auf dem Keller et al., 2010
RLSSLKSA	LSSL	1041	24.28			cDNA FLJ76314, highly similar to Homo sapiens WD repeat domain 1	A8K6E9	466-482	GNVRLYS+ILGTTLKDE	N	MS	Arg	Leu	Tyr	Ser	Ile	Leu	Gly	Thr	Schilling & Overall, 2008
RLYSILGT	LYSI	3230	14.61			WD repeat-containing protein 1 isoform 1 variant	Q53H17	466-482	GNVRLYS+ILGTTLKDE	N	MS	Arg	Leu	Tyr	Ser	Ile	Leu	Gly	Thr	Schilling & Overall, 2008
RMAPVITE	MAPV	8990	3.45			Adenosylhomocysteinase	P50247	2-432	peptide-Glu37+Met-peptide	N	MS	Arg	Met	Arg	Glu	Met	Tyr	Ser	Ala	Prudova et al., 2010
RMREMYSA	MREM	4438	11.25			Pyruvate kinase isozymes M1/M2	P52480	2-531	peptide-Glu282+Ile-peptide	N	MS	Arg	Phe	Asp	Glu	Ile	Leu	Glu	Ala	auf dem Keller et al., 2010
RNSNLVGA	NSNL	3632	13.4			prelamin-A/C	P48678	1-662	peptide-Asn283+Leu-peptide	N	MS	Arg	Asn	Ser	Asn	Leu	Val	Gly	Ala	Kleifeld et al., 2010
RPAEILKE	PAEI	652	27.04			flavin reductase	P30043	39-63	peptide-His49+Val-peptide	N	MS	Arg	Pro	Ala	His	Val	Val	Val	Gly	Schilling & Overall, 2008
RPAHVVVG	PAHV	1681	20.51			basic fibroblast growth factor receptor 1	P11362	22-822	peptide-Val368+Met-peptide	P		Arg	Pro	Ala	Val	Met	Thr	Ser	Pro	Levi et al., 1996	3225
RPAVMTSP	PAVM	2339	17.65			actin, gamma-enteric smooth muscle	P63267	26-58	peptide-His41+Gln-peptide	N	MS	Arg	Pro	Arg	His	Gln	Gly	Val	Met	Schilling & Overall, 2008
RPDNFVFG	PDNF	26013	0.42			tubulin beta-2C chain	P68371	77-103	peptide-Asn89+Phe-peptide	N	MS	Arg	Pro	Asp	Asn	Phe	Val	Phe	Gly	Schilling & Overall, 2008
RPDQLTGL	PDQL	32135	0.28			plectin 2	Q15149-9	3184-3201	CRPDQ+LTGLSLLPLSEK	N	MS	Arg	Pro	Asp	Gln	Leu	Thr	Gly	Leu	Schilling & Overall, 2008
RPEELRED	PEEL	5447	8.78			T-complex protein 1 subunit gamma	P49368	330-353	peptide-Glu337+Leu-peptide	N	MS	Arg	Pro	Glu	Glu	Leu	Arg	Glu	Asp	Schilling & Overall, 2008
RPEQWKEI	PEQW	35787	0.23			T-complex protein 1 subunit gamma isoform 2	P49368-2	292-315	peptide-Glu299+Leu-peptide	N	MS	Arg	Pro	Glu	Glu	Leu	Arg	Glu	Asp	Schilling & Overall, 2008
RPGGKTGS	PGGK	113480	0			serine/threonine-protein phosphatase PP1-beta catalytic subunit	P62140	16-37	peptide-Lys25+Ile-peptide	N	MS	Arg	Pro	Gly	Lys	Ile	Val	Gln	Met	Schilling & Overall, 2008
RPGKIVQM	PGKI	2796	15.92			glutathione synthetase	P48637	306-330	peptide-Met316+Leu-peptide	N	MS	Arg	Pro	Gly	Met	Leu	Glu	Met	Leu	Schilling & Overall, 2008
RPGMLEML	PGML	262	31.03			SPAG9 protein	A6H8U5	198-222	peptide-Ser203+Leu-peptide	N	MS	Arg	Pro	Ile	Ser	Leu	Gly	Ile	Phe	Schilling & Overall, 2008
RPGRLDQL	PGRL	384	29.6			Splicing factor 3A subunit 2	Q62203	1-475	peptide-Gly9+Lys-peptide	N	MS	Arg	Pro	Gly	Gly	Lys	Thr	Gly	Ser	auf dem Keller et al., 2010
RPISLGIF	PISL	282	30.78			translin variant	Q53GR3	153-182	peptide-His169+Ile-peptide	N	MS	Arg	Pro	Leu	His	Ile	Ser	Thr	Phe	Schilling & Overall, 2008
RPKKLEKE	PKKL	5768	8.1			THO complex subunit 4	Q86V81	164-189	peptide-Asn177+Ile-peptide	N	MS	Arg	Pro	Met	Asn	Ile	Gln	Leu	Val	Schilling & Overall, 2008
RPLFLVHP	PLFL	1696	20.41			high mobility group protein HMG-I/HMG-Y	P17095	2-107	peptide-Lys89+Leu-peptide	N	MS	Arg	Pro	Lys	Lys	Leu	Glu	Lys	Glu	Kleifeld et al., 2010
RPLHISTF	PLHI	475	28.65			fatty acid synthase	P49327	2233-2263	peptide-Phe2245+Leu-peptide	N	MS	Arg	Pro	Leu	Phe	Leu	Val	His	Pro	Schilling & Overall, 2008
RPMNIQLV	PMNI	546	28.07			heterogeneous nuclear ribonucleoprotein L	P14866	524-540	LGVKRPSS+VKVFSGKSE	N	MS	Arg	Pro	Ser	Ser	Val	Lys	Val	Phe	Schilling & Overall, 2008
RPNPVQDS	PNPV	19954	0.69			Protein phosphatase 1 regulatory subunit 12A	Q9DBR7	1-1029	peptide-Ser801+Leu-peptide	N	MS	Arg	Pro	Asn	Ser	Leu	Val	Gly	Ile	Prudova et al., 2010
RPNRLIVD	PNRL	3314	14.37			Insulin-like growth factor-binding protein 6	P47880	26-238	peptide-Pro151+Val-peptide	N	MS	Arg	Pro	Asn	Pro	Val	Gln	Asp	Ser	auf dem Keller et al., 2010
RPNSLVGI	PNSL	988	24.63			tubulin beta-4 chain	P04350	77-103	peptide-Asn89+Phe-peptide	N	MS	Arg	Pro	Asp	Asn	Phe	Val	Phe	Gly	Schilling & Overall, 2008
RPQDTVSV	PQDT	148404	0			S-methyl-5'-thioadenosine phosphorylase	Q9CQ65	2-283	peptide-Thr123+Phe-peptide	N	MS	Arg	Pro	Gln	Thr	Phe	Tyr	Asp	Gly	Prudova et al., 2010
RPQNYLFG	PQNY	629	27.25			cytosol alanyl aminopeptidase	P55786	794-821	peptide-Asp808+Thr-peptide	N	MS	Arg	Pro	Gln	Asp	Thr	Val	Ser	Val	Schilling & Overall, 2008
RPQTFYDG	PQTF	5754	8.12			aspartate aminotransferase, mitochondrial precursor	P00505	200-234	peptide-Gln225+Trp-peptide	N	MS	Arg	Pro	Glu	Gln	Trp	Lys	Glu	Ile	Schilling & Overall, 2008
RPRHQGVM	PRHQ	1150	23.57			actin, aortic smooth muscle	P62736	27-59	peptide-His42+Gln-peptide	N	MS	Arg	Pro	Arg	His	Gln	Gly	Val	Met	Schilling & Overall, 2008
RPRPYLPN	PRPY	72	33.44			transitional endoplasmic reticulum ATPase	Q01853	2-806	peptide-Arg25+Leu-peptide	N	MS	Arg	Pro	Asn	Arg	Leu	Ile	Val	Asp	Kleifeld et al., 2010
RPSSVKVF	PSSV	1685	20.49			cDNA, FLJ96627, highly similar to Homo sapiens calpain 1,	B2RDI5	86-104	RPTE+LLSNPQFIVDGATR	N	MS	Arg	Pro	Thr	Glu	Leu	Leu	Ser	Asn	Schilling & Overall, 2008
RPTELLSN	PTEL	2210	18.15			cell proliferation-inducing protein 30	Q2TTR0	86-104	RPTE+LLSNPQFIVDGATR	N	MS	Arg	Pro	Thr	Glu	Leu	Leu	Ser	Asn	Schilling & Overall, 2008
RPTSISWD	PTSI	1881	19.57			Pyruvate kinase isozymes M1/M2	P52480	2-531	peptide-Ala109+Val-peptide	N	MS	Arg	Pro	Val	Ala	Val	Ala	Leu	Asp	Prudova et al., 2010
RPVAVALD	PVAV	597	27.53			Eukaryotic translation initiation factor 3 subunit I	Q9QZD9	1-325	peptide-Asn233+Ser-peptide	N	MS	Arg	Pro	Val	Asn	Ser	Ala	Ala	Leu	auf dem Keller et al., 2010
RPVNSAAL	PVNS	3126	14.88			Insulin-like growth factor-binding protein 4	P47879	22-254	peptide-Pro166+Gln-peptide	N	MS	Arg	Pro	Val	Pro	Gln	Gly	Ser	Cys	Prudova et al., 2010
RPVPQGSC	PVPQ	1017	24.44			non-histone chromosomal protein HMG-17	P09602	1990-02-01	peptide-Arg27+Leu-peptide	N	MS	Arg	Ser	Ala	Arg	Leu	Ser	Ala	Lys	Kleifeld et al., 2010
RQAALQVA	QAAL	874	25.26			Tripeptidyl-peptidase 1	O89023	20-562	peptide-Glu130+Leu-peptide	N	MS	Arg	Gln	Ala	Glu	Leu	Leu	Leu	Pro	auf dem Keller et al., 2010
RQAELLLP	QAEL	7689	4.78			Adenylate kinase 2, mitochondrial	Q9WTP6-1	2-239	peptide-Glu109+Met-peptide	N	MS	Arg	Gln	Ala	Glu	Met	Leu	Asp	Asp	auf dem Keller et al., 2010
RQAEMLDD	QAEM	62562	0.07			Endoplasmin	P08113	22-802	peptide-Ile105+Ser-peptide	N	MS	Arg	Glu	Leu	Ile	Ser	Asn	Ala	Ser	auf dem Keller et al., 2010
RRADLNQG	RADL	2465	17.11			Lamin-A/C	P48678-3	1-462	peptide-Asn171+Leu-peptide	N	MS	Arg	Asn	Ser	Asn	Leu	Val	Gly	Ala	Prudova et al., 2010
RSARLSAK	SARL	7868	4.58			Heterogeneous nuclear ribonucleoproteins A2/B1	O88569	1-353	peptide-Arg203+Gly-peptide	N	MS	Arg	Ser	Gly	Arg	Gly	Gly	Asn	Phe	auf dem Keller et al., 2010
RSGNIVAG	SGNI	13499	1.46			myelin basic protein isoform 2	P04370-2	1-190	peptide-Tyr146+Leu-peptide	P	MS	Arg	Ser	Lys	Tyr	Leu	Ala	Thr	Ala	Shiryaev et al., 2009	25425
RSGRGGNF	SGRG	31834	0.29			GMP synthase [glutamine-hydrolyzing]	P49915	164-185	peptide-Asn172+Ile-peptide	N	MS	Arg	Ser	Gly	Asn	Ile	Val	Ala	Gly	Schilling & Overall, 2008
RSKYLATA	SKYL	7943	4.49			Microtubule-associated protein 1B	P14873	2464-02-01	peptide-Met1832+Leu-peptide	N	MS	Arg	Ser	Ser	Met	Leu	Phe	Asp	Thr	auf dem Keller et al., 2010
RSSMLFDT	SSML	15506	1.12			peptidyl-prolyl cis-trans isomerase NIMA-interacting 1	Q9QUR7	1-165	peptide-Glu147+Met-peptide	N	MS	Arg	Thr	Gly	Glu	Met	Ser	Gly	Pro	Kleifeld et al., 2010
RTGEMSGP	TGEM	109535	0			Phosphoglycerate mutase 1	Q9DBJ1	2-254	peptide-Asp144+Leu-peptide	N	MS	Arg	Tyr	Ala	Asp	Leu	Thr	Glu	Asp	auf dem Keller et al., 2010
RVADISGD	VADI	2589	16.69			matrix metallopeptidase-9	P14780	20-707	peptide-Glu59+Met-peptide	P		Arg	Val	Ala	Glu	Met	Arg	Gly	Glu	Fridman et al., 1995	21334
RVAEMRGE	VAEM	1857	19.66			aspartate aminotransferase, cytoplasmic	P17174	264-285	peptide-Asn270+Leu-peptide	N	MS	Arg	Val	Gly	Asn	Leu	Thr	Val	Val	Schilling & Overall, 2008
RVGKIITV	VGKI	5578	8.52			poly [ADP-ribose] polymerase 1	P09874	589-614	peptide-Thr594+Val-peptide	N	MS	Arg	Val	Gly	Thr	Val	Ile	Gly	Ser	Schilling & Overall, 2008
RVGNLTVV	VGNL	84	33.21			tyrosyl-tRNA synthetase, cytoplasmic	P54577	368-388	DIRVGK+IITVEKHPDADSLY	N	MS	Arg	Val	Gly	Lys	Ile	Ile	Thr	Val	Schilling & Overall, 2008
RVGTVIGS	VGTV	42683	0.16			Vinculin	Q64727	2-1066	peptide-Gln249+Leu-peptide	N	MS	Arg	Val	Leu	Gln	Leu	Thr	Ser	Trp	auf dem Keller et al., 2010
RVKELQAE	VKEL	5475	8.73			Putative uncharacterized protein	Q8BRB8	1-520	peptide-Ala160+Tyr-peptide	N	MS	Arg	Val	Thr	Ala	Tyr	Thr	Val	Asp	auf dem Keller et al., 2010
RVLQLTSW	VLQL	9583	3.01			Vigilin	Q8VDJ3	2-1268	peptide-Glu1040+Leu-peptide	N	MS	Arg	Val	Lys	Glu	Leu	Gln	Ala	Glu	auf dem Keller et al., 2010
RVTAYTVD	VTAY	6071	7.53			L-lactate dehydrogenase B chain	P07195	287-313	peptide-Gly300+Leu-peptide	N	MS	Asn	Ala	Arg	Gly	Leu	Thr	Ser	Val	Schilling & Overall, 2008
RYADLTED	YADL	4132	12.1			V-type proton ATPase subunit B, brain isoform	P62814	1-511	peptide-Glu70+Ile-peptide	N	MS	Arg	Tyr	Ala	Glu	Ile	Val	His	Leu	auf dem Keller et al., 2010
RYAEIVHL	YAEI	6484	6.64			Ser-Gly-Asn-Arg-Tyr-Ser-Ser-Leu-Thr-Ala			Ser-Gly-Asn-Arg-Tyr-Ser-Ser+Leu-Thr-Ala	N		Arg	Tyr	Ser	Ser	Leu	Thr	Ala	-	Murphy, 2004
RYSSLTA-	YSSL	1377	22.08			staphylococcal nuclease domain-containing protein 1	Q7KZF4	493-520	peptide-Asp506+Ile-peptide	N	MS	Arg	Val	Ala	Asp	Ile	Ser	Gly	Asp	Schilling & Overall, 2008
SAADLVTE	AADL	3371	14.18			cDNA, FLJ92657, highly similar to Homo sapiens heterogeneous nuclear ribonucleoprotein C	B2R5W2	99-117	SAAE+MYGSSFDLDYDFQR	N	MS	Ser	Ala	Ala	Glu	Met	Tyr	Gly	Ser	Schilling & Overall, 2008
SAAEMYGS	AAEM	11091	2.17			talin-1	Q9Y490	851-872	peptide-Lys861+Ile-peptide	N	MS	Ser	Ala	Ala	Lys	Ile	Leu	Ala	Asp	Schilling & Overall, 2008
SAAKILAD	AAKI	25574	0.43			U4/U6.U5 tri-snRNP-associated protein 1	Q9Z315	1-806	peptide-Asp253+Leu-peptide	N	MS	Ser	Ala	Arg	Asp	Leu	Gln	Gly	Leu	Prudova et al., 2010
-SAAMLGN	SAAM	1834	19.76			microtubule-associated protein 1B	P46821	1791-1809	SSP+LYSPTFSDSTSAVKE	N	MS	-	Ser	Ser	Pro	Leu	Tyr	Ser	Pro	Schilling & Overall, 2008
SAIGCHVV	AIGC	40325	0.18			fructose-bisphosphate aldolase A	P04075	153-173	IGEHTPSALA+IMENANVLAR	N	MS	Ser	Ala	Leu	Ala	Ile	Met	Glu	Asn	Schilling & Overall, 2008
SAKDIKKI	AKDI	84784	0			poly [ADP-ribose] polymerase 1	P09874	175-190	YSASQ+LKGFSLLATE	N	MS	Ser	Ala	Ser	Gln	Leu	Lys	Gly	Phe	Schilling & Overall, 2008
SALAIMEN	ALAI	3188	14.71			60S acidic ribosomal protein P2	P99027	1-115	peptide-Asp22+Ile-peptide	N	MS	Ser	Ala	Lys	Asp	Ile	Lys	Lys	Ile	auf dem Keller et al., 2010
--SALSGH	-SAL					annexin A2	Q8TBV2	88-104	SA+LSGHLETVILGLLK	N	MS	-	-	Ser	Ala	Leu	Ser	Gly	His	Schilling & Overall, 2008
SAQGVRGY	AQGV	94003	0			Thioredoxin domain-containing protein 5, isoform 2	Q8NBS9-2	18-39	peptide-Gly24+Val-peptide	N	MS	Ser	Ala	Gln	Gly	Val	Arg	Gly	Tyr	Schilling & Overall, 2008
SARDLQGL	ARDL	3084	15.04			thioredoxin domain-containing protein 5 precursor	Q8NBS9	126-147	peptide-Gly132+Val-peptide	N	MS	Ser	Ala	Gln	Gly	Val	Arg	Gly	Tyr	Schilling & Overall, 2008
SASPGLPK	ASPG	78637	0.04			Sulfated glycoprotein 1	Q61207	17-557	peptide-Lys520+Leu-peptide	N	MS	Ser	Ala	Tyr	Lys	Leu	Leu	Leu	Gly	auf dem Keller et al., 2010
SASQLKGF	ASQL	6006	7.67			Protein SET	Q9EQU5	1-289	peptide-Pro31+Gly-peptide	N	MS	Ser	Ala	Ser	Pro	Gly	Leu	Pro	Lys	Prudova et al., 2010
SAVRLRSS	AVRL	8795	3.6			Eukaryotic translation initiation factor 2 subunit 3, X-linked	Q9Z0N1	2-472	peptide-Asp19+Leu-peptide	N	MS	Ser	Arg	Gln	Asp	Leu	Ala	Thr	Leu	auf dem Keller et al., 2010
SAYKLLLG	AYKL	23895	0.49			vimentin	P08670	1995-01-01	peptide-Arg69+Leu-peptide	N	MS	Ser	Ala	Val	Arg	Leu	Arg	Ser	Ser	Schilling & Overall, 2008
SCAALVKA	CAAL	6011	7.66			cathepsin B precursor	P07858	100-120	DQGSCGS+CWAFGAVEAISDR	N	MS	Ser	Cys	Gly	Ser	Cys	Trp	Ala	Phe	Schilling & Overall, 2008
SCGSCWAF	CGSC	154695	0			Endophilin-A2	Q62419	1-368	peptide-Ala313+Leu-peptide	N	MS	Ser	Cys	Lys	Ala	Leu	Tyr	Asp	Phe	auf dem Keller et al., 2010
SCKALYDF	CKAL	22593	0.55			Heat shock cognate 71 kDa protein	P63017	2-646	peptide-Gly19+Val-peptide	N	MS	Ser	Cys	Val	Gly	Val	Phe	Gln	His	auf dem Keller et al., 2010
SCVGVFQH	CVGV	107845	0			heat shock-related 70 kDa protein 2	P54652	2020-11-28	LGT+TYSCVGVFQHGKVE	N	MS	-	Leu	Gly	Thr	Thr	Tyr	Ser	Cys	Schilling & Overall, 2008
SEAKLTGI	EAKL	8376	3.97			Heat shock protein HSP 90-alpha	P07901	2-733	peptide-Glu474+Met-peptide	N	MS	Ser	Gly	Asp	Glu	Met	Val	Ser	Leu	auf dem Keller et al., 2010
--SELTQQ	-SEL					exportin-7	Q9UIA9	304-321	SH+LVDGVKRILENPQSL	N	MS	-	-	Ser	His	Leu	Val	Asp	Gly	Schilling & Overall, 2008
SFNQLFGL	FNQL	98282	0			Kae1 putative peptidase	Q9NPF4	198-217	GMDVSFSG+ILSFIEDVAHR	N	MS	Ser	Phe	Ser	Gly	Ile	Leu	Ser	Phe	Schilling & Overall, 2008
SFRDLIHD	FRDL	32108	0.28			Peroxiredoxin-1	P35700	1-199	peptide-Gly129+Leu-peptide	N	MS	Ser	Phe	Arg	Gly	Leu	Phe	Ile	Ile	auf dem Keller et al., 2010
SFRGLFII	FRGL	6093	7.48			protein phosphatase 1F	P49593	172-191	HVSLPSFNQ+LFGLSDPVNR	N	MS	Ser	Phe	Asn	Gln	Leu	Phe	Gly	Leu	Schilling & Overall, 2008
SFSGILSF	FSGI	10077	2.66			Plasminogen activator inhibitor 1 RNA-binding protein	Q9CY58	2-407	peptide-His206+Tyr-peptide	N	MS	Ser	Phe	Ser	His	Tyr	Ser	Gly	Leu	Prudova et al., 2010
SFSHYSGL	FSHY	5013	9.76			putative uncharacterized protein	Q922F6	1-491	peptide-Lys150+Gly-peptide	N	MS	Ser	Phe	Val	Lys	Gly	Ile	Val	Asp	Kleifeld et al., 2010
SFVKGIVD	FVKG	11666	1.96			polymerase delta interacting protein 46	Q6R954	125-144	SSPAA+FINPPIGTVTPALK	N	MS	Ser	Pro	Ala	Ala	Phe	Ile	Asn	Pro	Schilling & Overall, 2008
SGDEMVSL	GDEM	155529	0			thioredoxin domain-containing protein 12 precursor	O95881	48-63	EAAASGLP+LMVIIHK	N	MS	Ser	Gly	Leu	Pro	Leu	Met	Val	Ile	Schilling & Overall, 2008
SGFSLSGA	GFSL	53720	0.1			Cofilin-1	P18760	2-166	peptide-Ala6+Val-peptide	N	MS	Ser	Gly	Val	Ala	Val	Ser	Asp	Gly	auf dem Keller et al., 2010
SGLPLMVI	GLPL	12224	1.78			Dihydropyrimidinase-related protein 2	O08553	1-572	peptide-Ser540+Leu-peptide	N	MS	Ser	Gly	Phe	Ser	Leu	Ser	Gly	Ala	auf dem Keller et al., 2010
SGVAVSDG	GVAV	37632	0.21			Uncharacterized protein C19orf43 homolog	Q9D735	1-173	peptide-Asn53+Leu-peptide	N	MS	Ser	Gly	Val	Asn	Leu	Phe	Ala	Asn	Prudova et al., 2010
SGVNLFAN	GVNL	11928	1.87			Translationally-controlled tumor protein	P63028	1-172	peptide-Glu12+Leu-peptide	N	MS	Ser	His	Asp	Glu	Leu	Phe	Ser	Asp	auf dem Keller et al., 2010
SHDELFSD	HDEL	144817	0			pre-mRNA-processing factor 19	Q9UMS4	203-228	peptide-Gly215+Leu-peptide	N	MS	Ser	His	Val	Gly	Leu	His	Ser	Ala	Schilling & Overall, 2008
--SHLVDG	-SHL					serine/threonine-protein phosphatase 2A 65 kDa regulatory subunit A alpha isoform	P30153	352-368	SP+ILGKDNTIEHLLPL	N	MS	-	-	Ser	Pro	Ile	Leu	Gly	Lys	Schilling & Overall, 2008
SHVGLHSA	HVGL	23844	0.49			T-complex protein 1 subunit alpha	P17987	15-42	peptide-Asn30+Ile-peptide	N	MS	Ser	Ile	Ala	Asn	Ile	Val	Lys	Ser	Schilling & Overall, 2008
SIANIVKS	IANI	474	28.68			fructose-bisphosphate aldolase C	P09972	173-200	peptide-Gln179+Gln-peptide	N	MS	Ser	Ile	Cys	Gln	Gln	Asn	Gly	Ile	Schilling & Overall, 2008
SICQQNGI	ICQQ	142009	0			fructose-bisphosphate aldolase A	P04075	173-200	peptide-Gln179+Gln-peptide	N	MS	Ser	Ile	Cys	Gln	Gln	Asn	Gly	Ile	Schilling & Overall, 2008
SIGKIGGA	IGKI	4391	11.43			uncharacterized protein CCT6A	P40227-2	129-147	SILA+IKKQDEPIDLFMIE	N	MS	Ser	Ile	Leu	Ala	Ile	Lys	Lys	Gln	Schilling & Overall, 2008
[truncated: 524 more rows]

## Sheet: C.MMP9 physiologic subst MEROPS
S17 Table. (C) Tetramer annotation of MMP-9 cleavage sites in physiologic substrates collected in MEROPS database
MEROPS octamers	tetramer sequence	Relative probability (RP) rank	relative probability (RP)	MMP9 substrates. Merops annotation:	Substrate	Uniprot	Residue range	Cleavage Site	Cleavage type	Evidence	P4	P3	P2	P1	P1'	P2'	P3'	P4'	Reference	CutDB
RAKRFASL	AKRF	27471	0.43		A disintegrin and metalloproteinase with thrombospondin motifs 4 precursor	O75173	1-837	peptide-Arg212+Phe-peptide	P	NT	Arg	Ala	Lys	Arg	Phe	Ala	Ser	Leu	Tortorella et al., 2005
IPENFFGV	PENF	2324	20.05		aggrecan core protein	P16112	17-2415	peptide-Asn360+Phe-peptide	P		Ile	Pro	Glu	Asn	Phe	Phe	Gly	Val	Fosang et al., 1992	18100
IPENFFGV	PENF	2324	20.05		Aggrecan core protein	Q29011	1-537	peptide-Asn344+Phe-peptide	P	NT	Ile	Pro	Glu	Asn	Phe	Phe	Gly	Val	Fosang et al., 1993	18070
PFFPFHSP	FFPF	31938	0.33		alpha crystallin B chain	P02511	1-175	peptide-Pro16+Phe-peptide	P		Pro	Phe	Phe	Pro	Phe	His	Ser	Pro	Starckx et al., 2003	18274
SPSRLFDQ	PSRL	593	39.82		alpha crystallin B chain	P02511	1-175	peptide-Arg22+Leu-peptide	P		Ser	Pro	Ser	Arg	Leu	Phe	Asp	Gln	Starckx et al., 2003	18276
SPFYLRPP	PFYL	477	41.6		alpha crystallin B chain	P02511	1-175	peptide-Tyr48+Leu-peptide	P		Ser	Pro	Phe	Tyr	Leu	Arg	Pro	Pro	Starckx et al., 2003	18278
APSWFDTG	PSWF	1284	30.39		alpha crystallin B chain	P02511	1-175	peptide-Trp60+Phe-peptide	P		Ala	Pro	Ser	Trp	Phe	Asp	Thr	Gly	Starckx et al., 2003	18279
SPEELKVK	PEEL	2351	19.86		alpha crystallin B chain	P02511	1-175	peptide-Glu88+Leu-peptide	P		Ser	Pro	Glu	Glu	Leu	Lys	Val	Lys	Starckx et al., 2003	18280
DPLTITSS	PLTI	640	39.01		alpha crystallin B chain	P02511	1-175	peptide-Thr132+Ile-peptide	P		Asp	Pro	Leu	Thr	Ile	Thr	Ser	Ser	Starckx et al., 2003	18281
GPRKQVSG	PRKQ	2914	15.87		alpha crystallin B chain	P02511	1-175	peptide-Lys150+Gln-peptide	P		Gly	Pro	Arg	Lys	Gln	Val	Ser	Gly	Starckx et al., 2003	18282
DEHGFISR	EHGF	144713	0		alpha crystallin B chain	P02511	1-175	peptide-Gly112+Phe-peptide	P		Asp	Glu	His	Gly	Phe	Ile	Ser	Arg	Starckx et al., 2003
---MDIAI					alpha crystallin B chain	P02511	1-175	Met1+Asp-peptide	P		-	-	-	Met	Asp	Ile	Ala	Ile	Starckx et al., 2003
--MDIAIH					alpha crystallin B chain	P02511	1-175	peptide-Asp2+Ile-peptide	P		-	-	Met	Asp	Ile	Ala	Ile	His	Starckx et al., 2003
MDIAIHHP	DIAI	63936	0.07		alpha crystallin B chain	P02511	1-175	peptide-Ala4+Ile-peptide	P		Met	Asp	Ile	Ala	Ile	His	His	Pro	Starckx et al., 2003
RLFDQFFG	LFDQ	159190	0		alpha crystallin B chain	P02511	1-175	peptide-Asp25+Gln-peptide	P		Arg	Leu	Phe	Asp	Gln	Phe	Phe	Gly	Starckx et al., 2003
FFGEHLLE	FGEH	147356	0		alpha crystallin B chain	P02511	1-175	peptide-Glu30+His-peptide	P		Phe	Phe	Gly	Glu	His	Leu	Leu	Glu	Starckx et al., 2003
GEHLLESD	EHLL	74782	0.05		alpha crystallin B chain	P02511	1-175	peptide-Leu32+Leu-peptide	P		Gly	Glu	His	Leu	Leu	Glu	Ser	Asp	Starckx et al., 2003
LLESDLFP	LESD	114459	0		alpha crystallin B chain	P02511	1-175	peptide-Ser35+Asp-peptide	P		Leu	Leu	Glu	Ser	Asp	Leu	Phe	Pro	Starckx et al., 2003
LFPTSTSL	FPTS	25908	0.47		alpha crystallin B chain	P02511	1-175	peptide-Thr40+Ser-peptide	P		Leu	Phe	Pro	Thr	Ser	Thr	Ser	Leu	Starckx et al., 2003
PTSTSLSP	TSTS	20271	0.68		alpha crystallin B chain	P02511	1-175	peptide-Thr42+Ser-peptide	P		Pro	Thr	Ser	Thr	Ser	Leu	Ser	Pro	Starckx et al., 2003
LSPFYLRP	SPFY	8241	2.7		alpha crystallin B chain	P02511	1-175	peptide-Phe47+Tyr-peptide	P		Leu	Ser	Pro	Phe	Tyr	Leu	Arg	Pro	Starckx et al., 2003
GLSEMRLE	LSEM	56111	0.11		alpha crystallin B chain	P02511	1-175	peptide-Glu67+Met-peptide	P		Gly	Leu	Ser	Glu	Met	Arg	Leu	Glu	Starckx et al., 2003
SEMRLEKD	EMRL	3734	11.56		alpha crystallin B chain	P02511	1-175	peptide-Arg69+Leu-peptide	P		Ser	Glu	Met	Arg	Leu	Glu	Lys	Asp	Starckx et al., 2003
DVIEVHGK	VIEV	132144	0		alpha crystallin B chain	P02511	1-175	peptide-Glu99+Val-peptide	P		Asp	Val	Ile	Glu	Val	His	Gly	Lys	Starckx et al., 2003
VIEVHGKH	IEVH	66248	0.07		alpha crystallin B chain	P02511	1-175	peptide-Val100+His-peptide	P		Val	Ile	Glu	Val	His	Gly	Lys	His	Starckx et al., 2003
EVHGKHEE	VHGK	101302	0		alpha crystallin B chain	P02511	1-175	peptide-Gly102+Lys-peptide	P		Glu	Val	His	Gly	Lys	His	Glu	Glu	Starckx et al., 2003
FHRKYRIP	HRKY	117123	0		alpha crystallin B chain	P02511	1-175	peptide-Lys121+Tyr-peptide	P		Phe	His	Arg	Lys	Tyr	Arg	Ile	Pro	Starckx et al., 2003
HRKYRIPA	RKYR	148098	0		alpha crystallin B chain	P02511	1-175	peptide-Tyr122+Arg-peptide	P		His	Arg	Lys	Tyr	Arg	Ile	Pro	Ala	Starckx et al., 2003
ITSSLSSD	TSSL	12003	1.47		alpha crystallin B chain	P02511	1-175	peptide-Ser136+Leu-peptide	P		Ile	Thr	Ser	Ser	Leu	Ser	Ser	Asp	Starckx et al., 2003
RTIPITRE	TIPI	23752	0.54		alpha crystallin B chain	P02511	1-175	peptide-Pro160+Ile-peptide	P		Arg	Thr	Ile	Pro	Ile	Thr	Arg	Glu	Starckx et al., 2003
KPAVTAAP	PAVT	79356	0		alpha crystallin B chain	P02511	1-175	peptide-Val169+Thr-peptide	P		Lys	Pro	Ala	Val	Thr	Ala	Ala	Pro	Starckx et al., 2003
FSVNLDVK	SVNL	6628	4		alpha crystallin B chain	P02511	1-175	peptide-Asn78+Leu-peptide	P		Phe	Ser	Val	Asn	Leu	Asp	Val	Lys	Starckx et al., 2003
PPSFLRAP	PSFL	770	37.03		alpha crystallin B chain	P02511	1-175	peptide-Phe54+Leu-peptide	P		Pro	Pro	Ser	Phe	Leu	Arg	Ala	Pro	Starckx et al., 2003	18277
GAMFLEAI	AMFL	3050	15.12		alpha-1-peptidase inhibitor	P01009	25-418	peptide-Phe376+Leu-peptide	P		Gly	Ala	Met	Phe	Leu	Glu	Ala	Ile	Nelson et al., 1998	19090
EAIPMSIP	AIPM	1702	25.73		alpha-1-peptidase inhibitor	P01009	25-418	peptide-Pro381+Met-peptide	P		Glu	Ala	Ile	Pro	Met	Ser	Ile	Pro	Nelson et al., 1998	19109
GPEGLRVG	PEGL	616	39.41		alpha-2-macroglobulin	P01023	24-1474	peptide-Gly702+Leu-peptide	P		Gly	Pro	Glu	Gly	Leu	Arg	Val	Gly	Arbelez et al., 1997
VKKDQLGK	KKDQ	134195	0		alpha-synuclein	P37840	1-140	peptide-Asp98+Gln-peptide	P		Val	Lys	Lys	Asp	Gln	Leu	Gly	Lys	Levin etal, 2008
TAVAQKTV	AVAQ	4533	8.41		alpha-synuclein	P37840	1-140	peptide-Ala78+Gln-peptide	P		Thr	Ala	Val	Ala	Gln	Lys	Thr	Val	Levin etal, 2008
VTNVGGAV	TNVG	76015	0.05		alpha-synuclein	P37840	1-140	peptide-Val66+Gly-peptide	P		Val	Thr	Asn	Val	Gly	Gly	Ala	Val	Levin etal, 2008
GGAVVTGV	GAVV	56413	0.11		alpha-synuclein	P37840	1-140	peptide-Val70+Val-peptide	P		Gly	Gly	Ala	Val	Val	Thr	Gly	Val	Levin etal, 2008
VVTGVTAV	VTGV	82594	0		alpha-synuclein	P37840	1-140	peptide-Gly73+Val-peptide	P		Val	Val	Thr	Gly	Val	Thr	Ala	Val	Levin etal, 2008
VTGVTAVA	TGVT	58063	0.1		alpha-synuclein	P37840	1-140	peptide-Val74+Thr-peptide	P		Val	Thr	Gly	Val	Thr	Ala	Val	Ala	Levin etal, 2008
GAVVTGVT	AVVT	55563	0.11		alpha-synuclein	P37840	1-140	peptide-Val71+Thr-peptide	P		Gly	Ala	Val	Val	Thr	Gly	Val	Thr	Levin etal, 2008
VVAAAEKT	VAAA	12336	1.42		alpha-synuclein	P37840	1-140	peptide-Ala18+Ala-peptide	P		Val	Val	Ala	Ala	Ala	Glu	Lys	Thr	Levin etal, 2008
FMKGLSKA	MKGL	6787	3.82		alpha-synuclein	P37840	1-140	peptide-Gly7+Leu-peptide	P		Phe	Met	Lys	Gly	Leu	Ser	Lys	Ala	Levin etal, 2008
MDVFMKGL	DVFM	108107	0		alpha-synuclein	P37840	1-140	peptide-Phe4+Met-peptide	P		Met	Asp	Val	Phe	Met	Lys	Gly	Leu	Levin etal, 2008
HHQKLVFF	HQKL	70305	0.06		beta-amyloid protein 42	P05067	672-713	peptide-Lys687+Leu-peptide	P		His	His	Gln	Lys	Leu	Val	Phe	Phe	Yan et al., 2006	18625
LVFFAEDV	VFFA	83000	0		beta-amyloid protein 42	P05067	672-713	peptide-Phe691+Ala-peptide	P		Leu	Val	Phe	Phe	Ala	Glu	Asp	Val	Yan et al., 2006	18632
NKGAIIGL	KGAI	32667	0.32		beta-amyloid protein 42	P05067	672-713	peptide-Ala701+Ile-peptide	P		Asn	Lys	Gly	Ala	Ile	Ile	Gly	Leu	Yan et al., 2006	18634
AIIGLMVG	IIGL	15777	0.98		beta-amyloid protein 42	P05067	672-713	peptide-Gly704+Leu-peptide	P		Ala	Ile	Ile	Gly	Leu	Met	Val	Gly	Yan et al., 2006	18636
IIGLMVGG	IGLM	7888	2.91		beta-amyloid protein 42	P05067	672-713	peptide-Leu705+Met-peptide	P		Ile	Ile	Gly	Leu	Met	Val	Gly	Gly	Yan et al., 2006	18638
FAEDVGSN	AEDV	156836	0		beta-amyloid protein 42	P05067	672-713	peptide-Asp694+Val-peptide	P		Phe	Ala	Glu	Asp	Val	Gly	Ser	Asn	Yan et al., 2006
VPYGLGSP	PYGL	30	49.41		big endothelin 1	P05305	53-90	peptide-Gly84+Leu-peptide	P		Val	Pro	Tyr	Gly	Leu	Gly	Ser	Pro	Fernandez-Patron et al., 1999	18589
NPLENSGF	PLEN	12259	1.43		biglycan	P21810	38-368	peptide-Glu196+Asn-peptide	P	MS	Asn	Pro	Leu	Glu	Asn	Ser	Gly	Phe	Zhen et al., 2008	22372
SEAKLTGI	EAKL	90359	0		biglycan	P21810	38-368	peptide-Lys219+Leu-peptide	P	MS	Ser	Glu	Ala	Lys	Leu	Thr	Gly	Ile	Zhen et al., 2008	22373
SDLGLKSV	DLGL	57129	0.11		biglycan	P21810	38-368	peptide-Gly84+Leu-peptide	P	MS	Ser	Asp	Leu	Gly	Leu	Lys	Ser	Val	Zhen et al., 2008	22374
DISELRKD	ISEL	15465	1.01		biglycan	P21810	38-368	peptide-Glu104+Leu-peptide	P	MS	Asp	Ile	Ser	Glu	Leu	Arg	Lys	Asp	Zhen et al., 2008	22375
LKAVSKER	KAVS	15958	0.97		C-X-C motif chemokine 10	P02778	22-98	peptide-Val89+Ser-peptide	P		Leu	Lys	Ala	Val	Ser	Lys	Glu	Arg	Van den Steen et al., 2003	18609
FPMFKRGR	PMFK	39453	0.23		C-X-C motif chemokine 11	O14625	22-94	peptide-Phe25+Lys-peptide	P		Phe	Pro	Met	Phe	Lys	Arg	Gly	Arg	Cox et al., 2008
NPKSKQAR	PKSK	36899	0.26		C-X-C motif chemokine 11	O14625	22-94	peptide-Ser79+Lys-peptide	P		Asn	Pro	Lys	Ser	Lys	Gln	Ala	Arg	Cox et al., 2008
GPQCSKVE	PQCS	108323	0		C-X-C motif chemokine 5	P42830	37-114	peptide-Cys75+Ser-peptide	P		Gly	Pro	Gln	Cys	Ser	Lys	Val	Glu	Van den Steen et al., 2003	18600
VVASLKNG	VASL	2493	18.64		C-X-C motif chemokine 5	P42830	37-114	peptide-Ser83+Leu-peptide	P		Val	Val	Ala	Ser	Leu	Lys	Asn	Gly	Van den Steen et al., 2003	18601
VLRELRCV	LREL	2168	21.21		C-X-C motif chemokine 5	P42830	37-114	peptide-Glu46+Leu-peptide	P		Val	Leu	Arg	Glu	Leu	Arg	Cys	Val	Van den Steen et al., 2003	3244
MISNLQVF	ISNL	2355	19.8		C-X-C motif chemokine 5	P42830	37-114	peptide-Asn65+Leu-peptide	P		Met	Ile	Ser	Asn	Leu	Gln	Val	Phe	Van den Steen et al., 2003	18599
PAAAVLRE	AAAV	36188	0.27		C-X-C motif chemokine 5	P42830	37-114	peptide-Ala42+Val-peptide	P		Pro	Ala	Ala	Ala	Val	Leu	Arg	Glu	Van den Steen et al., 2003	18597
GPAAAVLR	PAAA	6248	4.5		C-X-C motif chemokine 5	P42830	37-114	peptide-Ala41+Ala-peptide	P		Gly	Pro	Ala	Ala	Ala	Val	Leu	Arg	Van den Steen et al., 2003	18596
AAAVLREL	AAVL	22587	0.58		C-X-C motif chemokine 5	P42830	37-114	peptide-Val43+Leu-peptide	P		Ala	Ala	Ala	Val	Leu	Arg	Glu	Leu	Van den Steen et al., 2003	18598
KVLKVRKS	VLKV	96619	0		C-X-C motif chemokine 9	Q07325	23-125	peptide-Lys112+Val-peptide	P		Lys	Val	Leu	Lys	Val	Arg	Lys	Ser	Van den Steen et al., 2003	18611
KVRKSQRS	VRKS	113055	0		C-X-C motif chemokine 9	Q07325	23-125	peptide-Lys115+Ser-peptide	P		Lys	Val	Arg	Lys	Ser	Gln	Arg	Ser	Van den Steen et al., 2003	18612
VRKSQRSR	RKSQ	104482	0		C-X-C motif chemokine 9	Q07325	23-125	peptide-Ser116+Gln-peptide	P		Val	Arg	Lys	Ser	Gln	Arg	Ser	Arg	Van den Steen et al., 2003	18613
VPYAYQGN	PYAY	24	49.62		Chitinase-3-like protein 3	O35744	22-398	peptide-Ala327+Ala-peptide	P	NT	Val	Pro	Tyr	Ala	Tyr	Gln	Gly	Asn	Greenlee et al., 2006
LGSSYQLM	GSSY	29762	0.37		Chitinase-3-like protein 3	O35744	1-398	peptide-Ser21+Tyr-peptide	P	NT	Leu	Gly	Ser	Ser	Tyr	Gln	Leu	Met	Greenlee et al., 2006
GPGGVVGP	PGGV	3960	10.6		collagen alpha 1(XI) chain	P12107	512-1563	peptide-Gly439+Val-peptide	P		Gly	Pro	Gly	Gly	Val	Val	Gly	Pro	Niyibizi et al., 1994	18227
GPSGFQGL	PSGF	808	36.65		collagen alpha-1(II) chain	P02458	182-1241	peptide-Gly663+Phe-peptide	P		Gly	Pro	Ser	Gly	Phe	Gln	Gly	Leu	Van den Steen et al., 2004	18496
GPRGERGF	PRGE	17807	0.82		collagen alpha-1(II) chain	P02458	182-1241	peptide-Gly699+Glu-peptide	P		Gly	Pro	Arg	Gly	Glu	Arg	Gly	Phe	Van den Steen et al., 2004	18497
GARGLTGR	ARGL	725	37.71		collagen alpha-1(II) chain	P02458	182-1241	peptide-Gly561+Leu-peptide	P		Gly	Ala	Arg	Gly	Leu	Thr	Gly	Arg	Van den Steen et al., 2004	18493
GPSGLAGP	PSGL	128	47.39		collagen alpha-1(II) chain	P02458	182-1241	peptide-Gly537+Leu-peptide	P		Gly	Pro	Ser	Gly	Leu	Ala	Gly	Pro	Van den Steen et al., 2004	18533
GAPGLRGL	APGL	6833	3.78		collagen alpha-1(II) chain	P02458	182-1241	peptide-Gly627+Leu-peptide	P		Gly	Ala	Pro	Gly	Leu	Arg	Gly	Leu	Van den Steen et al., 2004	18495
GPKGANGD	PKGA	13672	1.22		collagen alpha-1(II) chain	P02458	182-1241	peptide-Gly543+Ala-peptide	P		Gly	Pro	Lys	Gly	Ala	Asn	Gly	Asp	Van den Steen et al., 2004	18492
GPPGERGA	PPGE	56028	0.11		collagen alpha-1(II) chain	P02458	182-1241	peptide-Gly507+Glu-peptide	P		Gly	Pro	Pro	Gly	Glu	Arg	Gly	Ala	Van den Steen et al., 2004	18490
QLGVMQGP	LGVM	10648	1.79		collagen alpha-1(II) chain	P02458	182-1241	peptide-Val198+Met-peptide	P		Gln	Leu	Gly	Val	Met	Gln	Gly	Pro	Fukui et al., 2002	18182
LGVMQGPM	GVMQ	91467	0		collagen alpha-1(II) chain	P02458	182-1241	peptide-Met199+Gln-peptide	P		Leu	Gly	Val	Met	Gln	Gly	Pro	Met	Fukui et al., 2002	18183
GPQGARGQ	PQGA	70545	0.06		collagen alpha-1(II) chain	P02458	182-1241	peptide-Gly594+Ala-peptide	P		Gly	Pro	Gln	Gly	Ala	Arg	Gly	Gln	Van den Steen et al., 2004	18494
GPQGARGF	PQGA	70545	0.06		collagen alpha-1(II) chain	P02458	182-1241	peptide-Gly273+Ala-peptide	P		Gly	Pro	Gln	Gly	Ala	Arg	Gly	Phe	Van den Steen et al., 2004	18512
GPQGFQGN	PQGF	764	37.1		collagen alpha-1(II) chain	P02458	182-1241	peptide-Gly222+Phe-peptide	P		Gly	Pro	Gln	Gly	Phe	Gln	Gly	Asn	Van den Steen et al., 2004	18513
GPRGLPGE	PRGL	129	47.38		collagen alpha-1(II) chain	P02458	182-1241	peptide-Gly327+Leu-peptide	P		Gly	Pro	Arg	Gly	Leu	Pro	Gly	Glu	Van den Steen et al., 2004	18514
GPAGAAGA	PAGA	36370	0.27		collagen alpha-1(II) chain	P02458	182-1241	peptide-Gly339+Ala-peptide	P		Gly	Pro	Ala	Gly	Ala	Ala	Gly	Ala	Van den Steen et al., 2004	18515
GAAGARGN	AAGA	75248	0.05		collagen alpha-1(II) chain	P02458	182-1241	peptide-Gly342+Ala-peptide	P		Gly	Ala	Ala	Gly	Ala	Arg	Gly	Asn	Van den Steen et al., 2004	18516
GPEGAQGP	PEGA	127878	0		collagen alpha-1(II) chain	P02458	182-1241	peptide-Gly387+Ala-peptide	P		Gly	Pro	Glu	Gly	Ala	Gln	Gly	Pro	Van den Steen et al., 2004	18519
GPAGASGN	PAGA	36370	0.27		collagen alpha-1(II) chain	P02458	182-1241	peptide-Gly405+Ala-peptide	P		Gly	Pro	Ala	Gly	Ala	Ser	Gly	Asn	Van den Steen et al., 2004	18520
GPKGQTGE	PKGQ	865	35.93		collagen alpha-1(II) chain	P02458	182-1241	peptide-Gly453+Gln-peptide	P		Gly	Pro	Lys	Gly	Gln	Thr	Gly	Glu	Van den Steen et al., 2004	18521
GPAGEEGK	PAGE	68173	0.06		collagen alpha-1(II) chain	P02458	182-1241	peptide-Gly486+Glu-peptide	P		Gly	Pro	Ala	Gly	Glu	Glu	Gly	Lys	Van den Steen et al., 2004	18522
GAQGLQGP	AQGL	1536	27.57		collagen alpha-1(II) chain	P02458	182-1241	peptide-Gly714+Leu-peptide	P		Gly	Ala	Gln	Gly	Leu	Gln	Gly	Pro	Van den Steen et al., 2004	18540
GPRGLPGT	PRGL	129	47.38		collagen alpha-1(II) chain	P02458	182-1241	peptide-Gly720+Leu-peptide	P		Gly	Pro	Arg	Gly	Leu	Pro	Gly	Thr	Van den Steen et al., 2004	18541
GPPGLQGM	PPGL	981	34.4		collagen alpha-1(II) chain	P02458	182-1241	peptide-Gly747+Leu-peptide	P		Gly	Pro	Pro	Gly	Leu	Gln	Gly	Met	Van den Steen et al., 2004	18542
GPAGANGE	PAGA	36370	0.27		collagen alpha-1(II) chain	P02458	182-1241	peptide-Gly798+Ala-peptide	P		Gly	Pro	Ala	Gly	Ala	Asn	Gly	Glu	Van den Steen et al., 2004	18543
GPAGFAGP	PAGF	1008	34.02		collagen alpha-1(II) chain	P02458	182-1241	peptide-Gly834+Phe-peptide	P		Gly	Pro	Ala	Gly	Phe	Ala	Gly	Pro	Van den Steen et al., 2004	18544
GPTGVTGP	PTGV	3835	11.14		collagen alpha-1(II) chain	P02458	182-1241	peptide-Gly879+Val-peptide	P		Gly	Pro	Thr	Gly	Val	Thr	Gly	Pro	Van den Steen et al., 2004	18545
GPPGATGF	PPGA	63679	0.07		collagen alpha-1(II) chain	P02458	182-1241	peptide-Gly894+Ala-peptide	P		Gly	Pro	Pro	Gly	Ala	Thr	Gly	Phe	Van den Steen et al., 2004	18546
GPKGARGD	PKGA	13672	1.22		collagen alpha-1(II) chain	P02458	182-1241	peptide-Gly930+Ala-peptide	P		Gly	Pro	Lys	Gly	Ala	Arg	Gly	Asp	Van den Steen et al., 2004	18547
GPQGLAGQ	PQGL	98	47.86		collagen alpha-1(II) chain	P02458	182-1241	peptide-Gly975+Leu-peptide	P		Gly	Pro	Gln	Gly	Leu	Ala	Gly	Gln	Van den Steen et al., 2004	18548
GPPGLTGP	PPGL	981	34.4		collagen alpha-1(II) chain	P02458	182-1241	peptide-Gly1026+Leu-peptide	P		Gly	Pro	Pro	Gly	Leu	Thr	Gly	Pro	Van den Steen et al., 2004	18550
GARGIQGP	ARGI	1214	31.4		collagen alpha-1(II) chain	P02458	182-1241	peptide-Gly1107+Ile-peptide	P		Gly	Ala	Arg	Gly	Ile	Gln	Gly	Pro	Van den Steen et al., 2004	18551
GHRGFTGL	HRGF	66085	0.07		collagen alpha-1(II) chain	P02458	182-1241	peptide-Gly1134+Phe-peptide	P		Gly	His	Arg	Gly	Phe	Thr	Gly	Leu	Van den Steen et al., 2004	18552
GPPGPAGF	PPGP	91407	0		collagen alpha-1(II) chain	P02458	182-1241	peptide-Gly831+Pro-peptide	P		Gly	Pro	Pro	Gly	Pro	Ala	Gly	Phe	Van den Steen et al., 2004
GPSGDQGA	PSGD	25602	0.48		collagen alpha-1(II) chain	P02458	182-1241	peptide-Gly1149+Asp-peptide	P	MS	Gly	Pro	Ser	Gly	Asp	Gln	Gly	Ala	Zhen et al., 2008	22834
GPSGKDGA	PSGK	14787	1.08		collagen alpha-1(II) chain	P02458	182-1241	peptide-Gly1173+Lys-peptide	P	MS	Gly	Pro	Ser	Gly	Lys	Asp	Gly	Ala	Zhen et al., 2008	22836
GPPGSNGN	PPGS	42013	0.2		collagen alpha-1(II) chain	P02458	182-1241	peptide-Gly909+Ser-peptide	P	MS	Gly	Pro	Pro	Gly	Ser	Asn	Gly	Asn	Zhen et al., 2008	22902
GAAGVKGD	AAGV	75426	0.05		collagen alpha-1(II) chain	P02458	182-1241	peptide-Gly1053+Val-peptide	P	MS	Gly	Ala	Ala	Gly	Val	Lys	Gly	Asp	Zhen et al., 2008	22924
GPTGKQGD	PTGK	95269	0		collagen alpha-1(II) chain	P02458	182-1241	peptide-Gly1083+Lys-peptide	P	MS	Gly	Pro	Thr	Gly	Lys	Gln	Gly	Asp	Zhen et al., 2008	22928
GAPGNRGF	APGN	8890	2.38		collagen alpha-1(II) chain	P02458	182-1241	peptide-Gly513+Asn-peptide	P	MS	Gly	Ala	Pro	Gly	Asn	Arg	Gly	Phe	Zhen et al., 2008	22952
GLRGLPGK	LRGL	1441	28.75		collagen alpha-1(II) chain	P02458	182-1241	peptide-Gly630+Leu-peptide	P	MS	Gly	Leu	Arg	Gly	Leu	Pro	Gly	Lys	Zhen et al., 2008	23031
GPAGERGE	PAGE	68173	0.06		collagen alpha-1(II) chain	P02458	182-1241	peptide-Gly651+Glu-peptide	P	MS	Gly	Pro	Ala	Gly	Glu	Arg	Gly	Glu	Zhen et al., 2008	23035
GAPGFPGP	APGF	23253	0.56		collagen alpha-1(II) chain	P02458	182-1241	peptide-Gly432+Phe-peptide	P	MS	Gly	Ala	Pro	Gly	Phe	Pro	Gly	Pro	Zhen et al., 2008	23063
LGPKGQTG	GPKG	8069	2.81		collagen alpha-1(II) chain	P02458	182-1241	peptide-Lys452+Gly-peptide	P	MS	Leu	Gly	Pro	Lys	Gly	Gln	Thr	Gly	Zhen et al., 2008	23066
GQRGIVGL	QRGI	19198	0.74		Collagen alpha-1(II) chain isoform 2	P02458	182-1241	peptide-Gly981+Ile-peptide	P		Gly	Gln	Arg	Gly	Ile	Val	Gly	Leu	Van den Steen et al., 2004	18549
NFAAQMAG	FAAQ	40848	0.22		collagen alpha-1(II) chain precursor	P02458	26-1487	peptide-Ala181+Gln-peptide	P		Asn	Phe	Ala	Ala	Gln	Met	Ala	Gly	Fukui et al., 2002	18176
FAAQMAGG	AAQM	11717	1.53		collagen alpha-1(II) chain precursor	P02458	26-1487	peptide-Gln182+Met-peptide	P		Phe	Ala	Ala	Gln	Met	Ala	Gly	Gly	Fukui et al., 2002	18178
QQGAIGSP	QGAI	99364	0		collagen alpha-1(III) chain	P02461	154-1221	peptide-Ala1129+Ile-peptide	P	MS	Gln	Gln	Gly	Ala	Ile	Gly	Ser	Pro	Zhen et al., 2008	22868
GPPGKDGT	PPGK	89753	0		collagen alpha-1(III) chain	P02461	154-1221	peptide-Gly1149+Lys-peptide	P	MS	Gly	Pro	Pro	Gly	Lys	Asp	Gly	Thr	Zhen et al., 2008	22869
QGPKGDPG	GPKG	8069	2.81		collagen alpha-1(III) chain	P02461	154-1221	peptide-Lys108+Gly-peptide	P	MS	Gln	Gly	Pro	Lys	Gly	Asp	Pro	Gly	Zhen et al., 2008	22870
GQPGSPGS	QPGS	23167	0.56		collagen alpha-1(III) chain	P02461	154-1221	peptide-Gly130+Ser-peptide	P	MS	Gly	Gln	Pro	Gly	Ser	Pro	Gly	Ser	Zhen et al., 2008	22871
GSPGYQGP	SPGY	19596	0.72		collagen alpha-1(III) chain	P02461	154-1221	peptide-Gly198+Tyr-peptide	P	MS	Gly	Ser	Pro	Gly	Tyr	Gln	Gly	Pro	Zhen et al., 2008	22872
GPPGAIGP	PPGA	63679	0.07		collagen alpha-1(III) chain	P02461	154-1221	peptide-Gly219+Ala-peptide	P	MS	Gly	Pro	Pro	Gly	Ala	Ile	Gly	Pro	Zhen et al., 2008	22873
GPPGVAGP	PPGV	49591	0.15		collagen alpha-1(III) chain	P02461	154-1221	peptide-Gly840+Val-peptide	P	MS	Gly	Pro	Pro	Gly	Val	Ala	Gly	Pro	Zhen et al., 2008	22874
GPQGVKGE	PQGV	980	34.41		collagen alpha-1(III) chain	P02461	154-1221	peptide-Gly858+Val-peptide	P	MS	Gly	Pro	Gln	Gly	Val	Lys	Gly	Glu	Zhen et al., 2008	22875
GPAGQQGA	PAGQ	1446	28.67		collagen alpha-1(III) chain	P02461	154-1221	peptide-Gly1125+Gln-peptide	P	MS	Gly	Pro	Ala	Gly	Gln	Gln	Gly	Ala	Zhen et al., 2008	22876
GAPGLRGG	APGL	6833	3.78		collagen alpha-1(III) chain	P02461	154-1221	peptide-Gly693+Leu-peptide	P	MS	Gly	Ala	Pro	Gly	Leu	Arg	Gly	Gly	Zhen et al., 2008	22877
GPPGAAGT	PPGA	63679	0.07		collagen alpha-1(III) chain	P02461	154-1221	peptide-Gly717+Ala-peptide	P	MS	Gly	Pro	Pro	Gly	Ala	Ala	Gly	Thr	Zhen et al., 2008	22878
GPPGKNGE	PPGK	89753	0		collagen alpha-1(III) chain	P02461	154-1221	peptide-Gly609+Lys-peptide	P	MS	Gly	Pro	Pro	Gly	Lys	Asn	Gly	Glu	Zhen et al., 2008	22879
GPQGLQGL	PQGL	98	47.86		collagen alpha-1(III) chain	P02461	154-1221	peptide-Gly639+Leu-peptide	P	MS	Gly	Pro	Gln	Gly	Leu	Gln	Gly	Leu	Zhen et al., 2008	22880
GPKGDKGE	PKGD	21647	0.62		collagen alpha-1(III) chain	P02461	154-1221	peptide-Gly741+Asp-peptide	P	MS	Gly	Pro	Lys	Gly	Asp	Lys	Gly	Glu	Zhen et al., 2008	22884
GPAGQPGD	PAGQ	1446	28.67		collagen alpha-1(III) chain	P02461	154-1221	peptide-Gly774+Gln-peptide	P	MS	Gly	Pro	Ala	Gly	Gln	Pro	Gly	Asp	Zhen et al., 2008	22885
GPSGRDGL	PSGR	20938	0.65		collagen alpha-1(IV) chain precursor	P02462	173-1669	peptide-Gly408+Arg-peptide	P		Gly	Pro	Ser	Gly	Arg	Asp	Gly	Leu	Kridel et al., 2001
GPPGIVIG	PPGI	2102	21.77		collagen alpha-1(IV) chain precursor	P02462	173-1669	peptide-Gly332+Ile-peptide	P		Gly	Pro	Pro	Gly	Ile	Val	Ile	Gly	Kridel et al., 2001
GPPGVVGP	PPGV	49591	0.15		collagen alpha-1(V) chain	P20908	38-1605	peptide-Gly439+Val-peptide	P		Gly	Pro	Pro	Gly	Val	Val	Gly	Pro	Niyibizi et al., 1994	18225
TARPWRAD	ARPW	4586	8.22		collagen alpha-1(XVIII) chain	P39060	24-1754	peptide-Pro1530+Trp-peptide	P		Thr	Ala	Arg	Pro	Trp	Arg	Ala	Asp	Heljasvaara et al., 2005	18955
EPQPYPGA	PQPY	333	44.14		collagen alpha-1(XVIII) chain	P39060	24-1754	peptide-Pro1548+Tyr-peptide	P		Glu	Pro	Gln	Pro	Tyr	Pro	Gly	Ala	Heljasvaara et al., 2005	18956
GPPGLRGD	PPGL	981	34.4		collagen alpha-2(V) chain	P05997	27-1229	peptide-Gly942+Leu-peptide	P		Gly	Pro	Pro	Gly	Leu	Arg	Gly	Asp	Kridel et al., 2001	18466
RPAAKVGD	PAAK	7644	3.08		crystallin, beta B1	Q9WVJ5	2-250	peptide-Ala47+Lys-peptide	P	NT	Arg	Pro	Ala	Ala	Lys	Val	Gly	Asp	Descamps et al., 2005	18467
-GGVPGAI	GGVP	75951	0.05		elastin	P15502	27-786	Gly-Gly+Pro-peptide	P	MS	-	Gly	Gly	Val	Pro	Gly	Ala	Ile	Heinz et al., 2010
PGAIPGGV	GAIP	56442	0.11		elastin	P15502	27-786	peptide-Ile33+Pro-peptide	P	MS	Pro	Gly	Ala	Ile	Pro	Gly	Gly	Val	Heinz et al., 2010
AIPGGVPG	IPGG	23550	0.54		elastin	P15502	27-786	peptide-Gly35+Gly-peptide	P	MS	Ala	Ile	Pro	Gly	Gly	Val	Pro	Gly	Heinz et al., 2010
GVPGGVFY	VPGG	19774	0.71		elastin	P15502	27-786	peptide-Gly39+Gly-peptide	P	MS	Gly	Val	Pro	Gly	Gly	Val	Phe	Tyr	Heinz et al., 2010
VPGGVFYP	PGGV	3960	10.6		elastin	P15502	27-786	peptide-Gly40+Val-peptide	P	MS	Val	Pro	Gly	Gly	Val	Phe	Tyr	Pro	Heinz et al., 2010
GVFYPGAG	VFYP	77842	0		elastin	P15502	27-786	peptide-Tyr43+Pro-peptide	P	MS	Gly	Val	Phe	Tyr	Pro	Gly	Ala	Gly	Heinz et al., 2010
YPGAGLGA	PGAG	77232	0		elastin	P15502	27-786	peptide-Ala46+Gly-peptide	P	MS	Tyr	Pro	Gly	Ala	Gly	Leu	Gly	Ala	Heinz et al., 2010
PGAGLGAL	GAGL	16224	0.94		elastin	P15502	27-786	peptide-Gly47+Leu-peptide	P	MS	Pro	Gly	Ala	Gly	Leu	Gly	Ala	Leu	Heinz et al., 2010
GAGLGALG	AGLG	32638	0.32		elastin	P15502	27-786	peptide-Leu48+Gly-peptide	P	MS	Gly	Ala	Gly	Leu	Gly	Ala	Leu	Gly	Heinz et al., 2010
AGLGALGG	GLGA	41137	0.21		elastin	P15502	27-786	peptide-Gly49+Ala-peptide	P	MS	Ala	Gly	Leu	Gly	Ala	Leu	Gly	Gly	Heinz et al., 2010
GLGALGGG	LGAL	3998	10.42		elastin	P15502	27-786	peptide-Ala50+Leu-peptide	P	MS	Gly	Leu	Gly	Ala	Leu	Gly	Gly	Gly	Heinz et al., 2010
VPGGLAGA	PGGL	769	37.07		elastin	P15502	27-786	peptide-Gly69+Leu-peptide	P	MS	Val	Pro	Gly	Gly	Leu	Ala	Gly	Ala	Heinz et al., 2010
GALVPGGV	ALVP	101155	0		elastin	P15502	27-786	peptide-Val92+Pro-peptide	P	MS	Gly	Ala	Leu	Val	Pro	Gly	Gly	Val	Heinz et al., 2010
AAAAYKAA	AAAY	2070	22.04		elastin	P15502	27-786	peptide-Ala102+Tyr-peptide	P	MS	Ala	Ala	Ala	Ala	Tyr	Lys	Ala	Ala	Heinz et al., 2010
GGLGVSAG	GLGV	97769	0		elastin	P15502	27-786	peptide-Gly122+Val-peptide	P	MS	Gly	Gly	Leu	Gly	Val	Ser	Ala	Gly	Heinz et al., 2010
GLGVSAGA	LGVS	12944	1.32		elastin	P15502	27-786	peptide-Val123+Ser-peptide	P	MS	Gly	Leu	Gly	Val	Ser	Ala	Gly	Ala	Heinz et al., 2010
LGYPIKAP	GYPI	26529	0.45		elastin	P15502	27-786	peptide-Pro207+Ile-peptide	P	MS	Leu	Gly	Tyr	Pro	Ile	Lys	Ala	Pro	Heinz et al., 2010
GYPIKAPK	YPIK	19381	0.73		elastin	P15502	27-786	peptide-Ile208+Lys-peptide	P	MS	Gly	Tyr	Pro	Ile	Lys	Ala	Pro	Lys	Heinz et al., 2010
LPGGYGLP	PGGY	2055	22.17		elastin	P15502	27-786	peptide-Gly216+Tyr-peptide	P	MS	Leu	Pro	Gly	Gly	Tyr	Gly	Leu	Pro	Heinz et al., 2010
YGLPYTTG	GLPY	12986	1.32		elastin	P15502	27-786	peptide-Pro220+Tyr-peptide	P	MS	Tyr	Gly	Leu	Pro	Tyr	Thr	Thr	Gly	Heinz et al., 2010
GLPYTTGK	LPYT	8790	2.43		elastin	P15502	27-786	peptide-Tyr221+Thr-peptide	P	MS	Gly	Leu	Pro	Tyr	Thr	Thr	Gly	Lys	Heinz et al., 2010
LPYTTGKL	PYTT	28561	0.4		elastin	P15502	27-786	peptide-Thr222+Thr-peptide	P	MS	Leu	Pro	Tyr	Thr	Thr	Gly	Lys	Leu	Heinz et al., 2010
LPYGYGPG	PYGY	47	48.94		elastin	P15502	27-786	peptide-Gly229+Tyr-peptide	P	MS	Leu	Pro	Tyr	Gly	Tyr	Gly	Pro	Gly	Heinz et al., 2010
GPGGVAGA	PGGV	3960	10.6		elastin	P15502	27-786	peptide-Gly234+Val-peptide	P	MS	Gly	Pro	Gly	Gly	Val	Ala	Gly	Ala	Heinz et al., 2010
GAAGKAGY	AAGK	85952	0		elastin	P15502	27-786	peptide-Gly240+Lys-peptide	P	MS	Gly	Ala	Ala	Gly	Lys	Ala	Gly	Tyr	Heinz et al., 2010
GPQAAAAA	PQAA	8578	2.53		elastin	P15502	27-786	peptide-Ala254+Ala-peptide	P	MS	Gly	Pro	Gln	Ala	Ala	Ala	Ala	Ala	Heinz et al., 2010
QAAAAAAA	AAAA	31285	0.34		elastin	P15502	27-786	peptide-Ala256+Ala-peptide	P	MS	Gln	Ala	Ala	Ala	Ala	Ala	Ala	Ala	Heinz et al., 2010
AAAAAKAA	AAAA	31285	0.34		elastin	P15502	27-786	peptide-Ala259+Ala-peptide	P	MS	Ala	Ala	Ala	Ala	Ala	Lys	Ala	Ala	Heinz et al., 2010
AAAAKAAA	AAAK	91823	0		elastin	P15502	27-786	peptide-Ala260+Lys-peptide	P	MS	Ala	Ala	Ala	Ala	Lys	Ala	Ala	Ala	Heinz et al., 2010
KAAAKFGA	AAAK	91823	0		elastin	P15502	27-786	peptide-Ala264+Lys-peptide	P	MS	Lys	Ala	Ala	Ala	Lys	Phe	Gly	Ala	Heinz et al., 2010
SPEAQAAA	PEAQ	5168	6.46		elastin	P15502	27-786	peptide-Ala441+Gln-peptide	P	MS	Ser	Pro	Glu	Ala	Gln	Ala	Ala	Ala	Heinz et al., 2010
TPAAAAAK	PAAA	6248	4.5		elastin	P15502	27-786	peptide-Ala488+Ala-peptide	P	MS	Thr	Pro	Ala	Ala	Ala	Ala	Ala	Lys	Heinz et al., 2010
AAAAAKAA	AAAA	31285	0.34		elastin	P15502	27-786	peptide-Ala490+Ala-peptide	P	MS	Ala	Ala	Ala	Ala	Ala	Lys	Ala	Ala	Heinz et al., 2010
KAAAKAAQ	AAAK	91823	0		elastin	P15502	27-786	peptide-Ala495+Lys-peptide	P	MS	Lys	Ala	Ala	Ala	Lys	Ala	Ala	Gln	Heinz et al., 2010
AKAAQFGL	KAAQ	88181	0		elastin	P15502	27-786	peptide-Ala498+Gln-peptide	P	MS	Ala	Lys	Ala	Ala	Gln	Phe	Gly	Leu	Heinz et al., 2010
GPGGVAAA	PGGV	3960	10.6		elastin	P15502	27-786	peptide-Gly552+Val-peptide	P	MS	Gly	Pro	Gly	Gly	Val	Ala	Ala	Ala	Heinz et al., 2010
VAAAAKSA	AAAA	31285	0.34		elastin	P15502	27-786	peptide-Ala556+Ala-peptide	P	MS	Val	Ala	Ala	Ala	Ala	Lys	Ser	Ala	Heinz et al., 2010
AAAAKSAA	AAAK	91823	0		elastin	P15502	27-786	peptide-Ala557+Lys-peptide	P	MS	Ala	Ala	Ala	Ala	Lys	Ser	Ala	Ala	Heinz et al., 2010
AAKAQLRA	AKAQ	5413	5.88		elastin	P15502	27-786	peptide-Ala567+Gln-peptide	P	MS	Ala	Ala	Lys	Ala	Gln	Leu	Arg	Ala	Heinz et al., 2010
AQLRAAAG	QLRA	4609	8.17		elastin	P15502	27-786	peptide-Arg570+Ala-peptide	P	MS	Ala	Gln	Leu	Arg	Ala	Ala	Ala	Gly	Heinz et al., 2010
QLRAAAGL	LRAA	3746	11.51		elastin	P15502	27-786	peptide-Ala571+Ala-peptide	P	MS	Gln	Leu	Arg	Ala	Ala	Ala	Gly	Leu	Heinz et al., 2010
AAAGLGAG	AAGL	1867	24.1		elastin	P15502	27-786	peptide-Gly574+Leu-peptide	P	MS	Ala	Ala	Ala	Gly	Leu	Gly	Ala	Gly	Heinz et al., 2010
VPGALAAA	PGAL	447	42.1		elastin	P15502	27-786	peptide-Ala648+Leu-peptide	P	MS	Val	Pro	Gly	Ala	Leu	Ala	Ala	Ala	Heinz et al., 2010
AKAAKYGA	KAAK	62198	0.08		elastin	P15502	27-786	peptide-Ala655+Lys-peptide	P	MS	Ala	Lys	Ala	Ala	Lys	Tyr	Gly	Ala	Heinz et al., 2010
AVPGVLGG	VPGV	124611	0		elastin	P15502	27-786	peptide-Gly663+Val-peptide	P	MS	Ala	Val	Pro	Gly	Val	Leu	Gly	Gly	Heinz et al., 2010
VPGVLGGL	PGVL	9639	2.09		elastin	P15502	27-786	peptide-Val664+Leu-peptide	P	MS	Val	Pro	Gly	Val	Leu	Gly	Gly	Leu	Heinz et al., 2010
GVLGGLGA	VLGG	39134	0.23		elastin	P15502	27-786	peptide-Gly666+Gly-peptide	P	MS	Gly	Val	Leu	Gly	Gly	Leu	Gly	Ala	Heinz et al., 2010
VLGGLGAL	LGGL	6067	4.75		elastin	P15502	27-786	peptide-Gly667+Leu-peptide	P	MS	Val	Leu	Gly	Gly	Leu	Gly	Ala	Leu	Heinz et al., 2010
GGLGALGG	GLGA	41137	0.21		elastin	P15502	27-786	peptide-Gly669+Ala-peptide	P	MS	Gly	Gly	Leu	Gly	Ala	Leu	Gly	Gly	Heinz et al., 2010
GLGALGGV	LGAL	3998	10.42		elastin	P15502	27-786	peptide-Ala670+Leu-peptide	P	MS	Gly	Leu	Gly	Ala	Leu	Gly	Gly	Val	Heinz et al., 2010
IPGGVVGA	PGGV	3960	10.6		elastin	P15502	27-786	peptide-Gly679+Val-peptide	P	MS	Ile	Pro	Gly	Gly	Val	Val	Gly	Ala	Heinz et al., 2010
GGVVGAGP	GVVG	10880	1.73		elastin	P15502	27-786	peptide-Val681+Gly-peptide	P	MS	Gly	Gly	Val	Val	Gly	Ala	Gly	Pro	Heinz et al., 2010
GPAAAAAA	PAAA	6248	4.5		elastin	P15502	27-786	peptide-Ala687+Ala-peptide	P	MS	Gly	Pro	Ala	Ala	Ala	Ala	Ala	Ala	Heinz et al., 2010
AQFGLVGA	QFGL	20662	0.67		elastin	P15502	27-786	peptide-Gly702+Leu-peptide	P	MS	Ala	Gln	Phe	Gly	Leu	Val	Gly	Ala	Heinz et al., 2010
GAAGLGGL	AAGL	1867	24.1		elastin	P15502	27-786	peptide-Gly708+Leu-peptide	P	MS	Gly	Ala	Ala	Gly	Leu	Gly	Gly	Leu	Heinz et al., 2010
GLGVGGLG	LGVG	18729	0.77		elastin	P15502	27-786	peptide-Val714+Gly-peptide	P	MS	Gly	Leu	Gly	Val	Gly	Gly	Leu	Gly	Heinz et al., 2010
GVGGLGVP	VGGL	4254	9.44		elastin	P15502	27-786	peptide-Gly716+Leu-peptide	P	MS	Gly	Val	Gly	Gly	Leu	Gly	Val	Pro	Heinz et al., 2010
GVGGLGGI	VGGL	4254	9.44		elastin	P15502	27-786	peptide-Gly724+Leu-peptide	P	MS	Gly	Val	Gly	Gly	Leu	Gly	Gly	Ile	Heinz et al., 2010
GAAGLGGV	AAGL	1867	24.1		elastin	P15502	27-786	peptide-Gly743+Leu-peptide	P	MS	Gly	Ala	Ala	Gly	Leu	Gly	Gly	Val	Heinz et al., 2010
AAGLGGVL	AGLG	32638	0.32		elastin	P15502	27-786	peptide-Leu744+Gly-peptide	P	MS	Ala	Ala	Gly	Leu	Gly	Gly	Val	Leu	Heinz et al., 2010
AARPGFGL	ARPG	48261	0.16		elastin	P15502	27-786	peptide-Pro763+Gly-peptide	P	MS	Ala	Ala	Arg	Pro	Gly	Phe	Gly	Leu	Heinz et al., 2010
ARPGFGLS	RPGF	17775	0.83		elastin	P15502	27-786	peptide-Gly764+Phe-peptide	P	MS	Ala	Arg	Pro	Gly	Phe	Gly	Leu	Ser	Heinz et al., 2010
GAGVPGFG	AGVP	79998	0		elastin, isoform 2	P15502-2	27-724	peptide-Val606+Pro-peptide	P	MS	Gly	Ala	Gly	Val	Pro	Gly	Phe	Gly	Heinz et al., 2010
GPAAAAAA	PAAA	6248	4.5		elastin, isoform 2	P15502-2	27-724	peptide-Ala687+Ala-peptide	P	MS	Gly	Pro	Ala	Ala	Ala	Ala	Ala	Ala	Heinz et al., 2010
LPVNVTDY	PVNV	1819	24.66		fibrillin-1	P35555	28-2871	peptide-Asn448+Val-peptide	P		Leu	Pro	Val	Asn	Val	Thr	Asp	Tyr	Hindson et al., 1999	18422
ITGLTILN	TGLT	41284	0.21		fibrillin-2	P35556	29-2911	peptide-Leu488+Thr-peptide	P		Ile	Thr	Gly	Leu	Thr	Ile	Leu	Asn	Hindson et al., 1999	18424
GPVEVFIT	PVEV	11804	1.51		fibronectin	P02751	32-2386	peptide-Glu613+Val-peptide	P	MS	Gly	Pro	Val	Glu	Val	Phe	Ile	Thr	Zhen et al., 2008	22495
HPIQWNAP	PIQW	11221	1.64		fibronectin	P02751	32-2386	peptide-Gln629+Trp-peptide	P	MS	His	Pro	Ile	Gln	Trp	Asn	Ala	Pro	Zhen et al., 2008	22502
QTYPSSSG	TYPS	41928	0.21		fibronectin	P02751	32-2386	peptide-Pro606+Ser-peptide	P	MS	Gln	Thr	Tyr	Pro	Ser	Ser	Ser	Gly	Zhen et al., 2008	22542
SPVAVSQS	PVAV	1086	32.82		fibronectin	P02751	32-2386	peptide-Ala44+Val-peptide	P	MS	Ser	Pro	Val	Ala	Val	Ser	Gln	Ser	Doucet & Overall, 2010
APQPSHIS	PQPS	6913	3.69		fibronectin	P02751	32-2386	peptide-Pro635+Ser-peptide	P	MS	Ala	Pro	Gln	Pro	Ser	His	Ile	Ser	Doucet & Overall, 2010
NSYTIKGL	SYTI	55399	0.11		fibronectin	P02751	32-2386	peptide-Thr667+Ile-peptide	P	MS	Asn	Ser	Tyr	Thr	Ile	Lys	Gly	Leu	Doucet & Overall, 2010
PPTNLHLE	PTNL	851	36.13		fibronectin	P02751	32-2386	peptide-Asn1179+Leu-peptide	P	MS	Pro	Pro	Thr	Asn	Leu	His	Leu	Glu	Doucet & Overall, 2010
TNLHLEAN	NLHL	79074	0		fibronectin	P02751	32-2386	peptide-His1181+Leu-peptide	P	MS	Thr	Asn	Leu	His	Leu	Glu	Ala	Asn	Doucet & Overall, 2010
SVYTVKDD	VYTV	110337	0		fibronectin	P02751	32-2386	peptide-Thr1249+Val-peptide	P	MS	Ser	Val	Tyr	Thr	Val	Lys	Asp	Asp	Doucet & Overall, 2010
VAATPTSL	AATP	79654	0		fibronectin	P02751	32-2386	peptide-Thr1460+Pro-peptide	P	MS	Val	Ala	Ala	Thr	Pro	Thr	Ser	Leu	Doucet & Overall, 2010
KPSQMQVT	PSQM	771	37.02		fibronectin	P02751	32-2386	peptide-Gln1547+Met-peptide	P	MS	Lys	Pro	Ser	Gln	Met	Gln	Val	Thr	Doucet & Overall, 2010
ATITGLEP	TITG	47886	0.16		fibronectin	P02751	32-2386	peptide-Thr1961+Gly-peptide	P	MS	Ala	Thr	Ile	Thr	Gly	Leu	Glu	Pro	Doucet & Overall, 2010
EPLQFRVP	PLQF	1232	31.21		fibronectin	P02751	32-2386	peptide-Gln2147+Phe-peptide	P	MS	Glu	Pro	Leu	Gln	Phe	Arg	Val	Pro	Doucet & Overall, 2010
ATYNVIVE	TYNV	86436	0		fibronectin	P02751	32-2386	peptide-Asn2169+Val-peptide	P	MS	Ala	Thr	Tyr	Asn	Val	Ile	Val	Glu	Doucet & Overall, 2010
VNEGLNQP	NEGL	131376	0		fibronectin	P02751	32-2386	peptide-Gly2197+Leu-peptide	P	MS	Val	Asn	Glu	Gly	Leu	Asn	Gln	Pro	Doucet & Overall, 2010
TVSHYAVG	VSHY	2978	15.49		fibronectin	P02751	32-2386	peptide-His2214+Tyr-peptide	P	MS	Thr	Val	Ser	His	Tyr	Ala	Val	Gly	Doucet & Overall, 2010
PPGAYHGA	PGAY	1019	33.81		galectin-3	P17931	2-250	peptide-Ala62+Tyr-peptide	P		Pro	Pro	Gly	Ala	Tyr	His	Gly	Ala	Ochieng et al., 1994	18104
VATELRCQ	ATEL	55705	0.11		growth-regulated protein alpha precursor	P09341	35-107	peptide-Glu40+Leu-peptide	P		Val	Ala	Thr	Glu	Leu	Arg	Cys	Gln	Van den Steen et al., 2003
QSVNVKSP	SVNV	74686	0.05		growth-regulated protein alpha precursor	P09341	35-107	peptide-Asn61+Val-peptide	P		Gln	Ser	Val	Asn	Val	Lys	Ser	Pro	Van den Steen et al., 2003
APRKQLAT	PRKQ	2914	15.87		histone H3.3	P84243	1-136	peptide-Lys19+Gln-peptide	P	NT	Ala	Pro	Arg	Lys	Gln	Leu	Ala	Thr	Kim et al., 2016
RAIHIQAE	AIHI	5549	5.64		hyaluronan and proteoglycan link protein 1	P10915	16-354	peptide-His31+Ile-peptide	P		Arg	Ala	Ile	His	Ile	Gln	Ala	Glu	Nguyen et al., 1993	3239
GERGFFYT	ERGF	106078	0		insulin	P01308	25-54; 90-110	peptide-Gly47+Phe-peptide	P		Gly	Glu	Arg	Gly	Phe	Phe	Tyr	Thr	Deschamps et al., 2002	18578
LVEALYLV	VEAL	7805	2.97		insulin	P01308	25-54,90-110	peptide-Ala38+Leu-peptide	P		Leu	Val	Glu	Ala	Leu	Tyr	Leu	Val	Deschamps et al., 2002	18579
EALYLVCG	ALYL	5536	5.66		insulin	P01308	25-54; 90-110	peptide-Tyr40+Leu-peptide	P		Glu	Ala	Leu	Tyr	Leu	Val	Cys	Gly	Deschamps et al., 2002	18580
CGSHLVEA	GSHL	30461	0.36		insulin	P01308	25-54,90-110	peptide-His34+Leu-peptide	P		Cys	Gly	Ser	His	Leu	Val	Glu	Ala	Deschamps et al., 2002	18581
SICSLYQL	ICSL	10072	1.95		insulin	P01308	25-54; 90-110	peptide-Ser101+Leu-peptide	P		Ser	Ile	Cys	Ser	Leu	Tyr	Gln	Leu	Deschamps et al., 2002	18582
SLYQLENY	LYQL	27321	0.43		insulin	P01308	25-54; 90-110	peptide-Gln104+Leu-peptide	P		Ser	Leu	Tyr	Gln	Leu	Glu	Asn	Tyr	Deschamps et al., 2002	18583
LVCGERGF	VCGE	126726	0		insulin	P01308	25-54; 90-110	peptide-Gly44+Glu-peptide	P		Leu	Val	Cys	Gly	Glu	Arg	Gly	Phe	Deschamps et al., 2002	18584
QLENYCN-	LENY	84333	0		insulin	P01308	25-54; 90-110	peptide-Glu106+Asn-peptide	P		Gln	Leu	Glu	Asn	Tyr	Cys	Asn	-	Deschamps et al., 2002	18585
AFVNQHLC	FVNQ	152354	0		insulin	P01308	25-54,90-110	peptide-Asn27+Gln-peptide	P		Ala	Phe	Val	Asn	Gln	His	Leu	Cys	Deschamps et al., 2002	18586
VNQHLCGS	NQHL	108077	0		insulin	P01308	25-54,90-110	peptide-His29+Leu-peptide	P		Val	Asn	Gln	His	Leu	Cys	Gly	Ser	Deschamps et al., 2002	18587
TNIKKWKE	NIKK	46162	0.17		insulin-like growth factor-binding protein 1	A4D2F4	26-259	peptide-Lys170+Lys-peptide	P		Thr	Asn	Ile	Lys	Lys	Trp	Lys	Glu	Coppock et al., 2004	18530
IVENLLAN	VENL	6408	4.27		interferon beta precursor	P01574	22-187	peptide-Asn107+Leu-peptide	P		Ile	Val	Glu	Asn	Leu	Leu	Ala	Asn	Nelissen et al., 2003	16533
MSYNLLGF	SYNL	2056	22.16		interferon beta precursor	P01574	22-187	peptide-Asn25+Leu-peptide	P		Met	Ser	Tyr	Asn	Leu	Leu	Gly	Phe	Nelissen et al., 2003
LLGFLQRS	LGFL	7190	3.44		interferon beta precursor	P01574	22-187	peptide-Phe29+Leu-peptide	P		Leu	Leu	Gly	Phe	Leu	Gln	Arg	Ser	Nelissen et al., 2003
LGFLQRSS	GFLQ	53618	0.12		interferon beta precursor	P01574	22-187	peptide-Leu30+Gln-peptide	P		Leu	Gly	Phe	Leu	Gln	Arg	Ser	Ser	Nelissen et al., 2003
NVYHQINH	VYHQ	3288	13.69		interferon beta precursor	P01574	22-187	peptide-His114+Gln-peptide	P		Asn	Val	Tyr	His	Gln	Ile	Asn	His	Nelissen et al., 2003
APTGSYSD	PTGS	76317	0.05		laminin subunit alpha-1	P19137	25-3084	peptide-Gly2583+Ser-peptide	P	MS	Ala	Pro	Thr	Gly	Ser	Tyr	Ser	Asp	Doucet & Overall, 2010
LSQVEVIL	SQVE	56615	0.11		laminin subunit beta-1	P02469	22-1786	peptide-Val1557+Glu-peptide	P	MS	Leu	Ser	Gln	Val	Glu	Val	Ile	Leu	Doucet & Overall, 2010
APSSVIAA	PSSV	1761	25.16		LPS-induced CXC chemokine	Q8K3I3	41-132	peptide-Ser44+Val-peptide	P		Ala	Pro	Ser	Ser	Val	Ile	Ala	Ala	Tester et al., 2007
KLANMEAE	LANM	5630	5.47		mannose-binding protein A	P19999	18-238	peptide-Asn97+Met-peptide	P		Lys	Leu	Ala	Asn	Met	Glu	Ala	Glu	Butler et al., 2002	18569
GPPGKLGP	PPGK	89753	0		mannose-binding protein A	P19999	18-238	peptide-Gly62+Lys-peptide	P		Gly	Pro	Pro	Gly	Lys	Leu	Gly	Pro	Butler et al., 2002	18566
GPKGQKGD	PKGQ	865	35.93		mannose-binding protein A	P19999	18-238	peptide-Gly80+Gln-peptide	P		Gly	Pro	Lys	Gly	Gln	Lys	Gly	Asp	Butler et al., 2002	18563
GPPGKLGP	PPGK	89753	0		mannose-binding protein C	P11226	21-248	peptide-Gly74+Lys-peptide	P		Gly	Pro	Pro	Gly	Lys	Leu	Gly	Pro	Butler et al., 2002	18553
TLKAMRTP	LKAM	3985	10.51		matrix metallopeptidase-9	P14780	20-707	peptide-Ala93+Met-peptide	P		Thr	Leu	Lys	Ala	Met	Arg	Thr	Pro	Sang et al., 1995	21336
FPGDLRTN	PGDL	2976	15.51		matrix metallopeptidase-9	P14780	20-707	peptide-Asp34+Leu-peptide	P		Phe	Pro	Gly	Asp	Leu	Arg	Thr	Asn	Geurts et al., 2008	20251
GPALLLLQ	PALL	1189	31.75		matrix metallopeptidase-9	P14780	20-707	peptide-Leu71+Leu-peptide	P		Gly	Pro	Ala	Leu	Leu	Leu	Leu	Gln	Geurts et al., 2008	20252
LSLPETGE	SLPE	58442	0.1		matrix metallopeptidase-9	P14780	20-707	peptide-Pro81+Glu-peptide	P		Leu	Ser	Leu	Pro	Glu	Thr	Gly	Glu	Geurts et al., 2008	20253
QSTLVLFP	STLV	51664	0.13		matrix metallopeptidase-9	P14780	20-707	peptide-Leu28+Val-peptide	P	NT	Gln	Ser	Thr	Leu	Val	Leu	Phe	Pro	Ries et al., 2007	21016
RVAEMRGE	VAEM	7772	2.99		matrix metallopeptidase-9	P14780	20-707	peptide-Glu59+Met-peptide	P		Arg	Val	Ala	Glu	Met	Arg	Gly	Glu	Fridman et al., 1995	21337
PALLLLQK	ALLL	7350	3.3		matrix metallopeptidase-9 precursor	P14780	1-707	peptide-Leu72+Leu-peptide	P		Pro	Ala	Leu	Leu	Leu	Leu	Gln	Lys	Sang et al., 1995	21338
LPRAVIDD	PRAV	523	40.85		matrix metalloproteinase-9	P14780	107-707	peptide-Ala135+Val-peptide	P	MS	Leu	Pro	Arg	Ala	Val	Ile	Asp	Asp	Doucet & Overall, 2010
RAFALWSA	AFAL	844	36.23		matrix metalloproteinase-9	P14780	107-707	peptide-Ala146+Leu-peptide	P	MS	Arg	Ala	Phe	Ala	Leu	Trp	Ser	Ala	Doucet & Overall, 2010
PGPGIQGD	GPGI	81184	0		matrix metalloproteinase-9	P14780	107-707	peptide-Gly197+Ile-peptide	P	MS	Pro	Gly	Pro	Gly	Ile	Gln	Gly	Asp	Doucet & Overall, 2010
DRDKLFGF	RDKL	75975	0.05		matrix metalloproteinase-9	P14780	107-707	peptide-Lys324+Leu-peptide	P	MS	Asp	Arg	Asp	Lys	Leu	Phe	Gly	Phe	Doucet & Overall, 2010
VPEALMYP	PEAL	457	41.93		matrix metalloproteinase-9	P14780	107-707	peptide-Ala417+Leu-peptide	P	MS	Val	Pro	Glu	Ala	Leu	Met	Tyr	Pro	Doucet & Overall, 2010
GPFLIADK	PFLI	2002	22.65		matrix metalloproteinase-9	P14780	107-707	peptide-Leu555+Ile-peptide	P	MS	Gly	Pro	Phe	Leu	Ile	Ala	Asp	Lys	Doucet & Overall, 2010
NSFGLRFG	SFGL	3915	10.79		metastasis-suppressor KiSS-1	Q15726	20-145	peptide-Gly118+Leu-peptide	P		Asn	Ser	Phe	Gly	Leu	Arg	Phe	Gly	Takino et al., 2003	16544
RGLSLSRF	GLSL	6299	4.42		myelin basic protein	P02686	1-304	peptide-Ser111+Leu-peptide	P		Arg	Gly	Leu	Ser	Leu	Ser	Arg	Phe	Proost et al., 1993	18477
VHFFKNIV	HFFK	35897	0.27		myelin basic protein	P02686	1-304	peptide-Phe91+Lys-peptide	P		Val	His	Phe	Phe	Lys	Asn	Ile	Val	Proost et al., 1993	25668
LSRFSWGA	SRFS	12691	1.36		myelin basic protein	P02686	1-304	peptide-Phe248+Ser-peptide	P		Leu	Ser	Arg	Phe	Ser	Trp	Gly	Ala	Proost et al., 1993
SVGKLSQT	VGKL	7569	3.14		myelin basic protein	P04370	1-190	peptide-Lys34+Leu-peptide	P	MS	Ser	Val	Gly	Lys	Leu	Ser	Gln	Thr	Shiryaev et al., 2009
DPKNNWQG	PKNN	12414	1.4		myelin basic protein	P04370	1-190	peptide-Asn75+Asn-peptide	P	MS	Asp	Pro	Lys	Asn	Asn	Trp	Gln	Gly	Shiryaev et al., 2009
DPGNRPHL	PGNR	75191	0.05		myelin basic protein	P04370	1-190	peptide-Asn87+Arg-peptide	P	MS	Asp	Pro	Gly	Asn	Arg	Pro	His	Leu	Shiryaev et al., 2009
ELQTIQED	LQTI	94947	0		myelin basic protein	P04370	1-190	peptide-Thr119+Ile-peptide	P	MS	Glu	Leu	Gln	Thr	Ile	Gln	Glu	Asp	Shiryaev et al., 2009
RSKYLATA	SKYL	37869	0.25		myelin basic protein	P04370	1-190	peptide-Tyr146+Leu-peptide	P	MS	Arg	Ser	Lys	Tyr	Leu	Ala	Thr	Ala	Shiryaev et al., 2009
LPRHRDTG	PRHR	30852	0.35		myelin basic protein	P04370	1-190	peptide-His164+Arg-peptide	P	MS	Leu	Pro	Arg	His	Arg	Asp	Thr	Gly	Shiryaev et al., 2009
RASDYKSA	ASDY	29557	0.38		myelin basic protein isoform 1	P02686	135-304	peptide-Asp123+Tyr-peptide	P		Arg	Ala	Ser	Asp	Tyr	Lys	Ser	Ala	Proost et al., 1993	25669
GSKYLATA	SKYL	37869	0.25		myelin basic protein isoform 1	P02686	135-304	peptide-Tyr15+Leu-peptide	P	MS	Gly	Ser	Lys	Tyr	Leu	Ala	Thr	Ala	Shiryaev et al., 2009	25398
FFKNIVTP	FKNI	59796	0.09		myelin basic protein isoform 1	P02686	135-304	peptide-Asn93+Ile-peptide	P	MS	Phe	Phe	Lys	Asn	Ile	Val	Thr	Pro	Shiryaev et al., 2009	25401
TPPPSQGK	PPPS	32325	0.33		myelin basic protein isoform 1	P02686	135-304	peptide-Pro102+Ser-peptide	P	MS	Thr	Pro	Pro	Pro	Ser	Gln	Gly	Lys	Shiryaev et al., 2009	25403
TLSKIFKL	LSKI	65498	0.07		myelin basic protein isoform 1	P02686	135-304	peptide-Lys153+Ile-peptide	P	MS	Thr	Leu	Ser	Lys	Ile	Phe	Lys	Leu	Shiryaev et al., 2009	25404
ESDELQTI	SDEL	135223	0		myelin basic protein isoform 1	P04370	1-246	peptide-Glu116+Leu-peptide	P	MS	Glu	Ser	Asp	Glu	Leu	Gln	Thr	Ile	Shiryaev et al., 2009	25528
ELQTIQED	LQTI	94947	0		myelin basic protein isoform 1	P04370	1-246	peptide-Thr119+Ile-peptide	P	MS	Glu	Leu	Gln	Thr	Ile	Gln	Glu	Asp	Shiryaev et al., 2009	25529
SQRSKYLA	QRSK	88035	0		myelin basic protein isoform 1	P04370	1-246	peptide-Ser144+Lys-peptide	P	MS	Ser	Gln	Arg	Ser	Lys	Tyr	Leu	Ala	Shiryaev et al., 2009	25530
RSKYLATA	SKYL	37869	0.25		myelin basic protein isoform 1	P04370	1-246	peptide-Tyr146+Leu-peptide	P	MS	Arg	Ser	Lys	Tyr	Leu	Ala	Thr	Ala	Shiryaev et al., 2009	25531
LATASTMD	ATAS	57935	0.1		myelin basic protein isoform 1	P04370	1-246	peptide-Ala150+Ser-peptide	P	MS	Leu	Ala	Thr	Ala	Ser	Thr	Met	Asp	Shiryaev et al., 2009	25532
HARHGFLP	ARHG	80772	0		myelin basic protein isoform 1	P04370	1-246	peptide-His158+Gly-peptide	P	MS	His	Ala	Arg	His	Gly	Phe	Leu	Pro	Shiryaev et al., 2009	25533
HYGSLPQK	YGSL	14945	1.06		myelin basic protein isoform 1	P04370	1-246	peptide-Ser201+Leu-peptide	P	MS	His	Tyr	Gly	Ser	Leu	Pro	Gln	Lys	Shiryaev et al., 2009	25534
GSLPQKSQ	SLPQ	57995	0.1		myelin basic protein isoform 1	P04370	1-246	peptide-Pro203+Gln-peptide	P	MS	Gly	Ser	Leu	Pro	Gln	Lys	Ser	Gln	Shiryaev et al., 2009	25535
LPQKSQHG	PQKS	72303	0.06		myelin basic protein isoform 1	P04370	1-246	peptide-Lys205+Ser-peptide	P	MS	Leu	Pro	Gln	Lys	Ser	Gln	His	Gly	Shiryaev et al., 2009	25536
LPRHRDTG	PRHR	30852	0.35		myelin basic protein isoform 1	P02686	135-304	peptide-His33+Arg-peptide	P	MS	Leu	Pro	Arg	His	Arg	Asp	Thr	Gly	Shiryaev et al., 2009	25954
IVTPRTPP	VTPR	26081	0.46		myelin basic protein isoform 1	P02686	135-304	peptide-Pro97+Arg-peptide	P	MS	Ile	Val	Thr	Pro	Arg	Thr	Pro	Pro	Shiryaev et al., 2009	25956
VHFFKNIV	HFFK	35897	0.27		myelin basic protein isoform 1	P02686	135-304	peptide-Phe224+Lys-peptide	P	MS	Val	His	Phe	Phe	Lys	Asn	Ile	Val	Shiryaev et al., 2009	18479
VAPPPVVL	APPP	83408	0		plasminogen	P00747	20-810	peptide-Pro465+Pro-peptide	P		Val	Ala	Pro	Pro	Pro	Val	Val	Leu	Patterson & Sang, 1997	3249
LDSDLYAE	DSDL	128028	0		platelet basic protein	P02775	35-128	peptide-Asp56+Leu-peptide	P		Leu	Asp	Ser	Asp	Leu	Tyr	Ala	Glu	Van den Steen et al., 2003	18387
LYAELRCM	YAEL	83714	0		platelet basic protein	P02775	35-128	peptide-Glu60+Leu-peptide	P		Leu	Tyr	Ala	Glu	Leu	Arg	Cys	Met	Van den Steen et al., 2003	18391
ELRCMCIK	LRCM	6720	3.9		platelet basic protein	P02775	35-128	peptide-Cys63+Met-peptide	P		Glu	Leu	Arg	Cys	Met	Cys	Ile	Lys	Van den Steen et al., 2003	18392
HPKNIQSL	PKNI	177	46.69		platelet basic protein	P02775	35-128	peptide-Asn76+Ile-peptide	P		His	Pro	Lys	Asn	Ile	Gln	Ser	Leu	Van den Steen et al., 2003	18390
QSLEVIGK	SLEV	89374	0		platelet basic protein	P02775	35-128	peptide-Glu81+Val-peptide	P		Gln	Ser	Leu	Glu	Val	Ile	Gly	Lys	Van den Steen et al., 2003	18389
VIATLKDG	IATL	42593	0.2		platelet basic protein	P02775	35-128	peptide-Thr97+Leu-peptide	P		Val	Ile	Ala	Thr	Leu	Lys	Asp	Gly	Van den Steen et al., 2003	18388
RIKKIVQK	IKKI	95370	0		platelet basic protein	P02775	35-128	peptide-Lys115+Ile-peptide	P		Arg	Ile	Lys	Lys	Ile	Val	Gln	Lys	Van den Steen et al., 2003	18386
AFCLSEDA	FCLS	37837	0.25		pregnancy zone protein	P20742	26-1482	peptide-Leu778+Ser-peptide	P		Ala	Phe	Cys	Leu	Ser	Glu	Asp	Ala	Arbelez et al., 1997	3240
LPSLQMAD	PSLQ	11624	1.54		prolactin	P01236	29-227	peptide-Leu184+Gln-peptide	P		Leu	Pro	Ser	Leu	Gln	Met	Ala	Asp	Macotela et al., 2006	21575
APEAILSK	PEAI	832	36.36		prolactin	P01236	29-227	peptide-Ala139+Ile-peptide	P		Ala	Pro	Glu	Ala	Ile	Leu	Ser	Lys	Macotela et al., 2006
NKDIVTVA	KDIV	53133	0.12		SERPINE2 plasminogen activator inhibitor type 1, member 2 isoform a precursor	P07093	20-398	peptide-Ile107+Val-peptide	P	MS	Asn	Lys	Asp	Ile	Val	Thr	Val	Ala	Xu et al., 2008	22544
KKNKDIVT	KNKD	132671	0		SERPINE2 plasminogen activator inhibitor type 1, member 2 isoform a precursor	P07093	20-398	peptide-Lys105+Asp-peptide	P	MS	Lys	Lys	Asn	Lys	Asp	Ile	Val	Thr	Xu et al., 2008	22783
SVLGMLQL	VLGM	1180	31.84		SERPINE2 plasminogen activator inhibitor type 1, member 2 isoform a precursor	P07093	20-398	peptide-Gly63+Met-peptide	P	MS	Ser	Val	Leu	Gly	Met	Leu	Gln	Leu	Xu et al., 2008	22784
PHGIASVL	HGIA	30773	0.35		SERPINE2 plasminogen activator inhibitor type 1, member 2 isoform a precursor	P07093	20-398	peptide-Ile58+Ala-peptide	P	MS	Pro	His	Gly	Ile	Ala	Ser	Val	Leu	Xu et al., 2008	22785
SPHGIASV	PHGI	292	44.81		SERPINE2 plasminogen activator inhibitor type 1, member 2 isoform a precursor	P07093	20-398	peptide-Gly57+Ile-peptide	P	MS	Ser	Pro	His	Gly	Ile	Ala	Ser	Val	Xu et al., 2008	22786
ISMLIALP	SMLI	46637	0.17		SERPINE2 plasminogen activator inhibitor type 1, member 2 isoform a precursor	P07093	20-398	peptide-Leu254+Ile-peptide	P	MS	Ile	Ser	Met	Leu	Ile	Ala	Leu	Pro	Xu et al., 2008	22787
FTAVAQTD	TAVA	29374	0.38		SERPINE2 plasminogen activator inhibitor type 1, member 2 isoform a precursor	P07093	20-398	peptide-Val299+Ala-peptide	P	MS	Phe	Thr	Ala	Val	Ala	Gln	Thr	Asp	Xu et al., 2008	22788
KVLGITDM	VLGI	1502	28		SERPINE2 plasminogen activator inhibitor type 1, member 2 isoform a precursor	P07093	20-398	peptide-Gly312+Ile-peptide	P	MS	Lys	Val	Leu	Gly	Ile	Thr	Asp	Met	Xu et al., 2008	22789
KITRSENL	ITRS	49892	0.14		SERPINE2 plasminogen activator inhibitor type 1, member 2 isoform a precursor	P07093-2	20-397	peptide-Arg329+Ser-peptide	P	MS	Lys	Ile	Thr	Arg	Ser	Glu	Asn	Leu	Xu et al., 2008	22790
KIEVSEDG	IEVS	54798	0.12		SERPINE2 plasminogen activator inhibitor type 1, member 2 isoform a precursor	P07093	20-398	peptide-Val347+Ser-peptide	P	MS	Lys	Ile	Glu	Val	Ser	Glu	Asp	Gly	Xu et al., 2008	22791
ARSSPPWF	RSSP	89132	0		SERPINE2 plasminogen activator inhibitor type 1, member 2 isoform a precursor	P07093	20-398	peptide-Ser367+Pro-peptide	P	MS	Ala	Arg	Ser	Ser	Pro	Pro	Trp	Phe	Xu et al., 2008	22792
APSSVIAA	PSSV	1761	25.16		small inducible cytokine B5 precursor	P50228	41-132	peptide-Ser44+Val-peptide	P		Ala	Pro	Ser	Ser	Val	Ile	Ala	Ala	Van den Steen et al., 2003	18607
GPVSAVLT	PVSA	41519	0.21		small inducible cytokine B6	P80162	38-114	peptide-Ser41+Ala-peptide	P		Gly	Pro	Val	Ser	Ala	Val	Leu	Thr	Van den Steen et al., 2003	18602
PVSAVLTE	VSAV	17799	0.82		small inducible cytokine B6	P80162	38-114	peptide-Ala42+Val-peptide	P		Pro	Val	Ser	Ala	Val	Leu	Thr	Glu	Van den Steen et al., 2003	18603
VSAVLTEL	SAVL	21959	0.61		small inducible cytokine B6	P80162	38-114	peptide-Val43+Leu-peptide	P		Val	Ser	Ala	Val	Leu	Thr	Glu	Leu	Van den Steen et al., 2003	18604
GANPVQVE	ANPV	32101	0.33		SPARC	P09486	18-303	peptide-Pro47+Val-peptide	P		Gly	Ala	Asn	Pro	Val	Gln	Val	Glu	Sasaki et al., 1997	18254
NPVQVEVG	PVQV	14185	1.15		SPARC	P09486	18-303	peptide-Gln49+Val-peptide	P		Asn	Pro	Val	Gln	Val	Glu	Val	Gly	Sasaki et al., 1997	18255
HPVELLAR	PVEL	921	35.1		SPARC	P09486	18-303	peptide-Glu214+Leu-peptide	P		His	Pro	Val	Glu	Leu	Leu	Ala	Arg	Sasaki et al., 1997	18256
KPVSLSYR	PVSL	430	42.36		stromal cell-derived factor 1	P48061	22-93	peptide-Ser25+Leu-peptide	P		Lys	Pro	Val	Ser	Leu	Ser	Tyr	Arg	Van den Steen et al., 2003	18616
KPQQFFGL	PQQF	3791	11.32		substance P	P20366	58-68	peptide-Gln63+Phe-peptide	P		Lys	Pro	Gln	Gln	Phe	Phe	Gly	Leu	Backstrom & Tokes, 1995	18402
QFFGLMGK	FFGL	8077	2.8		substance P	P20366	58-68	peptide-Gly66+Leu-peptide	P		Gln	Phe	Phe	Gly	Leu	Met	Gly	Lys	Backstrom & Tokes, 1995	18406
EPTGLEAT	PTGL	587	39.89		syndecan-1	P18827	23-310	peptide-Gly82+Leu-peptide	P	NT	Glu	Pro	Thr	Gly	Leu	Glu	Ala	Thr	Manon-Jensen et al., 2013
EPKKLEEN	PKKL	1884	23.95		syndecan-4	P31431	19-198	peptide-Lys105+Leu-peptide	P	NT	Glu	Pro	Lys	Lys	Leu	Glu	Glu	Asn	Manon-Jensen et al., 2013
PPLKLMHS	PLKL	356	43.59		tissue factor pathway inhibitor	P10646	29-304	peptide-Lys48+Leu-peptide	P		Pro	Pro	Leu	Lys	Leu	Met	His	Ser	Belaaouaj et al., 2000	18105
LVYMVTGN	VYMV	83872	0		von Willebrand factor	P04275	764-2813	Peptide-Met1606+Val-Peptide	P	MS	Leu	Val	Tyr	Met	Val	Thr	Gly	Asn	Raife et al., 2009

## Sheet: D.MMP9 all substr from MEROPS
S17 Table. (D) Tetramer annotation of MMP-9 cleavage sites in all substrates collected in MEROPS database
MEROPS octamers	tetramer sequence	Relative probability (RP) rank	relative probability (RP)		MEROPS annotation:	Substrate	Uniprot	Residue range	Cleavage Site	Cleavage type	Evidence	P4	P3	P2	P1	P1'	P2'	P3'	P4'	Reference	CutDB
AAAAAKAA	AAAA	31285	0.34			elastin	P15502	27-786	peptide-Ala259+Ala-peptide	P	MS	Ala	Ala	Ala	Ala	Ala	Lys	Ala	Ala	Heinz et al., 2010
AAAAKAAA	AAAK	91823	0			elastin	P15502	27-786	peptide-Ala260+Lys-peptide	P	MS	Ala	Ala	Ala	Ala	Lys	Ala	Ala	Ala	Heinz et al., 2010
AAAAKSAA	AAAK	91823	0			elastin	P15502	27-786	peptide-Ala557+Lys-peptide	P	MS	Ala	Ala	Ala	Ala	Lys	Ser	Ala	Ala	Heinz et al., 2010
AAAAYKAA	AAAY	2070	22.04			elastin	P15502	27-786	peptide-Ala102+Tyr-peptide	P	MS	Ala	Ala	Ala	Ala	Tyr	Lys	Ala	Ala	Heinz et al., 2010
AAAGLGAG	AAGL	1867	24.1			elastin	P15502	27-786	peptide-Gly574+Leu-peptide	P	MS	Ala	Ala	Ala	Gly	Leu	Gly	Ala	Gly	Heinz et al., 2010
AAAVLREL	AAVL	22587	0.58			C-X-C motif chemokine 5	P42830	37-114	peptide-Val43+Leu-peptide	P		Ala	Ala	Ala	Val	Leu	Arg	Glu	Leu	Van den Steen et al., 2003	18598
AAGLGGVL	AGLG	32638	0.32			elastin	P15502	27-786	peptide-Leu744+Gly-peptide	P	MS	Ala	Ala	Gly	Leu	Gly	Gly	Val	Leu	Heinz et al., 2010
AAKAQLRA	AKAQ	5413	5.88			elastin	P15502	27-786	peptide-Ala567+Gln-peptide	P	MS	Ala	Ala	Lys	Ala	Gln	Leu	Arg	Ala	Heinz et al., 2010
AARPGFGL	ARPG	48261	0.16			elastin	P15502	27-786	peptide-Pro763+Gly-peptide	P	MS	Ala	Ala	Arg	Pro	Gly	Phe	Gly	Leu	Heinz et al., 2010
-ACGLVAS	ACGL	4816	7.47			Galectin-1	P16045	2-135	Ala-Cys-Gly4+Leu-peptide	N	MS	-	Ala	Cys	Gly	Leu	Val	Ala	Ser	Prudova et al., 2010
AFCLSEDA	FCLS	37837	0.25			pregnancy zone protein	P20742	26-1482	peptide-Leu778+Ser-peptide	P		Ala	Phe	Cys	Leu	Ser	Glu	Asp	Ala	Arbelez et al., 1997	3240
AFVNQHLC	FVNQ	152354	0			insulin	P01308	25-54,90-110	peptide-Asn27+Gln-peptide	P		Ala	Phe	Val	Asn	Gln	His	Leu	Cys	Deschamps et al., 2002	18586
AGLGALGG	GLGA	41137	0.21			elastin	P15502	27-786	peptide-Gly49+Ala-peptide	P	MS	Ala	Gly	Leu	Gly	Ala	Leu	Gly	Gly	Heinz et al., 2010
AIIGLMVG	IIGL	15777	0.98			beta-amyloid protein 42	P05067	672-713	peptide-Gly704+Leu-peptide	P		Ala	Ile	Ile	Gly	Leu	Met	Val	Gly	Yan et al., 2006	18636
AIPGGVPG	IPGG	23550	0.54			elastin	P15502	27-786	peptide-Gly35+Gly-peptide	P	MS	Ala	Ile	Pro	Gly	Gly	Val	Pro	Gly	Heinz et al., 2010
AKAAKYGA	KAAK	62198	0.08			elastin	P15502	27-786	peptide-Ala655+Lys-peptide	P	MS	Ala	Lys	Ala	Ala	Lys	Tyr	Gly	Ala	Heinz et al., 2010
AKAAQFGL	KAAQ	88181	0			elastin	P15502	27-786	peptide-Ala498+Gln-peptide	P	MS	Ala	Lys	Ala	Ala	Gln	Phe	Gly	Leu	Heinz et al., 2010
APEAILSK	PEAI	832	36.36			prolactin	P01236	29-227	peptide-Ala139+Ile-peptide	P		Ala	Pro	Glu	Ala	Ile	Leu	Ser	Lys	Macotela et al., 2006
APFAVIGS	PFAV	357	43.58			Septin-5	Q9Z2Q6	1-369	peptide-Ala245+Val-peptide	N	MS	Ala	Pro	Phe	Ala	Val	Ile	Gly	Ser	Prudova et al., 2010
APLGLLAR	PLGL	43	48.99			QF-24			Mca-Pro-Leu-Gly+Leu-Dpa-Ala-Arg-NH2	S		Mca	Pro	Leu	Gly	Leu	Dpa	Ala	Arg	Bannikov et al., 2004
APQPSHIS	PQPS	6913	3.69			fibronectin	P02751	32-2386	peptide-Pro635+Ser-peptide	P	MS	Ala	Pro	Gln	Pro	Ser	His	Ile	Ser	Doucet & Overall, 2010
APRKQLAT	PRKQ	2914	15.87			histone H3.3	P84243	1-136	peptide-Lys19+Gln-peptide	P	NT	Ala	Pro	Arg	Lys	Gln	Leu	Ala	Thr	Kim et al., 2016
APSSVIAA	PSSV	1761	25.16			LPS-induced CXC chemokine	Q8K3I3	41-132	peptide-Ser44+Val-peptide	P		Ala	Pro	Ser	Ser	Val	Ile	Ala	Ala	Tester et al., 2007
APSWFDTG	PSWF	1284	30.39			alpha crystallin B chain	P02511	1-175	peptide-Trp60+Phe-peptide	P		Ala	Pro	Ser	Trp	Phe	Asp	Thr	Gly	Starckx et al., 2003	18279
APTGSYSD	PTGS	76317	0.05			laminin subunit alpha-1	P19137	25-3084	peptide-Gly2583+Ser-peptide	P	MS	Ala	Pro	Thr	Gly	Ser	Tyr	Ser	Asp	Doucet & Overall, 2010
AQFGLVGA	QFGL	20662	0.67			elastin	P15502	27-786	peptide-Gly702+Leu-peptide	P	MS	Ala	Gln	Phe	Gly	Leu	Val	Gly	Ala	Heinz et al., 2010
AQLRAAAG	QLRA	4609	8.17			elastin	P15502	27-786	peptide-Arg570+Ala-peptide	P	MS	Ala	Gln	Leu	Arg	Ala	Ala	Ala	Gly	Heinz et al., 2010
ARPGFGLS	RPGF	17775	0.83			elastin	P15502	27-786	peptide-Gly764+Phe-peptide	P	MS	Ala	Arg	Pro	Gly	Phe	Gly	Leu	Ser	Heinz et al., 2010
ARSSPPWF	RSSP	89132	0			SERPINE2 plasminogen activator inhibitor type 1, member 2 isoform a precursor	P07093	20-398	peptide-Ser367+Pro-peptide	P	MS	Ala	Arg	Ser	Ser	Pro	Pro	Trp	Phe	Xu et al., 2008	22792
ATITGLEP	TITG	47886	0.16			fibronectin	P02751	32-2386	peptide-Thr1961+Gly-peptide	P	MS	Ala	Thr	Ile	Thr	Gly	Leu	Glu	Pro	Doucet & Overall, 2010
[truncated: 328 more rows]

## Sheet: E. General statistics
S17 Table. (E). General statistics - MEROPS data
MMP-2
[truncated: 6 more rows]

## Sheet: F.common_physiol_MMP2-9_MMP2-RP
S17 Table. (F). Physiologic MMP2 substrates common with MMP9 in MEROPS. RP according to MMP2 and MMP9
[truncated: 126 more rows]

[truncated: 2 more sheets: G.MMP2_physiol_substr_unique, H.MMP9_physiol_substr_unique]
